# Supplementary material for: Sense–antisense miRNA pairs constitute an elaborate reciprocal regulatory circuit
Source: HighWire-hosted journal article supplement (doi:10.1101/gr.257121.119), 2020-05-01
Supplement: Supplemental_Table_S1.xlsx [file Supplemental_Table_S1.xlsx]

## Sheet: Normal tissues-miR-mmPCR
Supplemental Table S1. High-throughput sequencing summary.
Sample	Mapped read*
Frontal gyrus, N10	1275558
Frontal gyrus, N13	1208204
Cerebellar cortex, N10	1316240
Cerebellar cortex, N13	1889796
Callosum, N10	1365728
Callosum, N13	1301297
Anterior cingulate gyrus, N10	1271098
Anterior cingulate gyrus, N13	993417
Substantia nigra, N10	1304438
Substantia nigra, N13	986620
Brain (whole)	1604287
Cerebellum	1694460
Spinal cord	991204
Colon	1190728
Fetal brain	1164628
Fetal liver	1083465
Bone marrow	636286
Heart	864886
Kidney	1734481
Liver	466077
Lung	723894
Muscle	1036427
Placenta	1090680
Prostate	1364037
Small intestine	1324116
Spleen	1278880
Stomach	1053496
Testis	1590743
Thymus	1146564
Uterus	864052
*for each sample, two technical replicates were sequenced and the sum of the reads were shown.

## Sheet: Breast samples-miR-mmPCR
Sample	Mapped read*
Breast, N1	1384055
Breast, N2	1512228
Breast, N3	2029547
Breast, N4	1580369
Breast, N5	1923402
Breast, N6	1533276
Breast, N7	1582514
Breast, N8	1083431
Breast, N9	1160390
Breast, N10	1289164
Breast, T1	1211352
Breast, T2	1364872
Breast, T3	1565960
Breast, T4	2305181
Breast, T5	2066179
Breast, T6	2098386
Breast, T7	1944216
Breast, T8	1783871
Breast, T9	894639
Breast, T10	1496318
T, tumor tissues; N, adjacent non-tumor tissues

## Sheet: Breast samples-mmPCR
Sample	Mapped read*
Breast, N1	477443
Breast, N2	479812
Breast, N3	758988
Breast, N4	396939
Breast, N5	408903
Breast, N6	659209
Breast, N7	121082
Breast, N8	124853
Breast, N9	99618
Breast, N10	1092
Breast, T1	339675
Breast, T2	604643
Breast, T3	223090
Breast, T4	552051
Breast, T5	387701
Breast, T6	827090
Breast, T7	338410
Breast, T8	177703
Breast, T9	335155
Breast, T10	371684
T, tumor tissues; N, adjacent non-tumor tissues

## Sheet: Tan M. H., et.-mmPCR
Sample	Mapped read#
Cerebellum, Young Adult	3929588
Cerebellum, 25yrs	6624623
Colon, 25yrs	3075253
Corpus Callosum, Young Adult	1329304
Diencephalon, Young Adult	1412456
Frontal Lobe, 18wks	1273325
Frontal Lobe, 38wks	1371708
Frontal Lobe, Young Adult	1344124
Frontal Lobe, 25yrs	1551631
Heart, 25yrs	4934810
Kidney, Young Adult	1364872
Liver, 18wks	1364625
Liver, 38wks	1413329
Liver, Young Adult	3309142
Liver, 25yrs	6734523
Lung, 18wks	1222148
Lung, 38wks	1331885
Lung, Young Adult	3236097
Lung, 25yrs	6581238
Muscle, 18wks	1382894
Muscle, 38wks	1321988
Muscle, 25yrs	3124527
Pancreas, 25yrs	3117171
Parietal Lobe, Young Adult	838946
Small Intestine, 18wks	1,4434,48
Small Intestine, 38wks	1335470
Small Intestine, Young Adult	3138775
Small Intestine, 25yrs	3215960
Stomach, 25yrs	6829147
Temporal Lobe, Young Adult	3883749
GM12878	2471850
GM12891	3208510
GM12892	3223596
H1, ESC	1319546
H1, Neuron	1147872
2fTGH, Cell	4223878
PGP1, Neuron	1034852
PGP1, iPSC	1326396
yrs,years; wks, weeks
#for each tissue or cell type, replicates were merged and the sum of the reads were shown.

## Sheet: small-RNA-seq
	Hela
	Control	Drosha KD
Total read	7946083	8191717
Clean read	1183256	786662
Mapped read	1155331	770063
Mapping rate (%)	97.64	97.89
Uniquely mapped read	248598	155798
Mapping rate (%)	21.01	19.8

## Sheet: Strand-RNA-seq
	HEK293		HeLa
	Control	ADAR1 KO	Control	Drosha KD
Total read	39229013	40756923	107543572	94817846
Clean read	37797249	39293441	103675450	90704960
Mapped read	36474345	37643116	99424756	86895351
Mapping rate (%)	96.5	95.8	95.9	95.8
Uniquely mapped read	35340427	36425019	95796115	83720678
Mapping rate (%)	93.5	92.7	92.4	92.3
