# Supplementary material for: Sense–antisense miRNA pairs constitute an elaborate reciprocal regulatory circuit
Source: HighWire-hosted journal article supplement (doi:10.1101/gr.257121.119), 2020-05-01
Supplement: Supplemental_Table_S2.xlsx [file Supplemental_Table_S2.xlsx]

## Sheet: Description
Supplemental Table S2. A-to-I RNA editing site list in miRNAs-ATs.
Field	Example	Description
Position	chr10@23682335	The genomic position of the RNA variant
Editing level	0.164	The highest editing level of the variant in all samples we studied
Chr	chr10	Chromosome of the amplified miRNA locus
Start	23682287	5' start of the amplified miRNA locus
End	23682494	3'end of the ampflied miRNA locus
Targeted miRNA	hsa-mir-1254-2	The miRNA used to design miR-mmPCR-seq primers
Strand	+	+ or - for miRNA strand
Type	3-Precusor	The location corresponding to the sense pre-miRNA
miRNA	hsa-mir-1254-2	Overlapped sense miRNA

## Sheet: site_list
Position	Editing level	Chr	Start	End	Targeted miRNA	Strand	Type	miRNA
chr10@23682322	0.06	chr10	23682287	23682494	hsa-mir-1254-2	+	Pre-miRNA flanking region
chr10@23682331	0.05	chr10	23682287	23682494	hsa-mir-1254-2	+	Pre-miRNA flanking region
chr10@23682335	0.22	chr10	23682287	23682494	hsa-mir-1254-2	+	Pre-miRNA	hsa-mir-1254-2
chr10@23682341	0.53	chr10	23682287	23682494	hsa-mir-1254-2	+	Pre-miRNA	hsa-mir-1254-2
chr10@23682365	0.28	chr10	23682287	23682494	hsa-mir-1254-2	+	Pre-miRNA	hsa-mir-1254-2
chr10@23682370	0.04	chr10	23682287	23682494	hsa-mir-1254-2	+	Pre-miRNA	hsa-mir-1254-2
chr10@23682375	0.05	chr10	23682287	23682494	hsa-mir-1254-2	+	Pre-miRNA	hsa-mir-1254-2
chr10@23682381	0.73	chr10	23682287	23682494	hsa-mir-1254-2	+	Pre-miRNA	hsa-mir-1254-2
chr10@23682384	0.14	chr10	23682287	23682494	hsa-mir-1254-2	+	Pre-miRNA	hsa-mir-1254-2
chr10@23682386	0.6	chr10	23682287	23682494	hsa-mir-1254-2	+	Pre-miRNA	hsa-mir-1254-2
chr10@23682391	0.03	chr10	23682287	23682494	hsa-mir-1254-2	+	Pre-miRNA	hsa-mir-1254-2
chr10@23682401	0.34	chr10	23682287	23682494	hsa-mir-1254-2	+	Pre-miRNA flanking region
chr10@23682409	0.6	chr10	23682287	23682494	hsa-mir-1254-2	+	Pre-miRNA flanking region
chr10@23682410	0.59	chr10	23682287	23682494	hsa-mir-1254-2	+	Pre-miRNA flanking region
chr10@23682413	0.03	chr10	23682287	23682494	hsa-mir-1254-2	+	Pre-miRNA flanking region
chr10@23682415	0.18	chr10	23682287	23682494	hsa-mir-1254-2	+	Pre-miRNA flanking region
chr10@23682433	0.04	chr10	23682287	23682494	hsa-mir-1254-2	+	Pre-miRNA flanking region
chr10@28578115	0.03	chr10	28578093	28578364	hsa-mir-8086	-	Pre-miRNA flanking region
chr10@28578119	0.04	chr10	28578093	28578364	hsa-mir-8086	-	Pre-miRNA flanking region
chr10@28578123	0.1	chr10	28578093	28578364	hsa-mir-8086	-	Pre-miRNA flanking region
chr10@28578132	0.03	chr10	28578093	28578364	hsa-mir-8086	-	Pre-miRNA flanking region
chr10@28578139	0.02	chr10	28578093	28578364	hsa-mir-8086	-	Pre-miRNA flanking region
chr10@28578150	0.05	chr10	28578093	28578364	hsa-mir-8086	-	Pre-miRNA flanking region
chr10@28578151	0.07	chr10	28578093	28578364	hsa-mir-8086	-	Pre-miRNA flanking region
chr10@28578155	0.07	chr10	28578093	28578364	hsa-mir-8086	-	Pre-miRNA flanking region
chr10@28578164	0.03	chr10	28578093	28578364	hsa-mir-8086	-	Pre-miRNA flanking region
chr10@28578171	0.05	chr10	28578093	28578364	hsa-mir-8086	-	Pre-miRNA flanking region
chr10@28578175	0.02	chr10	28578093	28578364	hsa-mir-8086	-	Pre-miRNA flanking region
chr10@28578180	0.09	chr10	28578093	28578364	hsa-mir-8086	-	Pre-miRNA flanking region
chr10@28578185	0.06	chr10	28578093	28578364	hsa-mir-8086	-	Pre-miRNA flanking region
chr10@28578200	0.03	chr10	28578093	28578364	hsa-mir-8086	-	Pre-miRNA	hsa-mir-8086
chr10@28578209	0.07	chr10	28578093	28578364	hsa-mir-8086	-	Pre-miRNA	hsa-mir-8086
chr10@28578214	0.02	chr10	28578093	28578364	hsa-mir-8086	-	Pre-miRNA	hsa-mir-8086
chr10@28578220	0.11	chr10	28578093	28578364	hsa-mir-8086	-	Pre-miRNA	hsa-mir-8086
chr10@28578225	0.07	chr10	28578093	28578364	hsa-mir-8086	-	Pre-miRNA	hsa-mir-8086
chr10@28578240	0.04	chr10	28578093	28578364	hsa-mir-8086	-	Pre-miRNA	hsa-mir-8086
chr10@28578241	0.03	chr10	28578093	28578364	hsa-mir-8086	-	Pre-miRNA	hsa-mir-8086
chr10@70519110	0.02	chr10	70518991	70519233	hsa-mir-1254-1	+	Pre-miRNA	hsa-mir-1254-1
chr10@70519128	0.03	chr10	70518991	70519233	hsa-mir-1254-1	+	Pre-miRNA	hsa-mir-1254-1
chr11@18409284	0.04	chr11	18409263	18409519	hsa-mir-3159	+	Pre-miRNA flanking region
chr11@18409300	0.26	chr11	18409263	18409519	hsa-mir-3159	+	Pre-miRNA flanking region
chr11@18409303	0.37	chr11	18409263	18409519	hsa-mir-3159	+	Pre-miRNA flanking region
chr11@18409308	0.11	chr11	18409263	18409519	hsa-mir-3159	+	Pre-miRNA flanking region
chr11@18409316	0.02	chr11	18409263	18409519	hsa-mir-3159	+	Pre-miRNA flanking region
chr11@18409322	0.02	chr11	18409263	18409519	hsa-mir-3159	+	Pre-miRNA flanking region
chr11@18409325	0.37	chr11	18409263	18409519	hsa-mir-3159	+	Pre-miRNA flanking region
chr11@18409326	0.35	chr11	18409263	18409519	hsa-mir-3159	+	Pre-miRNA flanking region
chr11@18409348	0.06	chr11	18409263	18409519	hsa-mir-3159	+	Pre-miRNA	hsa-mir-3159
chr11@18409355	0.28	chr11	18409263	18409519	hsa-mir-3159	+	Pre-miRNA	hsa-mir-3159
chr11@18409357	0.09	chr11	18409263	18409519	hsa-mir-3159	+	Pre-miRNA	hsa-mir-3159
chr11@18409378	0.07	chr11	18409263	18409519	hsa-mir-3159	+	Pre-miRNA	hsa-mir-3159
chr11@18409382	0.41	chr11	18409263	18409519	hsa-mir-3159	+	Pre-miRNA	hsa-mir-3159
chr11@18409389	0.64	chr11	18409263	18409519	hsa-mir-3159	+	Pre-miRNA	hsa-mir-3159
chr11@18409391	0.21	chr11	18409263	18409519	hsa-mir-3159	+	Pre-miRNA	hsa-mir-3159
chr11@18409402	0.7	chr11	18409263	18409519	hsa-mir-3159	+	Pre-miRNA	hsa-mir-3159
chr11@18409403	0.66	chr11	18409263	18409519	hsa-mir-3159	+	Pre-miRNA	hsa-mir-3159
chr11@18409404	0.69	chr11	18409263	18409519	hsa-mir-3159	+	Pre-miRNA	hsa-mir-3159
chr11@18409405	0.18	chr11	18409263	18409519	hsa-mir-3159	+	Pre-miRNA	hsa-mir-3159
chr11@18409422	0.64	chr11	18409263	18409519	hsa-mir-3159	+	Pre-miRNA flanking region
chr11@18409426	0.04	chr11	18409263	18409519	hsa-mir-3159	+	Pre-miRNA flanking region
chr11@18409442	0.05	chr11	18409263	18409519	hsa-mir-3159	+	Pre-miRNA flanking region
chr11@18409451	0.11	chr11	18409263	18409519	hsa-mir-3159	+	Pre-miRNA flanking region
chr11@18409454	0.6	chr11	18409263	18409519	hsa-mir-3159	+	Pre-miRNA flanking region
chr11@18409463	0.04	chr11	18409263	18409519	hsa-mir-3159	+	Pre-miRNA flanking region
chr11@18409466	0.62	chr11	18409263	18409519	hsa-mir-3159	+	Pre-miRNA flanking region
chr11@18409473	0.13	chr11	18409263	18409519	hsa-mir-3159	+	Pre-miRNA flanking region
chr11@18409476	0.05	chr11	18409263	18409519	hsa-mir-3159	+	Pre-miRNA flanking region
chr11@18409478	0.15	chr11	18409263	18409519	hsa-mir-3159	+	Pre-miRNA flanking region
chr11@18409480	0.46	chr11	18409263	18409519	hsa-mir-3159	+	Pre-miRNA flanking region
chr11@18409483	0.53	chr11	18409263	18409519	hsa-mir-3159	+	Pre-miRNA flanking region
chr11@18409489	0.63	chr11	18409263	18409519	hsa-mir-3159	+	Pre-miRNA flanking region
chr11@18409499	0.12	chr11	18409263	18409519	hsa-mir-3159	+	Pre-miRNA flanking region
chr11@93466903	0.07	chr11	93466743	93466990	hsa-mir-1304	-	Pre-miRNA	hsa-mir-1304
chr12@109230757	0.03	chr12	109230609	109230842	hsa-mir-619	-	Pre-miRNA	hsa-mir-619
chr12@109230792	0.03	chr12	109230609	109230842	hsa-mir-619	-	Pre-miRNA flanking region
chr12@116866007	0.13	chr12	116865986	116866176	hsa-mir-4472-2	-	Pre-miRNA flanking region
chr12@116866012	0.03	chr12	116865986	116866176	hsa-mir-4472-2	-	Pre-miRNA flanking region
chr12@116866013	0.42	chr12	116865986	116866176	hsa-mir-4472-2	-	Pre-miRNA flanking region
chr12@116866017	0.35	chr12	116865986	116866176	hsa-mir-4472-2	-	Pre-miRNA flanking region
chr12@116866020	0.14	chr12	116865986	116866176	hsa-mir-4472-2	-	Pre-miRNA flanking region
chr12@116866026	0.06	chr12	116865986	116866176	hsa-mir-4472-2	-	Pre-miRNA flanking region
chr12@116866033	0.1	chr12	116865986	116866176	hsa-mir-4472-2	-	Pre-miRNA flanking region
chr12@116866037	0.35	chr12	116865986	116866176	hsa-mir-4472-2	-	Pre-miRNA flanking region
chr12@116866052	0.06	chr12	116865986	116866176	hsa-mir-4472-2	-	Pre-miRNA flanking region
chr12@116866057	0.02	chr12	116865986	116866176	hsa-mir-4472-2	-	Pre-miRNA	hsa-mir-4472-2
chr12@116866076	0.09	chr12	116865986	116866176	hsa-mir-4472-2	-	Pre-miRNA	hsa-mir-4472-2
chr12@116866079	0.09	chr12	116865986	116866176	hsa-mir-4472-2	-	Pre-miRNA	hsa-mir-4472-2
chr12@116866080	0.13	chr12	116865986	116866176	hsa-mir-4472-2	-	Pre-miRNA	hsa-mir-4472-2
chr12@116866092	0.15	chr12	116865986	116866176	hsa-mir-4472-2	-	Pre-miRNA	hsa-mir-4472-2
chr12@116866094	0.02	chr12	116865986	116866176	hsa-mir-4472-2	-	Pre-miRNA	hsa-mir-4472-2
chr12@116866096	0.08	chr12	116865986	116866176	hsa-mir-4472-2	-	Pre-miRNA	hsa-mir-4472-2
chr12@116866099	0.03	chr12	116865986	116866176	hsa-mir-4472-2	-	Pre-miRNA	hsa-mir-4472-2
chr12@116866100	0.03	chr12	116865986	116866176	hsa-mir-4472-2	-	Pre-miRNA	hsa-mir-4472-2
chr12@116866101	0.07	chr12	116865986	116866176	hsa-mir-4472-2	-	Pre-miRNA	hsa-mir-4472-2
chr12@116866102	0.02	chr12	116865986	116866176	hsa-mir-4472-2	-	Pre-miRNA	hsa-mir-4472-2
chr12@116866104	0.02	chr12	116865986	116866176	hsa-mir-4472-2	-	Pre-miRNA	hsa-mir-4472-2
chr12@116866105	0.08	chr12	116865986	116866176	hsa-mir-4472-2	-	Pre-miRNA	hsa-mir-4472-2
chr12@128729069	0.03	chr12	128728992	128729189	hsa-mir-4419b	+	Pre-miRNA	hsa-mir-4419b
chr12@128729168	0.04	chr12	128728992	128729189	hsa-mir-4419b	+	Pre-miRNA flanking region
chr13@115039243	0.02	chr13	115039198	115039428	hsa-mir-4502	+	Pre-miRNA flanking region
chr13@115039245	0.03	chr13	115039198	115039428	hsa-mir-4502	+	Pre-miRNA flanking region
chr15@22513214	0.04	chr15	22513166	22513341	hsa-mir-1268a	-	Pre-miRNA flanking region
chr15@22513227	0.04	chr15	22513166	22513341	hsa-mir-1268a	-	Pre-miRNA flanking region
chr15@22513232	0.13	chr15	22513166	22513341	hsa-mir-1268a	-	Pre-miRNA	hsa-mir-1268a
chr15@22513241	0.04	chr15	22513166	22513341	hsa-mir-1268a	-	Pre-miRNA	hsa-mir-1268a
chr15@22513244	0.04	chr15	22513166	22513341	hsa-mir-1268a	-	Pre-miRNA	hsa-mir-1268a
chr15@22513251	0.04	chr15	22513166	22513341	hsa-mir-1268a	-	Pre-miRNA	hsa-mir-1268a
chr15@22513254	0.05	chr15	22513166	22513341	hsa-mir-1268a	-	Pre-miRNA	hsa-mir-1268a
chr15@22513281	0.07	chr15	22513166	22513341	hsa-mir-1268a	-	Pre-miRNA flanking region
chr15@66789254	0.03	chr15	66789217	66789408	hsa-mir-4512	-	Pre-miRNA flanking region
chr15@66789270	0.05	chr15	66789217	66789408	hsa-mir-4512	-	Pre-miRNA flanking region
chr15@66789279	0.04	chr15	66789217	66789408	hsa-mir-4512	-	Pre-miRNA flanking region
chr15@66789284	0.03	chr15	66789217	66789408	hsa-mir-4512	-	Pre-miRNA flanking region
chr15@66789343	0.02	chr15	66789217	66789408	hsa-mir-4512	-	Pre-miRNA	hsa-mir-4512
chr17@78072526	0.05	chr17	78072503	78072774	hsa-mir-1268b	+	Pre-miRNA flanking region
chr17@78072533	0.03	chr17	78072503	78072774	hsa-mir-1268b	+	Pre-miRNA flanking region
chr17@78072546	0.03	chr17	78072503	78072774	hsa-mir-1268b	+	Pre-miRNA flanking region
chr17@78072568	0.03	chr17	78072503	78072774	hsa-mir-1268b	+	Pre-miRNA flanking region
chr17@78072570	0.04	chr17	78072503	78072774	hsa-mir-1268b	+	Pre-miRNA flanking region
chr17@78072603	0.03	chr17	78072503	78072774	hsa-mir-1268b	+	Pre-miRNA flanking region
chr17@78072614	0.02	chr17	78072503	78072774	hsa-mir-1268b	+	Pre-miRNA flanking region
chr17@78072619	0.03	chr17	78072503	78072774	hsa-mir-1268b	+	Pre-miRNA flanking region
chr17@78072621	0.05	chr17	78072503	78072774	hsa-mir-1268b	+	Pre-miRNA flanking region
chr17@78072636	0.02	chr17	78072503	78072774	hsa-mir-1268b	+	Pre-miRNA	hsa-mir-1268b
chr17@78072648	0.07	chr17	78072503	78072774	hsa-mir-1268b	+	Pre-miRNA	hsa-mir-1268b
chr17@78072656	0.05	chr17	78072503	78072774	hsa-mir-1268b	+	Pre-miRNA	hsa-mir-1268b
chr17@78072658	0.04	chr17	78072503	78072774	hsa-mir-1268b	+	Pre-miRNA	hsa-mir-1268b
chr17@78072661	0.04	chr17	78072503	78072774	hsa-mir-1268b	+	Pre-miRNA	hsa-mir-1268b
chr17@78072662	0.1	chr17	78072503	78072774	hsa-mir-1268b	+	Pre-miRNA	hsa-mir-1268b
chr17@78072668	0.03	chr17	78072503	78072774	hsa-mir-1268b	+	Pre-miRNA	hsa-mir-1268b
chr17@78072672	0.03	chr17	78072503	78072774	hsa-mir-1268b	+	Pre-miRNA	hsa-mir-1268b
chr17@78072697	0.03	chr17	78072503	78072774	hsa-mir-1268b	+	Pre-miRNA flanking region
chr17@78072717	0.02	chr17	78072503	78072774	hsa-mir-1268b	+	Pre-miRNA flanking region
chr17@78072723	0.03	chr17	78072503	78072774	hsa-mir-1268b	+	Pre-miRNA flanking region
chr17@78072725	0.03	chr17	78072503	78072774	hsa-mir-1268b	+	Pre-miRNA flanking region
chr17@78072733	0.04	chr17	78072503	78072774	hsa-mir-1268b	+	Pre-miRNA flanking region
chr17@78072734	0.03	chr17	78072503	78072774	hsa-mir-1268b	+	Pre-miRNA flanking region
chr17@78072736	0.03	chr17	78072503	78072774	hsa-mir-1268b	+	Pre-miRNA flanking region
chr17@78072741	0.03	chr17	78072503	78072774	hsa-mir-1268b	+	Pre-miRNA flanking region
chr17@78072747	0.02	chr17	78072503	78072774	hsa-mir-1268b	+	Pre-miRNA flanking region
chr18@33514025	0.03	chr18	33513998	33514180	hsa-mir-3929	-	Pre-miRNA flanking region
chr18@33514037	0.02	chr18	33513998	33514180	hsa-mir-3929	-	Pre-miRNA flanking region
chr18@33514038	0.05	chr18	33513998	33514180	hsa-mir-3929	-	Pre-miRNA flanking region
chr18@33514063	0.06	chr18	33513998	33514180	hsa-mir-3929	-	Pre-miRNA	hsa-mir-3929
chr18@33514077	0.04	chr18	33513998	33514180	hsa-mir-3929	-	Pre-miRNA	hsa-mir-3929
chr18@33514078	0.05	chr18	33513998	33514180	hsa-mir-3929	-	Pre-miRNA	hsa-mir-3929
chr18@33514087	0.06	chr18	33513998	33514180	hsa-mir-3929	-	Pre-miRNA	hsa-mir-3929
chr18@33514090	0.03	chr18	33513998	33514180	hsa-mir-3929	-	Pre-miRNA	hsa-mir-3929
chr18@33514099	0.04	chr18	33513998	33514180	hsa-mir-3929	-	Pre-miRNA	hsa-mir-3929
chr18@33514103	0.04	chr18	33513998	33514180	hsa-mir-3929	-	Pre-miRNA	hsa-mir-3929
chr18@33514108	0.03	chr18	33513998	33514180	hsa-mir-3929	-	Pre-miRNA flanking region
chr19@12897938	0.03	chr19	12897918	12898086	hsa-mir-5684	+	Pre-miRNA flanking region
chr19@12897944	0.07	chr19	12897918	12898086	hsa-mir-5684	+	Pre-miRNA	hsa-mir-5684
chr19@12897949	0.04	chr19	12897918	12898086	hsa-mir-5684	+	Pre-miRNA	hsa-mir-5684
chr19@12897951	0.89	chr19	12897918	12898086	hsa-mir-5684	+	Pre-miRNA	hsa-mir-5684
chr19@12897956	0.04	chr19	12897918	12898086	hsa-mir-5684	+	Pre-miRNA	hsa-mir-5684
chr19@12897968	0.16	chr19	12897918	12898086	hsa-mir-5684	+	Pre-miRNA	hsa-mir-5684
chr19@12897976	0.09	chr19	12897918	12898086	hsa-mir-5684	+	Pre-miRNA	hsa-mir-5684
chr19@12897981	0.02	chr19	12897918	12898086	hsa-mir-5684	+	Pre-miRNA	hsa-mir-5684
chr19@12897982	0.03	chr19	12897918	12898086	hsa-mir-5684	+	Pre-miRNA	hsa-mir-5684
chr19@12897984	0.11	chr19	12897918	12898086	hsa-mir-5684	+	Pre-miRNA	hsa-mir-5684
chr19@12897986	0.02	chr19	12897918	12898086	hsa-mir-5684	+	Pre-miRNA	hsa-mir-5684
chr19@12897987	0.05	chr19	12897918	12898086	hsa-mir-5684	+	Pre-miRNA	hsa-mir-5684
chr19@12897996	0.21	chr19	12897918	12898086	hsa-mir-5684	+	Pre-miRNA	hsa-mir-5684
chr19@12898006	0.07	chr19	12897918	12898086	hsa-mir-5684	+	Pre-miRNA	hsa-mir-5684
chr19@12898014	0.09	chr19	12897918	12898086	hsa-mir-5684	+	Pre-miRNA flanking region
chr19@12898017	0.88	chr19	12897918	12898086	hsa-mir-5684	+	Pre-miRNA flanking region
chr19@12898021	0.05	chr19	12897918	12898086	hsa-mir-5684	+	Pre-miRNA flanking region
chr19@12898024	0.08	chr19	12897918	12898086	hsa-mir-5684	+	Pre-miRNA flanking region
chr19@12898026	0.11	chr19	12897918	12898086	hsa-mir-5684	+	Pre-miRNA flanking region
chr19@12898029	0.03	chr19	12897918	12898086	hsa-mir-5684	+	Pre-miRNA flanking region
chr19@12898032	0.06	chr19	12897918	12898086	hsa-mir-5684	+	Pre-miRNA flanking region
chr19@12898035	0.12	chr19	12897918	12898086	hsa-mir-5684	+	Pre-miRNA flanking region
chr19@12898045	0.22	chr19	12897918	12898086	hsa-mir-5684	+	Pre-miRNA flanking region
chr19@12898046	0.11	chr19	12897918	12898086	hsa-mir-5684	+	Pre-miRNA flanking region
chr19@12898052	0.76	chr19	12897918	12898086	hsa-mir-5684	+	Pre-miRNA flanking region
chr19@12898056	0.1	chr19	12897918	12898086	hsa-mir-5684	+	Pre-miRNA flanking region
chr19@12898062	0.95	chr19	12897918	12898086	hsa-mir-5684	+	Pre-miRNA flanking region
chr19@45939935	0.02	chr19	45939873	45940039	hsa-mir-6088	+	Pre-miRNA	hsa-mir-6088
chr19@45939937	0.42	chr19	45939873	45940039	hsa-mir-6088	+	Pre-miRNA	hsa-mir-6088
chr19@45939938	0.45	chr19	45939873	45940039	hsa-mir-6088	+	Pre-miRNA	hsa-mir-6088
chr19@45939941	0.12	chr19	45939873	45940039	hsa-mir-6088	+	Pre-miRNA	hsa-mir-6088
chr19@45939943	0.35	chr19	45939873	45940039	hsa-mir-6088	+	Pre-miRNA	hsa-mir-6088
chr19@45939945	0.38	chr19	45939873	45940039	hsa-mir-6088	+	Pre-miRNA	hsa-mir-6088
chr19@45939950	0.88	chr19	45939873	45940039	hsa-mir-6088	+	Pre-miRNA	hsa-mir-6088
chr19@45939955	0.14	chr19	45939873	45940039	hsa-mir-6088	+	Pre-miRNA	hsa-mir-6088
chr19@45939958	0.09	chr19	45939873	45940039	hsa-mir-6088	+	Pre-miRNA	hsa-mir-6088
chr19@45939960	0.06	chr19	45939873	45940039	hsa-mir-6088	+	Pre-miRNA	hsa-mir-6088
chr19@45939966	0.04	chr19	45939873	45940039	hsa-mir-6088	+	Pre-miRNA flanking region
chr19@45939969	0.08	chr19	45939873	45940039	hsa-mir-6088	+	Pre-miRNA flanking region
chr19@45939974	0.04	chr19	45939873	45940039	hsa-mir-6088	+	Pre-miRNA flanking region
chr19@45939975	0.07	chr19	45939873	45940039	hsa-mir-6088	+	Pre-miRNA flanking region
chr19@45939980	0.05	chr19	45939873	45940039	hsa-mir-6088	+	Pre-miRNA flanking region
chr19@45939981	0.03	chr19	45939873	45940039	hsa-mir-6088	+	Pre-miRNA flanking region
chr19@45939988	0.17	chr19	45939873	45940039	hsa-mir-6088	+	Pre-miRNA flanking region
chr19@45939996	0.11	chr19	45939873	45940039	hsa-mir-6088	+	Pre-miRNA flanking region
chr19@45939997	0.46	chr19	45939873	45940039	hsa-mir-6088	+	Pre-miRNA flanking region
chr19@45940002	0.03	chr19	45939873	45940039	hsa-mir-6088	+	Pre-miRNA flanking region
chr19@45940013	0.11	chr19	45939873	45940039	hsa-mir-6088	+	Pre-miRNA flanking region
chr19@45940018	0.8	chr19	45939873	45940039	hsa-mir-6088	+	Pre-miRNA flanking region
chr19@45940019	0.79	chr19	45939873	45940039	hsa-mir-6088	+	Pre-miRNA flanking region
chr19@47212664	0.03	chr19	47212521	47212777	hsa-mir-320e	-	Pre-miRNA flanking region
chr19@47212723	0.03	chr19	47212521	47212777	hsa-mir-320e	-	Pre-miRNA flanking region
chr19@54244454	0.26	chr19	54244428	54244705	hsa-mir-517c	+	Pre-miRNA flanking region
chr19@54244472	0.25	chr19	54244428	54244705	hsa-mir-517c	+	Pre-miRNA flanking region
chr19@54244473	0.18	chr19	54244428	54244705	hsa-mir-517c	+	Pre-miRNA flanking region
chr19@54244485	0.04	chr19	54244428	54244705	hsa-mir-517c	+	Pre-miRNA flanking region
chr1@10287734	0.03	chr1	10287713	10287897	hsa-mir-1273d	+	Pre-miRNA flanking region
chr1@10287744	0.02	chr1	10287713	10287897	hsa-mir-1273d	+	Pre-miRNA flanking region
chr1@10287797	0.02	chr1	10287713	10287897	hsa-mir-1273d	+	Pre-miRNA	hsa-mir-1273d
chr1@10287798	0.03	chr1	10287713	10287897	hsa-mir-1273d	+	Pre-miRNA	hsa-mir-1273d
chr1@10287804	0.04	chr1	10287713	10287897	hsa-mir-1273d	+	Pre-miRNA	hsa-mir-1273d
chr1@10287809	0.02	chr1	10287713	10287897	hsa-mir-1273d	+	Pre-miRNA	hsa-mir-1273d
chr1@10287860	0.11	chr1	10287713	10287897	hsa-mir-1273d	+	Pre-miRNA	hsa-mir-1273d
chr1@10287865	0.05	chr1	10287713	10287897	hsa-mir-1273d	+	Pre-miRNA flanking region
chr1@22959713	0.07	chr1	22959693	22959922	hsa-mir-6127	-	Pre-miRNA flanking region
chr1@22959728	0.03	chr1	22959693	22959922	hsa-mir-6127	-	Pre-miRNA flanking region
chr1@22959730	0.04	chr1	22959693	22959922	hsa-mir-6127	-	Pre-miRNA flanking region
chr1@22959732	0.08	chr1	22959693	22959922	hsa-mir-6127	-	Pre-miRNA flanking region
chr1@22959750	0.16	chr1	22959693	22959922	hsa-mir-6127	-	Pre-miRNA flanking region
chr1@22959753	0.28	chr1	22959693	22959922	hsa-mir-6127	-	Pre-miRNA	hsa-mir-6127
chr1@22959757	0.07	chr1	22959693	22959922	hsa-mir-6127	-	Pre-miRNA	hsa-mir-6127
chr1@22959759	0.21	chr1	22959693	22959922	hsa-mir-6127	-	Pre-miRNA	hsa-mir-6127
chr1@22959760	0.03	chr1	22959693	22959922	hsa-mir-6127	-	Pre-miRNA	hsa-mir-6127
chr1@23384316	0.07	chr1	23384208	23384479	hsa-mir-4419a	-	Pre-miRNA flanking region
chr1@23384318	0.06	chr1	23384208	23384479	hsa-mir-4419a	-	Pre-miRNA flanking region
chr1@23384320	0.02	chr1	23384208	23384479	hsa-mir-4419a	-	Pre-miRNA flanking region
chr1@23384322	0.04	chr1	23384208	23384479	hsa-mir-4419a	-	Pre-miRNA flanking region
chr1@23384336	0.03	chr1	23384208	23384479	hsa-mir-4419a	-	Pre-miRNA flanking region
chr1@23384340	0.02	chr1	23384208	23384479	hsa-mir-4419a	-	Pre-miRNA flanking region
chr1@23384347	0.05	chr1	23384208	23384479	hsa-mir-4419a	-	Pre-miRNA flanking region
chr1@53394368	0.03	chr1	53394320	53394506	hsa-mir-1273f	+	Pre-miRNA	hsa-mir-1273f
chr1@53394375	0.06	chr1	53394320	53394506	hsa-mir-1273f	+	Pre-miRNA	hsa-mir-1273f
chr1@53394381	0.03	chr1	53394320	53394506	hsa-mir-1273f	+	Pre-miRNA	hsa-mir-1273f
chr1@53394406	0.03	chr1	53394320	53394506	hsa-mir-1273f	+	Pre-miRNA	hsa-mir-1273f
chr1@53394431	0.02	chr1	53394320	53394506	hsa-mir-1273f	+	Pre-miRNA	hsa-mir-1273f
chr1@53394438	0.04	chr1	53394320	53394506	hsa-mir-1273f	+	Pre-miRNA	hsa-mir-1273f
chr1@53394439	0.08	chr1	53394320	53394506	hsa-mir-1273f	+	Pre-miRNA	hsa-mir-1273f
chr1@53394441	0.02	chr1	53394320	53394506	hsa-mir-1273f	+	Pre-miRNA	hsa-mir-1273f
chr1@53394443	0.02	chr1	53394320	53394506	hsa-mir-1273f	+	Pre-miRNA	hsa-mir-1273f
chr2@33643565	0.09	chr2	33643524	33643702	hsa-mir-4430	+	Pre-miRNA flanking region
chr2@33643595	0.54	chr2	33643524	33643702	hsa-mir-4430	+	Pre-miRNA	hsa-mir-4430
chr2@33643605	0.09	chr2	33643524	33643702	hsa-mir-4430	+	Pre-miRNA	hsa-mir-4430
chr2@33643614	0.2	chr2	33643524	33643702	hsa-mir-4430	+	Pre-miRNA	hsa-mir-4430
chr2@33643644	0.11	chr2	33643524	33643702	hsa-mir-4430	+	Pre-miRNA flanking region
chr2@33643647	0.06	chr2	33643524	33643702	hsa-mir-4430	+	Pre-miRNA flanking region
chr3@20179034	0.06	chr3	20178979	20179174	hsa-mir-3135a	+	Pre-miRNA flanking region
chr3@20179035	0.11	chr3	20178979	20179174	hsa-mir-3135a	+	Pre-miRNA flanking region
chr3@20179036	0.05	chr3	20178979	20179174	hsa-mir-3135a	+	Pre-miRNA flanking region
chr3@20179075	0.06	chr3	20178979	20179174	hsa-mir-3135a	+	Pre-miRNA	hsa-mir-3135a
chr3@20179089	0.03	chr3	20178979	20179174	hsa-mir-3135a	+	Pre-miRNA	hsa-mir-3135a
chr3@20179137	0.04	chr3	20178979	20179174	hsa-mir-3135a	+	Pre-miRNA flanking region
chr4@79741982	0.04	chr4	79741872	79742121	hsa-mir-5096	+	Pre-miRNA flanking region
chr4@87463587	0.04	chr4	87463526	87463815	hsa-mir-4452	-	Pre-miRNA flanking region
chr4@87463591	0.02	chr4	87463526	87463815	hsa-mir-4452	-	Pre-miRNA flanking region
chr4@87463601	0.03	chr4	87463526	87463815	hsa-mir-4452	-	Pre-miRNA flanking region
chr4@87463613	0.02	chr4	87463526	87463815	hsa-mir-4452	-	Pre-miRNA flanking region
chr4@87463632	0.09	chr4	87463526	87463815	hsa-mir-4452	-	Pre-miRNA flanking region
chr4@87463638	0.05	chr4	87463526	87463815	hsa-mir-4452	-	Pre-miRNA	hsa-mir-4452
chr4@87463651	0.02	chr4	87463526	87463815	hsa-mir-4452	-	Pre-miRNA	hsa-mir-4452
chr4@87463652	0.03	chr4	87463526	87463815	hsa-mir-4452	-	Pre-miRNA	hsa-mir-4452
chr4@87463659	0.24	chr4	87463526	87463815	hsa-mir-4452	-	Pre-miRNA	hsa-mir-4452
chr4@87463660	0.03	chr4	87463526	87463815	hsa-mir-4452	-	Pre-miRNA	hsa-mir-4452
chr4@87463676	0.07	chr4	87463526	87463815	hsa-mir-4452	-	Pre-miRNA	hsa-mir-4452
chr4@87463696	0.03	chr4	87463526	87463815	hsa-mir-4452	-	Pre-miRNA	hsa-mir-4452
chr4@87463720	0.03	chr4	87463526	87463815	hsa-mir-4452	-	Pre-miRNA flanking region
chr4@87463721	0.18	chr4	87463526	87463815	hsa-mir-4452	-	Pre-miRNA flanking region
chr4@87463727	0.03	chr4	87463526	87463815	hsa-mir-4452	-	Pre-miRNA flanking region
chr4@87463732	0.03	chr4	87463526	87463815	hsa-mir-4452	-	Pre-miRNA flanking region
chr4@87463737	0.03	chr4	87463526	87463815	hsa-mir-4452	-	Pre-miRNA flanking region
chr4@87463752	0.04	chr4	87463526	87463815	hsa-mir-4452	-	Pre-miRNA flanking region
chr4@87463764	0.03	chr4	87463526	87463815	hsa-mir-4452	-	Pre-miRNA flanking region
chr4@87463765	0.04	chr4	87463526	87463815	hsa-mir-4452	-	Pre-miRNA flanking region
chr4@87463772	0.03	chr4	87463526	87463815	hsa-mir-4452	-	Pre-miRNA flanking region
chr4@87463773	0.03	chr4	87463526	87463815	hsa-mir-4452	-	Pre-miRNA flanking region
chr4@87463774	0.12	chr4	87463526	87463815	hsa-mir-4452	-	Pre-miRNA flanking region
chr5@154065313	0.1	chr5	154065294	154065480	hsa-mir-1303	+	Pre-miRNA flanking region
chr5@154065314	0.03	chr5	154065294	154065480	hsa-mir-1303	+	Pre-miRNA flanking region
chr5@154065326	0.04	chr5	154065294	154065480	hsa-mir-1303	+	Pre-miRNA flanking region
chr5@154065328	0.05	chr5	154065294	154065480	hsa-mir-1303	+	Pre-miRNA flanking region
chr5@154065339	0.16	chr5	154065294	154065480	hsa-mir-1303	+	Pre-miRNA	hsa-mir-1303
chr5@154065365	0.07	chr5	154065294	154065480	hsa-mir-1303	+	Pre-miRNA	hsa-mir-1303
chr5@154065377	0.02	chr5	154065294	154065480	hsa-mir-1303	+	Pre-miRNA	hsa-mir-1303
chr5@154065387	0.05	chr5	154065294	154065480	hsa-mir-1303	+	Pre-miRNA	hsa-mir-1303
chr5@154065400	0.03	chr5	154065294	154065480	hsa-mir-1303	+	Pre-miRNA	hsa-mir-1303
chr5@154065403	0.1	chr5	154065294	154065480	hsa-mir-1303	+	Pre-miRNA	hsa-mir-1303
chr5@154065406	0.04	chr5	154065294	154065480	hsa-mir-1303	+	Pre-miRNA	hsa-mir-1303
chr5@53371359	0.03	chr5	53371250	53371520	hsa-mir-4459	-	Pre-miRNA	hsa-mir-4459
chr5@53371421	0.05	chr5	53371250	53371520	hsa-mir-4459	-	Pre-miRNA flanking region
chr5@53371472	0.03	chr5	53371250	53371520	hsa-mir-4459	-	Pre-miRNA flanking region
chr6@10439922	0.34	chr6	10439888	10440070	hsa-mir-5689	+	Pre-miRNA flanking region
chr6@10439962	0.04	chr6	10439888	10440070	hsa-mir-5689	+	Pre-miRNA	hsa-mir-5689
chr6@10439973	0.06	chr6	10439888	10440070	hsa-mir-5689	+	Pre-miRNA	hsa-mir-5689
chr6@10439976	0.63	chr6	10439888	10440070	hsa-mir-5689	+	Pre-miRNA	hsa-mir-5689
chr6@10439980	0.63	chr6	10439888	10440070	hsa-mir-5689	+	Pre-miRNA	hsa-mir-5689
chr6@10439983	0.16	chr6	10439888	10440070	hsa-mir-5689	+	Pre-miRNA	hsa-mir-5689
chr6@10439992	0.03	chr6	10439888	10440070	hsa-mir-5689	+	Pre-miRNA	hsa-mir-5689
chr6@10440027	0.07	chr6	10439888	10440070	hsa-mir-5689	+	Pre-miRNA	hsa-mir-5689
chr6@155174458	0.03	chr6	155174411	155174595	hsa-mir-1273c	+	Pre-miRNA flanking region
chr6@155174477	0.02	chr6	155174411	155174595	hsa-mir-1273c	+	Pre-miRNA flanking region
chr6@155174480	0.03	chr6	155174411	155174595	hsa-mir-1273c	+	Pre-miRNA flanking region
chr6@155174489	0.02	chr6	155174411	155174595	hsa-mir-1273c	+	Pre-miRNA flanking region
chr6@155174521	0.03	chr6	155174411	155174595	hsa-mir-1273c	+	Pre-miRNA	hsa-mir-1273c
chr6@155174525	0.02	chr6	155174411	155174595	hsa-mir-1273c	+	Pre-miRNA	hsa-mir-1273c
chr6@155174526	0.04	chr6	155174411	155174595	hsa-mir-1273c	+	Pre-miRNA	hsa-mir-1273c
chr6@155174537	0.03	chr6	155174411	155174595	hsa-mir-1273c	+	Pre-miRNA	hsa-mir-1273c
chr6@155174547	0.03	chr6	155174411	155174595	hsa-mir-1273c	+	Pre-miRNA	hsa-mir-1273c
chr6@32717651	0.08	chr6	32717626	32717863	hsa-mir-3135b	-	Pre-miRNA flanking region
chr6@32717662	0.08	chr6	32717626	32717863	hsa-mir-3135b	-	Pre-miRNA flanking region
chr6@32717668	0.03	chr6	32717626	32717863	hsa-mir-3135b	-	Pre-miRNA flanking region
chr6@32717672	0.1	chr6	32717626	32717863	hsa-mir-3135b	-	Pre-miRNA flanking region
chr6@32717675	0.1	chr6	32717626	32717863	hsa-mir-3135b	-	Pre-miRNA flanking region
chr6@32717678	0.75	chr6	32717626	32717863	hsa-mir-3135b	-	Pre-miRNA flanking region
chr6@32717714	0.1	chr6	32717626	32717863	hsa-mir-3135b	-	Pre-miRNA	hsa-mir-3135b
chr6@32717721	0.08	chr6	32717626	32717863	hsa-mir-3135b	-	Pre-miRNA	hsa-mir-3135b
chr6@32717725	0.07	chr6	32717626	32717863	hsa-mir-3135b	-	Pre-miRNA	hsa-mir-3135b
chr6@32717733	0.11	chr6	32717626	32717863	hsa-mir-3135b	-	Pre-miRNA	hsa-mir-3135b
chr6@32717747	0.03	chr6	32717626	32717863	hsa-mir-3135b	-	Pre-miRNA	hsa-mir-3135b
chr6@32717757	0.48	chr6	32717626	32717863	hsa-mir-3135b	-	Pre-miRNA flanking region
chr6@32717759	0.07	chr6	32717626	32717863	hsa-mir-3135b	-	Pre-miRNA flanking region
chr6@32717761	0.04	chr6	32717626	32717863	hsa-mir-3135b	-	Pre-miRNA flanking region
chr6@32717765	0.02	chr6	32717626	32717863	hsa-mir-3135b	-	Pre-miRNA flanking region
chr6@32717767	0.14	chr6	32717626	32717863	hsa-mir-3135b	-	Pre-miRNA flanking region
chr7@91833321	0.03	chr7	91833226	91833507	hsa-mir-1285-1	-	Pre-miRNA flanking region
chr7@91833323	0.02	chr7	91833226	91833507	hsa-mir-1285-1	-	Pre-miRNA flanking region
chr7@91833334	0.04	chr7	91833226	91833507	hsa-mir-1285-1	-	Pre-miRNA	hsa-mir-1285-1
chr7@91833336	0.05	chr7	91833226	91833507	hsa-mir-1285-1	-	Pre-miRNA	hsa-mir-1285-1
chr7@91833340	0.02	chr7	91833226	91833507	hsa-mir-1285-1	-	Pre-miRNA	hsa-mir-1285-1
chr7@91833341	0.03	chr7	91833226	91833507	hsa-mir-1285-1	-	Pre-miRNA	hsa-mir-1285-1
chr7@91833374	0.03	chr7	91833226	91833507	hsa-mir-1285-1	-	Pre-miRNA	hsa-mir-1285-1
chr7@91833391	0.03	chr7	91833226	91833507	hsa-mir-1285-1	-	Pre-miRNA	hsa-mir-1285-1
chr7@91833393	0.05	chr7	91833226	91833507	hsa-mir-1285-1	-	Pre-miRNA	hsa-mir-1285-1
chr7@91833419	0.03	chr7	91833226	91833507	hsa-mir-1285-1	-	Pre-miRNA flanking region
chr8@27559173	0.03	chr8	27559142	27559325	hsa-mir-3622a	+	Pre-miRNA flanking region
chr8@27559181	0.02	chr8	27559142	27559325	hsa-mir-3622a	+	Pre-miRNA flanking region
chr8@27559186	0.04	chr8	27559142	27559325	hsa-mir-3622a	+	Pre-miRNA flanking region
chr10@100684264	0.04	chr10	100684229	100684470	hsa-mir-6507	-	Pre-miRNA	hsa-mir-6507
chr10@100684266	0.23	chr10	100684229	100684470	hsa-mir-6507	-	Pre-miRNA	hsa-mir-6507
chr10@100684271	0.02	chr10	100684229	100684470	hsa-mir-6507	-	Pre-miRNA	hsa-mir-6507
chr10@100684272	0.03	chr10	100684229	100684470	hsa-mir-6507	-	Pre-miRNA	hsa-mir-6507
chr10@100684287	0.06	chr10	100684229	100684470	hsa-mir-6507	-	Pre-miRNA	hsa-mir-6507
chr10@100684292	0.03	chr10	100684229	100684470	hsa-mir-6507	-	Pre-miRNA	hsa-mir-6507
chr10@100684295	0.06	chr10	100684229	100684470	hsa-mir-6507	-	Pre-miRNA	hsa-mir-6507
chr10@100684297	0.04	chr10	100684229	100684470	hsa-mir-6507	-	Pre-miRNA	hsa-mir-6507
chr10@100684303	0.03	chr10	100684229	100684470	hsa-mir-6507	-	Pre-miRNA	hsa-mir-6507
chr10@100684304	0.04	chr10	100684229	100684470	hsa-mir-6507	-	Pre-miRNA	hsa-mir-6507
chr10@100684333	0.03	chr10	100684229	100684470	hsa-mir-6507	-	Pre-miRNA flanking region
chr10@100684335	0.06	chr10	100684229	100684470	hsa-mir-6507	-	Pre-miRNA flanking region
chr10@100684336	0.02	chr10	100684229	100684470	hsa-mir-6507	-	Pre-miRNA flanking region
chr10@100684343	0.04	chr10	100684229	100684470	hsa-mir-6507	-	Pre-miRNA flanking region
chr10@100684345	0.04	chr10	100684229	100684470	hsa-mir-6507	-	Pre-miRNA flanking region
chr10@100684349	0.05	chr10	100684229	100684470	hsa-mir-6507	-	Pre-miRNA flanking region
chr10@100684352	0.03	chr10	100684229	100684470	hsa-mir-6507	-	Pre-miRNA flanking region
chr10@100684381	0.02	chr10	100684229	100684470	hsa-mir-6507	-	Pre-miRNA flanking region
chr10@100684387	0.03	chr10	100684229	100684470	hsa-mir-6507	-	Pre-miRNA flanking region
chr10@100684389	0.04	chr10	100684229	100684470	hsa-mir-6507	-	Pre-miRNA flanking region
chr10@100684391	0.02	chr10	100684229	100684470	hsa-mir-6507	-	Pre-miRNA flanking region
chr10@100684393	0.02	chr10	100684229	100684470	hsa-mir-6507	-	Pre-miRNA flanking region
chr10@100684403	0.02	chr10	100684229	100684470	hsa-mir-6507	-	Pre-miRNA flanking region
chr10@100684411	0.05	chr10	100684229	100684470	hsa-mir-6507	-	Pre-miRNA flanking region
chr10@100684412	0.02	chr10	100684229	100684470	hsa-mir-6507	-	Pre-miRNA flanking region
chr10@100684419	0.03	chr10	100684229	100684470	hsa-mir-6507	-	Pre-miRNA flanking region
chr10@100684442	0.05	chr10	100684229	100684470	hsa-mir-6507	-	Pre-miRNA flanking region
chr10@112748624	0.03	chr10	112748564	112748802	hsa-mir-548e	+	Pre-miRNA flanking region
chr10@112748627	0.03	chr10	112748564	112748802	hsa-mir-548e	+	Pre-miRNA flanking region
chr10@112748632	0.02	chr10	112748564	112748802	hsa-mir-548e	+	Pre-miRNA flanking region
chr10@112748642	0.06	chr10	112748564	112748802	hsa-mir-548e	+	Pre-miRNA flanking region
chr10@112748646	0.02	chr10	112748564	112748802	hsa-mir-548e	+	Pre-miRNA flanking region
chr10@112748651	0.03	chr10	112748564	112748802	hsa-mir-548e	+	Pre-miRNA flanking region
chr10@112748660	0.06	chr10	112748564	112748802	hsa-mir-548e	+	Pre-miRNA flanking region
chr10@112748663	0.03	chr10	112748564	112748802	hsa-mir-548e	+	Pre-miRNA flanking region
chr10@112748664	0.03	chr10	112748564	112748802	hsa-mir-548e	+	Pre-miRNA flanking region
chr10@112748683	0.02	chr10	112748564	112748802	hsa-mir-548e	+	Pre-miRNA flanking region
chr10@112748696	0.03	chr10	112748564	112748802	hsa-mir-548e	+	Pre-miRNA	hsa-mir-548e
chr10@112748707	0.03	chr10	112748564	112748802	hsa-mir-548e	+	Pre-miRNA	hsa-mir-548e
chr10@112748720	0.05	chr10	112748564	112748802	hsa-mir-548e	+	Pre-miRNA	hsa-mir-548e
chr10@112748722	0.02	chr10	112748564	112748802	hsa-mir-548e	+	Pre-miRNA	hsa-mir-548e
chr10@112748726	0.03	chr10	112748564	112748802	hsa-mir-548e	+	Pre-miRNA	hsa-mir-548e
chr10@112748751	0.03	chr10	112748564	112748802	hsa-mir-548e	+	Pre-miRNA	hsa-mir-548e
chr10@12172753	0.84	chr10	12172682	12172856	hsa-mir-548ak	-	Pre-miRNA flanking region
chr10@12172763	0.04	chr10	12172682	12172856	hsa-mir-548ak	-	Pre-miRNA	hsa-mir-548ak
chr10@12172765	0.03	chr10	12172682	12172856	hsa-mir-548ak	-	Pre-miRNA	hsa-mir-548ak
chr10@12172766	0.02	chr10	12172682	12172856	hsa-mir-548ak	-	Pre-miRNA	hsa-mir-548ak
chr10@12172782	0.02	chr10	12172682	12172856	hsa-mir-548ak	-	Pre-miRNA	hsa-mir-548ak
chr10@12172786	0.19	chr10	12172682	12172856	hsa-mir-548ak	-	Pre-miRNA	hsa-mir-548ak
chr10@12172795	0.02	chr10	12172682	12172856	hsa-mir-548ak	-	Pre-miRNA	hsa-mir-548ak
chr10@12172796	0.05	chr10	12172682	12172856	hsa-mir-548ak	-	Pre-miRNA	hsa-mir-548ak
chr10@12172797	0.05	chr10	12172682	12172856	hsa-mir-548ak	-	Pre-miRNA	hsa-mir-548ak
chr10@12172802	0.18	chr10	12172682	12172856	hsa-mir-548ak	-	Pre-miRNA	hsa-mir-548ak
chr10@12172806	0.19	chr10	12172682	12172856	hsa-mir-548ak	-	Pre-miRNA	hsa-mir-548ak
chr10@12172817	0.06	chr10	12172682	12172856	hsa-mir-548ak	-	Pre-miRNA flanking region
chr10@12172818	0.03	chr10	12172682	12172856	hsa-mir-548ak	-	Pre-miRNA flanking region
chr10@12172822	0.03	chr10	12172682	12172856	hsa-mir-548ak	-	Pre-miRNA flanking region
chr10@127508276	0.04	chr10	127508251	127508471	hsa-mir-4484	+	Pre-miRNA flanking region
chr10@127508282	0.05	chr10	127508251	127508471	hsa-mir-4484	+	Pre-miRNA flanking region
chr10@127508312	0.05	chr10	127508251	127508471	hsa-mir-4484	+	Pre-miRNA	hsa-mir-4484
chr10@127508319	0.44	chr10	127508251	127508471	hsa-mir-4484	+	Pre-miRNA	hsa-mir-4484
chr10@127508323	0.22	chr10	127508251	127508471	hsa-mir-4484	+	Pre-miRNA	hsa-mir-4484
chr10@127508324	0.04	chr10	127508251	127508471	hsa-mir-4484	+	Pre-miRNA	hsa-mir-4484
chr10@127508325	0.03	chr10	127508251	127508471	hsa-mir-4484	+	Pre-miRNA	hsa-mir-4484
chr10@127508328	0.02	chr10	127508251	127508471	hsa-mir-4484	+	Pre-miRNA	hsa-mir-4484
chr10@127508334	0.05	chr10	127508251	127508471	hsa-mir-4484	+	Pre-miRNA	hsa-mir-4484
chr10@127508340	0.31	chr10	127508251	127508471	hsa-mir-4484	+	Pre-miRNA	hsa-mir-4484
chr10@12767253	0.1	chr10	12767173	12767378	hsa-mir-548q	-	Pre-miRNA	hsa-mir-548q
chr10@12767262	0.03	chr10	12767173	12767378	hsa-mir-548q	-	Pre-miRNA	hsa-mir-548q
chr10@12767263	0.04	chr10	12767173	12767378	hsa-mir-548q	-	Pre-miRNA	hsa-mir-548q
chr10@12767264	0.07	chr10	12767173	12767378	hsa-mir-548q	-	Pre-miRNA	hsa-mir-548q
chr10@12767265	0.27	chr10	12767173	12767378	hsa-mir-548q	-	Pre-miRNA	hsa-mir-548q
chr10@12767266	0.45	chr10	12767173	12767378	hsa-mir-548q	-	Pre-miRNA	hsa-mir-548q
chr10@12767269	0.44	chr10	12767173	12767378	hsa-mir-548q	-	Pre-miRNA	hsa-mir-548q
chr10@12767270	0.1	chr10	12767173	12767378	hsa-mir-548q	-	Pre-miRNA	hsa-mir-548q
chr10@12767273	0.07	chr10	12767173	12767378	hsa-mir-548q	-	Pre-miRNA	hsa-mir-548q
chr10@12767288	0.11	chr10	12767173	12767378	hsa-mir-548q	-	Pre-miRNA	hsa-mir-548q
chr10@12767295	0.02	chr10	12767173	12767378	hsa-mir-548q	-	Pre-miRNA	hsa-mir-548q
chr10@12767303	0.02	chr10	12767173	12767378	hsa-mir-548q	-	Pre-miRNA	hsa-mir-548q
chr10@12767308	0.03	chr10	12767173	12767378	hsa-mir-548q	-	Pre-miRNA	hsa-mir-548q
chr10@12767310	0.05	chr10	12767173	12767378	hsa-mir-548q	-	Pre-miRNA	hsa-mir-548q
chr10@12767313	0.1	chr10	12767173	12767378	hsa-mir-548q	-	Pre-miRNA	hsa-mir-548q
chr10@12767314	0.11	chr10	12767173	12767378	hsa-mir-548q	-	Pre-miRNA	hsa-mir-548q
chr10@12767320	0.13	chr10	12767173	12767378	hsa-mir-548q	-	Pre-miRNA	hsa-mir-548q
chr10@12767321	0.24	chr10	12767173	12767378	hsa-mir-548q	-	Pre-miRNA	hsa-mir-548q
chr10@12767322	0.32	chr10	12767173	12767378	hsa-mir-548q	-	Pre-miRNA	hsa-mir-548q
chr10@12767323	0.24	chr10	12767173	12767378	hsa-mir-548q	-	Pre-miRNA	hsa-mir-548q
chr10@12767329	0.25	chr10	12767173	12767378	hsa-mir-548q	-	Pre-miRNA	hsa-mir-548q
chr10@12767332	0.85	chr10	12767173	12767378	hsa-mir-548q	-	Pre-miRNA	hsa-mir-548q
chr10@12767340	0.02	chr10	12767173	12767378	hsa-mir-548q	-	Pre-miRNA	hsa-mir-548q
chr10@12767348	0.21	chr10	12767173	12767378	hsa-mir-548q	-	Pre-miRNA	hsa-mir-548q
chr10@12767349	0.04	chr10	12767173	12767378	hsa-mir-548q	-	Pre-miRNA	hsa-mir-548q
chr10@35368468	0.17	chr10	35368437	35368713	hsa-mir-3611	-	Pre-miRNA flanking region
chr10@35368511	0.03	chr10	35368437	35368713	hsa-mir-3611	-	Pre-miRNA flanking region
chr10@35368529	0.07	chr10	35368437	35368713	hsa-mir-3611	-	Pre-miRNA	hsa-mir-3611
chr10@35368531	0.03	chr10	35368437	35368713	hsa-mir-3611	-	Pre-miRNA	hsa-mir-3611
chr10@35368571	0.02	chr10	35368437	35368713	hsa-mir-3611	-	Pre-miRNA	hsa-mir-3611
chr10@35368574	0.04	chr10	35368437	35368713	hsa-mir-3611	-	Pre-miRNA	hsa-mir-3611
chr10@35368655	0.04	chr10	35368437	35368713	hsa-mir-3611	-	Pre-miRNA flanking region
chr10@35368681	0.04	chr10	35368437	35368713	hsa-mir-3611	-	Pre-miRNA flanking region
chr10@35368682	0.03	chr10	35368437	35368713	hsa-mir-3611	-	Pre-miRNA flanking region
chr10@43493033	0.03	chr10	43492986	43493175	hsa-mir-5100	+	Pre-miRNA	hsa-mir-5100
chr10@43493052	0.1	chr10	43492986	43493175	hsa-mir-5100	+	Pre-miRNA	hsa-mir-5100
chr10@43493056	0.05	chr10	43492986	43493175	hsa-mir-5100	+	Pre-miRNA	hsa-mir-5100
chr10@43493059	0.03	chr10	43492986	43493175	hsa-mir-5100	+	Pre-miRNA	hsa-mir-5100
chr10@43493065	0.07	chr10	43492986	43493175	hsa-mir-5100	+	Pre-miRNA	hsa-mir-5100
chr10@43493078	0.07	chr10	43492986	43493175	hsa-mir-5100	+	Pre-miRNA	hsa-mir-5100
chr10@43493084	0.03	chr10	43492986	43493175	hsa-mir-5100	+	Pre-miRNA	hsa-mir-5100
chr10@43493093	0.23	chr10	43492986	43493175	hsa-mir-5100	+	Pre-miRNA	hsa-mir-5100
chr10@43493097	0.02	chr10	43492986	43493175	hsa-mir-5100	+	Pre-miRNA	hsa-mir-5100
chr10@43493099	0.02	chr10	43492986	43493175	hsa-mir-5100	+	Pre-miRNA	hsa-mir-5100
chr10@43493103	0.03	chr10	43492986	43493175	hsa-mir-5100	+	Pre-miRNA	hsa-mir-5100
chr10@43493116	0.07	chr10	43492986	43493175	hsa-mir-5100	+	Pre-miRNA	hsa-mir-5100
chr10@43493124	0.03	chr10	43492986	43493175	hsa-mir-5100	+	Pre-miRNA	hsa-mir-5100
chr10@43493129	0.03	chr10	43492986	43493175	hsa-mir-5100	+	Pre-miRNA	hsa-mir-5100
chr10@43493135	0.06	chr10	43492986	43493175	hsa-mir-5100	+	Pre-miRNA flanking region
chr10@43493142	0.03	chr10	43492986	43493175	hsa-mir-5100	+	Pre-miRNA flanking region
chr10@43493150	0.03	chr10	43492986	43493175	hsa-mir-5100	+	Pre-miRNA flanking region
chr10@43493153	0.13	chr10	43492986	43493175	hsa-mir-5100	+	Pre-miRNA flanking region
chr10@56367639	0.02	chr10	56367605	56367789	hsa-mir-548f-1	-	Pre-miRNA	hsa-mir-548f-1
chr10@56367655	0.04	chr10	56367605	56367789	hsa-mir-548f-1	-	Pre-miRNA	hsa-mir-548f-1
chr10@56367656	0.03	chr10	56367605	56367789	hsa-mir-548f-1	-	Pre-miRNA	hsa-mir-548f-1
chr10@56367659	0.03	chr10	56367605	56367789	hsa-mir-548f-1	-	Pre-miRNA	hsa-mir-548f-1
chr10@56367675	0.03	chr10	56367605	56367789	hsa-mir-548f-1	-	Pre-miRNA	hsa-mir-548f-1
chr10@56367677	0.03	chr10	56367605	56367789	hsa-mir-548f-1	-	Pre-miRNA	hsa-mir-548f-1
chr10@56367686	0.02	chr10	56367605	56367789	hsa-mir-548f-1	-	Pre-miRNA	hsa-mir-548f-1
chr11@47422489	0.03	chr11	47422455	47422716	hsa-mir-4487	+	Pre-miRNA flanking region
chr11@47422523	0.05	chr11	47422455	47422716	hsa-mir-4487	+	Pre-miRNA	hsa-mir-4487
chr11@47422528	0.36	chr11	47422455	47422716	hsa-mir-4487	+	Pre-miRNA	hsa-mir-4487
chr11@47422529	0.1	chr11	47422455	47422716	hsa-mir-4487	+	Pre-miRNA	hsa-mir-4487
chr11@47422540	0.04	chr11	47422455	47422716	hsa-mir-4487	+	Pre-miRNA	hsa-mir-4487
chr11@47422544	0.11	chr11	47422455	47422716	hsa-mir-4487	+	Pre-miRNA	hsa-mir-4487
chr11@47422562	0.03	chr11	47422455	47422716	hsa-mir-4487	+	Pre-miRNA	hsa-mir-4487
chr11@47422567	0.17	chr11	47422455	47422716	hsa-mir-4487	+	Pre-miRNA	hsa-mir-4487
chr11@47422601	0.05	chr11	47422455	47422716	hsa-mir-4487	+	Pre-miRNA flanking region
chr11@47422603	0.03	chr11	47422455	47422716	hsa-mir-4487	+	Pre-miRNA flanking region
chr11@47422606	0.21	chr11	47422455	47422716	hsa-mir-4487	+	Pre-miRNA flanking region
chr11@47422607	0.05	chr11	47422455	47422716	hsa-mir-4487	+	Pre-miRNA flanking region
chr11@47422618	0.04	chr11	47422455	47422716	hsa-mir-4487	+	Pre-miRNA flanking region
chr11@47422650	0.16	chr11	47422455	47422716	hsa-mir-4487	+	Pre-miRNA flanking region
chr11@47422652	0.12	chr11	47422455	47422716	hsa-mir-4487	+	Pre-miRNA flanking region
chr11@47422656	0.03	chr11	47422455	47422716	hsa-mir-4487	+	Pre-miRNA flanking region
chr11@47422659	0.06	chr11	47422455	47422716	hsa-mir-4487	+	Pre-miRNA flanking region
chr11@47422677	0.03	chr11	47422455	47422716	hsa-mir-4487	+	Pre-miRNA flanking region
chr11@47422685	0.06	chr11	47422455	47422716	hsa-mir-4487	+	Pre-miRNA flanking region
chr11@59976555	0.04	chr11	59976515	59976695	hsa-mir-6503	-	Pre-miRNA	hsa-mir-6503
chr11@59976559	0.03	chr11	59976515	59976695	hsa-mir-6503	-	Pre-miRNA	hsa-mir-6503
chr11@59976572	0.02	chr11	59976515	59976695	hsa-mir-6503	-	Pre-miRNA	hsa-mir-6503
chr11@59976603	0.04	chr11	59976515	59976695	hsa-mir-6503	-	Pre-miRNA	hsa-mir-6503
chr11@59976608	0.02	chr11	59976515	59976695	hsa-mir-6503	-	Pre-miRNA	hsa-mir-6503
chr11@59976624	0.04	chr11	59976515	59976695	hsa-mir-6503	-	Pre-miRNA	hsa-mir-6503
chr11@59976627	0.02	chr11	59976515	59976695	hsa-mir-6503	-	Pre-miRNA	hsa-mir-6503
chr11@59976643	0.03	chr11	59976515	59976695	hsa-mir-6503	-	Pre-miRNA flanking region
chr11@59976644	0.03	chr11	59976515	59976695	hsa-mir-6503	-	Pre-miRNA flanking region
chr11@59976646	0.02	chr11	59976515	59976695	hsa-mir-6503	-	Pre-miRNA flanking region
chr11@59976656	0.62	chr11	59976515	59976695	hsa-mir-6503	-	Pre-miRNA flanking region
chr11@59976657	0.03	chr11	59976515	59976695	hsa-mir-6503	-	Pre-miRNA flanking region
chr11@59976664	0.06	chr11	59976515	59976695	hsa-mir-6503	-	Pre-miRNA flanking region
chr11@59976669	0.02	chr11	59976515	59976695	hsa-mir-6503	-	Pre-miRNA flanking region
chr11@59976670	0.03	chr11	59976515	59976695	hsa-mir-6503	-	Pre-miRNA flanking region
chr11@70130114	0.02	chr11	70130025	70130213	hsa-mir-548k	+	Pre-miRNA	hsa-mir-548k
chr11@70718339	0.02	chr11	70718318	70718553	hsa-mir-3664	-	Pre-miRNA flanking region
chr11@70718343	0.03	chr11	70718318	70718553	hsa-mir-3664	-	Pre-miRNA flanking region
chr11@70718345	0.04	chr11	70718318	70718553	hsa-mir-3664	-	Pre-miRNA flanking region
chr11@70718373	0.05	chr11	70718318	70718553	hsa-mir-3664	-	Pre-miRNA flanking region
chr11@70718375	0.13	chr11	70718318	70718553	hsa-mir-3664	-	Pre-miRNA	hsa-mir-3664
chr11@70718386	0.1	chr11	70718318	70718553	hsa-mir-3664	-	Pre-miRNA	hsa-mir-3664
chr11@70718390	0.02	chr11	70718318	70718553	hsa-mir-3664	-	Pre-miRNA	hsa-mir-3664
chr11@70718394	0.03	chr11	70718318	70718553	hsa-mir-3664	-	Pre-miRNA	hsa-mir-3664
chr11@70718395	0.03	chr11	70718318	70718553	hsa-mir-3664	-	Pre-miRNA	hsa-mir-3664
chr11@72326081	0.06	chr11	72326060	72326227	hsa-mir-139	-	Pre-miRNA flanking region
chr11@7255997	0.1	chr11	7255969	7256148	hsa-mir-302e	+	Pre-miRNA	hsa-mir-302e
chr11@7255998	0.03	chr11	7255969	7256148	hsa-mir-302e	+	Pre-miRNA	hsa-mir-302e
chr11@7256002	0.08	chr11	7255969	7256148	hsa-mir-302e	+	Pre-miRNA	hsa-mir-302e
chr11@7256006	0.02	chr11	7255969	7256148	hsa-mir-302e	+	Pre-miRNA	hsa-mir-302e
chr11@7256009	0.05	chr11	7255969	7256148	hsa-mir-302e	+	Pre-miRNA	hsa-mir-302e
chr11@7256010	0.05	chr11	7255969	7256148	hsa-mir-302e	+	Pre-miRNA	hsa-mir-302e
chr11@7256017	0.03	chr11	7255969	7256148	hsa-mir-302e	+	Pre-miRNA	hsa-mir-302e
chr11@7256018	0.03	chr11	7255969	7256148	hsa-mir-302e	+	Pre-miRNA	hsa-mir-302e
chr11@7256022	0.03	chr11	7255969	7256148	hsa-mir-302e	+	Pre-miRNA	hsa-mir-302e
chr11@7256023	0.02	chr11	7255969	7256148	hsa-mir-302e	+	Pre-miRNA	hsa-mir-302e
chr11@7256024	0.04	chr11	7255969	7256148	hsa-mir-302e	+	Pre-miRNA	hsa-mir-302e
chr11@7256027	0.02	chr11	7255969	7256148	hsa-mir-302e	+	Pre-miRNA	hsa-mir-302e
chr11@7256031	0.25	chr11	7255969	7256148	hsa-mir-302e	+	Pre-miRNA	hsa-mir-302e
chr11@7256034	0.14	chr11	7255969	7256148	hsa-mir-302e	+	Pre-miRNA	hsa-mir-302e
chr11@7256043	0.04	chr11	7255969	7256148	hsa-mir-302e	+	Pre-miRNA	hsa-mir-302e
chr11@7256045	0.02	chr11	7255969	7256148	hsa-mir-302e	+	Pre-miRNA	hsa-mir-302e
chr11@7256048	0.02	chr11	7255969	7256148	hsa-mir-302e	+	Pre-miRNA	hsa-mir-302e
chr11@7256062	0.24	chr11	7255969	7256148	hsa-mir-302e	+	Pre-miRNA	hsa-mir-302e
chr11@7256065	0.04	chr11	7255969	7256148	hsa-mir-302e	+	Pre-miRNA	hsa-mir-302e
chr11@7256083	0.04	chr11	7255969	7256148	hsa-mir-302e	+	Pre-miRNA flanking region
chr11@7256098	0.03	chr11	7255969	7256148	hsa-mir-302e	+	Pre-miRNA flanking region
chr11@7256109	0.03	chr11	7255969	7256148	hsa-mir-302e	+	Pre-miRNA flanking region
chr11@74110284	0.03	chr11	74110230	74110458	hsa-mir-548al	+	Pre-miRNA	hsa-mir-548al
chr11@74110288	0.02	chr11	74110230	74110458	hsa-mir-548al	+	Pre-miRNA	hsa-mir-548al
chr11@74110296	0.08	chr11	74110230	74110458	hsa-mir-548al	+	Pre-miRNA	hsa-mir-548al
chr11@74110299	0.03	chr11	74110230	74110458	hsa-mir-548al	+	Pre-miRNA	hsa-mir-548al
chr11@74110300	0.03	chr11	74110230	74110458	hsa-mir-548al	+	Pre-miRNA	hsa-mir-548al
chr11@74110303	0.12	chr11	74110230	74110458	hsa-mir-548al	+	Pre-miRNA	hsa-mir-548al
chr11@74110306	0.03	chr11	74110230	74110458	hsa-mir-548al	+	Pre-miRNA	hsa-mir-548al
chr11@74110308	0.04	chr11	74110230	74110458	hsa-mir-548al	+	Pre-miRNA	hsa-mir-548al
chr11@74110309	0.06	chr11	74110230	74110458	hsa-mir-548al	+	Pre-miRNA	hsa-mir-548al
chr11@74110324	0.02	chr11	74110230	74110458	hsa-mir-548al	+	Pre-miRNA	hsa-mir-548al
chr11@74110339	0.05	chr11	74110230	74110458	hsa-mir-548al	+	Pre-miRNA	hsa-mir-548al
chr11@74110354	0.04	chr11	74110230	74110458	hsa-mir-548al	+	Pre-miRNA	hsa-mir-548al
chr11@74110359	0.1	chr11	74110230	74110458	hsa-mir-548al	+	Pre-miRNA	hsa-mir-548al
chr11@74110360	0.02	chr11	74110230	74110458	hsa-mir-548al	+	Pre-miRNA	hsa-mir-548al
chr11@74110363	0.45	chr11	74110230	74110458	hsa-mir-548al	+	Pre-miRNA	hsa-mir-548al
chr11@74110371	0.06	chr11	74110230	74110458	hsa-mir-548al	+	Pre-miRNA	hsa-mir-548al
chr11@75046126	0.03	chr11	75046099	75046308	hsa-mir-326	-	Pre-miRNA flanking region
chr11@79113049	0.02	chr11	79113028	79113208	hsa-mir-708	-	Pre-miRNA flanking region
chr11@79113051	0.02	chr11	79113028	79113208	hsa-mir-708	-	Pre-miRNA flanking region
chr11@79113054	0.03	chr11	79113028	79113208	hsa-mir-708	-	Pre-miRNA flanking region
chr11@79113057	0.03	chr11	79113028	79113208	hsa-mir-708	-	Pre-miRNA flanking region
chr11@79113080	0.03	chr11	79113028	79113208	hsa-mir-708	-	Pre-miRNA	hsa-mir-708
chr11@79113086	0.02	chr11	79113028	79113208	hsa-mir-708	-	Pre-miRNA	hsa-mir-708
chr11@79113124	0.05	chr11	79113028	79113208	hsa-mir-708	-	Pre-miRNA	hsa-mir-708
chr11@79113130	0.03	chr11	79113028	79113208	hsa-mir-708	-	Pre-miRNA	hsa-mir-708
chr11@79113145	0.03	chr11	79113028	79113208	hsa-mir-708	-	Pre-miRNA	hsa-mir-708
chr11@79113150	0.02	chr11	79113028	79113208	hsa-mir-708	-	Pre-miRNA	hsa-mir-708
chr11@79113157	0.06	chr11	79113028	79113208	hsa-mir-708	-	Pre-miRNA flanking region
chr11@79113168	0.03	chr11	79113028	79113208	hsa-mir-708	-	Pre-miRNA flanking region
chr11@79113183	0.02	chr11	79113028	79113208	hsa-mir-708	-	Pre-miRNA flanking region
chr11@79113186	0.02	chr11	79113028	79113208	hsa-mir-708	-	Pre-miRNA flanking region
chr11@94199677	0.08	chr11	94199583	94199867	hsa-mir-548l	-	Pre-miRNA	hsa-mir-548l
chr11@94199679	0.04	chr11	94199583	94199867	hsa-mir-548l	-	Pre-miRNA	hsa-mir-548l
chr11@94199738	0.03	chr11	94199583	94199867	hsa-mir-548l	-	Pre-miRNA	hsa-mir-548l
chr11@94199785	0.02	chr11	94199583	94199867	hsa-mir-548l	-	Pre-miRNA flanking region
chr11@94199809	0.05	chr11	94199583	94199867	hsa-mir-548l	-	Pre-miRNA flanking region
chr12@109230651	0.04	chr12	109230609	109230842	hsa-mir-619	-	Pre-miRNA flanking region
chr12@109230654	0.04	chr12	109230609	109230842	hsa-mir-619	-	Pre-miRNA flanking region
chr12@109230675	0.04	chr12	109230609	109230842	hsa-mir-619	-	Pre-miRNA flanking region
chr12@109230679	0.03	chr12	109230609	109230842	hsa-mir-619	-	Pre-miRNA flanking region
chr12@57912950	0.04	chr12	57912904	57913092	hsa-mir-616	-	Pre-miRNA	hsa-mir-616
chr12@57912982	0.05	chr12	57912904	57913092	hsa-mir-616	-	Pre-miRNA	hsa-mir-616
chr12@57912985	0.02	chr12	57912904	57913092	hsa-mir-616	-	Pre-miRNA	hsa-mir-616
chr12@57913002	0.02	chr12	57912904	57913092	hsa-mir-616	-	Pre-miRNA	hsa-mir-616
chr12@57913011	0.03	chr12	57912904	57913092	hsa-mir-616	-	Pre-miRNA	hsa-mir-616
chr12@57913046	0.02	chr12	57912904	57913092	hsa-mir-616	-	Pre-miRNA flanking region
chr13@115009995	0.03	chr13	115009843	115010068	hsa-mir-548ar	+	Pre-miRNA	hsa-mir-548ar
chr13@115010004	0.02	chr13	115009843	115010068	hsa-mir-548ar	+	Pre-miRNA	hsa-mir-548ar
chr13@115010031	0.02	chr13	115009843	115010068	hsa-mir-548ar	+	Pre-miRNA	hsa-mir-548ar
chr13@115039299	0.09	chr13	115039198	115039428	hsa-mir-4502	+	Pre-miRNA flanking region
chr13@115039307	0.03	chr13	115039198	115039428	hsa-mir-4502	+	Pre-miRNA	hsa-mir-4502
chr13@115039322	0.02	chr13	115039198	115039428	hsa-mir-4502	+	Pre-miRNA	hsa-mir-4502
chr13@115039348	0.07	chr13	115039198	115039428	hsa-mir-4502	+	Pre-miRNA	hsa-mir-4502
chr13@115039358	0.06	chr13	115039198	115039428	hsa-mir-4502	+	Pre-miRNA	hsa-mir-4502
chr13@115039362	0.02	chr13	115039198	115039428	hsa-mir-4502	+	Pre-miRNA	hsa-mir-4502
chr13@115039371	0.03	chr13	115039198	115039428	hsa-mir-4502	+	Pre-miRNA	hsa-mir-4502
chr13@41675113	0.03	chr13	41675078	41675281	hsa-mir-3168	-	Pre-miRNA flanking region
chr13@41675129	0.05	chr13	41675078	41675281	hsa-mir-3168	-	Pre-miRNA flanking region
chr13@41675133	0.12	chr13	41675078	41675281	hsa-mir-3168	-	Pre-miRNA flanking region
chr13@41675134	0.05	chr13	41675078	41675281	hsa-mir-3168	-	Pre-miRNA flanking region
chr13@41675136	0.06	chr13	41675078	41675281	hsa-mir-3168	-	Pre-miRNA flanking region
chr13@41675137	0.02	chr13	41675078	41675281	hsa-mir-3168	-	Pre-miRNA flanking region
chr13@41675138	0.03	chr13	41675078	41675281	hsa-mir-3168	-	Pre-miRNA flanking region
chr13@41675146	0.04	chr13	41675078	41675281	hsa-mir-3168	-	Pre-miRNA flanking region
chr13@41675148	0.04	chr13	41675078	41675281	hsa-mir-3168	-	Pre-miRNA flanking region
chr13@41675150	0.02	chr13	41675078	41675281	hsa-mir-3168	-	Pre-miRNA flanking region
chr13@41675151	0.04	chr13	41675078	41675281	hsa-mir-3168	-	Pre-miRNA flanking region
chr13@41675156	0.08	chr13	41675078	41675281	hsa-mir-3168	-	Pre-miRNA	hsa-mir-3168
chr13@41675160	0.03	chr13	41675078	41675281	hsa-mir-3168	-	Pre-miRNA	hsa-mir-3168
chr13@41675168	0.07	chr13	41675078	41675281	hsa-mir-3168	-	Pre-miRNA	hsa-mir-3168
chr13@41675174	0.05	chr13	41675078	41675281	hsa-mir-3168	-	Pre-miRNA	hsa-mir-3168
chr13@41675181	0.1	chr13	41675078	41675281	hsa-mir-3168	-	Pre-miRNA	hsa-mir-3168
chr13@41675182	0.02	chr13	41675078	41675281	hsa-mir-3168	-	Pre-miRNA	hsa-mir-3168
chr13@41675184	0.03	chr13	41675078	41675281	hsa-mir-3168	-	Pre-miRNA	hsa-mir-3168
chr13@41675189	0.08	chr13	41675078	41675281	hsa-mir-3168	-	Pre-miRNA	hsa-mir-3168
chr13@41675190	0.05	chr13	41675078	41675281	hsa-mir-3168	-	Pre-miRNA	hsa-mir-3168
chr13@41675195	0.16	chr13	41675078	41675281	hsa-mir-3168	-	Pre-miRNA	hsa-mir-3168
chr13@41675202	0.04	chr13	41675078	41675281	hsa-mir-3168	-	Pre-miRNA	hsa-mir-3168
chr13@41675217	0.02	chr13	41675078	41675281	hsa-mir-3168	-	Pre-miRNA	hsa-mir-3168
chr13@41675225	0.04	chr13	41675078	41675281	hsa-mir-3168	-	Pre-miRNA	hsa-mir-3168
chr13@41675229	0.04	chr13	41675078	41675281	hsa-mir-3168	-	Pre-miRNA	hsa-mir-3168
chr13@41675239	0.04	chr13	41675078	41675281	hsa-mir-3168	-	Pre-miRNA flanking region
chr13@66540444	0.04	chr13	66540406	66540590	hsa-mir-548x-2	-	Pre-miRNA flanking region
chr13@66540455	0.02	chr13	66540406	66540590	hsa-mir-548x-2	-	Pre-miRNA flanking region
chr13@66540456	0.02	chr13	66540406	66540590	hsa-mir-548x-2	-	Pre-miRNA flanking region
chr13@66540474	0.4	chr13	66540406	66540590	hsa-mir-548x-2	-	Pre-miRNA	hsa-mir-548x-2
chr13@66540487	0.14	chr13	66540406	66540590	hsa-mir-548x-2	-	Pre-miRNA	hsa-mir-548x-2
chr13@66540506	0.03	chr13	66540406	66540590	hsa-mir-548x-2	-	Pre-miRNA	hsa-mir-548x-2
chr13@66540509	0.02	chr13	66540406	66540590	hsa-mir-548x-2	-	Pre-miRNA	hsa-mir-548x-2
chr13@66540516	0.05	chr13	66540406	66540590	hsa-mir-548x-2	-	Pre-miRNA	hsa-mir-548x-2
chr13@66540521	0.03	chr13	66540406	66540590	hsa-mir-548x-2	-	Pre-miRNA	hsa-mir-548x-2
chr13@66540522	0.04	chr13	66540406	66540590	hsa-mir-548x-2	-	Pre-miRNA	hsa-mir-548x-2
chr13@66540523	0.04	chr13	66540406	66540590	hsa-mir-548x-2	-	Pre-miRNA	hsa-mir-548x-2
chr13@66540524	0.78	chr13	66540406	66540590	hsa-mir-548x-2	-	Pre-miRNA	hsa-mir-548x-2
chr13@66540531	0.03	chr13	66540406	66540590	hsa-mir-548x-2	-	Pre-miRNA	hsa-mir-548x-2
chr13@93142409	0.02	chr13	93142336	93142523	hsa-mir-548as	+	Pre-miRNA flanking region
chr13@93142413	0.12	chr13	93142336	93142523	hsa-mir-548as	+	Pre-miRNA flanking region
chr13@93142431	0.02	chr13	93142336	93142523	hsa-mir-548as	+	Pre-miRNA	hsa-mir-548as
chr13@93142432	0.11	chr13	93142336	93142523	hsa-mir-548as	+	Pre-miRNA	hsa-mir-548as
chr13@93142439	0.03	chr13	93142336	93142523	hsa-mir-548as	+	Pre-miRNA	hsa-mir-548as
chr13@93142440	0.02	chr13	93142336	93142523	hsa-mir-548as	+	Pre-miRNA	hsa-mir-548as
chr13@93142443	0.04	chr13	93142336	93142523	hsa-mir-548as	+	Pre-miRNA	hsa-mir-548as
chr13@93142449	0.04	chr13	93142336	93142523	hsa-mir-548as	+	Pre-miRNA	hsa-mir-548as
chr13@93142469	0.16	chr13	93142336	93142523	hsa-mir-548as	+	Pre-miRNA	hsa-mir-548as
chr13@93142470	0.07	chr13	93142336	93142523	hsa-mir-548as	+	Pre-miRNA	hsa-mir-548as
chr13@93142473	0.03	chr13	93142336	93142523	hsa-mir-548as	+	Pre-miRNA	hsa-mir-548as
chr14@100575829	0.05	chr14	100575729	100575923	hsa-mir-151b	-	Pre-miRNA	hsa-mir-151b
chr14@100575989	0.03	chr14	100575954	100576224	hsa-mir-342	+	Pre-miRNA flanking region
chr14@100575997	0.02	chr14	100575954	100576224	hsa-mir-342	+	Pre-miRNA	hsa-mir-342
chr14@100576002	0.06	chr14	100575954	100576224	hsa-mir-342	+	Pre-miRNA	hsa-mir-342
chr14@100576018	0.03	chr14	100575954	100576224	hsa-mir-342	+	Pre-miRNA	hsa-mir-342
chr14@100576024	0.03	chr14	100575954	100576224	hsa-mir-342	+	Pre-miRNA	hsa-mir-342
chr14@100576040	0.03	chr14	100575954	100576224	hsa-mir-342	+	Pre-miRNA	hsa-mir-342
chr14@100576041	0.02	chr14	100575954	100576224	hsa-mir-342	+	Pre-miRNA	hsa-mir-342
chr14@100576049	0.11	chr14	100575954	100576224	hsa-mir-342	+	Pre-miRNA	hsa-mir-342
chr14@100576074	0.02	chr14	100575954	100576224	hsa-mir-342	+	Pre-miRNA	hsa-mir-342
chr14@100576089	0.03	chr14	100575954	100576224	hsa-mir-342	+	Pre-miRNA	hsa-mir-342
chr14@100576091	0.04	chr14	100575954	100576224	hsa-mir-342	+	Pre-miRNA flanking region
chr14@100576168	0.28	chr14	100575954	100576224	hsa-mir-342	+	Pre-miRNA flanking region
chr14@100576170	0.05	chr14	100575954	100576224	hsa-mir-342	+	Pre-miRNA flanking region
chr14@100774225	0.07	chr14	100774142	100774317	hsa-mir-345	+	Pre-miRNA	hsa-mir-345
chr14@101335429	0.02	chr14	101335341	101335511	hsa-mir-493	+	Pre-miRNA	hsa-mir-493
chr14@101335433	0.09	chr14	101335341	101335511	hsa-mir-493	+	Pre-miRNA	hsa-mir-493
chr14@101335441	0.05	chr14	101335341	101335511	hsa-mir-493	+	Pre-miRNA	hsa-mir-493
chr14@101377522	0.06	chr14	101377433	101377603	hsa-mir-370	+	Pre-miRNA	hsa-mir-370
chr14@101512886	0.03	chr14	101512737	101512948	hsa-mir-487b	+	Pre-miRNA flanking region
chr14@101512888	0.29	chr14	101512737	101512948	hsa-mir-487b	+	Pre-miRNA flanking region
chr14@101512903	0.04	chr14	101512737	101512948	hsa-mir-487b	+	Pre-miRNA flanking region
chr14@101512905	0.13	chr14	101512737	101512948	hsa-mir-487b	+	Pre-miRNA flanking region
chr14@101512907	0.07	chr14	101512737	101512948	hsa-mir-487b	+	Pre-miRNA flanking region
chr14@101512908	0.03	chr14	101512737	101512948	hsa-mir-487b	+	Pre-miRNA flanking region
chr14@101512913	0.06	chr14	101512737	101512948	hsa-mir-487b	+	Pre-miRNA flanking region
chr14@101512920	0.03	chr14	101512737	101512948	hsa-mir-487b	+	Pre-miRNA flanking region
chr14@101512922	0.03	chr14	101512737	101512948	hsa-mir-487b	+	Pre-miRNA flanking region
chr14@48230232	0.03	chr14	48230166	48230339	hsa-mir-548y	-	Pre-miRNA	hsa-mir-548y
chr14@48230256	0.08	chr14	48230166	48230339	hsa-mir-548y	-	Pre-miRNA	hsa-mir-548y
chr14@48230258	0.05	chr14	48230166	48230339	hsa-mir-548y	-	Pre-miRNA	hsa-mir-548y
chr14@48230262	0.02	chr14	48230166	48230339	hsa-mir-548y	-	Pre-miRNA	hsa-mir-548y
chr14@48230270	0.17	chr14	48230166	48230339	hsa-mir-548y	-	Pre-miRNA	hsa-mir-548y
chr14@48230271	0.04	chr14	48230166	48230339	hsa-mir-548y	-	Pre-miRNA	hsa-mir-548y
chr14@48230291	0.03	chr14	48230166	48230339	hsa-mir-548y	-	Pre-miRNA	hsa-mir-548y
chr14@48230297	0.17	chr14	48230166	48230339	hsa-mir-548y	-	Pre-miRNA	hsa-mir-548y
chr14@48230317	0.04	chr14	48230166	48230339	hsa-mir-548y	-	Pre-miRNA flanking region
chr14@64561695	0.03	chr14	64561637	64561931	hsa-mir-548h-1	-	Pre-miRNA flanking region
chr14@64561711	0.03	chr14	64561637	64561931	hsa-mir-548h-1	-	Pre-miRNA flanking region
chr14@64561732	0.05	chr14	64561637	64561931	hsa-mir-548h-1	-	Pre-miRNA flanking region
chr14@64561763	0.08	chr14	64561637	64561931	hsa-mir-548h-1	-	Pre-miRNA	hsa-mir-548h-1
chr14@64561774	0.02	chr14	64561637	64561931	hsa-mir-548h-1	-	Pre-miRNA	hsa-mir-548h-1
chr14@64561805	0.04	chr14	64561637	64561931	hsa-mir-548h-1	-	Pre-miRNA	hsa-mir-548h-1
chr14@64561807	0.03	chr14	64561637	64561931	hsa-mir-548h-1	-	Pre-miRNA	hsa-mir-548h-1
chr14@64561808	0.13	chr14	64561637	64561931	hsa-mir-548h-1	-	Pre-miRNA	hsa-mir-548h-1
chr14@64561818	0.08	chr14	64561637	64561931	hsa-mir-548h-1	-	Pre-miRNA	hsa-mir-548h-1
chr14@64561826	0.09	chr14	64561637	64561931	hsa-mir-548h-1	-	Pre-miRNA	hsa-mir-548h-1
chr14@64561830	0.1	chr14	64561637	64561931	hsa-mir-548h-1	-	Pre-miRNA	hsa-mir-548h-1
chr14@64561882	0.02	chr14	64561637	64561931	hsa-mir-548h-1	-	Pre-miRNA flanking region
chr14@65937807	0.02	chr14	65937784	65937976	hsa-mir-625	+	Pre-miRNA flanking region
chr14@65937810	0.03	chr14	65937784	65937976	hsa-mir-625	+	Pre-miRNA flanking region
chr14@65937812	0.04	chr14	65937784	65937976	hsa-mir-625	+	Pre-miRNA flanking region
chr14@65937844	0.04	chr14	65937784	65937976	hsa-mir-625	+	Pre-miRNA	hsa-mir-625
chr14@65937845	0.03	chr14	65937784	65937976	hsa-mir-625	+	Pre-miRNA	hsa-mir-625
chr14@65937849	0.04	chr14	65937784	65937976	hsa-mir-625	+	Pre-miRNA	hsa-mir-625
chr14@65937852	0.09	chr14	65937784	65937976	hsa-mir-625	+	Pre-miRNA	hsa-mir-625
chr14@65937855	0.09	chr14	65937784	65937976	hsa-mir-625	+	Pre-miRNA	hsa-mir-625
chr14@65937860	0.09	chr14	65937784	65937976	hsa-mir-625	+	Pre-miRNA	hsa-mir-625
chr14@65937865	0.03	chr14	65937784	65937976	hsa-mir-625	+	Pre-miRNA	hsa-mir-625
chr14@65937867	0.05	chr14	65937784	65937976	hsa-mir-625	+	Pre-miRNA	hsa-mir-625
chr14@65937882	0.03	chr14	65937784	65937976	hsa-mir-625	+	Pre-miRNA	hsa-mir-625
chr14@65937883	0.05	chr14	65937784	65937976	hsa-mir-625	+	Pre-miRNA	hsa-mir-625
chr14@65937884	0.03	chr14	65937784	65937976	hsa-mir-625	+	Pre-miRNA	hsa-mir-625
chr14@65937890	0.05	chr14	65937784	65937976	hsa-mir-625	+	Pre-miRNA	hsa-mir-625
chr14@65937893	0.04	chr14	65937784	65937976	hsa-mir-625	+	Pre-miRNA	hsa-mir-625
chr14@65937906	0.02	chr14	65937784	65937976	hsa-mir-625	+	Pre-miRNA flanking region
chr14@65937913	0.02	chr14	65937784	65937976	hsa-mir-625	+	Pre-miRNA flanking region
chr14@65937915	0.02	chr14	65937784	65937976	hsa-mir-625	+	Pre-miRNA flanking region
chr14@65937926	0.07	chr14	65937784	65937976	hsa-mir-625	+	Pre-miRNA flanking region
chr14@65937934	0.06	chr14	65937784	65937976	hsa-mir-625	+	Pre-miRNA flanking region
chr14@65937936	0.03	chr14	65937784	65937976	hsa-mir-625	+	Pre-miRNA flanking region
chr14@65937938	0.04	chr14	65937784	65937976	hsa-mir-625	+	Pre-miRNA flanking region
chr14@65937940	0.05	chr14	65937784	65937976	hsa-mir-625	+	Pre-miRNA flanking region
chr14@65937942	0.03	chr14	65937784	65937976	hsa-mir-625	+	Pre-miRNA flanking region
chr14@65937944	0.04	chr14	65937784	65937976	hsa-mir-625	+	Pre-miRNA flanking region
chr14@65937950	0.03	chr14	65937784	65937976	hsa-mir-625	+	Pre-miRNA flanking region
chr15@21145688	0.22	chr15	21145484	21145711	hsa-mir-5701-1	+	Pre-miRNA flanking region
chr15@36219000	0.04	chr15	36218978	36219156	hsa-mir-4510	+	Pre-miRNA flanking region
chr15@36219013	0.23	chr15	36218978	36219156	hsa-mir-4510	+	Pre-miRNA flanking region
chr15@36219014	0.02	chr15	36218978	36219156	hsa-mir-4510	+	Pre-miRNA flanking region
chr15@36219016	0.05	chr15	36218978	36219156	hsa-mir-4510	+	Pre-miRNA flanking region
chr15@36219017	0.02	chr15	36218978	36219156	hsa-mir-4510	+	Pre-miRNA flanking region
chr15@36219022	0.02	chr15	36218978	36219156	hsa-mir-4510	+	Pre-miRNA flanking region
chr15@36219039	0.03	chr15	36218978	36219156	hsa-mir-4510	+	Pre-miRNA flanking region
chr15@36219044	0.03	chr15	36218978	36219156	hsa-mir-4510	+	Pre-miRNA flanking region
chr15@36219046	0.11	chr15	36218978	36219156	hsa-mir-4510	+	Pre-miRNA flanking region
chr15@36219048	0.04	chr15	36218978	36219156	hsa-mir-4510	+	Pre-miRNA flanking region
chr15@52569285	0.03	chr15	52569255	52569475	hsa-mir-1266	-	Pre-miRNA flanking region
chr15@52569287	0.08	chr15	52569255	52569475	hsa-mir-1266	-	Pre-miRNA flanking region
chr15@52569292	0.03	chr15	52569255	52569475	hsa-mir-1266	-	Pre-miRNA flanking region
chr15@52569304	0.02	chr15	52569255	52569475	hsa-mir-1266	-	Pre-miRNA flanking region
chr15@52569307	0.06	chr15	52569255	52569475	hsa-mir-1266	-	Pre-miRNA flanking region
chr15@52569311	0.02	chr15	52569255	52569475	hsa-mir-1266	-	Pre-miRNA flanking region
chr15@52569312	0.02	chr15	52569255	52569475	hsa-mir-1266	-	Pre-miRNA flanking region
chr15@52569313	0.77	chr15	52569255	52569475	hsa-mir-1266	-	Pre-miRNA flanking region
chr15@52569318	0.04	chr15	52569255	52569475	hsa-mir-1266	-	Pre-miRNA	hsa-mir-1266
chr15@52569344	0.03	chr15	52569255	52569475	hsa-mir-1266	-	Pre-miRNA	hsa-mir-1266
chr15@52569346	0.07	chr15	52569255	52569475	hsa-mir-1266	-	Pre-miRNA	hsa-mir-1266
chr15@52569358	0.04	chr15	52569255	52569475	hsa-mir-1266	-	Pre-miRNA	hsa-mir-1266
chr15@52569363	0.02	chr15	52569255	52569475	hsa-mir-1266	-	Pre-miRNA	hsa-mir-1266
chr15@52569376	0.02	chr15	52569255	52569475	hsa-mir-1266	-	Pre-miRNA	hsa-mir-1266
chr15@81134298	0.05	chr15	81134274	81134444	hsa-mir-549a	-	Pre-miRNA flanking region
chr15@81134303	0.03	chr15	81134274	81134444	hsa-mir-549a	-	Pre-miRNA flanking region
chr15@81134305	0.47	chr15	81134274	81134444	hsa-mir-549a	-	Pre-miRNA flanking region
chr15@81134311	0.81	chr15	81134274	81134444	hsa-mir-549a	-	Pre-miRNA flanking region
chr15@81134314	0.03	chr15	81134274	81134444	hsa-mir-549a	-	Pre-miRNA flanking region
chr15@81134328	0.88	chr15	81134274	81134444	hsa-mir-549a	-	Pre-miRNA	hsa-mir-549a
chr15@81134330	0.88	chr15	81134274	81134444	hsa-mir-549a	-	Pre-miRNA	hsa-mir-549a
chr15@81134333	0.96	chr15	81134274	81134444	hsa-mir-549a	-	Pre-miRNA	hsa-mir-549a
chr15@81134334	0.92	chr15	81134274	81134444	hsa-mir-549a	-	Pre-miRNA	hsa-mir-549a
chr15@81134336	0.36	chr15	81134274	81134444	hsa-mir-549a	-	Pre-miRNA	hsa-mir-549a
chr15@81134341	0.03	chr15	81134274	81134444	hsa-mir-549a	-	Pre-miRNA	hsa-mir-549a
chr15@86368900	0.05	chr15	86368801	86369029	hsa-mir-548ap	+	Pre-miRNA	hsa-mir-548ap
chr15@86368919	0.33	chr15	86368801	86369029	hsa-mir-548ap	+	Pre-miRNA	hsa-mir-548ap
chr15@86368939	0.05	chr15	86368801	86369029	hsa-mir-548ap	+	Pre-miRNA	hsa-mir-548ap
chr15@86368945	0.09	chr15	86368801	86369029	hsa-mir-548ap	+	Pre-miRNA	hsa-mir-548ap
chr15@86368992	0.04	chr15	86368801	86369029	hsa-mir-548ap	+	Pre-miRNA flanking region
chr16@11400376	0.06	chr16	11400271	11400508	hsa-mir-548h-2	-	Pre-miRNA	hsa-mir-548h-2
chr16@26036537	0.02	chr16	26036510	26036695	hsa-mir-548w	+	Pre-miRNA flanking region
chr16@26036560	0.03	chr16	26036510	26036695	hsa-mir-548w	+	Pre-miRNA	hsa-mir-548w
chr16@26036582	0.03	chr16	26036510	26036695	hsa-mir-548w	+	Pre-miRNA	hsa-mir-548w
chr16@26036583	0.02	chr16	26036510	26036695	hsa-mir-548w	+	Pre-miRNA	hsa-mir-548w
chr16@26036585	0.05	chr16	26036510	26036695	hsa-mir-548w	+	Pre-miRNA	hsa-mir-548w
chr16@26036589	0.02	chr16	26036510	26036695	hsa-mir-548w	+	Pre-miRNA	hsa-mir-548w
chr16@26036590	0.04	chr16	26036510	26036695	hsa-mir-548w	+	Pre-miRNA	hsa-mir-548w
chr16@26036591	0.02	chr16	26036510	26036695	hsa-mir-548w	+	Pre-miRNA	hsa-mir-548w
chr16@26036600	0.07	chr16	26036510	26036695	hsa-mir-548w	+	Pre-miRNA	hsa-mir-548w
chr16@26036615	0.03	chr16	26036510	26036695	hsa-mir-548w	+	Pre-miRNA	hsa-mir-548w
chr16@26036639	0.02	chr16	26036510	26036695	hsa-mir-548w	+	Pre-miRNA flanking region
chr16@26036640	0.02	chr16	26036510	26036695	hsa-mir-548w	+	Pre-miRNA flanking region
chr16@26036653	0.13	chr16	26036510	26036695	hsa-mir-548w	+	Pre-miRNA flanking region
chr16@26036656	0.11	chr16	26036510	26036695	hsa-mir-548w	+	Pre-miRNA flanking region
chr16@26036657	0.03	chr16	26036510	26036695	hsa-mir-548w	+	Pre-miRNA flanking region
chr16@30515259	0.09	chr16	30515214	30515388	hsa-mir-4518	+	Pre-miRNA	hsa-mir-4518
chr16@30515267	0.03	chr16	30515214	30515388	hsa-mir-4518	+	Pre-miRNA	hsa-mir-4518
chr16@30515272	0.17	chr16	30515214	30515388	hsa-mir-4518	+	Pre-miRNA	hsa-mir-4518
chr16@30515274	0.03	chr16	30515214	30515388	hsa-mir-4518	+	Pre-miRNA	hsa-mir-4518
chr16@30515277	0.05	chr16	30515214	30515388	hsa-mir-4518	+	Pre-miRNA	hsa-mir-4518
chr17@12820558	0.05	chr17	12820530	12820728	hsa-mir-1269b	-	Pre-miRNA flanking region
chr17@12820567	0.02	chr17	12820530	12820728	hsa-mir-1269b	-	Pre-miRNA flanking region
chr17@12820577	0.02	chr17	12820530	12820728	hsa-mir-1269b	-	Pre-miRNA flanking region
chr17@12820579	0.09	chr17	12820530	12820728	hsa-mir-1269b	-	Pre-miRNA flanking region
chr17@12820604	0.04	chr17	12820530	12820728	hsa-mir-1269b	-	Pre-miRNA	hsa-mir-1269b
chr17@12820610	0.06	chr17	12820530	12820728	hsa-mir-1269b	-	Pre-miRNA	hsa-mir-1269b
chr17@12820617	0.05	chr17	12820530	12820728	hsa-mir-1269b	-	Pre-miRNA	hsa-mir-1269b
chr17@12820620	0.03	chr17	12820530	12820728	hsa-mir-1269b	-	Pre-miRNA	hsa-mir-1269b
chr17@12820627	0.06	chr17	12820530	12820728	hsa-mir-1269b	-	Pre-miRNA	hsa-mir-1269b
chr17@12820628	0.03	chr17	12820530	12820728	hsa-mir-1269b	-	Pre-miRNA	hsa-mir-1269b
chr17@12820652	0.02	chr17	12820530	12820728	hsa-mir-1269b	-	Pre-miRNA	hsa-mir-1269b
chr17@12820661	0.05	chr17	12820530	12820728	hsa-mir-1269b	-	Pre-miRNA flanking region
chr17@12820668	0.02	chr17	12820530	12820728	hsa-mir-1269b	-	Pre-miRNA flanking region
chr17@12820678	0.05	chr17	12820530	12820728	hsa-mir-1269b	-	Pre-miRNA flanking region
chr17@12820689	0.06	chr17	12820530	12820728	hsa-mir-1269b	-	Pre-miRNA flanking region
chr17@12820690	0.03	chr17	12820530	12820728	hsa-mir-1269b	-	Pre-miRNA flanking region
chr17@12820695	0.03	chr17	12820530	12820728	hsa-mir-1269b	-	Pre-miRNA flanking region
chr17@13446806	0.1	chr17	13446766	13447008	hsa-mir-548h-3	-	Pre-miRNA flanking region
chr17@13446809	0.13	chr17	13446766	13447008	hsa-mir-548h-3	-	Pre-miRNA flanking region
chr17@13446811	0.13	chr17	13446766	13447008	hsa-mir-548h-3	-	Pre-miRNA flanking region
chr17@13446813	0.02	chr17	13446766	13447008	hsa-mir-548h-3	-	Pre-miRNA flanking region
chr17@13446814	0.06	chr17	13446766	13447008	hsa-mir-548h-3	-	Pre-miRNA flanking region
chr17@13446821	0.06	chr17	13446766	13447008	hsa-mir-548h-3	-	Pre-miRNA flanking region
chr17@13446826	0.11	chr17	13446766	13447008	hsa-mir-548h-3	-	Pre-miRNA flanking region
chr17@13446828	0.19	chr17	13446766	13447008	hsa-mir-548h-3	-	Pre-miRNA flanking region
chr17@13446831	0.03	chr17	13446766	13447008	hsa-mir-548h-3	-	Pre-miRNA flanking region
chr17@13446844	0.05	chr17	13446766	13447008	hsa-mir-548h-3	-	Pre-miRNA flanking region
chr17@13446845	0.04	chr17	13446766	13447008	hsa-mir-548h-3	-	Pre-miRNA flanking region
chr17@13446853	0.06	chr17	13446766	13447008	hsa-mir-548h-3	-	Pre-miRNA	hsa-mir-548h-3
chr17@13446861	0.04	chr17	13446766	13447008	hsa-mir-548h-3	-	Pre-miRNA	hsa-mir-548h-3
chr17@13446881	0.11	chr17	13446766	13447008	hsa-mir-548h-3	-	Pre-miRNA	hsa-mir-548h-3
chr17@13446887	0.36	chr17	13446766	13447008	hsa-mir-548h-3	-	Pre-miRNA	hsa-mir-548h-3
chr17@13446905	0.05	chr17	13446766	13447008	hsa-mir-548h-3	-	Pre-miRNA	hsa-mir-548h-3
chr17@13446915	0.06	chr17	13446766	13447008	hsa-mir-548h-3	-	Pre-miRNA	hsa-mir-548h-3
chr17@13446919	0.04	chr17	13446766	13447008	hsa-mir-548h-3	-	Pre-miRNA	hsa-mir-548h-3
chr17@13446947	0.05	chr17	13446766	13447008	hsa-mir-548h-3	-	Pre-miRNA	hsa-mir-548h-3
chr17@13446949	0.02	chr17	13446766	13447008	hsa-mir-548h-3	-	Pre-miRNA	hsa-mir-548h-3
chr17@13446955	0.04	chr17	13446766	13447008	hsa-mir-548h-3	-	Pre-miRNA	hsa-mir-548h-3
chr17@13446957	0.02	chr17	13446766	13447008	hsa-mir-548h-3	-	Pre-miRNA	hsa-mir-548h-3
chr17@13446963	0.15	chr17	13446766	13447008	hsa-mir-548h-3	-	Pre-miRNA	hsa-mir-548h-3
chr17@13446977	0.08	chr17	13446766	13447008	hsa-mir-548h-3	-	Pre-miRNA flanking region
chr17@13446984	0.03	chr17	13446766	13447008	hsa-mir-548h-3	-	Pre-miRNA flanking region
chr17@13446985	0.03	chr17	13446766	13447008	hsa-mir-548h-3	-	Pre-miRNA flanking region
chr17@35975100	0.22	chr17	35974868	35975138	hsa-mir-378j	-	Pre-miRNA flanking region
chr17@80626072	0.04	chr17	80626032	80626216	hsa-mir-4525	-	Pre-miRNA flanking region
chr17@80626112	0.04	chr17	80626032	80626216	hsa-mir-4525	-	Pre-miRNA	hsa-mir-4525
chr17@80626122	0.09	chr17	80626032	80626216	hsa-mir-4525	-	Pre-miRNA	hsa-mir-4525
chr17@80626127	0.03	chr17	80626032	80626216	hsa-mir-4525	-	Pre-miRNA	hsa-mir-4525
chr17@80626143	0.03	chr17	80626032	80626216	hsa-mir-4525	-	Pre-miRNA	hsa-mir-4525
chr17@80626147	0.02	chr17	80626032	80626216	hsa-mir-4525	-	Pre-miRNA	hsa-mir-4525
chr17@80626152	0.03	chr17	80626032	80626216	hsa-mir-4525	-	Pre-miRNA	hsa-mir-4525
chr17@80626157	0.03	chr17	80626032	80626216	hsa-mir-4525	-	Pre-miRNA	hsa-mir-4525
chr17@80626158	0.03	chr17	80626032	80626216	hsa-mir-4525	-	Pre-miRNA	hsa-mir-4525
chr17@80626164	0.73	chr17	80626032	80626216	hsa-mir-4525	-	Pre-miRNA	hsa-mir-4525
chr17@80626168	0.11	chr17	80626032	80626216	hsa-mir-4525	-	Pre-miRNA	hsa-mir-4525
chr17@80626170	0.05	chr17	80626032	80626216	hsa-mir-4525	-	Pre-miRNA	hsa-mir-4525
chr17@80626182	0.11	chr17	80626032	80626216	hsa-mir-4525	-	Pre-miRNA	hsa-mir-4525
chr17@80626185	0.04	chr17	80626032	80626216	hsa-mir-4525	-	Pre-miRNA flanking region
chr17@80626187	0.03	chr17	80626032	80626216	hsa-mir-4525	-	Pre-miRNA flanking region
chr17@80626190	0.02	chr17	80626032	80626216	hsa-mir-4525	-	Pre-miRNA flanking region
chr17@8090242	0.03	chr17	8090214	8090393	hsa-mir-4521	+	Pre-miRNA flanking region
chr17@8090246	0.04	chr17	8090214	8090393	hsa-mir-4521	+	Pre-miRNA flanking region
chr17@8090252	0.03	chr17	8090214	8090393	hsa-mir-4521	+	Pre-miRNA flanking region
chr17@8090260	0.02	chr17	8090214	8090393	hsa-mir-4521	+	Pre-miRNA flanking region
chr17@8090263	0.14	chr17	8090214	8090393	hsa-mir-4521	+	Pre-miRNA	hsa-mir-4521
chr18@11655045	0.06	chr18	11654838	11655079	hsa-mir-7153	-	Pre-miRNA flanking region
chr18@11655058	0.02	chr18	11654838	11655079	hsa-mir-7153	-	Pre-miRNA flanking region
chr18@21901563	0.02	chr18	21901541	21901813	hsa-mir-320c-2	+	Pre-miRNA flanking region
chr18@21901564	0.03	chr18	21901541	21901813	hsa-mir-320c-2	+	Pre-miRNA flanking region
chr18@33514116	0.03	chr18	33513998	33514180	hsa-mir-3929	-	Pre-miRNA flanking region
chr18@33514123	0.05	chr18	33513998	33514180	hsa-mir-3929	-	Pre-miRNA flanking region
chr18@33514131	0.04	chr18	33513998	33514180	hsa-mir-3929	-	Pre-miRNA flanking region
chr18@33514154	0.04	chr18	33513998	33514180	hsa-mir-3929	-	Pre-miRNA flanking region
chr18@70520548	0.06	chr18	70520478	70520659	hsa-mir-548av	-	Pre-miRNA flanking region
chr18@70520561	0.1	chr18	70520478	70520659	hsa-mir-548av	-	Pre-miRNA	hsa-mir-548av
chr18@70520570	0.02	chr18	70520478	70520659	hsa-mir-548av	-	Pre-miRNA	hsa-mir-548av
chr18@70520584	0.03	chr18	70520478	70520659	hsa-mir-548av	-	Pre-miRNA	hsa-mir-548av
chr18@70520590	0.04	chr18	70520478	70520659	hsa-mir-548av	-	Pre-miRNA	hsa-mir-548av
chr18@70520595	0.02	chr18	70520478	70520659	hsa-mir-548av	-	Pre-miRNA	hsa-mir-548av
chr18@70520600	0.06	chr18	70520478	70520659	hsa-mir-548av	-	Pre-miRNA	hsa-mir-548av
chr18@70520601	0.03	chr18	70520478	70520659	hsa-mir-548av	-	Pre-miRNA	hsa-mir-548av
chr18@70520608	0.03	chr18	70520478	70520659	hsa-mir-548av	-	Pre-miRNA	hsa-mir-548av
chr18@70520624	0.16	chr18	70520478	70520659	hsa-mir-548av	-	Pre-miRNA flanking region
chr19@40788556	0.03	chr19	40788400	40788622	hsa-mir-641	-	Pre-miRNA flanking region
chr19@40788564	0.03	chr19	40788400	40788622	hsa-mir-641	-	Pre-miRNA flanking region
chr19@40788567	0.03	chr19	40788400	40788622	hsa-mir-641	-	Pre-miRNA flanking region
chr19@40788571	0.02	chr19	40788400	40788622	hsa-mir-641	-	Pre-miRNA flanking region
chr19@40788572	0.03	chr19	40788400	40788622	hsa-mir-641	-	Pre-miRNA flanking region
chr19@40788576	0.04	chr19	40788400	40788622	hsa-mir-641	-	Pre-miRNA flanking region
chr19@40788581	0.03	chr19	40788400	40788622	hsa-mir-641	-	Pre-miRNA flanking region
chr19@40788596	0.03	chr19	40788400	40788622	hsa-mir-641	-	Pre-miRNA flanking region
chr19@46142297	0.04	chr19	46142178	46142394	hsa-mir-330	-	Pre-miRNA	hsa-mir-330
chr19@46142314	0.04	chr19	46142178	46142394	hsa-mir-330	-	Pre-miRNA	hsa-mir-330
chr19@46142316	0.03	chr19	46142178	46142394	hsa-mir-330	-	Pre-miRNA	hsa-mir-330
chr19@46142328	0.03	chr19	46142178	46142394	hsa-mir-330	-	Pre-miRNA	hsa-mir-330
chr19@46142349	0.03	chr19	46142178	46142394	hsa-mir-330	-	Pre-miRNA flanking region
chr19@52196465	0.04	chr19	52196444	52196643	hsa-mir-125a	+	Pre-miRNA flanking region
chr19@55634505	0.02	chr19	55634467	55634690	hsa-mir-7975	-	Pre-miRNA flanking region
chr19@55634520	0.03	chr19	55634467	55634690	hsa-mir-7975	-	Pre-miRNA flanking region
chr19@55634533	0.03	chr19	55634467	55634690	hsa-mir-7975	-	Pre-miRNA flanking region
chr19@55634546	0.03	chr19	55634467	55634690	hsa-mir-7975	-	Pre-miRNA flanking region
chr19@55634550	0.09	chr19	55634467	55634690	hsa-mir-7975	-	Pre-miRNA flanking region
chr19@55634551	0.02	chr19	55634467	55634690	hsa-mir-7975	-	Pre-miRNA flanking region
chr19@55634575	0.08	chr19	55634467	55634690	hsa-mir-7975	-	Pre-miRNA flanking region
chr19@55634588	0.06	chr19	55634467	55634690	hsa-mir-7975	-	Pre-miRNA flanking region
chr19@55634617	0.03	chr19	55634467	55634690	hsa-mir-7975	-	Pre-miRNA	hsa-mir-7975
chr19@55634635	0.05	chr19	55634467	55634690	hsa-mir-7975	-	Pre-miRNA	hsa-mir-7975
chr19@55634665	0.03	chr19	55634467	55634690	hsa-mir-7975	-	Pre-miRNA flanking region
chr1@117102610	0.02	chr1	117102574	117102866	hsa-mir-548ac	-	Pre-miRNA flanking region
chr1@117102645	0.04	chr1	117102574	117102866	hsa-mir-548ac	-	Pre-miRNA flanking region
chr1@117102656	0.45	chr1	117102574	117102866	hsa-mir-548ac	-	Pre-miRNA	hsa-mir-548ac
chr1@117102664	0.04	chr1	117102574	117102866	hsa-mir-548ac	-	Pre-miRNA	hsa-mir-548ac
chr1@117102693	0.03	chr1	117102574	117102866	hsa-mir-548ac	-	Pre-miRNA	hsa-mir-548ac
chr1@117102695	0.06	chr1	117102574	117102866	hsa-mir-548ac	-	Pre-miRNA	hsa-mir-548ac
chr1@117102697	0.29	chr1	117102574	117102866	hsa-mir-548ac	-	Pre-miRNA	hsa-mir-548ac
chr1@117102702	0.04	chr1	117102574	117102866	hsa-mir-548ac	-	Pre-miRNA	hsa-mir-548ac
chr1@117102703	0.09	chr1	117102574	117102866	hsa-mir-548ac	-	Pre-miRNA	hsa-mir-548ac
chr1@117102710	0.02	chr1	117102574	117102866	hsa-mir-548ac	-	Pre-miRNA	hsa-mir-548ac
chr1@117102732	0.02	chr1	117102574	117102866	hsa-mir-548ac	-	Pre-miRNA	hsa-mir-548ac
chr1@117102770	0.03	chr1	117102574	117102866	hsa-mir-548ac	-	Pre-miRNA flanking region
chr1@117102776	0.03	chr1	117102574	117102866	hsa-mir-548ac	-	Pre-miRNA flanking region
chr1@117102778	0.03	chr1	117102574	117102866	hsa-mir-548ac	-	Pre-miRNA flanking region
chr1@117102798	0.02	chr1	117102574	117102866	hsa-mir-548ac	-	Pre-miRNA flanking region
chr1@117214294	0.03	chr1	117214270	117214513	hsa-mir-320b-1	+	Pre-miRNA flanking region
chr1@117214295	0.02	chr1	117214270	117214513	hsa-mir-320b-1	+	Pre-miRNA flanking region
chr1@117214317	0.05	chr1	117214270	117214513	hsa-mir-320b-1	+	Pre-miRNA flanking region
chr1@117214441	0.03	chr1	117214270	117214513	hsa-mir-320b-1	+	Pre-miRNA	hsa-mir-320b-1
chr1@117214448	0.02	chr1	117214270	117214513	hsa-mir-320b-1	+	Pre-miRNA	hsa-mir-320b-1
chr1@117637354	0.02	chr1	117637207	117637384	hsa-mir-942	+	Pre-miRNA flanking region
chr1@167967749	0.02	chr1	167967723	167968016	hsa-mir-1255b-2	+	Pre-miRNA flanking region
chr1@167967767	0.16	chr1	167967723	167968016	hsa-mir-1255b-2	+	Pre-miRNA flanking region
chr1@167967769	0.02	chr1	167967723	167968016	hsa-mir-1255b-2	+	Pre-miRNA flanking region
chr1@167967772	0.03	chr1	167967723	167968016	hsa-mir-1255b-2	+	Pre-miRNA flanking region
chr1@167967784	0.04	chr1	167967723	167968016	hsa-mir-1255b-2	+	Pre-miRNA flanking region
chr1@167967791	0.04	chr1	167967723	167968016	hsa-mir-1255b-2	+	Pre-miRNA flanking region
chr1@167967804	0.04	chr1	167967723	167968016	hsa-mir-1255b-2	+	Pre-miRNA flanking region
chr1@167967807	0.04	chr1	167967723	167968016	hsa-mir-1255b-2	+	Pre-miRNA flanking region
chr1@167967810	0.02	chr1	167967723	167968016	hsa-mir-1255b-2	+	Pre-miRNA flanking region
chr1@167967827	0.03	chr1	167967723	167968016	hsa-mir-1255b-2	+	Pre-miRNA flanking region
chr1@167967835	0.02	chr1	167967723	167968016	hsa-mir-1255b-2	+	Pre-miRNA flanking region
chr1@167967854	0.05	chr1	167967723	167968016	hsa-mir-1255b-2	+	Pre-miRNA flanking region
chr1@167967861	0.04	chr1	167967723	167968016	hsa-mir-1255b-2	+	Pre-miRNA flanking region
chr1@167967882	0.03	chr1	167967723	167968016	hsa-mir-1255b-2	+	Pre-miRNA flanking region
chr1@167967893	0.07	chr1	167967723	167968016	hsa-mir-1255b-2	+	Pre-miRNA flanking region
chr1@167967907	0.04	chr1	167967723	167968016	hsa-mir-1255b-2	+	Pre-miRNA	hsa-mir-1255b-2
chr1@167967920	0.02	chr1	167967723	167968016	hsa-mir-1255b-2	+	Pre-miRNA	hsa-mir-1255b-2
chr1@167967923	0.04	chr1	167967723	167968016	hsa-mir-1255b-2	+	Pre-miRNA	hsa-mir-1255b-2
chr1@167967924	0.03	chr1	167967723	167968016	hsa-mir-1255b-2	+	Pre-miRNA	hsa-mir-1255b-2
chr1@167967931	0.04	chr1	167967723	167968016	hsa-mir-1255b-2	+	Pre-miRNA	hsa-mir-1255b-2
chr1@167967947	0.03	chr1	167967723	167968016	hsa-mir-1255b-2	+	Pre-miRNA	hsa-mir-1255b-2
chr1@167967948	0.07	chr1	167967723	167968016	hsa-mir-1255b-2	+	Pre-miRNA	hsa-mir-1255b-2
chr1@167967952	0.02	chr1	167967723	167968016	hsa-mir-1255b-2	+	Pre-miRNA	hsa-mir-1255b-2
chr1@167967980	0.14	chr1	167967723	167968016	hsa-mir-1255b-2	+	Pre-miRNA flanking region
chr1@19223546	0.03	chr1	19223517	19223719	hsa-mir-1290	-	Pre-miRNA flanking region
chr1@19223549	0.05	chr1	19223517	19223719	hsa-mir-1290	-	Pre-miRNA flanking region
chr1@19223552	0.05	chr1	19223517	19223719	hsa-mir-1290	-	Pre-miRNA flanking region
chr1@19223557	0.05	chr1	19223517	19223719	hsa-mir-1290	-	Pre-miRNA flanking region
chr1@19223562	0.02	chr1	19223517	19223719	hsa-mir-1290	-	Pre-miRNA flanking region
chr1@19223568	0.21	chr1	19223517	19223719	hsa-mir-1290	-	Pre-miRNA	hsa-mir-1290
chr1@19223578	0.03	chr1	19223517	19223719	hsa-mir-1290	-	Pre-miRNA	hsa-mir-1290
chr1@19223590	0.03	chr1	19223517	19223719	hsa-mir-1290	-	Pre-miRNA	hsa-mir-1290
chr1@19223593	0.07	chr1	19223517	19223719	hsa-mir-1290	-	Pre-miRNA	hsa-mir-1290
chr1@19223599	0.02	chr1	19223517	19223719	hsa-mir-1290	-	Pre-miRNA	hsa-mir-1290
chr1@19223600	0.02	chr1	19223517	19223719	hsa-mir-1290	-	Pre-miRNA	hsa-mir-1290
chr1@19223625	0.04	chr1	19223517	19223719	hsa-mir-1290	-	Pre-miRNA	hsa-mir-1290
chr1@19223631	0.05	chr1	19223517	19223719	hsa-mir-1290	-	Pre-miRNA	hsa-mir-1290
chr1@19223632	0.04	chr1	19223517	19223719	hsa-mir-1290	-	Pre-miRNA	hsa-mir-1290
chr1@19223644	0.03	chr1	19223517	19223719	hsa-mir-1290	-	Pre-miRNA flanking region
chr1@19223645	0.03	chr1	19223517	19223719	hsa-mir-1290	-	Pre-miRNA flanking region
chr1@19223648	0.03	chr1	19223517	19223719	hsa-mir-1290	-	Pre-miRNA flanking region
chr1@19223650	0.04	chr1	19223517	19223719	hsa-mir-1290	-	Pre-miRNA flanking region
chr1@19223661	0.05	chr1	19223517	19223719	hsa-mir-1290	-	Pre-miRNA flanking region
chr1@19223678	0.03	chr1	19223517	19223719	hsa-mir-1290	-	Pre-miRNA flanking region
chr1@19223686	0.02	chr1	19223517	19223719	hsa-mir-1290	-	Pre-miRNA flanking region
chr1@19223689	0.02	chr1	19223517	19223719	hsa-mir-1290	-	Pre-miRNA flanking region
chr1@19223693	0.02	chr1	19223517	19223719	hsa-mir-1290	-	Pre-miRNA flanking region
chr1@193105553	0.02	chr1	193105512	193105777	hsa-mir-1278	+	Pre-miRNA flanking region
chr1@193105556	0.14	chr1	193105512	193105777	hsa-mir-1278	+	Pre-miRNA flanking region
chr1@193105559	0.02	chr1	193105512	193105777	hsa-mir-1278	+	Pre-miRNA flanking region
chr1@193105566	0.07	chr1	193105512	193105777	hsa-mir-1278	+	Pre-miRNA flanking region
chr1@193105567	0.17	chr1	193105512	193105777	hsa-mir-1278	+	Pre-miRNA flanking region
chr1@193105571	0.08	chr1	193105512	193105777	hsa-mir-1278	+	Pre-miRNA flanking region
chr1@193105577	0.03	chr1	193105512	193105777	hsa-mir-1278	+	Pre-miRNA flanking region
chr1@193105580	0.05	chr1	193105512	193105777	hsa-mir-1278	+	Pre-miRNA flanking region
chr1@193105582	0.02	chr1	193105512	193105777	hsa-mir-1278	+	Pre-miRNA flanking region
chr1@193105591	0.02	chr1	193105512	193105777	hsa-mir-1278	+	Pre-miRNA flanking region
chr1@193105593	0.07	chr1	193105512	193105777	hsa-mir-1278	+	Pre-miRNA flanking region
chr1@193105596	0.02	chr1	193105512	193105777	hsa-mir-1278	+	Pre-miRNA flanking region
chr1@193105597	0.03	chr1	193105512	193105777	hsa-mir-1278	+	Pre-miRNA flanking region
chr1@193105612	0.05	chr1	193105512	193105777	hsa-mir-1278	+	Pre-miRNA flanking region
chr1@193105614	0.09	chr1	193105512	193105777	hsa-mir-1278	+	Pre-miRNA flanking region
chr1@193105616	0.06	chr1	193105512	193105777	hsa-mir-1278	+	Pre-miRNA flanking region
chr1@193105624	0.05	chr1	193105512	193105777	hsa-mir-1278	+	Pre-miRNA flanking region
chr1@228284987	0.04	chr1	228284901	228285074	hsa-mir-3620	+	Pre-miRNA	hsa-mir-3620
chr1@228284992	0.03	chr1	228284901	228285074	hsa-mir-3620	+	Pre-miRNA	hsa-mir-3620
chr1@228284997	0.04	chr1	228284901	228285074	hsa-mir-3620	+	Pre-miRNA	hsa-mir-3620
chr1@228285002	0.03	chr1	228284901	228285074	hsa-mir-3620	+	Pre-miRNA	hsa-mir-3620
chr1@22959785	0.03	chr1	22959693	22959922	hsa-mir-6127	-	Pre-miRNA	hsa-mir-6127
chr1@22959795	0.02	chr1	22959693	22959922	hsa-mir-6127	-	Pre-miRNA	hsa-mir-6127
chr1@22959811	0.05	chr1	22959693	22959922	hsa-mir-6127	-	Pre-miRNA	hsa-mir-6127
chr1@22959827	0.08	chr1	22959693	22959922	hsa-mir-6127	-	Pre-miRNA	hsa-mir-6127
chr1@22959849	0.41	chr1	22959693	22959922	hsa-mir-6127	-	Pre-miRNA	hsa-mir-6127
chr1@22959869	0.05	chr1	22959693	22959922	hsa-mir-6127	-	Pre-miRNA flanking region
chr1@22959870	0.03	chr1	22959693	22959922	hsa-mir-6127	-	Pre-miRNA flanking region
chr1@22959871	0.16	chr1	22959693	22959922	hsa-mir-6127	-	Pre-miRNA flanking region
chr1@22959873	0.15	chr1	22959693	22959922	hsa-mir-6127	-	Pre-miRNA flanking region
chr1@22959876	0.12	chr1	22959693	22959922	hsa-mir-6127	-	Pre-miRNA flanking region
chr1@22959878	0.06	chr1	22959693	22959922	hsa-mir-6127	-	Pre-miRNA flanking region
chr1@22959880	0.04	chr1	22959693	22959922	hsa-mir-6127	-	Pre-miRNA flanking region
chr1@22959881	0.03	chr1	22959693	22959922	hsa-mir-6127	-	Pre-miRNA flanking region
chr1@22959889	0.03	chr1	22959693	22959922	hsa-mir-6127	-	Pre-miRNA flanking region
chr1@22959897	0.14	chr1	22959693	22959922	hsa-mir-6127	-	Pre-miRNA flanking region
chr1@241295654	0.09	chr1	241295535	241295725	hsa-mir-3123	+	Pre-miRNA flanking region
chr1@241295656	0.03	chr1	241295535	241295725	hsa-mir-3123	+	Pre-miRNA flanking region
chr1@241295657	0.03	chr1	241295535	241295725	hsa-mir-3123	+	Pre-miRNA flanking region
chr1@241295664	0.72	chr1	241295535	241295725	hsa-mir-3123	+	Pre-miRNA flanking region
chr1@241295673	0.03	chr1	241295535	241295725	hsa-mir-3123	+	Pre-miRNA flanking region
chr1@241295675	0.03	chr1	241295535	241295725	hsa-mir-3123	+	Pre-miRNA flanking region
chr1@241295678	0.04	chr1	241295535	241295725	hsa-mir-3123	+	Pre-miRNA flanking region
chr1@241295689	0.24	chr1	241295535	241295725	hsa-mir-3123	+	Pre-miRNA flanking region
chr1@241295692	0.08	chr1	241295535	241295725	hsa-mir-3123	+	Pre-miRNA flanking region
chr1@241295704	0.03	chr1	241295535	241295725	hsa-mir-3123	+	Pre-miRNA flanking region
chr1@24255613	0.05	chr1	24255499	24255684	hsa-mir-378f	+	Pre-miRNA	hsa-mir-378f
chr1@24255618	0.05	chr1	24255499	24255684	hsa-mir-378f	+	Pre-miRNA	hsa-mir-378f
chr1@24255631	0.08	chr1	24255499	24255684	hsa-mir-378f	+	Pre-miRNA	hsa-mir-378f
chr1@24255633	0.02	chr1	24255499	24255684	hsa-mir-378f	+	Pre-miRNA	hsa-mir-378f
chr1@24255639	0.14	chr1	24255499	24255684	hsa-mir-378f	+	Pre-miRNA flanking region
chr1@24255647	0.1	chr1	24255499	24255684	hsa-mir-378f	+	Pre-miRNA flanking region
chr1@24255652	0.02	chr1	24255499	24255684	hsa-mir-378f	+	Pre-miRNA flanking region
chr1@24255659	0.25	chr1	24255499	24255684	hsa-mir-378f	+	Pre-miRNA flanking region
chr1@25349968	0.03	chr1	25349931	25350116	hsa-mir-4425	+	Pre-miRNA flanking region
chr1@25349972	0.03	chr1	25349931	25350116	hsa-mir-4425	+	Pre-miRNA flanking region
chr1@25349973	0.03	chr1	25349931	25350116	hsa-mir-4425	+	Pre-miRNA flanking region
chr1@25349979	0.03	chr1	25349931	25350116	hsa-mir-4425	+	Pre-miRNA flanking region
chr1@25349980	0.08	chr1	25349931	25350116	hsa-mir-4425	+	Pre-miRNA flanking region
chr1@25349984	0.21	chr1	25349931	25350116	hsa-mir-4425	+	Pre-miRNA flanking region
chr1@25349986	0.15	chr1	25349931	25350116	hsa-mir-4425	+	Pre-miRNA flanking region
chr1@25349995	0.08	chr1	25349931	25350116	hsa-mir-4425	+	Pre-miRNA	hsa-mir-4425
chr1@25349998	0.02	chr1	25349931	25350116	hsa-mir-4425	+	Pre-miRNA	hsa-mir-4425
chr1@25350000	0.02	chr1	25349931	25350116	hsa-mir-4425	+	Pre-miRNA	hsa-mir-4425
chr1@25350004	0.04	chr1	25349931	25350116	hsa-mir-4425	+	Pre-miRNA	hsa-mir-4425
chr1@25350008	0.02	chr1	25349931	25350116	hsa-mir-4425	+	Pre-miRNA	hsa-mir-4425
chr1@25350011	0.33	chr1	25349931	25350116	hsa-mir-4425	+	Pre-miRNA	hsa-mir-4425
chr1@25350021	0.03	chr1	25349931	25350116	hsa-mir-4425	+	Pre-miRNA	hsa-mir-4425
chr1@25350040	0.11	chr1	25349931	25350116	hsa-mir-4425	+	Pre-miRNA	hsa-mir-4425
chr1@25350046	0.03	chr1	25349931	25350116	hsa-mir-4425	+	Pre-miRNA	hsa-mir-4425
chr1@25350064	0.05	chr1	25349931	25350116	hsa-mir-4425	+	Pre-miRNA	hsa-mir-4425
chr1@25350065	0.02	chr1	25349931	25350116	hsa-mir-4425	+	Pre-miRNA	hsa-mir-4425
chr1@25350068	0.12	chr1	25349931	25350116	hsa-mir-4425	+	Pre-miRNA	hsa-mir-4425
chr1@25350070	0.11	chr1	25349931	25350116	hsa-mir-4425	+	Pre-miRNA	hsa-mir-4425
chr1@25350080	0.05	chr1	25349931	25350116	hsa-mir-4425	+	Pre-miRNA flanking region
chr1@25350081	0.16	chr1	25349931	25350116	hsa-mir-4425	+	Pre-miRNA flanking region
chr1@25350087	0.03	chr1	25349931	25350116	hsa-mir-4425	+	Pre-miRNA flanking region
chr1@25350088	0.04	chr1	25349931	25350116	hsa-mir-4425	+	Pre-miRNA flanking region
chr1@51525473	0.1	chr1	51525446	51525657	hsa-mir-4421	+	Pre-miRNA flanking region
chr1@51525488	0.02	chr1	51525446	51525657	hsa-mir-4421	+	Pre-miRNA flanking region
chr1@51525490	0.04	chr1	51525446	51525657	hsa-mir-4421	+	Pre-miRNA flanking region
chr1@51525501	0.02	chr1	51525446	51525657	hsa-mir-4421	+	Pre-miRNA flanking region
chr1@51525504	0.02	chr1	51525446	51525657	hsa-mir-4421	+	Pre-miRNA flanking region
chr1@51525508	0.03	chr1	51525446	51525657	hsa-mir-4421	+	Pre-miRNA flanking region
chr1@51525510	0.05	chr1	51525446	51525657	hsa-mir-4421	+	Pre-miRNA	hsa-mir-4421
chr1@51525514	0.08	chr1	51525446	51525657	hsa-mir-4421	+	Pre-miRNA	hsa-mir-4421
chr1@51525516	0.03	chr1	51525446	51525657	hsa-mir-4421	+	Pre-miRNA	hsa-mir-4421
chr1@51525519	0.05	chr1	51525446	51525657	hsa-mir-4421	+	Pre-miRNA	hsa-mir-4421
chr1@51525520	0.04	chr1	51525446	51525657	hsa-mir-4421	+	Pre-miRNA	hsa-mir-4421
chr1@51525521	0.03	chr1	51525446	51525657	hsa-mir-4421	+	Pre-miRNA	hsa-mir-4421
chr1@51525526	0.03	chr1	51525446	51525657	hsa-mir-4421	+	Pre-miRNA	hsa-mir-4421
chr1@51525533	0.02	chr1	51525446	51525657	hsa-mir-4421	+	Pre-miRNA	hsa-mir-4421
chr1@51525540	0.03	chr1	51525446	51525657	hsa-mir-4421	+	Pre-miRNA	hsa-mir-4421
chr1@51525554	0.03	chr1	51525446	51525657	hsa-mir-4421	+	Pre-miRNA	hsa-mir-4421
chr1@51525556	0.08	chr1	51525446	51525657	hsa-mir-4421	+	Pre-miRNA	hsa-mir-4421
chr1@51525558	0.03	chr1	51525446	51525657	hsa-mir-4421	+	Pre-miRNA	hsa-mir-4421
chr1@51525560	0.11	chr1	51525446	51525657	hsa-mir-4421	+	Pre-miRNA	hsa-mir-4421
chr1@51525575	0.03	chr1	51525446	51525657	hsa-mir-4421	+	Pre-miRNA	hsa-mir-4421
chr1@51525586	0.03	chr1	51525446	51525657	hsa-mir-4421	+	Pre-miRNA flanking region
chr1@51525591	0.02	chr1	51525446	51525657	hsa-mir-4421	+	Pre-miRNA flanking region
chr1@51525596	0.03	chr1	51525446	51525657	hsa-mir-4421	+	Pre-miRNA flanking region
chr1@51525610	0.03	chr1	51525446	51525657	hsa-mir-4421	+	Pre-miRNA flanking region
chr1@51525615	0.04	chr1	51525446	51525657	hsa-mir-4421	+	Pre-miRNA flanking region
chr1@51525624	0.04	chr1	51525446	51525657	hsa-mir-4421	+	Pre-miRNA flanking region
chr1@51525663	0.04	chr1	51525641	51525841	hsa-mir-6500	+	Pre-miRNA flanking region
chr1@51525666	0.04	chr1	51525641	51525841	hsa-mir-6500	+	Pre-miRNA flanking region
chr1@51525681	0.02	chr1	51525641	51525841	hsa-mir-6500	+	Pre-miRNA flanking region
chr1@51525692	0.1	chr1	51525641	51525841	hsa-mir-6500	+	Pre-miRNA	hsa-mir-6500
chr1@51525696	0.03	chr1	51525641	51525841	hsa-mir-6500	+	Pre-miRNA	hsa-mir-6500
chr1@51525711	0.03	chr1	51525641	51525841	hsa-mir-6500	+	Pre-miRNA	hsa-mir-6500
chr1@51525716	0.11	chr1	51525641	51525841	hsa-mir-6500	+	Pre-miRNA	hsa-mir-6500
chr1@51525724	0.05	chr1	51525641	51525841	hsa-mir-6500	+	Pre-miRNA	hsa-mir-6500
chr1@51525727	0.04	chr1	51525641	51525841	hsa-mir-6500	+	Pre-miRNA	hsa-mir-6500
chr1@51525728	0.02	chr1	51525641	51525841	hsa-mir-6500	+	Pre-miRNA	hsa-mir-6500
chr1@51525729	0.04	chr1	51525641	51525841	hsa-mir-6500	+	Pre-miRNA	hsa-mir-6500
chr1@51525731	0.03	chr1	51525641	51525841	hsa-mir-6500	+	Pre-miRNA	hsa-mir-6500
chr1@51525732	0.04	chr1	51525641	51525841	hsa-mir-6500	+	Pre-miRNA	hsa-mir-6500
chr1@51525741	0.03	chr1	51525641	51525841	hsa-mir-6500	+	Pre-miRNA	hsa-mir-6500
chr1@51525748	0.07	chr1	51525641	51525841	hsa-mir-6500	+	Pre-miRNA	hsa-mir-6500
chr1@51525751	0.02	chr1	51525641	51525841	hsa-mir-6500	+	Pre-miRNA	hsa-mir-6500
chr1@51525762	0.11	chr1	51525641	51525841	hsa-mir-6500	+	Pre-miRNA	hsa-mir-6500
chr1@51525772	0.04	chr1	51525641	51525841	hsa-mir-6500	+	Pre-miRNA	hsa-mir-6500
chr1@51525788	0.04	chr1	51525641	51525841	hsa-mir-6500	+	Pre-miRNA flanking region
chr1@51525791	0.03	chr1	51525641	51525841	hsa-mir-6500	+	Pre-miRNA flanking region
chr1@51525793	0.03	chr1	51525641	51525841	hsa-mir-6500	+	Pre-miRNA flanking region
chr1@51525796	0.05	chr1	51525641	51525841	hsa-mir-6500	+	Pre-miRNA flanking region
chr1@51525798	0.03	chr1	51525641	51525841	hsa-mir-6500	+	Pre-miRNA flanking region
chr1@51525810	0.13	chr1	51525641	51525841	hsa-mir-6500	+	Pre-miRNA flanking region
chr1@51525818	0.08	chr1	51525641	51525841	hsa-mir-6500	+	Pre-miRNA flanking region
chr1@95211381	0.02	chr1	95211342	95211516	hsa-mir-378g	-	Pre-miRNA flanking region
chr1@95211448	0.03	chr1	95211342	95211516	hsa-mir-378g	-	Pre-miRNA	hsa-mir-378g
chr20@37145221	0.04	chr20	37145124	37145386	hsa-mir-548o-2	+	Pre-miRNA	hsa-mir-548o-2
chr20@37145235	0.02	chr20	37145124	37145386	hsa-mir-548o-2	+	Pre-miRNA	hsa-mir-548o-2
chr20@37145269	0.03	chr20	37145124	37145386	hsa-mir-548o-2	+	Pre-miRNA	hsa-mir-548o-2
chr20@59139616	0.03	chr20	59139579	59139749	hsa-mir-548ag-2	+	Pre-miRNA flanking region
chr20@59139617	0.07	chr20	59139579	59139749	hsa-mir-548ag-2	+	Pre-miRNA flanking region
chr20@59139620	0.02	chr20	59139579	59139749	hsa-mir-548ag-2	+	Pre-miRNA	hsa-mir-548ag-2
chr20@59139631	0.03	chr20	59139579	59139749	hsa-mir-548ag-2	+	Pre-miRNA	hsa-mir-548ag-2
chr20@59139634	0.03	chr20	59139579	59139749	hsa-mir-548ag-2	+	Pre-miRNA	hsa-mir-548ag-2
chr20@59139639	0.03	chr20	59139579	59139749	hsa-mir-548ag-2	+	Pre-miRNA	hsa-mir-548ag-2
chr20@59139667	0.03	chr20	59139579	59139749	hsa-mir-548ag-2	+	Pre-miRNA	hsa-mir-548ag-2
chr20@59139678	0.02	chr20	59139579	59139749	hsa-mir-548ag-2	+	Pre-miRNA	hsa-mir-548ag-2
chr20@59139688	0.05	chr20	59139579	59139749	hsa-mir-548ag-2	+	Pre-miRNA flanking region
chr21@20058394	0.02	chr21	20058341	20058532	hsa-mir-548x	-	Pre-miRNA flanking region
chr21@20058402	0.03	chr21	20058341	20058532	hsa-mir-548x	-	Pre-miRNA flanking region
chr21@20058407	0.39	chr21	20058341	20058532	hsa-mir-548x	-	Pre-miRNA flanking region
chr21@20058410	0.12	chr21	20058341	20058532	hsa-mir-548x	-	Pre-miRNA	hsa-mir-548x
chr21@20058440	0.11	chr21	20058341	20058532	hsa-mir-548x	-	Pre-miRNA	hsa-mir-548x
chr21@20058449	0.12	chr21	20058341	20058532	hsa-mir-548x	-	Pre-miRNA	hsa-mir-548x
chr21@20058455	0.09	chr21	20058341	20058532	hsa-mir-548x	-	Pre-miRNA	hsa-mir-548x
chr21@20058488	0.05	chr21	20058341	20058532	hsa-mir-548x	-	Pre-miRNA flanking region
chr21@20058511	0.08	chr21	20058341	20058532	hsa-mir-548x	-	Pre-miRNA flanking region
chr21@24451575	0.02	chr21	24451542	24451785	hsa-mir-6130	+	Pre-miRNA flanking region
chr21@24451582	0.12	chr21	24451542	24451785	hsa-mir-6130	+	Pre-miRNA flanking region
chr21@24451594	0.35	chr21	24451542	24451785	hsa-mir-6130	+	Pre-miRNA flanking region
chr21@24451621	0.04	chr21	24451542	24451785	hsa-mir-6130	+	Pre-miRNA	hsa-mir-6130
chr21@24451676	0.09	chr21	24451542	24451785	hsa-mir-6130	+	Pre-miRNA	hsa-mir-6130
chr22@22007688	0.02	chr22	22007538	22007720	hsa-mir-130b	+	Pre-miRNA flanking region
chr22@23228404	0.11	chr22	23228378	23228636	hsa-mir-5571	+	Pre-miRNA flanking region
chr22@23228411	0.06	chr22	23228378	23228636	hsa-mir-5571	+	Pre-miRNA flanking region
chr22@23228417	0.09	chr22	23228378	23228636	hsa-mir-5571	+	Pre-miRNA flanking region
chr22@23228425	0.08	chr22	23228378	23228636	hsa-mir-5571	+	Pre-miRNA flanking region
chr22@23228429	0.12	chr22	23228378	23228636	hsa-mir-5571	+	Pre-miRNA flanking region
chr22@23228446	0.06	chr22	23228378	23228636	hsa-mir-5571	+	Pre-miRNA flanking region
chr22@23228450	0.02	chr22	23228378	23228636	hsa-mir-5571	+	Pre-miRNA	hsa-mir-5571
chr22@23228474	0.08	chr22	23228378	23228636	hsa-mir-5571	+	Pre-miRNA	hsa-mir-5571
chr22@23228477	0.06	chr22	23228378	23228636	hsa-mir-5571	+	Pre-miRNA	hsa-mir-5571
chr22@23228498	0.04	chr22	23228378	23228636	hsa-mir-5571	+	Pre-miRNA	hsa-mir-5571
chr22@23228523	0.04	chr22	23228378	23228636	hsa-mir-5571	+	Pre-miRNA	hsa-mir-5571
chr22@23228526	0.03	chr22	23228378	23228636	hsa-mir-5571	+	Pre-miRNA	hsa-mir-5571
chr22@26951214	0.03	chr22	26951152	26951366	hsa-mir-548j	-	Pre-miRNA	hsa-mir-548j
chr22@26951228	0.03	chr22	26951152	26951366	hsa-mir-548j	-	Pre-miRNA	hsa-mir-548j
chr22@26951253	0.04	chr22	26951152	26951366	hsa-mir-548j	-	Pre-miRNA	hsa-mir-548j
chr22@31127510	0.02	chr22	31127470	31127672	hsa-mir-3200	+	Pre-miRNA flanking region
chr22@31127549	0.2	chr22	31127470	31127672	hsa-mir-3200	+	Pre-miRNA	hsa-mir-3200
chr22@31127558	0.04	chr22	31127470	31127672	hsa-mir-3200	+	Pre-miRNA	hsa-mir-3200
chr22@31127579	0.05	chr22	31127470	31127672	hsa-mir-3200	+	Pre-miRNA	hsa-mir-3200
chr22@31127581	0.11	chr22	31127470	31127672	hsa-mir-3200	+	Pre-miRNA	hsa-mir-3200
chr22@31127588	0.07	chr22	31127470	31127672	hsa-mir-3200	+	Pre-miRNA	hsa-mir-3200
chr22@31556018	0.04	chr22	31555989	31556183	hsa-mir-3928	-	Pre-miRNA flanking region
chr22@35731671	0.02	chr22	35731579	35731775	hsa-mir-3909	+	Pre-miRNA	hsa-mir-3909
chr22@38243605	0.03	chr22	38243570	38243841	hsa-mir-659	-	Pre-miRNA flanking region
chr22@38243616	0.03	chr22	38243570	38243841	hsa-mir-659	-	Pre-miRNA flanking region
chr22@38243634	0.02	chr22	38243570	38243841	hsa-mir-659	-	Pre-miRNA flanking region
chr22@38243674	0.04	chr22	38243570	38243841	hsa-mir-659	-	Pre-miRNA flanking region
chr22@38243681	0.04	chr22	38243570	38243841	hsa-mir-659	-	Pre-miRNA flanking region
chr22@38243684	0.05	chr22	38243570	38243841	hsa-mir-659	-	Pre-miRNA flanking region
chr22@38243705	0.06	chr22	38243570	38243841	hsa-mir-659	-	Pre-miRNA	hsa-mir-659
chr22@38243716	0.02	chr22	38243570	38243841	hsa-mir-659	-	Pre-miRNA	hsa-mir-659
chr22@38243720	0.03	chr22	38243570	38243841	hsa-mir-659	-	Pre-miRNA	hsa-mir-659
chr22@38243724	0.03	chr22	38243570	38243841	hsa-mir-659	-	Pre-miRNA	hsa-mir-659
chr22@38243728	0.11	chr22	38243570	38243841	hsa-mir-659	-	Pre-miRNA	hsa-mir-659
chr22@42319206	0.02	chr22	42319149	42319326	hsa-mir-378i	-	Pre-miRNA flanking region
chr22@42319222	0.04	chr22	42319149	42319326	hsa-mir-378i	-	Pre-miRNA flanking region
chr22@42319227	0.02	chr22	42319149	42319326	hsa-mir-378i	-	Pre-miRNA	hsa-mir-378i
chr22@42319230	0.03	chr22	42319149	42319326	hsa-mir-378i	-	Pre-miRNA	hsa-mir-378i
chr22@42319259	0.03	chr22	42319149	42319326	hsa-mir-378i	-	Pre-miRNA	hsa-mir-378i
chr22@45596828	0.02	chr22	45596806	45597077	hsa-mir-1249	-	Pre-miRNA flanking region
chr22@49937019	0.14	chr22	49936991	49937177	hsa-mir-3667	-	Pre-miRNA flanking region
chr22@49937031	0.3	chr22	49936991	49937177	hsa-mir-3667	-	Pre-miRNA flanking region
chr22@49937032	0.34	chr22	49936991	49937177	hsa-mir-3667	-	Pre-miRNA flanking region
chr22@49937051	0.05	chr22	49936991	49937177	hsa-mir-3667	-	Pre-miRNA	hsa-mir-3667
chr22@49937053	0.07	chr22	49936991	49937177	hsa-mir-3667	-	Pre-miRNA	hsa-mir-3667
chr22@49937057	0.05	chr22	49936991	49937177	hsa-mir-3667	-	Pre-miRNA	hsa-mir-3667
chr22@49937063	0.07	chr22	49936991	49937177	hsa-mir-3667	-	Pre-miRNA	hsa-mir-3667
chr22@49937066	0.24	chr22	49936991	49937177	hsa-mir-3667	-	Pre-miRNA	hsa-mir-3667
chr22@49937075	0.09	chr22	49936991	49937177	hsa-mir-3667	-	Pre-miRNA	hsa-mir-3667
chr22@49937082	0.03	chr22	49936991	49937177	hsa-mir-3667	-	Pre-miRNA	hsa-mir-3667
chr22@49937084	0.03	chr22	49936991	49937177	hsa-mir-3667	-	Pre-miRNA	hsa-mir-3667
chr22@49937085	0.03	chr22	49936991	49937177	hsa-mir-3667	-	Pre-miRNA	hsa-mir-3667
chr22@49937116	0.28	chr22	49936991	49937177	hsa-mir-3667	-	Pre-miRNA flanking region
chr22@49937119	0.03	chr22	49936991	49937177	hsa-mir-3667	-	Pre-miRNA flanking region
chr22@49937127	0.07	chr22	49936991	49937177	hsa-mir-3667	-	Pre-miRNA flanking region
chr22@49937128	0.22	chr22	49936991	49937177	hsa-mir-3667	-	Pre-miRNA flanking region
chr22@49937143	0.07	chr22	49936991	49937177	hsa-mir-3667	-	Pre-miRNA flanking region
chr22@49937150	0.02	chr22	49936991	49937177	hsa-mir-3667	-	Pre-miRNA flanking region
chr22@49937155	0.1	chr22	49936991	49937177	hsa-mir-3667	-	Pre-miRNA flanking region
chr2@103048716	0.12	chr2	103048691	103048873	hsa-mir-4772	+	Pre-miRNA flanking region
chr2@103048723	0.04	chr2	103048691	103048873	hsa-mir-4772	+	Pre-miRNA flanking region
chr2@103048729	0.07	chr2	103048691	103048873	hsa-mir-4772	+	Pre-miRNA flanking region
chr2@103048733	0.05	chr2	103048691	103048873	hsa-mir-4772	+	Pre-miRNA flanking region
chr2@103048737	0.02	chr2	103048691	103048873	hsa-mir-4772	+	Pre-miRNA flanking region
chr2@103048746	0.02	chr2	103048691	103048873	hsa-mir-4772	+	Pre-miRNA flanking region
chr2@103048748	0.04	chr2	103048691	103048873	hsa-mir-4772	+	Pre-miRNA flanking region
chr2@103048750	0.06	chr2	103048691	103048873	hsa-mir-4772	+	Pre-miRNA	hsa-mir-4772
chr2@103048753	0.03	chr2	103048691	103048873	hsa-mir-4772	+	Pre-miRNA	hsa-mir-4772
chr2@103048754	0.03	chr2	103048691	103048873	hsa-mir-4772	+	Pre-miRNA	hsa-mir-4772
chr2@103048758	0.08	chr2	103048691	103048873	hsa-mir-4772	+	Pre-miRNA	hsa-mir-4772
chr2@103048763	0.03	chr2	103048691	103048873	hsa-mir-4772	+	Pre-miRNA	hsa-mir-4772
chr2@103048773	0.08	chr2	103048691	103048873	hsa-mir-4772	+	Pre-miRNA	hsa-mir-4772
chr2@11907514	0.03	chr2	11907493	11907685	hsa-mir-548s	+	Pre-miRNA flanking region
chr2@11907565	0.03	chr2	11907493	11907685	hsa-mir-548s	+	Pre-miRNA flanking region
chr2@11907570	0.03	chr2	11907493	11907685	hsa-mir-548s	+	Pre-miRNA	hsa-mir-548s
chr2@11907571	0.03	chr2	11907493	11907685	hsa-mir-548s	+	Pre-miRNA	hsa-mir-548s
chr2@11907638	0.04	chr2	11907493	11907685	hsa-mir-548s	+	Pre-miRNA	hsa-mir-548s
chr2@11907641	0.02	chr2	11907493	11907685	hsa-mir-548s	+	Pre-miRNA	hsa-mir-548s
chr2@177465671	0.05	chr2	177465645	177465827	hsa-mir-1246	-	Pre-miRNA flanking region
chr2@177465674	0.04	chr2	177465645	177465827	hsa-mir-1246	-	Pre-miRNA flanking region
chr2@177465700	0.03	chr2	177465645	177465827	hsa-mir-1246	-	Pre-miRNA flanking region
chr2@177465708	0.07	chr2	177465645	177465827	hsa-mir-1246	-	Pre-miRNA	hsa-mir-1246
chr2@177465714	0.36	chr2	177465645	177465827	hsa-mir-1246	-	Pre-miRNA	hsa-mir-1246
chr2@177465741	0.04	chr2	177465645	177465827	hsa-mir-1246	-	Pre-miRNA	hsa-mir-1246
chr2@177465749	0.08	chr2	177465645	177465827	hsa-mir-1246	-	Pre-miRNA	hsa-mir-1246
chr2@185243648	0.04	chr2	185243627	185243796	hsa-mir-548ae-1	+	Pre-miRNA flanking region
chr2@185243653	0.06	chr2	185243627	185243796	hsa-mir-548ae-1	+	Pre-miRNA flanking region
chr2@185243656	0.03	chr2	185243627	185243796	hsa-mir-548ae-1	+	Pre-miRNA flanking region
chr2@185243658	0.05	chr2	185243627	185243796	hsa-mir-548ae-1	+	Pre-miRNA flanking region
chr2@185243706	0.03	chr2	185243627	185243796	hsa-mir-548ae-1	+	Pre-miRNA	hsa-mir-548ae-1
chr2@185243707	0.12	chr2	185243627	185243796	hsa-mir-548ae-1	+	Pre-miRNA	hsa-mir-548ae-1
chr2@185243721	0.06	chr2	185243627	185243796	hsa-mir-548ae-1	+	Pre-miRNA	hsa-mir-548ae-1
chr2@185243727	0.02	chr2	185243627	185243796	hsa-mir-548ae-1	+	Pre-miRNA	hsa-mir-548ae-1
chr2@185243729	0.04	chr2	185243627	185243796	hsa-mir-548ae-1	+	Pre-miRNA	hsa-mir-548ae-1
chr2@185243735	0.05	chr2	185243627	185243796	hsa-mir-548ae-1	+	Pre-miRNA	hsa-mir-548ae-1
chr2@185243751	0.06	chr2	185243627	185243796	hsa-mir-548ae-1	+	Pre-miRNA	hsa-mir-548ae-1
chr2@185243756	0.03	chr2	185243627	185243796	hsa-mir-548ae-1	+	Pre-miRNA	hsa-mir-548ae-1
chr2@185243757	0.03	chr2	185243627	185243796	hsa-mir-548ae-1	+	Pre-miRNA	hsa-mir-548ae-1
chr2@185243760	0.11	chr2	185243627	185243796	hsa-mir-548ae-1	+	Pre-miRNA	hsa-mir-548ae-1
chr2@185243762	0.03	chr2	185243627	185243796	hsa-mir-548ae-1	+	Pre-miRNA	hsa-mir-548ae-1
chr2@185243769	0.06	chr2	185243627	185243796	hsa-mir-548ae-1	+	Pre-miRNA	hsa-mir-548ae-1
chr2@185243773	0.03	chr2	185243627	185243796	hsa-mir-548ae-1	+	Pre-miRNA flanking region
chr2@189860401	0.03	chr2	189860326	189860492	hsa-mir-3606	+	Pre-miRNA	hsa-mir-3606
chr2@213290998	0.04	chr2	213290907	213291126	hsa-mir-548f-2	-	Pre-miRNA	hsa-mir-548f-2
chr2@213291009	0.04	chr2	213290907	213291126	hsa-mir-548f-2	-	Pre-miRNA	hsa-mir-548f-2
chr2@213291015	0.03	chr2	213290907	213291126	hsa-mir-548f-2	-	Pre-miRNA	hsa-mir-548f-2
chr2@213291018	0.03	chr2	213290907	213291126	hsa-mir-548f-2	-	Pre-miRNA	hsa-mir-548f-2
chr2@213291036	0.05	chr2	213290907	213291126	hsa-mir-548f-2	-	Pre-miRNA	hsa-mir-548f-2
chr2@213291043	0.04	chr2	213290907	213291126	hsa-mir-548f-2	-	Pre-miRNA	hsa-mir-548f-2
chr2@213291055	0.08	chr2	213290907	213291126	hsa-mir-548f-2	-	Pre-miRNA	hsa-mir-548f-2
chr2@213291070	0.11	chr2	213290907	213291126	hsa-mir-548f-2	-	Pre-miRNA	hsa-mir-548f-2
chr2@220158925	0.02	chr2	220158753	220158981	hsa-mir-153-1	-	Pre-miRNA flanking region
chr2@220158927	0.03	chr2	220158753	220158981	hsa-mir-153-1	-	Pre-miRNA flanking region
chr2@220158931	0.04	chr2	220158753	220158981	hsa-mir-153-1	-	Pre-miRNA flanking region
chr2@220158933	0.03	chr2	220158753	220158981	hsa-mir-153-1	-	Pre-miRNA flanking region
chr2@220158934	0.07	chr2	220158753	220158981	hsa-mir-153-1	-	Pre-miRNA flanking region
chr2@220158937	0.29	chr2	220158753	220158981	hsa-mir-153-1	-	Pre-miRNA flanking region
chr2@220158941	0.02	chr2	220158753	220158981	hsa-mir-153-1	-	Pre-miRNA flanking region
chr2@220158942	0.06	chr2	220158753	220158981	hsa-mir-153-1	-	Pre-miRNA flanking region
chr2@220158949	0.05	chr2	220158753	220158981	hsa-mir-153-1	-	Pre-miRNA flanking region
chr2@220158951	0.06	chr2	220158753	220158981	hsa-mir-153-1	-	Pre-miRNA flanking region
chr2@220158955	0.03	chr2	220158753	220158981	hsa-mir-153-1	-	Pre-miRNA flanking region
chr2@220158956	0.02	chr2	220158753	220158981	hsa-mir-153-1	-	Pre-miRNA flanking region
chr2@220158959	0.03	chr2	220158753	220158981	hsa-mir-153-1	-	Pre-miRNA flanking region
chr2@32757211	0.02	chr2	32757188	32757389	hsa-mir-558	+	Pre-miRNA flanking region
chr2@32757217	0.03	chr2	32757188	32757389	hsa-mir-558	+	Pre-miRNA flanking region
chr2@32757235	0.03	chr2	32757188	32757389	hsa-mir-558	+	Pre-miRNA	hsa-mir-558
chr2@32757276	0.03	chr2	32757188	32757389	hsa-mir-558	+	Pre-miRNA	hsa-mir-558
chr2@32757277	0.1	chr2	32757188	32757389	hsa-mir-558	+	Pre-miRNA	hsa-mir-558
chr2@32757288	0.03	chr2	32757188	32757389	hsa-mir-558	+	Pre-miRNA	hsa-mir-558
chr2@32757290	0.04	chr2	32757188	32757389	hsa-mir-558	+	Pre-miRNA	hsa-mir-558
chr2@32757336	0.04	chr2	32757188	32757389	hsa-mir-558	+	Pre-miRNA flanking region
chr2@32757338	0.35	chr2	32757188	32757389	hsa-mir-558	+	Pre-miRNA flanking region
chr2@32757355	0.06	chr2	32757188	32757389	hsa-mir-558	+	Pre-miRNA flanking region
chr2@32757361	0.02	chr2	32757188	32757389	hsa-mir-558	+	Pre-miRNA flanking region
chr2@35696479	0.03	chr2	35696396	35696580	hsa-mir-548ad	+	Pre-miRNA	hsa-mir-548ad
chr2@35696491	0.03	chr2	35696396	35696580	hsa-mir-548ad	+	Pre-miRNA	hsa-mir-548ad
chr2@35696502	0.26	chr2	35696396	35696580	hsa-mir-548ad	+	Pre-miRNA	hsa-mir-548ad
chr2@35696504	0.27	chr2	35696396	35696580	hsa-mir-548ad	+	Pre-miRNA	hsa-mir-548ad
chr2@35696514	0.07	chr2	35696396	35696580	hsa-mir-548ad	+	Pre-miRNA	hsa-mir-548ad
chr2@35696515	0.06	chr2	35696396	35696580	hsa-mir-548ad	+	Pre-miRNA	hsa-mir-548ad
chr2@35696536	0.04	chr2	35696396	35696580	hsa-mir-548ad	+	Pre-miRNA	hsa-mir-548ad
chr2@35696547	0.33	chr2	35696396	35696580	hsa-mir-548ad	+	Pre-miRNA	hsa-mir-548ad
chr2@52929626	0.05	chr2	52929592	52929818	hsa-mir-4431	-	Pre-miRNA flanking region
chr2@52929628	0.07	chr2	52929592	52929818	hsa-mir-4431	-	Pre-miRNA flanking region
chr2@52929644	0.08	chr2	52929592	52929818	hsa-mir-4431	-	Pre-miRNA flanking region
chr2@52929649	0.8	chr2	52929592	52929818	hsa-mir-4431	-	Pre-miRNA flanking region
chr2@52929657	0.31	chr2	52929592	52929818	hsa-mir-4431	-	Pre-miRNA flanking region
chr2@52929665	0.06	chr2	52929592	52929818	hsa-mir-4431	-	Pre-miRNA	hsa-mir-4431
chr2@52929666	0.05	chr2	52929592	52929818	hsa-mir-4431	-	Pre-miRNA	hsa-mir-4431
chr2@52929669	0.02	chr2	52929592	52929818	hsa-mir-4431	-	Pre-miRNA	hsa-mir-4431
chr2@52929675	0.08	chr2	52929592	52929818	hsa-mir-4431	-	Pre-miRNA	hsa-mir-4431
chr2@52929677	0.07	chr2	52929592	52929818	hsa-mir-4431	-	Pre-miRNA	hsa-mir-4431
chr2@52929681	0.16	chr2	52929592	52929818	hsa-mir-4431	-	Pre-miRNA	hsa-mir-4431
chr2@52929685	0.37	chr2	52929592	52929818	hsa-mir-4431	-	Pre-miRNA	hsa-mir-4431
chr2@52929690	0.1	chr2	52929592	52929818	hsa-mir-4431	-	Pre-miRNA	hsa-mir-4431
chr2@52929708	0.12	chr2	52929592	52929818	hsa-mir-4431	-	Pre-miRNA	hsa-mir-4431
chr2@52929710	0.04	chr2	52929592	52929818	hsa-mir-4431	-	Pre-miRNA	hsa-mir-4431
chr2@52929711	0.03	chr2	52929592	52929818	hsa-mir-4431	-	Pre-miRNA	hsa-mir-4431
chr2@52929712	0.17	chr2	52929592	52929818	hsa-mir-4431	-	Pre-miRNA	hsa-mir-4431
chr2@52929722	0.02	chr2	52929592	52929818	hsa-mir-4431	-	Pre-miRNA	hsa-mir-4431
chr2@52929724	0.25	chr2	52929592	52929818	hsa-mir-4431	-	Pre-miRNA	hsa-mir-4431
chr2@52929726	0.09	chr2	52929592	52929818	hsa-mir-4431	-	Pre-miRNA	hsa-mir-4431
chr2@52929733	0.45	chr2	52929592	52929818	hsa-mir-4431	-	Pre-miRNA	hsa-mir-4431
chr2@52929749	0.02	chr2	52929592	52929818	hsa-mir-4431	-	Pre-miRNA	hsa-mir-4431
chr2@52929750	0.04	chr2	52929592	52929818	hsa-mir-4431	-	Pre-miRNA	hsa-mir-4431
chr2@52929758	0.04	chr2	52929592	52929818	hsa-mir-4431	-	Pre-miRNA flanking region
chr2@52929759	0.04	chr2	52929592	52929818	hsa-mir-4431	-	Pre-miRNA flanking region
chr2@52929779	0.06	chr2	52929592	52929818	hsa-mir-4431	-	Pre-miRNA flanking region
chr3@103242876	0.17	chr3	103242829	103243037	hsa-mir-548ab	-	Pre-miRNA flanking region
chr3@103242887	0.03	chr3	103242829	103243037	hsa-mir-548ab	-	Pre-miRNA	hsa-mir-548ab
chr3@103242917	0.03	chr3	103242829	103243037	hsa-mir-548ab	-	Pre-miRNA	hsa-mir-548ab
chr3@103242932	0.02	chr3	103242829	103243037	hsa-mir-548ab	-	Pre-miRNA	hsa-mir-548ab
chr3@103242939	0.1	chr3	103242829	103243037	hsa-mir-548ab	-	Pre-miRNA	hsa-mir-548ab
chr3@103242956	0.02	chr3	103242829	103243037	hsa-mir-548ab	-	Pre-miRNA	hsa-mir-548ab
chr3@10371870	0.03	chr3	10371846	10372030	hsa-mir-378b	+	Pre-miRNA flanking region
chr3@10371885	0.04	chr3	10371846	10372030	hsa-mir-378b	+	Pre-miRNA flanking region
chr3@10371886	0.02	chr3	10371846	10372030	hsa-mir-378b	+	Pre-miRNA flanking region
chr3@10371889	0.05	chr3	10371846	10372030	hsa-mir-378b	+	Pre-miRNA flanking region
chr3@10371894	0.03	chr3	10371846	10372030	hsa-mir-378b	+	Pre-miRNA flanking region
chr3@10371915	0.03	chr3	10371846	10372030	hsa-mir-378b	+	Pre-miRNA	hsa-mir-378b
chr3@10371954	0.07	chr3	10371846	10372030	hsa-mir-378b	+	Pre-miRNA	hsa-mir-378b
chr3@10371974	0.03	chr3	10371846	10372030	hsa-mir-378b	+	Pre-miRNA flanking region
chr3@10371975	0.03	chr3	10371846	10372030	hsa-mir-378b	+	Pre-miRNA flanking region
chr3@10371986	0.02	chr3	10371846	10372030	hsa-mir-378b	+	Pre-miRNA flanking region
chr3@10371995	0.03	chr3	10371846	10372030	hsa-mir-378b	+	Pre-miRNA flanking region
chr3@10372004	0.03	chr3	10371846	10372030	hsa-mir-378b	+	Pre-miRNA flanking region
chr3@10372005	0.03	chr3	10371846	10372030	hsa-mir-378b	+	Pre-miRNA flanking region
chr3@10372009	0.02	chr3	10371846	10372030	hsa-mir-378b	+	Pre-miRNA flanking region
chr3@10436152	0.1	chr3	10436110	10436303	hsa-mir-885	-	Pre-miRNA flanking region
chr3@10436160	0.02	chr3	10436110	10436303	hsa-mir-885	-	Pre-miRNA flanking region
chr3@10436173	0.1	chr3	10436110	10436303	hsa-mir-885	-	Pre-miRNA	hsa-mir-885
chr3@10436184	0.07	chr3	10436110	10436303	hsa-mir-885	-	Pre-miRNA	hsa-mir-885
chr3@10436193	0.12	chr3	10436110	10436303	hsa-mir-885	-	Pre-miRNA	hsa-mir-885
chr3@124451291	0.1	chr3	124451237	124451411	hsa-mir-544b	+	Pre-miRNA	hsa-mir-544b
chr3@124451292	0.03	chr3	124451237	124451411	hsa-mir-544b	+	Pre-miRNA	hsa-mir-544b
chr3@124451308	0.07	chr3	124451237	124451411	hsa-mir-544b	+	Pre-miRNA	hsa-mir-544b
chr3@124451316	0.03	chr3	124451237	124451411	hsa-mir-544b	+	Pre-miRNA	hsa-mir-544b
chr3@124451342	0.03	chr3	124451237	124451411	hsa-mir-544b	+	Pre-miRNA	hsa-mir-544b
chr3@124451344	0.06	chr3	124451237	124451411	hsa-mir-544b	+	Pre-miRNA	hsa-mir-544b
chr3@124451360	0.02	chr3	124451237	124451411	hsa-mir-544b	+	Pre-miRNA	hsa-mir-544b
chr3@183604593	0.11	chr3	183604556	183604729	hsa-mir-4448	+	Pre-miRNA	hsa-mir-4448
chr3@183604610	0.03	chr3	183604556	183604729	hsa-mir-4448	+	Pre-miRNA	hsa-mir-4448
chr3@183604618	0.07	chr3	183604556	183604729	hsa-mir-4448	+	Pre-miRNA	hsa-mir-4448
chr3@183604623	0.03	chr3	183604556	183604729	hsa-mir-4448	+	Pre-miRNA	hsa-mir-4448
chr3@183604626	0.02	chr3	183604556	183604729	hsa-mir-4448	+	Pre-miRNA	hsa-mir-4448
chr3@183604654	0.06	chr3	183604556	183604729	hsa-mir-4448	+	Pre-miRNA	hsa-mir-4448
chr3@183604658	0.12	chr3	183604556	183604729	hsa-mir-4448	+	Pre-miRNA	hsa-mir-4448
chr3@183604677	0.04	chr3	183604556	183604729	hsa-mir-4448	+	Pre-miRNA flanking region
chr3@183604694	0.02	chr3	183604556	183604729	hsa-mir-4448	+	Pre-miRNA flanking region
chr3@183604708	0.03	chr3	183604556	183604729	hsa-mir-4448	+	Pre-miRNA flanking region
chr3@184971022	0.06	chr3	184970969	184971144	hsa-mir-5588	-	Pre-miRNA	hsa-mir-5588
chr3@184971034	0.02	chr3	184970969	184971144	hsa-mir-5588	-	Pre-miRNA	hsa-mir-5588
chr3@185485597	0.06	chr3	185485560	185485809	hsa-mir-548aq	-	Pre-miRNA flanking region
chr3@185485640	0.06	chr3	185485560	185485809	hsa-mir-548aq	-	Pre-miRNA	hsa-mir-548aq
chr3@185485644	0.03	chr3	185485560	185485809	hsa-mir-548aq	-	Pre-miRNA	hsa-mir-548aq
chr3@185485663	0.04	chr3	185485560	185485809	hsa-mir-548aq	-	Pre-miRNA	hsa-mir-548aq
chr3@185485664	0.05	chr3	185485560	185485809	hsa-mir-548aq	-	Pre-miRNA	hsa-mir-548aq
chr3@185485665	0.04	chr3	185485560	185485809	hsa-mir-548aq	-	Pre-miRNA	hsa-mir-548aq
chr3@185485668	0.03	chr3	185485560	185485809	hsa-mir-548aq	-	Pre-miRNA	hsa-mir-548aq
chr3@185485695	0.04	chr3	185485560	185485809	hsa-mir-548aq	-	Pre-miRNA flanking region
chr3@185485699	0.02	chr3	185485560	185485809	hsa-mir-548aq	-	Pre-miRNA flanking region
chr3@185485703	0.05	chr3	185485560	185485809	hsa-mir-548aq	-	Pre-miRNA flanking region
chr3@185485720	0.11	chr3	185485560	185485809	hsa-mir-548aq	-	Pre-miRNA flanking region
chr3@185485731	0.18	chr3	185485560	185485809	hsa-mir-548aq	-	Pre-miRNA flanking region
chr3@185485739	0.02	chr3	185485560	185485809	hsa-mir-548aq	-	Pre-miRNA flanking region
chr3@188406543	0.04	chr3	188406511	188406716	hsa-mir-28	+	Pre-miRNA flanking region
chr3@188406571	0.02	chr3	188406511	188406716	hsa-mir-28	+	Pre-miRNA	hsa-mir-28
chr3@188406597	0.02	chr3	188406511	188406716	hsa-mir-28	+	Pre-miRNA	hsa-mir-28
chr3@188406604	0.03	chr3	188406511	188406716	hsa-mir-28	+	Pre-miRNA	hsa-mir-28
chr3@188406609	0.05	chr3	188406511	188406716	hsa-mir-28	+	Pre-miRNA	hsa-mir-28
chr3@188406610	0.05	chr3	188406511	188406716	hsa-mir-28	+	Pre-miRNA	hsa-mir-28
chr3@188406613	0.04	chr3	188406511	188406716	hsa-mir-28	+	Pre-miRNA	hsa-mir-28
chr3@188406619	0.03	chr3	188406511	188406716	hsa-mir-28	+	Pre-miRNA	hsa-mir-28
chr3@188406632	0.14	chr3	188406511	188406716	hsa-mir-28	+	Pre-miRNA	hsa-mir-28
chr3@188406640	0.04	chr3	188406511	188406716	hsa-mir-28	+	Pre-miRNA	hsa-mir-28
chr3@188406654	0.03	chr3	188406511	188406716	hsa-mir-28	+	Pre-miRNA	hsa-mir-28
chr3@188406656	0.05	chr3	188406511	188406716	hsa-mir-28	+	Pre-miRNA flanking region
chr3@188406659	0.07	chr3	188406511	188406716	hsa-mir-28	+	Pre-miRNA flanking region
chr3@188406665	0.03	chr3	188406511	188406716	hsa-mir-28	+	Pre-miRNA flanking region
chr3@188406676	0.06	chr3	188406511	188406716	hsa-mir-28	+	Pre-miRNA flanking region
chr3@188406681	0.03	chr3	188406511	188406716	hsa-mir-28	+	Pre-miRNA flanking region
chr3@32547738	0.03	chr3	32547715	32547943	hsa-mir-548ay	-	Pre-miRNA flanking region
chr3@32547754	0.03	chr3	32547715	32547943	hsa-mir-548ay	-	Pre-miRNA flanking region
chr3@32547767	0.02	chr3	32547715	32547943	hsa-mir-548ay	-	Pre-miRNA flanking region
chr3@32547774	0.04	chr3	32547715	32547943	hsa-mir-548ay	-	Pre-miRNA flanking region
chr3@32547775	0.03	chr3	32547715	32547943	hsa-mir-548ay	-	Pre-miRNA	hsa-mir-548ay
chr3@32547777	0.02	chr3	32547715	32547943	hsa-mir-548ay	-	Pre-miRNA	hsa-mir-548ay
chr3@32547778	0.03	chr3	32547715	32547943	hsa-mir-548ay	-	Pre-miRNA	hsa-mir-548ay
chr3@32547784	0.02	chr3	32547715	32547943	hsa-mir-548ay	-	Pre-miRNA	hsa-mir-548ay
chr3@32547790	0.09	chr3	32547715	32547943	hsa-mir-548ay	-	Pre-miRNA	hsa-mir-548ay
chr3@32547800	0.03	chr3	32547715	32547943	hsa-mir-548ay	-	Pre-miRNA	hsa-mir-548ay
chr3@32547801	0.03	chr3	32547715	32547943	hsa-mir-548ay	-	Pre-miRNA	hsa-mir-548ay
chr3@32547803	0.03	chr3	32547715	32547943	hsa-mir-548ay	-	Pre-miRNA	hsa-mir-548ay
chr3@32547807	0.02	chr3	32547715	32547943	hsa-mir-548ay	-	Pre-miRNA	hsa-mir-548ay
chr3@32547822	0.05	chr3	32547715	32547943	hsa-mir-548ay	-	Pre-miRNA	hsa-mir-548ay
chr3@32547838	0.02	chr3	32547715	32547943	hsa-mir-548ay	-	Pre-miRNA	hsa-mir-548ay
chr3@32547839	0.04	chr3	32547715	32547943	hsa-mir-548ay	-	Pre-miRNA	hsa-mir-548ay
chr3@32547840	0.04	chr3	32547715	32547943	hsa-mir-548ay	-	Pre-miRNA	hsa-mir-548ay
chr3@32547843	0.05	chr3	32547715	32547943	hsa-mir-548ay	-	Pre-miRNA	hsa-mir-548ay
chr3@32547857	0.02	chr3	32547715	32547943	hsa-mir-548ay	-	Pre-miRNA	hsa-mir-548ay
chr3@32547860	0.02	chr3	32547715	32547943	hsa-mir-548ay	-	Pre-miRNA	hsa-mir-548ay
chr3@32547865	0.09	chr3	32547715	32547943	hsa-mir-548ay	-	Pre-miRNA	hsa-mir-548ay
chr3@32547868	0.03	chr3	32547715	32547943	hsa-mir-548ay	-	Pre-miRNA	hsa-mir-548ay
chr3@32547908	0.04	chr3	32547715	32547943	hsa-mir-548ay	-	Pre-miRNA flanking region
chr3@32547919	0.02	chr3	32547715	32547943	hsa-mir-548ay	-	Pre-miRNA flanking region
chr3@75263596	0.03	chr3	75263542	75263841	hsa-mir-4444-2	+	Pre-miRNA flanking region
chr4@102251443	0.02	chr4	102251413	102251609	hsa-mir-1255a	-	Pre-miRNA flanking region
chr4@102251466	0.04	chr4	102251413	102251609	hsa-mir-1255a	-	Pre-miRNA	hsa-mir-1255a
chr4@102251472	0.03	chr4	102251413	102251609	hsa-mir-1255a	-	Pre-miRNA	hsa-mir-1255a
chr4@102251487	0.03	chr4	102251413	102251609	hsa-mir-1255a	-	Pre-miRNA	hsa-mir-1255a
chr4@102251493	0.02	chr4	102251413	102251609	hsa-mir-1255a	-	Pre-miRNA	hsa-mir-1255a
chr4@102251514	0.02	chr4	102251413	102251609	hsa-mir-1255a	-	Pre-miRNA	hsa-mir-1255a
chr4@102251523	0.02	chr4	102251413	102251609	hsa-mir-1255a	-	Pre-miRNA	hsa-mir-1255a
chr4@102251547	0.03	chr4	102251413	102251609	hsa-mir-1255a	-	Pre-miRNA	hsa-mir-1255a
chr4@102251549	0.03	chr4	102251413	102251609	hsa-mir-1255a	-	Pre-miRNA	hsa-mir-1255a
chr4@102251550	0.02	chr4	102251413	102251609	hsa-mir-1255a	-	Pre-miRNA	hsa-mir-1255a
chr4@102251560	0.02	chr4	102251413	102251609	hsa-mir-1255a	-	Pre-miRNA	hsa-mir-1255a
chr4@102251575	0.03	chr4	102251413	102251609	hsa-mir-1255a	-	Pre-miRNA flanking region
chr4@102251579	0.03	chr4	102251413	102251609	hsa-mir-1255a	-	Pre-miRNA flanking region
chr4@110409811	0.02	chr4	110409777	110410013	hsa-mir-576	+	Pre-miRNA flanking region
chr4@110409820	0.14	chr4	110409777	110410013	hsa-mir-576	+	Pre-miRNA flanking region
chr4@110409831	0.02	chr4	110409777	110410013	hsa-mir-576	+	Pre-miRNA flanking region
chr4@110409853	0.04	chr4	110409777	110410013	hsa-mir-576	+	Pre-miRNA flanking region
chr4@110409871	0.12	chr4	110409777	110410013	hsa-mir-576	+	Pre-miRNA	hsa-mir-576
chr4@110409876	0.03	chr4	110409777	110410013	hsa-mir-576	+	Pre-miRNA	hsa-mir-576
chr4@110409878	0.03	chr4	110409777	110410013	hsa-mir-576	+	Pre-miRNA	hsa-mir-576
chr4@110409893	0.15	chr4	110409777	110410013	hsa-mir-576	+	Pre-miRNA	hsa-mir-576
chr4@110409931	0.04	chr4	110409777	110410013	hsa-mir-576	+	Pre-miRNA	hsa-mir-576
chr4@110409934	0.03	chr4	110409777	110410013	hsa-mir-576	+	Pre-miRNA	hsa-mir-576
chr4@110409940	0.03	chr4	110409777	110410013	hsa-mir-576	+	Pre-miRNA	hsa-mir-576
chr4@110409971	0.04	chr4	110409777	110410013	hsa-mir-576	+	Pre-miRNA flanking region
chr4@115578017	0.06	chr4	115577856	115578058	hsa-mir-577	+	Pre-miRNA flanking region
chr4@117220934	0.02	chr4	117220801	117221060	hsa-mir-1973	+	Pre-miRNA flanking region
chr4@117220938	0.04	chr4	117220801	117221060	hsa-mir-1973	+	Pre-miRNA flanking region
chr4@148265775	0.04	chr4	148265741	148265942	hsa-mir-548g	-	Pre-miRNA flanking region
chr4@148265797	0.02	chr4	148265741	148265942	hsa-mir-548g	-	Pre-miRNA	hsa-mir-548g
chr4@148265799	0.03	chr4	148265741	148265942	hsa-mir-548g	-	Pre-miRNA	hsa-mir-548g
chr4@148265802	0.05	chr4	148265741	148265942	hsa-mir-548g	-	Pre-miRNA	hsa-mir-548g
chr4@148265806	0.13	chr4	148265741	148265942	hsa-mir-548g	-	Pre-miRNA	hsa-mir-548g
chr4@148265825	0.02	chr4	148265741	148265942	hsa-mir-548g	-	Pre-miRNA	hsa-mir-548g
chr4@148265829	0.03	chr4	148265741	148265942	hsa-mir-548g	-	Pre-miRNA	hsa-mir-548g
chr4@148265830	0.16	chr4	148265741	148265942	hsa-mir-548g	-	Pre-miRNA	hsa-mir-548g
chr4@148265834	0.1	chr4	148265741	148265942	hsa-mir-548g	-	Pre-miRNA	hsa-mir-548g
chr4@148265837	0.65	chr4	148265741	148265942	hsa-mir-548g	-	Pre-miRNA	hsa-mir-548g
chr4@148265858	0.11	chr4	148265741	148265942	hsa-mir-548g	-	Pre-miRNA	hsa-mir-548g
chr4@148265859	0.03	chr4	148265741	148265942	hsa-mir-548g	-	Pre-miRNA	hsa-mir-548g
chr4@148265863	0.1	chr4	148265741	148265942	hsa-mir-548g	-	Pre-miRNA	hsa-mir-548g
chr4@148265909	0.04	chr4	148265741	148265942	hsa-mir-548g	-	Pre-miRNA flanking region
chr4@148265911	0.05	chr4	148265741	148265942	hsa-mir-548g	-	Pre-miRNA flanking region
chr4@185859439	0.03	chr4	185859400	185859700	hsa-mir-4455	-	Pre-miRNA flanking region
chr4@185859445	0.04	chr4	185859400	185859700	hsa-mir-4455	-	Pre-miRNA flanking region
chr4@185859448	0.02	chr4	185859400	185859700	hsa-mir-4455	-	Pre-miRNA flanking region
chr4@185859449	0.51	chr4	185859400	185859700	hsa-mir-4455	-	Pre-miRNA flanking region
chr4@185859464	0.03	chr4	185859400	185859700	hsa-mir-4455	-	Pre-miRNA flanking region
chr4@185859469	0.04	chr4	185859400	185859700	hsa-mir-4455	-	Pre-miRNA flanking region
chr4@185859470	0.04	chr4	185859400	185859700	hsa-mir-4455	-	Pre-miRNA flanking region
chr4@185859478	0.08	chr4	185859400	185859700	hsa-mir-4455	-	Pre-miRNA flanking region
chr4@185859498	0.03	chr4	185859400	185859700	hsa-mir-4455	-	Pre-miRNA flanking region
chr4@185859535	0.1	chr4	185859400	185859700	hsa-mir-4455	-	Pre-miRNA flanking region
chr4@185859572	0.05	chr4	185859400	185859700	hsa-mir-4455	-	Pre-miRNA	hsa-mir-4455
chr4@185859575	0.06	chr4	185859400	185859700	hsa-mir-4455	-	Pre-miRNA	hsa-mir-4455
chr4@185859576	0.06	chr4	185859400	185859700	hsa-mir-4455	-	Pre-miRNA	hsa-mir-4455
chr4@185859579	0.26	chr4	185859400	185859700	hsa-mir-4455	-	Pre-miRNA	hsa-mir-4455
chr4@185859581	0.04	chr4	185859400	185859700	hsa-mir-4455	-	Pre-miRNA	hsa-mir-4455
chr4@185859583	0.04	chr4	185859400	185859700	hsa-mir-4455	-	Pre-miRNA	hsa-mir-4455
chr4@185859585	0.02	chr4	185859400	185859700	hsa-mir-4455	-	Pre-miRNA	hsa-mir-4455
chr4@185859621	0.11	chr4	185859400	185859700	hsa-mir-4455	-	Pre-miRNA flanking region
chr4@185859623	0.18	chr4	185859400	185859700	hsa-mir-4455	-	Pre-miRNA flanking region
chr4@185859638	0.06	chr4	185859400	185859700	hsa-mir-4455	-	Pre-miRNA flanking region
chr4@185859662	0.09	chr4	185859400	185859700	hsa-mir-4455	-	Pre-miRNA flanking region
chr4@185859668	0.02	chr4	185859400	185859700	hsa-mir-4455	-	Pre-miRNA flanking region
chr4@185859675	0.56	chr4	185859400	185859700	hsa-mir-4455	-	Pre-miRNA flanking region
chr4@185859676	0.04	chr4	185859400	185859700	hsa-mir-4455	-	Pre-miRNA flanking region
chr4@36427871	0.05	chr4	36427848	36428123	hsa-mir-1255b-1	-	Pre-miRNA flanking region
chr4@36427882	0.02	chr4	36427848	36428123	hsa-mir-1255b-1	-	Pre-miRNA flanking region
chr4@36427885	0.04	chr4	36427848	36428123	hsa-mir-1255b-1	-	Pre-miRNA flanking region
chr4@36427888	0.06	chr4	36427848	36428123	hsa-mir-1255b-1	-	Pre-miRNA flanking region
chr4@36427905	0.03	chr4	36427848	36428123	hsa-mir-1255b-1	-	Pre-miRNA flanking region
chr4@36427909	0.02	chr4	36427848	36428123	hsa-mir-1255b-1	-	Pre-miRNA flanking region
chr4@36427918	0.06	chr4	36427848	36428123	hsa-mir-1255b-1	-	Pre-miRNA flanking region
chr4@36427919	0.04	chr4	36427848	36428123	hsa-mir-1255b-1	-	Pre-miRNA flanking region
chr4@36427920	0.05	chr4	36427848	36428123	hsa-mir-1255b-1	-	Pre-miRNA flanking region
chr4@36427956	0.06	chr4	36427848	36428123	hsa-mir-1255b-1	-	Pre-miRNA flanking region
chr4@36427962	0.03	chr4	36427848	36428123	hsa-mir-1255b-1	-	Pre-miRNA flanking region
chr4@36427976	0.05	chr4	36427848	36428123	hsa-mir-1255b-1	-	Pre-miRNA flanking region
chr4@36427991	0.02	chr4	36427848	36428123	hsa-mir-1255b-1	-	Pre-miRNA	hsa-mir-1255b-1
chr4@36428002	0.03	chr4	36427848	36428123	hsa-mir-1255b-1	-	Pre-miRNA	hsa-mir-1255b-1
chr4@36428018	0.03	chr4	36427848	36428123	hsa-mir-1255b-1	-	Pre-miRNA	hsa-mir-1255b-1
chr4@36428028	0.06	chr4	36427848	36428123	hsa-mir-1255b-1	-	Pre-miRNA	hsa-mir-1255b-1
chr4@36428044	0.05	chr4	36427848	36428123	hsa-mir-1255b-1	-	Pre-miRNA	hsa-mir-1255b-1
chr4@36428051	0.03	chr4	36427848	36428123	hsa-mir-1255b-1	-	Pre-miRNA flanking region
chr4@36428055	0.38	chr4	36427848	36428123	hsa-mir-1255b-1	-	Pre-miRNA flanking region
chr4@36428072	0.03	chr4	36427848	36428123	hsa-mir-1255b-1	-	Pre-miRNA flanking region
chr4@36428074	0.13	chr4	36427848	36428123	hsa-mir-1255b-1	-	Pre-miRNA flanking region
chr4@36428088	0.02	chr4	36427848	36428123	hsa-mir-1255b-1	-	Pre-miRNA flanking region
chr4@36428093	0.28	chr4	36427848	36428123	hsa-mir-1255b-1	-	Pre-miRNA flanking region
chr4@38869677	0.07	chr4	38869586	38869820	hsa-mir-574	+	Pre-miRNA	hsa-mir-574
chr4@38869683	0.03	chr4	38869586	38869820	hsa-mir-574	+	Pre-miRNA	hsa-mir-574
chr4@38869689	0.02	chr4	38869586	38869820	hsa-mir-574	+	Pre-miRNA	hsa-mir-574
chr4@38869691	0.03	chr4	38869586	38869820	hsa-mir-574	+	Pre-miRNA	hsa-mir-574
chr4@38869695	0.32	chr4	38869586	38869820	hsa-mir-574	+	Pre-miRNA	hsa-mir-574
chr4@38869697	0.08	chr4	38869586	38869820	hsa-mir-574	+	Pre-miRNA	hsa-mir-574
chr4@38869699	0.03	chr4	38869586	38869820	hsa-mir-574	+	Pre-miRNA	hsa-mir-574
chr4@5924972	0.03	chr4	5924949	5925143	hsa-mir-378d-1	-	Pre-miRNA flanking region
chr4@5924976	0.05	chr4	5924949	5925143	hsa-mir-378d-1	-	Pre-miRNA flanking region
chr4@5924978	0.03	chr4	5924949	5925143	hsa-mir-378d-1	-	Pre-miRNA flanking region
chr4@5924988	0.04	chr4	5924949	5925143	hsa-mir-378d-1	-	Pre-miRNA flanking region
chr4@5924995	0.02	chr4	5924949	5925143	hsa-mir-378d-1	-	Pre-miRNA flanking region
chr4@5925001	0.03	chr4	5924949	5925143	hsa-mir-378d-1	-	Pre-miRNA flanking region
chr4@5925012	0.03	chr4	5924949	5925143	hsa-mir-378d-1	-	Pre-miRNA	hsa-mir-378d-1
chr4@5925023	0.02	chr4	5924949	5925143	hsa-mir-378d-1	-	Pre-miRNA	hsa-mir-378d-1
chr4@61788329	0.03	chr4	61788301	61788490	hsa-mir-548ag-1	+	Pre-miRNA flanking region
chr4@61788355	0.07	chr4	61788301	61788490	hsa-mir-548ag-1	+	Pre-miRNA	hsa-mir-548ag-1
chr4@61788362	0.28	chr4	61788301	61788490	hsa-mir-548ag-1	+	Pre-miRNA	hsa-mir-548ag-1
chr4@61788396	0.03	chr4	61788301	61788490	hsa-mir-548ag-1	+	Pre-miRNA	hsa-mir-548ag-1
chr4@61788406	0.02	chr4	61788301	61788490	hsa-mir-548ag-1	+	Pre-miRNA flanking region
chr4@67142501	0.03	chr4	67142474	67142703	hsa-mir-1269a	+	Pre-miRNA flanking region
chr4@67142503	0.03	chr4	67142474	67142703	hsa-mir-1269a	+	Pre-miRNA flanking region
chr4@67142515	0.29	chr4	67142474	67142703	hsa-mir-1269a	+	Pre-miRNA flanking region
chr4@67142516	0.03	chr4	67142474	67142703	hsa-mir-1269a	+	Pre-miRNA flanking region
chr4@67142542	0.16	chr4	67142474	67142703	hsa-mir-1269a	+	Pre-miRNA	hsa-mir-1269a
chr4@67142551	0.21	chr4	67142474	67142703	hsa-mir-1269a	+	Pre-miRNA	hsa-mir-1269a
chr4@67142569	0.03	chr4	67142474	67142703	hsa-mir-1269a	+	Pre-miRNA	hsa-mir-1269a
chr4@67142574	0.04	chr4	67142474	67142703	hsa-mir-1269a	+	Pre-miRNA	hsa-mir-1269a
chr4@67142588	0.19	chr4	67142474	67142703	hsa-mir-1269a	+	Pre-miRNA	hsa-mir-1269a
chr4@67142590	0.02	chr4	67142474	67142703	hsa-mir-1269a	+	Pre-miRNA	hsa-mir-1269a
chr4@67142598	0.02	chr4	67142474	67142703	hsa-mir-1269a	+	Pre-miRNA	hsa-mir-1269a
chr4@67142627	0.03	chr4	67142474	67142703	hsa-mir-1269a	+	Pre-miRNA	hsa-mir-1269a
chr4@67142631	0.46	chr4	67142474	67142703	hsa-mir-1269a	+	Pre-miRNA	hsa-mir-1269a
chr4@67142632	0.04	chr4	67142474	67142703	hsa-mir-1269a	+	Pre-miRNA	hsa-mir-1269a
chr4@67142636	0.32	chr4	67142474	67142703	hsa-mir-1269a	+	Pre-miRNA	hsa-mir-1269a
chr4@77496696	0.03	chr4	77496650	77496938	hsa-mir-548ah	+	Pre-miRNA flanking region
chr4@77496698	0.02	chr4	77496650	77496938	hsa-mir-548ah	+	Pre-miRNA flanking region
chr4@77496702	0.03	chr4	77496650	77496938	hsa-mir-548ah	+	Pre-miRNA flanking region
chr4@77496703	0.04	chr4	77496650	77496938	hsa-mir-548ah	+	Pre-miRNA flanking region
chr4@77496707	0.04	chr4	77496650	77496938	hsa-mir-548ah	+	Pre-miRNA	hsa-mir-548ah
chr4@77496708	0.1	chr4	77496650	77496938	hsa-mir-548ah	+	Pre-miRNA	hsa-mir-548ah
chr4@77496722	0.05	chr4	77496650	77496938	hsa-mir-548ah	+	Pre-miRNA	hsa-mir-548ah
chr4@77496723	0.03	chr4	77496650	77496938	hsa-mir-548ah	+	Pre-miRNA	hsa-mir-548ah
chr4@77496730	0.03	chr4	77496650	77496938	hsa-mir-548ah	+	Pre-miRNA	hsa-mir-548ah
chr4@77496731	0.08	chr4	77496650	77496938	hsa-mir-548ah	+	Pre-miRNA	hsa-mir-548ah
chr4@77496732	0.02	chr4	77496650	77496938	hsa-mir-548ah	+	Pre-miRNA	hsa-mir-548ah
chr4@77496762	0.07	chr4	77496650	77496938	hsa-mir-548ah	+	Pre-miRNA	hsa-mir-548ah
chr4@77496763	0.05	chr4	77496650	77496938	hsa-mir-548ah	+	Pre-miRNA	hsa-mir-548ah
chr4@77496768	0.06	chr4	77496650	77496938	hsa-mir-548ah	+	Pre-miRNA	hsa-mir-548ah
chr4@77496769	0.05	chr4	77496650	77496938	hsa-mir-548ah	+	Pre-miRNA	hsa-mir-548ah
chr4@77496784	0.03	chr4	77496650	77496938	hsa-mir-548ah	+	Pre-miRNA flanking region
chr4@77496804	0.02	chr4	77496650	77496938	hsa-mir-548ah	+	Pre-miRNA flanking region
chr4@77496839	0.02	chr4	77496650	77496938	hsa-mir-548ah	+	Pre-miRNA flanking region
chr4@77496859	0.05	chr4	77496650	77496938	hsa-mir-548ah	+	Pre-miRNA flanking region
chr4@77496895	0.08	chr4	77496650	77496938	hsa-mir-548ah	+	Pre-miRNA flanking region
chr4@77496908	0.1	chr4	77496650	77496938	hsa-mir-548ah	+	Pre-miRNA flanking region
chr4@79742054	0.04	chr4	79741872	79742121	hsa-mir-5096	+	Pre-miRNA flanking region
chr4@79742062	0.02	chr4	79741872	79742121	hsa-mir-5096	+	Pre-miRNA flanking region
chr4@79742082	0.06	chr4	79741872	79742121	hsa-mir-5096	+	Pre-miRNA flanking region
chr4@79742097	0.03	chr4	79741872	79742121	hsa-mir-5096	+	Pre-miRNA flanking region
chr4@8006976	0.12	chr4	8006953	8007212	hsa-mir-95	-	Pre-miRNA flanking region
chr4@8007019	0.03	chr4	8006953	8007212	hsa-mir-95	-	Pre-miRNA flanking region
chr4@8007051	0.05	chr4	8006953	8007212	hsa-mir-95	-	Pre-miRNA	hsa-mir-95
chr4@8007060	0.02	chr4	8006953	8007212	hsa-mir-95	-	Pre-miRNA	hsa-mir-95
chr4@8007064	0.12	chr4	8006953	8007212	hsa-mir-95	-	Pre-miRNA	hsa-mir-95
chr4@8007094	0.04	chr4	8006953	8007212	hsa-mir-95	-	Pre-miRNA	hsa-mir-95
chr4@87463553	0.06	chr4	87463526	87463815	hsa-mir-4452	-	Pre-miRNA flanking region
chr4@87463560	0.04	chr4	87463526	87463815	hsa-mir-4452	-	Pre-miRNA flanking region
chr4@87463565	0.03	chr4	87463526	87463815	hsa-mir-4452	-	Pre-miRNA flanking region
chr4@87463566	0.02	chr4	87463526	87463815	hsa-mir-4452	-	Pre-miRNA flanking region
chr5@100152201	0.05	chr5	100152130	100152371	hsa-mir-548p	-	Pre-miRNA	hsa-mir-548p
chr5@100152202	0.03	chr5	100152130	100152371	hsa-mir-548p	-	Pre-miRNA	hsa-mir-548p
chr5@100152204	0.52	chr5	100152130	100152371	hsa-mir-548p	-	Pre-miRNA	hsa-mir-548p
chr5@100152207	0.04	chr5	100152130	100152371	hsa-mir-548p	-	Pre-miRNA	hsa-mir-548p
chr5@100152208	0.04	chr5	100152130	100152371	hsa-mir-548p	-	Pre-miRNA	hsa-mir-548p
chr5@100152228	0.08	chr5	100152130	100152371	hsa-mir-548p	-	Pre-miRNA	hsa-mir-548p
chr5@100152229	0.03	chr5	100152130	100152371	hsa-mir-548p	-	Pre-miRNA	hsa-mir-548p
chr5@100152236	0.2	chr5	100152130	100152371	hsa-mir-548p	-	Pre-miRNA	hsa-mir-548p
chr5@100152262	0.03	chr5	100152130	100152371	hsa-mir-548p	-	Pre-miRNA	hsa-mir-548p
chr5@100152263	0.05	chr5	100152130	100152371	hsa-mir-548p	-	Pre-miRNA	hsa-mir-548p
chr5@109849478	0.02	chr5	109849438	109849734	hsa-mir-548f-3	-	Pre-miRNA flanking region
chr5@109849483	0.11	chr5	109849438	109849734	hsa-mir-548f-3	-	Pre-miRNA flanking region
chr5@109849503	0.03	chr5	109849438	109849734	hsa-mir-548f-3	-	Pre-miRNA flanking region
chr5@109849507	0.02	chr5	109849438	109849734	hsa-mir-548f-3	-	Pre-miRNA flanking region
chr5@109849508	0.02	chr5	109849438	109849734	hsa-mir-548f-3	-	Pre-miRNA flanking region
chr5@109849514	0.06	chr5	109849438	109849734	hsa-mir-548f-3	-	Pre-miRNA flanking region
chr5@109849535	0.37	chr5	109849438	109849734	hsa-mir-548f-3	-	Pre-miRNA	hsa-mir-548f-3
chr5@109849545	0.03	chr5	109849438	109849734	hsa-mir-548f-3	-	Pre-miRNA	hsa-mir-548f-3
chr5@109849555	0.04	chr5	109849438	109849734	hsa-mir-548f-3	-	Pre-miRNA	hsa-mir-548f-3
chr5@109849609	0.04	chr5	109849438	109849734	hsa-mir-548f-3	-	Pre-miRNA	hsa-mir-548f-3
chr5@109849636	0.04	chr5	109849438	109849734	hsa-mir-548f-3	-	Pre-miRNA flanking region
chr5@109849641	0.03	chr5	109849438	109849734	hsa-mir-548f-3	-	Pre-miRNA flanking region
chr5@109849657	0.03	chr5	109849438	109849734	hsa-mir-548f-3	-	Pre-miRNA flanking region
chr5@109849659	0.02	chr5	109849438	109849734	hsa-mir-548f-3	-	Pre-miRNA flanking region
chr5@148441893	0.02	chr5	148441806	148442031	hsa-mir-584	-	Pre-miRNA	hsa-mir-584
chr5@148441897	0.04	chr5	148441806	148442031	hsa-mir-584	-	Pre-miRNA	hsa-mir-584
chr5@148441918	0.03	chr5	148441806	148442031	hsa-mir-584	-	Pre-miRNA	hsa-mir-584
chr5@148441930	0.07	chr5	148441806	148442031	hsa-mir-584	-	Pre-miRNA	hsa-mir-584
chr5@148441939	0.02	chr5	148441806	148442031	hsa-mir-584	-	Pre-miRNA	hsa-mir-584
chr5@148441951	0.03	chr5	148441806	148442031	hsa-mir-584	-	Pre-miRNA	hsa-mir-584
chr5@148441967	0.02	chr5	148441806	148442031	hsa-mir-584	-	Pre-miRNA	hsa-mir-584
chr5@149112349	0.02	chr5	149112322	149112528	hsa-mir-378a	+	Pre-miRNA flanking region
chr5@149112361	0.02	chr5	149112322	149112528	hsa-mir-378a	+	Pre-miRNA flanking region
chr5@149112374	0.03	chr5	149112322	149112528	hsa-mir-378a	+	Pre-miRNA flanking region
chr5@149112396	0.04	chr5	149112322	149112528	hsa-mir-378a	+	Pre-miRNA	hsa-mir-378a
chr5@149112462	0.03	chr5	149112322	149112528	hsa-mir-378a	+	Pre-miRNA flanking region
chr5@149112468	0.03	chr5	149112322	149112528	hsa-mir-378a	+	Pre-miRNA flanking region
chr5@149112475	0.03	chr5	149112322	149112528	hsa-mir-378a	+	Pre-miRNA flanking region
chr5@149112477	0.07	chr5	149112322	149112528	hsa-mir-378a	+	Pre-miRNA flanking region
chr5@153726650	0.13	chr5	153726598	153726832	hsa-mir-1294	+	Pre-miRNA flanking region
chr5@153726658	0.09	chr5	153726598	153726832	hsa-mir-1294	+	Pre-miRNA flanking region
chr5@153726659	0.03	chr5	153726598	153726832	hsa-mir-1294	+	Pre-miRNA flanking region
chr5@153726662	0.03	chr5	153726598	153726832	hsa-mir-1294	+	Pre-miRNA flanking region
chr5@153726670	0.03	chr5	153726598	153726832	hsa-mir-1294	+	Pre-miRNA	hsa-mir-1294
chr5@153726673	0.02	chr5	153726598	153726832	hsa-mir-1294	+	Pre-miRNA	hsa-mir-1294
chr5@153726677	0.04	chr5	153726598	153726832	hsa-mir-1294	+	Pre-miRNA	hsa-mir-1294
chr5@153726689	0.26	chr5	153726598	153726832	hsa-mir-1294	+	Pre-miRNA	hsa-mir-1294
chr5@153726690	0.03	chr5	153726598	153726832	hsa-mir-1294	+	Pre-miRNA	hsa-mir-1294
chr5@153726697	0.02	chr5	153726598	153726832	hsa-mir-1294	+	Pre-miRNA	hsa-mir-1294
chr5@153726700	0.02	chr5	153726598	153726832	hsa-mir-1294	+	Pre-miRNA	hsa-mir-1294
chr5@153726702	0.03	chr5	153726598	153726832	hsa-mir-1294	+	Pre-miRNA	hsa-mir-1294
chr5@153726710	0.03	chr5	153726598	153726832	hsa-mir-1294	+	Pre-miRNA	hsa-mir-1294
chr5@153726713	0.07	chr5	153726598	153726832	hsa-mir-1294	+	Pre-miRNA	hsa-mir-1294
chr5@153726715	0.02	chr5	153726598	153726832	hsa-mir-1294	+	Pre-miRNA	hsa-mir-1294
chr5@153726720	0.03	chr5	153726598	153726832	hsa-mir-1294	+	Pre-miRNA	hsa-mir-1294
chr5@153726721	0.08	chr5	153726598	153726832	hsa-mir-1294	+	Pre-miRNA	hsa-mir-1294
chr5@153726726	0.15	chr5	153726598	153726832	hsa-mir-1294	+	Pre-miRNA	hsa-mir-1294
chr5@153726727	0.21	chr5	153726598	153726832	hsa-mir-1294	+	Pre-miRNA	hsa-mir-1294
chr5@153726729	0.23	chr5	153726598	153726832	hsa-mir-1294	+	Pre-miRNA	hsa-mir-1294
chr5@153726730	0.02	chr5	153726598	153726832	hsa-mir-1294	+	Pre-miRNA	hsa-mir-1294
chr5@154209049	0.03	chr5	154208960	154209172	hsa-mir-378h	+	Pre-miRNA	hsa-mir-378h
chr5@154209062	0.1	chr5	154208960	154209172	hsa-mir-378h	+	Pre-miRNA	hsa-mir-378h
chr5@154209078	0.04	chr5	154208960	154209172	hsa-mir-378h	+	Pre-miRNA	hsa-mir-378h
chr5@154209139	0.03	chr5	154208960	154209172	hsa-mir-378h	+	Pre-miRNA flanking region
chr5@167988022	0.03	chr5	167987856	167988050	hsa-mir-103a-1	-	Pre-miRNA flanking region
chr5@168690572	0.02	chr5	168690539	168690763	hsa-mir-585	-	Pre-miRNA flanking region
chr5@168690584	0.08	chr5	168690539	168690763	hsa-mir-585	-	Pre-miRNA flanking region
chr5@168690604	0.03	chr5	168690539	168690763	hsa-mir-585	-	Pre-miRNA flanking region
chr5@168690621	0.03	chr5	168690539	168690763	hsa-mir-585	-	Pre-miRNA	hsa-mir-585
chr5@168690626	0.03	chr5	168690539	168690763	hsa-mir-585	-	Pre-miRNA	hsa-mir-585
chr5@168690632	0.04	chr5	168690539	168690763	hsa-mir-585	-	Pre-miRNA	hsa-mir-585
chr5@169455399	0.02	chr5	169455373	169455637	hsa-mir-378e	+	Pre-miRNA flanking region
chr5@169455430	0.02	chr5	169455373	169455637	hsa-mir-378e	+	Pre-miRNA flanking region
chr5@169455456	0.02	chr5	169455373	169455637	hsa-mir-378e	+	Pre-miRNA flanking region
chr5@169455483	0.02	chr5	169455373	169455637	hsa-mir-378e	+	Pre-miRNA flanking region
chr5@169455551	0.03	chr5	169455373	169455637	hsa-mir-378e	+	Pre-miRNA	hsa-mir-378e
chr5@169455562	0.16	chr5	169455373	169455637	hsa-mir-378e	+	Pre-miRNA	hsa-mir-378e
chr5@169455583	0.03	chr5	169455373	169455637	hsa-mir-378e	+	Pre-miRNA flanking region
chr5@175794881	0.11	chr5	175794860	175795111	hsa-mir-1271	+	Pre-miRNA flanking region
chr5@175794882	0.03	chr5	175794860	175795111	hsa-mir-1271	+	Pre-miRNA flanking region
chr5@175794901	0.05	chr5	175794860	175795111	hsa-mir-1271	+	Pre-miRNA flanking region
chr5@175794908	0.04	chr5	175794860	175795111	hsa-mir-1271	+	Pre-miRNA flanking region
chr5@175794919	0.16	chr5	175794860	175795111	hsa-mir-1271	+	Pre-miRNA flanking region
chr5@175794922	0.02	chr5	175794860	175795111	hsa-mir-1271	+	Pre-miRNA flanking region
chr5@175794923	0.05	chr5	175794860	175795111	hsa-mir-1271	+	Pre-miRNA flanking region
chr5@175794927	0.03	chr5	175794860	175795111	hsa-mir-1271	+	Pre-miRNA flanking region
chr5@175794928	0.04	chr5	175794860	175795111	hsa-mir-1271	+	Pre-miRNA flanking region
chr5@175794938	0.03	chr5	175794860	175795111	hsa-mir-1271	+	Pre-miRNA flanking region
chr5@175794942	0.03	chr5	175794860	175795111	hsa-mir-1271	+	Pre-miRNA flanking region
chr5@175794944	0.02	chr5	175794860	175795111	hsa-mir-1271	+	Pre-miRNA flanking region
chr5@175794964	0.05	chr5	175794860	175795111	hsa-mir-1271	+	Pre-miRNA	hsa-mir-1271
chr5@175795005	0.03	chr5	175794860	175795111	hsa-mir-1271	+	Pre-miRNA	hsa-mir-1271
chr5@175795008	0.05	chr5	175794860	175795111	hsa-mir-1271	+	Pre-miRNA	hsa-mir-1271
chr5@175795021	0.25	chr5	175794860	175795111	hsa-mir-1271	+	Pre-miRNA	hsa-mir-1271
chr5@175795022	0.02	chr5	175794860	175795111	hsa-mir-1271	+	Pre-miRNA	hsa-mir-1271
chr5@175795024	0.02	chr5	175794860	175795111	hsa-mir-1271	+	Pre-miRNA	hsa-mir-1271
chr5@175795027	0.04	chr5	175794860	175795111	hsa-mir-1271	+	Pre-miRNA	hsa-mir-1271
chr5@175795036	0.09	chr5	175794860	175795111	hsa-mir-1271	+	Pre-miRNA flanking region
chr5@175795060	0.04	chr5	175794860	175795111	hsa-mir-1271	+	Pre-miRNA flanking region
chr5@175795062	0.07	chr5	175794860	175795111	hsa-mir-1271	+	Pre-miRNA flanking region
chr5@175795068	0.02	chr5	175794860	175795111	hsa-mir-1271	+	Pre-miRNA flanking region
chr5@175795075	0.04	chr5	175794860	175795111	hsa-mir-1271	+	Pre-miRNA flanking region
chr5@179442359	0.03	chr5	179442275	179442454	hsa-mir-340	-	Pre-miRNA	hsa-mir-340
chr5@179442385	0.04	chr5	179442275	179442454	hsa-mir-340	-	Pre-miRNA	hsa-mir-340
chr5@32394460	0.02	chr5	32394431	32394644	hsa-mir-579	-	Pre-miRNA flanking region
chr5@32394467	0.03	chr5	32394431	32394644	hsa-mir-579	-	Pre-miRNA flanking region
chr5@32394470	0.03	chr5	32394431	32394644	hsa-mir-579	-	Pre-miRNA flanking region
chr5@32394479	0.03	chr5	32394431	32394644	hsa-mir-579	-	Pre-miRNA flanking region
chr5@32394488	0.14	chr5	32394431	32394644	hsa-mir-579	-	Pre-miRNA	hsa-mir-579
chr5@32394495	0.07	chr5	32394431	32394644	hsa-mir-579	-	Pre-miRNA	hsa-mir-579
chr5@32394496	0.02	chr5	32394431	32394644	hsa-mir-579	-	Pre-miRNA	hsa-mir-579
chr5@32394528	0.04	chr5	32394431	32394644	hsa-mir-579	-	Pre-miRNA	hsa-mir-579
chr5@32394540	0.04	chr5	32394431	32394644	hsa-mir-579	-	Pre-miRNA	hsa-mir-579
chr5@32394547	0.02	chr5	32394431	32394644	hsa-mir-579	-	Pre-miRNA	hsa-mir-579
chr5@32394550	0.04	chr5	32394431	32394644	hsa-mir-579	-	Pre-miRNA	hsa-mir-579
chr5@32394551	0.02	chr5	32394431	32394644	hsa-mir-579	-	Pre-miRNA	hsa-mir-579
chr5@32394571	0.1	chr5	32394431	32394644	hsa-mir-579	-	Pre-miRNA	hsa-mir-579
chr5@32394577	0.02	chr5	32394431	32394644	hsa-mir-579	-	Pre-miRNA	hsa-mir-579
chr5@32394579	0.04	chr5	32394431	32394644	hsa-mir-579	-	Pre-miRNA	hsa-mir-579
chr5@32394593	0.1	chr5	32394431	32394644	hsa-mir-579	-	Pre-miRNA flanking region
chr5@32394596	0.02	chr5	32394431	32394644	hsa-mir-579	-	Pre-miRNA flanking region
chr5@32394604	0.11	chr5	32394431	32394644	hsa-mir-579	-	Pre-miRNA flanking region
chr5@32394607	0.05	chr5	32394431	32394644	hsa-mir-579	-	Pre-miRNA flanking region
chr5@32394613	0.03	chr5	32394431	32394644	hsa-mir-579	-	Pre-miRNA flanking region
chr5@32394614	0.09	chr5	32394431	32394644	hsa-mir-579	-	Pre-miRNA flanking region
chr5@32394615	0.07	chr5	32394431	32394644	hsa-mir-579	-	Pre-miRNA flanking region
chr5@57825865	0.44	chr5	57825793	57825987	hsa-mir-548ae-2	-	Pre-miRNA flanking region
chr5@57825876	0.08	chr5	57825793	57825987	hsa-mir-548ae-2	-	Pre-miRNA	hsa-mir-548ae-2
chr5@57825878	0.75	chr5	57825793	57825987	hsa-mir-548ae-2	-	Pre-miRNA	hsa-mir-548ae-2
chr5@57825881	0.69	chr5	57825793	57825987	hsa-mir-548ae-2	-	Pre-miRNA	hsa-mir-548ae-2
chr5@57825897	0.15	chr5	57825793	57825987	hsa-mir-548ae-2	-	Pre-miRNA	hsa-mir-548ae-2
chr5@57825900	0.05	chr5	57825793	57825987	hsa-mir-548ae-2	-	Pre-miRNA	hsa-mir-548ae-2
chr5@57825911	0.07	chr5	57825793	57825987	hsa-mir-548ae-2	-	Pre-miRNA	hsa-mir-548ae-2
chr5@57825913	0.03	chr5	57825793	57825987	hsa-mir-548ae-2	-	Pre-miRNA	hsa-mir-548ae-2
chr5@57825915	0.7	chr5	57825793	57825987	hsa-mir-548ae-2	-	Pre-miRNA	hsa-mir-548ae-2
chr5@57825916	0.75	chr5	57825793	57825987	hsa-mir-548ae-2	-	Pre-miRNA	hsa-mir-548ae-2
chr5@57825917	0.46	chr5	57825793	57825987	hsa-mir-548ae-2	-	Pre-miRNA	hsa-mir-548ae-2
chr5@57825922	0.08	chr5	57825793	57825987	hsa-mir-548ae-2	-	Pre-miRNA	hsa-mir-548ae-2
chr5@57825934	0.05	chr5	57825793	57825987	hsa-mir-548ae-2	-	Pre-miRNA	hsa-mir-548ae-2
chr5@57825936	0.05	chr5	57825793	57825987	hsa-mir-548ae-2	-	Pre-miRNA	hsa-mir-548ae-2
chr5@57825937	0.04	chr5	57825793	57825987	hsa-mir-548ae-2	-	Pre-miRNA flanking region
chr5@57825938	0.07	chr5	57825793	57825987	hsa-mir-548ae-2	-	Pre-miRNA flanking region
chr5@58999448	0.04	chr5	58999409	58999602	hsa-mir-582	-	Pre-miRNA	hsa-mir-582
chr5@58999461	0.04	chr5	58999409	58999602	hsa-mir-582	-	Pre-miRNA	hsa-mir-582
chr5@58999477	0.05	chr5	58999409	58999602	hsa-mir-582	-	Pre-miRNA	hsa-mir-582
chr5@58999495	0.03	chr5	58999409	58999602	hsa-mir-582	-	Pre-miRNA	hsa-mir-582
chr5@58999504	0.06	chr5	58999409	58999602	hsa-mir-582	-	Pre-miRNA	hsa-mir-582
chr5@58999505	0.06	chr5	58999409	58999602	hsa-mir-582	-	Pre-miRNA	hsa-mir-582
chr5@58999514	0.04	chr5	58999409	58999602	hsa-mir-582	-	Pre-miRNA	hsa-mir-582
chr5@58999517	0.05	chr5	58999409	58999602	hsa-mir-582	-	Pre-miRNA	hsa-mir-582
chr5@58999518	0.04	chr5	58999409	58999602	hsa-mir-582	-	Pre-miRNA	hsa-mir-582
chr5@58999519	0.03	chr5	58999409	58999602	hsa-mir-582	-	Pre-miRNA	hsa-mir-582
chr5@58999521	0.04	chr5	58999409	58999602	hsa-mir-582	-	Pre-miRNA	hsa-mir-582
chr5@58999526	0.05	chr5	58999409	58999602	hsa-mir-582	-	Pre-miRNA	hsa-mir-582
chr5@58999551	0.03	chr5	58999409	58999602	hsa-mir-582	-	Pre-miRNA flanking region
chr5@58999555	0.03	chr5	58999409	58999602	hsa-mir-582	-	Pre-miRNA flanking region
chr5@58999557	0.08	chr5	58999409	58999602	hsa-mir-582	-	Pre-miRNA flanking region
chr5@58999564	0.05	chr5	58999409	58999602	hsa-mir-582	-	Pre-miRNA flanking region
chr5@58999574	0.03	chr5	58999409	58999602	hsa-mir-582	-	Pre-miRNA flanking region
chr5@58999577	0.02	chr5	58999409	58999602	hsa-mir-582	-	Pre-miRNA flanking region
chr6@119390219	0.37	chr6	119390174	119390384	hsa-mir-548b	-	Pre-miRNA	hsa-mir-548b
chr6@119390227	0.25	chr6	119390174	119390384	hsa-mir-548b	-	Pre-miRNA	hsa-mir-548b
chr6@119390232	0.03	chr6	119390174	119390384	hsa-mir-548b	-	Pre-miRNA	hsa-mir-548b
chr6@119390236	0.04	chr6	119390174	119390384	hsa-mir-548b	-	Pre-miRNA	hsa-mir-548b
chr6@119390240	0.1	chr6	119390174	119390384	hsa-mir-548b	-	Pre-miRNA	hsa-mir-548b
chr6@119390251	0.03	chr6	119390174	119390384	hsa-mir-548b	-	Pre-miRNA	hsa-mir-548b
chr6@119390257	0.03	chr6	119390174	119390384	hsa-mir-548b	-	Pre-miRNA	hsa-mir-548b
chr6@119390258	0.02	chr6	119390174	119390384	hsa-mir-548b	-	Pre-miRNA	hsa-mir-548b
chr6@119390261	0.02	chr6	119390174	119390384	hsa-mir-548b	-	Pre-miRNA	hsa-mir-548b
chr6@119390262	0.13	chr6	119390174	119390384	hsa-mir-548b	-	Pre-miRNA	hsa-mir-548b
chr6@119390267	0.07	chr6	119390174	119390384	hsa-mir-548b	-	Pre-miRNA	hsa-mir-548b
chr6@119390268	0.42	chr6	119390174	119390384	hsa-mir-548b	-	Pre-miRNA	hsa-mir-548b
chr6@119390269	0.13	chr6	119390174	119390384	hsa-mir-548b	-	Pre-miRNA	hsa-mir-548b
chr6@119390270	0.12	chr6	119390174	119390384	hsa-mir-548b	-	Pre-miRNA	hsa-mir-548b
chr6@119390275	0.09	chr6	119390174	119390384	hsa-mir-548b	-	Pre-miRNA	hsa-mir-548b
chr6@119390276	0.63	chr6	119390174	119390384	hsa-mir-548b	-	Pre-miRNA	hsa-mir-548b
chr6@119390279	0.08	chr6	119390174	119390384	hsa-mir-548b	-	Pre-miRNA	hsa-mir-548b
chr6@119390290	0.03	chr6	119390174	119390384	hsa-mir-548b	-	Pre-miRNA	hsa-mir-548b
chr6@119390291	0.03	chr6	119390174	119390384	hsa-mir-548b	-	Pre-miRNA	hsa-mir-548b
chr6@119390295	0.04	chr6	119390174	119390384	hsa-mir-548b	-	Pre-miRNA	hsa-mir-548b
chr6@119390315	0.02	chr6	119390174	119390384	hsa-mir-548b	-	Pre-miRNA flanking region
chr6@119390321	0.07	chr6	119390174	119390384	hsa-mir-548b	-	Pre-miRNA flanking region
chr6@119390332	0.03	chr6	119390174	119390384	hsa-mir-548b	-	Pre-miRNA flanking region
chr6@119390336	0.03	chr6	119390174	119390384	hsa-mir-548b	-	Pre-miRNA flanking region
chr6@119390340	0.12	chr6	119390174	119390384	hsa-mir-548b	-	Pre-miRNA flanking region
chr6@120336280	0.02	chr6	120336255	120336538	hsa-mir-3144	+	Pre-miRNA flanking region
chr6@120336284	0.03	chr6	120336255	120336538	hsa-mir-3144	+	Pre-miRNA flanking region
chr6@120336286	0.03	chr6	120336255	120336538	hsa-mir-3144	+	Pre-miRNA flanking region
chr6@120336302	0.05	chr6	120336255	120336538	hsa-mir-3144	+	Pre-miRNA flanking region
chr6@120336304	0.04	chr6	120336255	120336538	hsa-mir-3144	+	Pre-miRNA flanking region
chr6@120336316	0.03	chr6	120336255	120336538	hsa-mir-3144	+	Pre-miRNA flanking region
chr6@120336322	0.02	chr6	120336255	120336538	hsa-mir-3144	+	Pre-miRNA flanking region
chr6@120336328	0.07	chr6	120336255	120336538	hsa-mir-3144	+	Pre-miRNA	hsa-mir-3144
chr6@120336333	0.55	chr6	120336255	120336538	hsa-mir-3144	+	Pre-miRNA	hsa-mir-3144
chr6@120336371	0.05	chr6	120336255	120336538	hsa-mir-3144	+	Pre-miRNA	hsa-mir-3144
chr6@120336373	0.04	chr6	120336255	120336538	hsa-mir-3144	+	Pre-miRNA	hsa-mir-3144
chr6@120336375	0.12	chr6	120336255	120336538	hsa-mir-3144	+	Pre-miRNA	hsa-mir-3144
chr6@120336381	0.08	chr6	120336255	120336538	hsa-mir-3144	+	Pre-miRNA	hsa-mir-3144
chr6@120336382	0.04	chr6	120336255	120336538	hsa-mir-3144	+	Pre-miRNA	hsa-mir-3144
chr6@120336386	0.07	chr6	120336255	120336538	hsa-mir-3144	+	Pre-miRNA	hsa-mir-3144
chr6@120336388	0.02	chr6	120336255	120336538	hsa-mir-3144	+	Pre-miRNA	hsa-mir-3144
chr6@120336391	0.09	chr6	120336255	120336538	hsa-mir-3144	+	Pre-miRNA	hsa-mir-3144
chr6@120336402	0.06	chr6	120336255	120336538	hsa-mir-3144	+	Pre-miRNA	hsa-mir-3144
chr6@120336403	0.11	chr6	120336255	120336538	hsa-mir-3144	+	Pre-miRNA	hsa-mir-3144
chr6@120336408	0.03	chr6	120336255	120336538	hsa-mir-3144	+	Pre-miRNA flanking region
chr6@120336416	0.1	chr6	120336255	120336538	hsa-mir-3144	+	Pre-miRNA flanking region
chr6@120336431	0.02	chr6	120336255	120336538	hsa-mir-3144	+	Pre-miRNA flanking region
chr6@120336433	0.06	chr6	120336255	120336538	hsa-mir-3144	+	Pre-miRNA flanking region
chr6@120336445	0.03	chr6	120336255	120336538	hsa-mir-3144	+	Pre-miRNA flanking region
chr6@120336449	0.02	chr6	120336255	120336538	hsa-mir-3144	+	Pre-miRNA flanking region
chr6@120336453	0.02	chr6	120336255	120336538	hsa-mir-3144	+	Pre-miRNA flanking region
chr6@120336469	0.04	chr6	120336255	120336538	hsa-mir-3144	+	Pre-miRNA flanking region
chr6@120336474	0.03	chr6	120336255	120336538	hsa-mir-3144	+	Pre-miRNA flanking region
chr6@120336490	0.04	chr6	120336255	120336538	hsa-mir-3144	+	Pre-miRNA flanking region
chr6@120336494	0.03	chr6	120336255	120336538	hsa-mir-3144	+	Pre-miRNA flanking region
chr6@120336499	0.05	chr6	120336255	120336538	hsa-mir-3144	+	Pre-miRNA flanking region
chr6@132113319	0.33	chr6	132113222	132113490	hsa-mir-548h-5	+	Pre-miRNA	hsa-mir-548h-5
chr6@132113328	0.05	chr6	132113222	132113490	hsa-mir-548h-5	+	Pre-miRNA	hsa-mir-548h-5
chr6@132113329	0.12	chr6	132113222	132113490	hsa-mir-548h-5	+	Pre-miRNA	hsa-mir-548h-5
chr6@132113330	0.02	chr6	132113222	132113490	hsa-mir-548h-5	+	Pre-miRNA	hsa-mir-548h-5
chr6@132113334	0.02	chr6	132113222	132113490	hsa-mir-548h-5	+	Pre-miRNA	hsa-mir-548h-5
chr6@132113338	0.05	chr6	132113222	132113490	hsa-mir-548h-5	+	Pre-miRNA	hsa-mir-548h-5
chr6@132113341	0.04	chr6	132113222	132113490	hsa-mir-548h-5	+	Pre-miRNA	hsa-mir-548h-5
chr6@132113348	0.06	chr6	132113222	132113490	hsa-mir-548h-5	+	Pre-miRNA	hsa-mir-548h-5
chr6@132113363	0.02	chr6	132113222	132113490	hsa-mir-548h-5	+	Pre-miRNA	hsa-mir-548h-5
chr6@132113366	0.02	chr6	132113222	132113490	hsa-mir-548h-5	+	Pre-miRNA	hsa-mir-548h-5
chr6@132113379	0.61	chr6	132113222	132113490	hsa-mir-548h-5	+	Pre-miRNA flanking region
chr6@132436330	0.74	chr6	132436193	132436477	hsa-mir-548aj-1	-	Pre-miRNA flanking region
chr6@132436340	0.21	chr6	132436193	132436477	hsa-mir-548aj-1	-	Pre-miRNA	hsa-mir-548aj-1
chr6@132436341	0.29	chr6	132436193	132436477	hsa-mir-548aj-1	-	Pre-miRNA	hsa-mir-548aj-1
chr6@132436342	0.1	chr6	132436193	132436477	hsa-mir-548aj-1	-	Pre-miRNA	hsa-mir-548aj-1
chr6@132436343	0.71	chr6	132436193	132436477	hsa-mir-548aj-1	-	Pre-miRNA	hsa-mir-548aj-1
chr6@132436346	0.42	chr6	132436193	132436477	hsa-mir-548aj-1	-	Pre-miRNA	hsa-mir-548aj-1
chr6@132436347	0.14	chr6	132436193	132436477	hsa-mir-548aj-1	-	Pre-miRNA	hsa-mir-548aj-1
chr6@132436377	0.04	chr6	132436193	132436477	hsa-mir-548aj-1	-	Pre-miRNA	hsa-mir-548aj-1
chr6@132436379	0.31	chr6	132436193	132436477	hsa-mir-548aj-1	-	Pre-miRNA	hsa-mir-548aj-1
chr6@132436380	0.25	chr6	132436193	132436477	hsa-mir-548aj-1	-	Pre-miRNA	hsa-mir-548aj-1
chr6@132436387	0.73	chr6	132436193	132436477	hsa-mir-548aj-1	-	Pre-miRNA	hsa-mir-548aj-1
chr6@132436390	0.86	chr6	132436193	132436477	hsa-mir-548aj-1	-	Pre-miRNA	hsa-mir-548aj-1
chr6@132436396	0.13	chr6	132436193	132436477	hsa-mir-548aj-1	-	Pre-miRNA	hsa-mir-548aj-1
chr6@132436398	0.12	chr6	132436193	132436477	hsa-mir-548aj-1	-	Pre-miRNA	hsa-mir-548aj-1
chr6@132436401	0.08	chr6	132436193	132436477	hsa-mir-548aj-1	-	Pre-miRNA	hsa-mir-548aj-1
chr6@132436406	0.2	chr6	132436193	132436477	hsa-mir-548aj-1	-	Pre-miRNA flanking region
chr6@132436407	0.05	chr6	132436193	132436477	hsa-mir-548aj-1	-	Pre-miRNA flanking region
chr6@135560286	0.06	chr6	135560262	135560430	hsa-mir-548a-2	+	Pre-miRNA flanking region
chr6@135560298	0.2	chr6	135560262	135560430	hsa-mir-548a-2	+	Pre-miRNA	hsa-mir-548a-2
chr6@135560300	0.04	chr6	135560262	135560430	hsa-mir-548a-2	+	Pre-miRNA	hsa-mir-548a-2
chr6@135560305	0.04	chr6	135560262	135560430	hsa-mir-548a-2	+	Pre-miRNA	hsa-mir-548a-2
chr6@135560307	0.05	chr6	135560262	135560430	hsa-mir-548a-2	+	Pre-miRNA	hsa-mir-548a-2
chr6@135560314	0.09	chr6	135560262	135560430	hsa-mir-548a-2	+	Pre-miRNA	hsa-mir-548a-2
chr6@135560318	0.07	chr6	135560262	135560430	hsa-mir-548a-2	+	Pre-miRNA	hsa-mir-548a-2
chr6@135560326	0.16	chr6	135560262	135560430	hsa-mir-548a-2	+	Pre-miRNA	hsa-mir-548a-2
chr6@135560330	0.05	chr6	135560262	135560430	hsa-mir-548a-2	+	Pre-miRNA	hsa-mir-548a-2
chr6@135560336	0.1	chr6	135560262	135560430	hsa-mir-548a-2	+	Pre-miRNA	hsa-mir-548a-2
chr6@135560338	0.48	chr6	135560262	135560430	hsa-mir-548a-2	+	Pre-miRNA	hsa-mir-548a-2
chr6@135560340	0.04	chr6	135560262	135560430	hsa-mir-548a-2	+	Pre-miRNA	hsa-mir-548a-2
chr6@135560352	0.02	chr6	135560262	135560430	hsa-mir-548a-2	+	Pre-miRNA	hsa-mir-548a-2
chr6@135560364	0.06	chr6	135560262	135560430	hsa-mir-548a-2	+	Pre-miRNA	hsa-mir-548a-2
chr6@135560374	0.1	chr6	135560262	135560430	hsa-mir-548a-2	+	Pre-miRNA	hsa-mir-548a-2
chr6@135560376	0.03	chr6	135560262	135560430	hsa-mir-548a-2	+	Pre-miRNA	hsa-mir-548a-2
chr6@135560377	0.04	chr6	135560262	135560430	hsa-mir-548a-2	+	Pre-miRNA	hsa-mir-548a-2
chr6@135560387	0.14	chr6	135560262	135560430	hsa-mir-548a-2	+	Pre-miRNA	hsa-mir-548a-2
chr6@135560392	0.02	chr6	135560262	135560430	hsa-mir-548a-2	+	Pre-miRNA	hsa-mir-548a-2
chr6@18572027	0.02	chr6	18571941	18572175	hsa-mir-548a-1	+	Pre-miRNA	hsa-mir-548a-1
chr6@18572033	0.04	chr6	18571941	18572175	hsa-mir-548a-1	+	Pre-miRNA	hsa-mir-548a-1
chr6@18572036	0.02	chr6	18571941	18572175	hsa-mir-548a-1	+	Pre-miRNA	hsa-mir-548a-1
chr6@18572044	0.06	chr6	18571941	18572175	hsa-mir-548a-1	+	Pre-miRNA	hsa-mir-548a-1
chr6@18572048	0.02	chr6	18571941	18572175	hsa-mir-548a-1	+	Pre-miRNA	hsa-mir-548a-1
chr6@18572050	0.02	chr6	18571941	18572175	hsa-mir-548a-1	+	Pre-miRNA	hsa-mir-548a-1
chr6@18572054	0.16	chr6	18571941	18572175	hsa-mir-548a-1	+	Pre-miRNA	hsa-mir-548a-1
chr6@18572062	0.02	chr6	18571941	18572175	hsa-mir-548a-1	+	Pre-miRNA	hsa-mir-548a-1
chr6@18572081	0.03	chr6	18571941	18572175	hsa-mir-548a-1	+	Pre-miRNA	hsa-mir-548a-1
chr6@18572087	0.03	chr6	18571941	18572175	hsa-mir-548a-1	+	Pre-miRNA	hsa-mir-548a-1
chr6@18572094	0.5	chr6	18571941	18572175	hsa-mir-548a-1	+	Pre-miRNA	hsa-mir-548a-1
chr6@32717780	0.03	chr6	32717626	32717863	hsa-mir-3135b	-	Pre-miRNA flanking region
chr6@32717781	0.04	chr6	32717626	32717863	hsa-mir-3135b	-	Pre-miRNA flanking region
chr6@32717784	0.03	chr6	32717626	32717863	hsa-mir-3135b	-	Pre-miRNA flanking region
chr6@32717790	0.03	chr6	32717626	32717863	hsa-mir-3135b	-	Pre-miRNA flanking region
chr6@32717797	0.03	chr6	32717626	32717863	hsa-mir-3135b	-	Pre-miRNA flanking region
chr6@33665919	0.03	chr6	33665870	33666056	hsa-mir-3934	+	Pre-miRNA	hsa-mir-3934
chr6@91022564	0.02	chr6	91022330	91022618	hsa-mir-4464	+	Pre-miRNA flanking region
chr6@91022568	0.02	chr6	91022330	91022618	hsa-mir-4464	+	Pre-miRNA flanking region
chr6@91022572	0.03	chr6	91022330	91022618	hsa-mir-4464	+	Pre-miRNA flanking region
chr6@91022574	0.07	chr6	91022330	91022618	hsa-mir-4464	+	Pre-miRNA flanking region
chr6@91022576	0.02	chr6	91022330	91022618	hsa-mir-4464	+	Pre-miRNA flanking region
chr6@91022578	0.02	chr6	91022330	91022618	hsa-mir-4464	+	Pre-miRNA flanking region
chr6@91022583	0.03	chr6	91022330	91022618	hsa-mir-4464	+	Pre-miRNA flanking region
chr6@91022591	0.06	chr6	91022330	91022618	hsa-mir-4464	+	Pre-miRNA flanking region
chr6@91022593	0.09	chr6	91022330	91022618	hsa-mir-4464	+	Pre-miRNA flanking region
chr6@91022595	0.02	chr6	91022330	91022618	hsa-mir-4464	+	Pre-miRNA flanking region
chr6@91022597	0.04	chr6	91022330	91022618	hsa-mir-4464	+	Pre-miRNA flanking region
chr6@99572457	0.05	chr6	99572433	99572638	hsa-mir-548ai	+	Pre-miRNA flanking region
chr6@99572458	0.02	chr6	99572433	99572638	hsa-mir-548ai	+	Pre-miRNA flanking region
chr6@99572464	0.03	chr6	99572433	99572638	hsa-mir-548ai	+	Pre-miRNA flanking region
chr6@99572486	0.06	chr6	99572433	99572638	hsa-mir-548ai	+	Pre-miRNA	hsa-mir-548ai
chr6@99572488	0.06	chr6	99572433	99572638	hsa-mir-548ai	+	Pre-miRNA	hsa-mir-548ai
chr6@99572494	0.03	chr6	99572433	99572638	hsa-mir-548ai	+	Pre-miRNA	hsa-mir-548ai
chr6@99572509	0.06	chr6	99572433	99572638	hsa-mir-548ai	+	Pre-miRNA	hsa-mir-548ai
chr6@99572515	0.57	chr6	99572433	99572638	hsa-mir-548ai	+	Pre-miRNA	hsa-mir-548ai
chr6@99572516	0.02	chr6	99572433	99572638	hsa-mir-548ai	+	Pre-miRNA	hsa-mir-548ai
chr6@99572523	0.13	chr6	99572433	99572638	hsa-mir-548ai	+	Pre-miRNA	hsa-mir-548ai
chr6@99572554	0.08	chr6	99572433	99572638	hsa-mir-548ai	+	Pre-miRNA	hsa-mir-548ai
chr6@99572555	0.77	chr6	99572433	99572638	hsa-mir-548ai	+	Pre-miRNA	hsa-mir-548ai
chr6@99572556	0.05	chr6	99572433	99572638	hsa-mir-548ai	+	Pre-miRNA	hsa-mir-548ai
chr6@99572557	0.15	chr6	99572433	99572638	hsa-mir-548ai	+	Pre-miRNA	hsa-mir-548ai
chr6@99572567	0.09	chr6	99572433	99572638	hsa-mir-548ai	+	Pre-miRNA	hsa-mir-548ai
chr6@99572573	0.08	chr6	99572433	99572638	hsa-mir-548ai	+	Pre-miRNA flanking region
chr6@99572599	0.1	chr6	99572433	99572638	hsa-mir-548ai	+	Pre-miRNA flanking region
chr6@99572601	0.03	chr6	99572433	99572638	hsa-mir-548ai	+	Pre-miRNA flanking region
chr6@99572606	0.28	chr6	99572433	99572638	hsa-mir-548ai	+	Pre-miRNA flanking region
chr7@127848087	0.03	chr7	127847841	127848112	hsa-mir-129-1	+	Pre-miRNA flanking region
chr7@130135920	0.16	chr7	130135890	130136091	hsa-mir-335	+	Pre-miRNA flanking region
chr7@130135929	0.06	chr7	130135890	130136091	hsa-mir-335	+	Pre-miRNA flanking region
chr7@130135951	0.05	chr7	130135890	130136091	hsa-mir-335	+	Pre-miRNA flanking region
chr7@130135952	0.02	chr7	130135890	130136091	hsa-mir-335	+	Pre-miRNA	hsa-mir-335
chr7@34980328	0.05	chr7	34980298	34980500	hsa-mir-548n	-	Pre-miRNA flanking region
chr7@34980331	0.03	chr7	34980298	34980500	hsa-mir-548n	-	Pre-miRNA flanking region
chr7@34980332	0.03	chr7	34980298	34980500	hsa-mir-548n	-	Pre-miRNA flanking region
chr7@34980339	0.07	chr7	34980298	34980500	hsa-mir-548n	-	Pre-miRNA flanking region
chr7@34980346	0.05	chr7	34980298	34980500	hsa-mir-548n	-	Pre-miRNA flanking region
chr7@34980347	0.03	chr7	34980298	34980500	hsa-mir-548n	-	Pre-miRNA flanking region
chr7@34980348	0.02	chr7	34980298	34980500	hsa-mir-548n	-	Pre-miRNA flanking region
chr7@34980374	0.02	chr7	34980298	34980500	hsa-mir-548n	-	Pre-miRNA	hsa-mir-548n
chr7@34980384	0.11	chr7	34980298	34980500	hsa-mir-548n	-	Pre-miRNA	hsa-mir-548n
chr7@34980385	0.04	chr7	34980298	34980500	hsa-mir-548n	-	Pre-miRNA	hsa-mir-548n
chr7@34980386	0.02	chr7	34980298	34980500	hsa-mir-548n	-	Pre-miRNA	hsa-mir-548n
chr7@34980387	0.04	chr7	34980298	34980500	hsa-mir-548n	-	Pre-miRNA	hsa-mir-548n
chr7@34980391	0.09	chr7	34980298	34980500	hsa-mir-548n	-	Pre-miRNA	hsa-mir-548n
chr7@34980413	0.06	chr7	34980298	34980500	hsa-mir-548n	-	Pre-miRNA	hsa-mir-548n
chr7@34980418	0.8	chr7	34980298	34980500	hsa-mir-548n	-	Pre-miRNA	hsa-mir-548n
chr7@34980419	0.02	chr7	34980298	34980500	hsa-mir-548n	-	Pre-miRNA	hsa-mir-548n
chr7@34980420	0.05	chr7	34980298	34980500	hsa-mir-548n	-	Pre-miRNA	hsa-mir-548n
chr7@34980421	0.07	chr7	34980298	34980500	hsa-mir-548n	-	Pre-miRNA	hsa-mir-548n
chr7@34980425	0.07	chr7	34980298	34980500	hsa-mir-548n	-	Pre-miRNA	hsa-mir-548n
chr7@34980427	0.03	chr7	34980298	34980500	hsa-mir-548n	-	Pre-miRNA	hsa-mir-548n
chr7@34980428	0.03	chr7	34980298	34980500	hsa-mir-548n	-	Pre-miRNA	hsa-mir-548n
chr7@34980443	0.03	chr7	34980298	34980500	hsa-mir-548n	-	Pre-miRNA	hsa-mir-548n
chr7@98479367	0.03	chr7	98479238	98479432	hsa-mir-3609	+	Pre-miRNA flanking region
chr7@98479373	0.02	chr7	98479238	98479432	hsa-mir-3609	+	Pre-miRNA flanking region
chr7@98479374	0.12	chr7	98479238	98479432	hsa-mir-3609	+	Pre-miRNA flanking region
chr7@98479375	0.02	chr7	98479238	98479432	hsa-mir-3609	+	Pre-miRNA flanking region
chr7@98479383	0.04	chr7	98479238	98479432	hsa-mir-3609	+	Pre-miRNA flanking region
chr8@10524482	0.05	chr8	10524456	10524643	hsa-mir-4286	+	Pre-miRNA flanking region
chr8@10524483	0.07	chr8	10524456	10524643	hsa-mir-4286	+	Pre-miRNA flanking region
chr8@10524485	0.02	chr8	10524456	10524643	hsa-mir-4286	+	Pre-miRNA flanking region
chr8@10524487	0.03	chr8	10524456	10524643	hsa-mir-4286	+	Pre-miRNA flanking region
chr8@10524492	0.02	chr8	10524456	10524643	hsa-mir-4286	+	Pre-miRNA	hsa-mir-4286
chr8@10524505	0.02	chr8	10524456	10524643	hsa-mir-4286	+	Pre-miRNA	hsa-mir-4286
chr8@10524511	0.05	chr8	10524456	10524643	hsa-mir-4286	+	Pre-miRNA	hsa-mir-4286
chr8@10524526	0.03	chr8	10524456	10524643	hsa-mir-4286	+	Pre-miRNA	hsa-mir-4286
chr8@10524534	0.03	chr8	10524456	10524643	hsa-mir-4286	+	Pre-miRNA	hsa-mir-4286
chr8@10524537	0.06	chr8	10524456	10524643	hsa-mir-4286	+	Pre-miRNA	hsa-mir-4286
chr8@10524543	0.03	chr8	10524456	10524643	hsa-mir-4286	+	Pre-miRNA	hsa-mir-4286
chr8@10524545	0.04	chr8	10524456	10524643	hsa-mir-4286	+	Pre-miRNA	hsa-mir-4286
chr8@10524554	0.03	chr8	10524456	10524643	hsa-mir-4286	+	Pre-miRNA	hsa-mir-4286
chr8@10524558	0.1	chr8	10524456	10524643	hsa-mir-4286	+	Pre-miRNA	hsa-mir-4286
chr8@10524563	0.03	chr8	10524456	10524643	hsa-mir-4286	+	Pre-miRNA	hsa-mir-4286
chr8@10524565	0.21	chr8	10524456	10524643	hsa-mir-4286	+	Pre-miRNA	hsa-mir-4286
chr8@10524568	0.05	chr8	10524456	10524643	hsa-mir-4286	+	Pre-miRNA	hsa-mir-4286
chr8@10524579	0.03	chr8	10524456	10524643	hsa-mir-4286	+	Pre-miRNA	hsa-mir-4286
chr8@10524587	0.05	chr8	10524456	10524643	hsa-mir-4286	+	Pre-miRNA flanking region
chr8@10524588	0.08	chr8	10524456	10524643	hsa-mir-4286	+	Pre-miRNA flanking region
chr8@10524592	0.02	chr8	10524456	10524643	hsa-mir-4286	+	Pre-miRNA flanking region
chr8@10524595	0.02	chr8	10524456	10524643	hsa-mir-4286	+	Pre-miRNA flanking region
chr8@10524597	0.13	chr8	10524456	10524643	hsa-mir-4286	+	Pre-miRNA flanking region
chr8@10524600	0.16	chr8	10524456	10524643	hsa-mir-4286	+	Pre-miRNA flanking region
chr8@10524612	0.03	chr8	10524456	10524643	hsa-mir-4286	+	Pre-miRNA flanking region
chr8@105496581	0.03	chr8	105496555	105496725	hsa-mir-548a-3	-	Pre-miRNA flanking region
chr8@105496585	0.03	chr8	105496555	105496725	hsa-mir-548a-3	-	Pre-miRNA flanking region
chr8@105496588	0.03	chr8	105496555	105496725	hsa-mir-548a-3	-	Pre-miRNA flanking region
chr8@105496597	0.09	chr8	105496555	105496725	hsa-mir-548a-3	-	Pre-miRNA	hsa-mir-548a-3
chr8@105496598	0.02	chr8	105496555	105496725	hsa-mir-548a-3	-	Pre-miRNA	hsa-mir-548a-3
chr8@105496601	0.04	chr8	105496555	105496725	hsa-mir-548a-3	-	Pre-miRNA	hsa-mir-548a-3
chr8@105496617	0.04	chr8	105496555	105496725	hsa-mir-548a-3	-	Pre-miRNA	hsa-mir-548a-3
chr8@105496621	0.03	chr8	105496555	105496725	hsa-mir-548a-3	-	Pre-miRNA	hsa-mir-548a-3
chr8@105496627	0.02	chr8	105496555	105496725	hsa-mir-548a-3	-	Pre-miRNA	hsa-mir-548a-3
chr8@105496636	0.03	chr8	105496555	105496725	hsa-mir-548a-3	-	Pre-miRNA	hsa-mir-548a-3
chr8@105496640	0.04	chr8	105496555	105496725	hsa-mir-548a-3	-	Pre-miRNA	hsa-mir-548a-3
chr8@105496642	0.03	chr8	105496555	105496725	hsa-mir-548a-3	-	Pre-miRNA	hsa-mir-548a-3
chr8@105496646	0.06	chr8	105496555	105496725	hsa-mir-548a-3	-	Pre-miRNA	hsa-mir-548a-3
chr8@105496653	0.08	chr8	105496555	105496725	hsa-mir-548a-3	-	Pre-miRNA	hsa-mir-548a-3
chr8@105496654	0.09	chr8	105496555	105496725	hsa-mir-548a-3	-	Pre-miRNA	hsa-mir-548a-3
chr8@105496680	0.03	chr8	105496555	105496725	hsa-mir-548a-3	-	Pre-miRNA	hsa-mir-548a-3
chr8@105496684	0.03	chr8	105496555	105496725	hsa-mir-548a-3	-	Pre-miRNA	hsa-mir-548a-3
chr8@105496701	0.04	chr8	105496555	105496725	hsa-mir-548a-3	-	Pre-miRNA flanking region
chr8@105496703	0.04	chr8	105496555	105496725	hsa-mir-548a-3	-	Pre-miRNA flanking region
chr8@10892700	0.04	chr8	10892652	10892890	hsa-mir-598	-	Pre-miRNA flanking region
chr8@10892724	0.05	chr8	10892652	10892890	hsa-mir-598	-	Pre-miRNA	hsa-mir-598
chr8@10892727	0.07	chr8	10892652	10892890	hsa-mir-598	-	Pre-miRNA	hsa-mir-598
chr8@10892733	0.03	chr8	10892652	10892890	hsa-mir-598	-	Pre-miRNA	hsa-mir-598
chr8@10892741	0.05	chr8	10892652	10892890	hsa-mir-598	-	Pre-miRNA	hsa-mir-598
chr8@10892748	0.04	chr8	10892652	10892890	hsa-mir-598	-	Pre-miRNA	hsa-mir-598
chr8@120337328	0.54	chr8	120337299	120337563	hsa-mir-548az	+	Pre-miRNA flanking region
chr8@120337343	0.12	chr8	120337299	120337563	hsa-mir-548az	+	Pre-miRNA flanking region
chr8@120337365	0.02	chr8	120337299	120337563	hsa-mir-548az	+	Pre-miRNA flanking region
chr8@120337367	0.02	chr8	120337299	120337563	hsa-mir-548az	+	Pre-miRNA flanking region
chr8@120337407	0.49	chr8	120337299	120337563	hsa-mir-548az	+	Pre-miRNA flanking region
chr8@120337415	0.03	chr8	120337299	120337563	hsa-mir-548az	+	Pre-miRNA	hsa-mir-548az
chr8@120337424	0.1	chr8	120337299	120337563	hsa-mir-548az	+	Pre-miRNA	hsa-mir-548az
chr8@120337445	0.72	chr8	120337299	120337563	hsa-mir-548az	+	Pre-miRNA	hsa-mir-548az
chr8@120337446	0.73	chr8	120337299	120337563	hsa-mir-548az	+	Pre-miRNA	hsa-mir-548az
chr8@120337447	0.5	chr8	120337299	120337563	hsa-mir-548az	+	Pre-miRNA	hsa-mir-548az
chr8@120337448	0.73	chr8	120337299	120337563	hsa-mir-548az	+	Pre-miRNA	hsa-mir-548az
chr8@120337452	0.27	chr8	120337299	120337563	hsa-mir-548az	+	Pre-miRNA	hsa-mir-548az
chr8@120337454	0.55	chr8	120337299	120337563	hsa-mir-548az	+	Pre-miRNA	hsa-mir-548az
chr8@120337479	0.13	chr8	120337299	120337563	hsa-mir-548az	+	Pre-miRNA	hsa-mir-548az
chr8@120337485	0.05	chr8	120337299	120337563	hsa-mir-548az	+	Pre-miRNA	hsa-mir-548az
chr8@120337496	0.73	chr8	120337299	120337563	hsa-mir-548az	+	Pre-miRNA	hsa-mir-548az
chr8@120337503	0.06	chr8	120337299	120337563	hsa-mir-548az	+	Pre-miRNA	hsa-mir-548az
chr8@120337505	0.03	chr8	120337299	120337563	hsa-mir-548az	+	Pre-miRNA	hsa-mir-548az
chr8@120337527	0.04	chr8	120337299	120337563	hsa-mir-548az	+	Pre-miRNA flanking region
chr8@125834162	0.03	chr8	125834141	125834339	hsa-mir-4662a	+	Pre-miRNA flanking region
chr8@125834163	0.09	chr8	125834141	125834339	hsa-mir-4662a	+	Pre-miRNA flanking region
chr8@125834168	0.35	chr8	125834141	125834339	hsa-mir-4662a	+	Pre-miRNA flanking region
chr8@125834178	0.13	chr8	125834141	125834339	hsa-mir-4662a	+	Pre-miRNA flanking region
chr8@125834183	0.06	chr8	125834141	125834339	hsa-mir-4662a	+	Pre-miRNA flanking region
chr8@125834191	0.03	chr8	125834141	125834339	hsa-mir-4662a	+	Pre-miRNA flanking region
chr8@125834212	0.03	chr8	125834141	125834339	hsa-mir-4662a	+	Pre-miRNA flanking region
chr8@125834213	0.1	chr8	125834141	125834339	hsa-mir-4662a	+	Pre-miRNA flanking region
chr8@125834215	0.03	chr8	125834141	125834339	hsa-mir-4662a	+	Pre-miRNA flanking region
chr8@125834217	0.03	chr8	125834141	125834339	hsa-mir-4662a	+	Pre-miRNA flanking region
chr8@125834225	0.04	chr8	125834141	125834339	hsa-mir-4662a	+	Pre-miRNA flanking region
chr8@125834229	0.23	chr8	125834141	125834339	hsa-mir-4662a	+	Pre-miRNA	hsa-mir-4662a
chr8@125834232	0.03	chr8	125834141	125834339	hsa-mir-4662a	+	Pre-miRNA	hsa-mir-4662a
chr8@125834233	0.32	chr8	125834141	125834339	hsa-mir-4662a	+	Pre-miRNA	hsa-mir-4662a
chr8@125834240	0.24	chr8	125834141	125834339	hsa-mir-4662a	+	Pre-miRNA	hsa-mir-4662a
chr8@125834241	0.02	chr8	125834141	125834339	hsa-mir-4662a	+	Pre-miRNA	hsa-mir-4662a
chr8@125834247	0.03	chr8	125834141	125834339	hsa-mir-4662a	+	Pre-miRNA	hsa-mir-4662a
chr8@125834249	0.31	chr8	125834141	125834339	hsa-mir-4662a	+	Pre-miRNA	hsa-mir-4662a
chr8@125834250	0.32	chr8	125834141	125834339	hsa-mir-4662a	+	Pre-miRNA	hsa-mir-4662a
chr8@125834251	0.31	chr8	125834141	125834339	hsa-mir-4662a	+	Pre-miRNA	hsa-mir-4662a
chr8@125834255	0.47	chr8	125834141	125834339	hsa-mir-4662a	+	Pre-miRNA	hsa-mir-4662a
chr8@125834257	0.03	chr8	125834141	125834339	hsa-mir-4662a	+	Pre-miRNA	hsa-mir-4662a
chr8@125834258	0.14	chr8	125834141	125834339	hsa-mir-4662a	+	Pre-miRNA	hsa-mir-4662a
chr8@125834260	0.05	chr8	125834141	125834339	hsa-mir-4662a	+	Pre-miRNA	hsa-mir-4662a
chr8@125834268	0.03	chr8	125834141	125834339	hsa-mir-4662a	+	Pre-miRNA	hsa-mir-4662a
chr8@125834281	0.08	chr8	125834141	125834339	hsa-mir-4662a	+	Pre-miRNA	hsa-mir-4662a
chr8@125834282	0.03	chr8	125834141	125834339	hsa-mir-4662a	+	Pre-miRNA	hsa-mir-4662a
chr8@125834286	0.27	chr8	125834141	125834339	hsa-mir-4662a	+	Pre-miRNA	hsa-mir-4662a
chr8@125834296	0.72	chr8	125834141	125834339	hsa-mir-4662a	+	Pre-miRNA flanking region
chr8@125834297	0.23	chr8	125834141	125834339	hsa-mir-4662a	+	Pre-miRNA flanking region
chr8@125834299	0.16	chr8	125834141	125834339	hsa-mir-4662a	+	Pre-miRNA flanking region
chr8@141742747	0.05	chr8	141742592	141742776	hsa-mir-151a	-	Pre-miRNA	hsa-mir-151a
chr8@17539067	0.04	chr8	17539031	17539230	hsa-mir-548v	-	Pre-miRNA flanking region
chr8@17539125	0.71	chr8	17539031	17539230	hsa-mir-548v	-	Pre-miRNA	hsa-mir-548v
chr8@77879006	0.04	chr8	77878977	77879154	hsa-mir-3149	-	Pre-miRNA	hsa-mir-3149
chr8@77879010	0.03	chr8	77878977	77879154	hsa-mir-3149	-	Pre-miRNA	hsa-mir-3149
chr8@77879012	0.03	chr8	77878977	77879154	hsa-mir-3149	-	Pre-miRNA	hsa-mir-3149
chr8@77879018	0.02	chr8	77878977	77879154	hsa-mir-3149	-	Pre-miRNA	hsa-mir-3149
chr8@77879022	0.03	chr8	77878977	77879154	hsa-mir-3149	-	Pre-miRNA	hsa-mir-3149
chr8@77879065	0.03	chr8	77878977	77879154	hsa-mir-3149	-	Pre-miRNA	hsa-mir-3149
chr8@77879085	0.02	chr8	77878977	77879154	hsa-mir-3149	-	Pre-miRNA	hsa-mir-3149
chr8@94928280	0.03	chr8	94928171	94928414	hsa-mir-378d-2	-	Pre-miRNA	hsa-mir-378d-2
chr8@94928282	0.07	chr8	94928171	94928414	hsa-mir-378d-2	-	Pre-miRNA	hsa-mir-378d-2
chr8@94928285	0.02	chr8	94928171	94928414	hsa-mir-378d-2	-	Pre-miRNA	hsa-mir-378d-2
chr8@94928289	0.02	chr8	94928171	94928414	hsa-mir-378d-2	-	Pre-miRNA	hsa-mir-378d-2
chr8@94928293	0.03	chr8	94928171	94928414	hsa-mir-378d-2	-	Pre-miRNA	hsa-mir-378d-2
chr8@94928299	0.05	chr8	94928171	94928414	hsa-mir-378d-2	-	Pre-miRNA	hsa-mir-378d-2
chr8@94928302	0.04	chr8	94928171	94928414	hsa-mir-378d-2	-	Pre-miRNA	hsa-mir-378d-2
chr8@94928303	0.02	chr8	94928171	94928414	hsa-mir-378d-2	-	Pre-miRNA	hsa-mir-378d-2
chr8@94928304	0.03	chr8	94928171	94928414	hsa-mir-378d-2	-	Pre-miRNA	hsa-mir-378d-2
chr8@94928313	0.02	chr8	94928171	94928414	hsa-mir-378d-2	-	Pre-miRNA	hsa-mir-378d-2
chr8@94928318	0.03	chr8	94928171	94928414	hsa-mir-378d-2	-	Pre-miRNA	hsa-mir-378d-2
chr8@94928319	0.05	chr8	94928171	94928414	hsa-mir-378d-2	-	Pre-miRNA	hsa-mir-378d-2
chr8@94928324	0.04	chr8	94928171	94928414	hsa-mir-378d-2	-	Pre-miRNA	hsa-mir-378d-2
[truncated: 5,276 more rows]
