# Supplementary material for: Sense–antisense miRNA pairs constitute an elaborate reciprocal regulatory circuit
Source: HighWire-hosted journal article supplement (doi:10.1101/gr.257121.119), 2020-05-01
Supplement: Supplemental_Table_S3.xlsx [file Supplemental_Table_S3.xlsx]

## Sheet: Sheet1
Supplemental Table S3. Sanger sequencing verification of selected A-to-G sites in miRNA-ATs.
miRNA-AT name	Site	Sequence	Editing level (miR-mmPCR-seq)	Tissue	Sanger trace (cDNA template)	Sanger trace (DNA template)	If edited(Judged by Sanger sequencing)
miRNA-135b-AT	chr1@205417449	ACTGTAGCCCA	0.114	Substantia_nigra_N10			N
miRNA-135b-AT	chr1@205417511	GCCATAGGCCA	0.3645	Substantia_nigra_N10			Y
miRNA-135b-AT	chr1@205417449	ACTGTAGCCCA	0.4135	Frontal_gyrus_N13			N
miRNA-135b-AT	chr1@205417495	CACATAGGAAT	0.2545	Frontal_gyrus_N13			Y
miRNA-135b-AT	chr1@205417511	GCCATAGGCCA	0.8135	Frontal_gyrus_N13			Y
miRNA-135b-AT	chr1@205417511	GCCATAGGCCA	0.66	Frontal_gyrus_N10			Y
miRNA-135b-AT	chr1@205417511	GCCATAGGCCA	0.1645	Cerebellar_cortex_N13			Y
miRNA-135b-AT	chr1@205417511	GCCATAGGCCA	0.229	Cerebellar_cortex_N10			Y
miRNA-135b-AT	chr1@205417449	ACTGTAGCCCA	0.2245	Callosum_N10			Y
miRNA-135b-AT	chr1@205417495	CACATAGGAAT	0.1575	Callosum_N10			Y
miRNA-135b-AT	chr1@205417511	GCCATAGGCCA	0.8085	Callosum_N10			Y
miRNA-135b-AT	chr1@205417449	ACTGTAGCCCA	0.214	Anterior_cingulate_cortex_N10			Y
miRNA-135b-AT	chr1@205417495	CACATAGGAAT	0.1305	Anterior_cingulate_cortex_N10			N
miRNA-135b-AT	chr1@205417511	GCCATAGGCCA	0.6525	Anterior_cingulate_cortex_N10			Y
miRNA-142-AT	chr17@56408599	ACAGTACACTC	0.712	Substantia_nigra_N10			Y
miRNA-142-AT	chr17@56408621	AGGAAACACTA	0.104	Substantia_nigra_N10			N
miRNA-142-AT	chr17@56408599	ACAGTACACTC	0.9865	Frontal_gyrus_N13			Y
miRNA-142-AT	chr17@56408621	AGGAAACACTA	0.149	Frontal_gyrus_N13			N
miRNA-142-AT	chr17@56408599	ACAGTACACTC	0.4825	Frontal_gyrus_N10			Y
miRNA-142-AT	chr17@56408599	ACAGTACACTC	0.9805	Cerebellar_cortex_N13			Y
miRNA-142-AT	chr17@56408599	ACAGTACACTC	0.984	Cerebellar_cortex_N10			Y
miRNA-142-AT	chr17@56408599	ACAGTACACTC	0.677	Callosum_N13			Y
miRNA-142-AT	chr17@56408599	ACAGTACACTC	0.9505	Callosum_N10			Y
miRNA-142-AT	chr17@56408599	ACAGTACACTC	0.941	Anterior_cingulate_cortex_N13			Y
miRNA-142-AT	chr17@56408621	AGGAAACACTA	0.135	Anterior_cingulate_cortex_N13			N
miRNA-184-AT	chr15@79502210	TGTCAATCACC	0.4375	Frontal_gyrus_N13			Y
miRNA-184-AT	chr15@79502210	TGTCAATCACC	0.36	Cerebellar_cortex_N10			Y
miRNA-184-AT	chr15@79502203	CACCTACCCTT	0.301	Anterior_cingulate_cortex_N10			Y
miRNA-184-AT	chr15@79502210	TGTCAATCACC	0.3475	Anterior_cingulate_cortex_N10			Y
miRNA-184-AT	chr15@79502211	GTGTCAATCAC	0.1095	Anterior_cingulate_cortex_N10			Y
miRNA-33a-AT	chr22@42296969	ATGCAATGCAA	0.1475	Substantia_nigra_N10			Y
miRNA-33a-AT	chr22@42297022	CAGGCAGGCCT	0.582	Substantia_nigra_N10			Y
miRNA-33a-AT	chr22@42297022	CAGGCAGGCCT	0.462	Frontal_gyrus_N13			Y
miRNA-33a-AT	chr22@42296969	ATGCAATGCAA	0.1785	Frontal_gyrus_N10			Y
miRNA-33a-AT	chr22@42297022	CAGGCAGGCCT	0.602	Frontal_gyrus_N10			Y
miRNA-33a-AT	chr22@42297022	CAGGCAGGCCT	0.6065	Cerebellar_cortex_N13			Y
miRNA-33a-AT	chr22@42296969	ATGCAATGCAA	0.1325	Cerebellar_cortex_N10			Y
miRNA-33a-AT	chr22@42296970	CATGCAATGCA	0.1035	Cerebellar_cortex_N10			N
miRNA-33a-AT	chr22@42297022	CAGGCAGGCCT	0.6485	Cerebellar_cortex_N10			Y
miRNA-33a-AT	chr22@42296969	ATGCAATGCAA	0.1325	Callosum_N13			Y
miRNA-33a-AT	chr22@42296970	CATGCAATGCA	0.1035	Callosum_N13			N
miRNA-33a-AT	chr22@42297022	CAGGCAGGCCT	0.904	Callosum_N13			Y
miRNA-33a-AT	chr22@42296969	ATGCAATGCAA	0.1925	Callosum_N10			Y
miRNA-33a-AT	chr22@42297022	CAGGCAGGCCT	0.5875	Callosum_N10			Y
miRNA-33a-AT	chr22@42296958	CTACAATGCAC	0.1015	Anterior_cingulate_cortex_N13			N
miRNA-33a-AT	chr22@42296969	ATGCAATGCAA	0.1005	Anterior_cingulate_cortex_N13			N
miRNA-33a-AT	chr22@42297022	CAGGCAGGCCT	0.11	Anterior_cingulate_cortex_N13			Y
miRNA-33a-AT	chr22@42296958	CTACAATGCAC	0.1015	Anterior_cingulate_cortex_N10			Y
miRNA-33a-AT	chr22@42296969	ATGCAATGCAA	0.1005	Anterior_cingulate_cortex_N10			Y
miRNA-33a-AT	chr22@42297022	CAGGCAGGCCT	0.1	Anterior_cingulate_cortex_N10			Y
miRNA-371a-AT	chr19@54290993	GCGGTAACACT	0.103	Substantia_nigra_N10			Y
miRNA-371a-AT	chr19@54290895	TCGCAAGTGGA	0.171	Frontal_gyrus_N13			N
miRNA-371a-AT	chr19@54290992	CGGTAACACTC	0.1715	Frontal_gyrus_N13			Y
miRNA-371a-AT	chr19@54290993	GCGGTAACACT	0.97	Frontal_gyrus_N13			Y
miRNA-371a-AT	chr19@54290954	GCAGAAAGTGC	0.1705	Callosum_N10			N
miRNA-371a-AT	chr19@54290992	CGGTAACACTC	0.1715	Callosum_N10			N
miRNA-371a-AT	chr19@54290993	GCGGTAACACT	0.169	Callosum_N10			N
miRNA-371a-AT	chr19@54290953	CAGAAAGTGCC	0.438	Anterior_cingulate_cortex_N10			Y
miRNA-371a-AT	chr19@54290992	CGGTAACACTC	0.4825	Anterior_cingulate_cortex_N10			Y
miRNA-371a-AT	chr19@54290993	GCGGTAACACT	0.1705	Anterior_cingulate_cortex_N10			Y
miRNA-371a-AT	chr19@54290999	TCTCAAGCGGT	0.686	Anterior_cingulate_cortex_N10			Y
miRNA-424-AT	chrX@133680715	TTCAAAACATG	0.196	Frontal_gyrus_N10			N
miRNA-424-AT	chrX@133680715	TTCAAAACATG	0.1115	Cerebellar_cortex_N10			N
miRNA-424-AT	chrX@133680718	AAAACATGAAT	0.275	Cerebellar_cortex_N10			N
miRNA-424-AT	chrX@133680715	TTCAAAACATG	0.3135	Callosum_N13			Y
miRNA-424-AT	chrX@133680718	AAAACATGAAT	0.2185	Callosum_N13			Y
miRNA-424-AT	chrX@133680713	ACTTCAAAACA	0.144	Anterior_cingulate_cortex_N13			N
miRNA-424-AT	chrX@133680714	CTTCAAAACAT	0.196	Anterior_cingulate_cortex_N13			N
miRNA-424-AT	chrX@133680715	TTCAAAACATG	0.584	Anterior_cingulate_cortex_N13			Y
miRNA-424-AT	chrX@133680718	AAAACATGAAT	0.6785	Anterior_cingulate_cortex_N13			Y
miRNA-424-AT	chrX@133680713	ACTTCAAAACA	0.1925	Anterior_cingulate_cortex_N10			N
miRNA-424-AT	chrX@133680715	TTCAAAACATG	0.574	Anterior_cingulate_cortex_N10			Y
miRNA-424-AT	chrX@133680718	AAAACATGAAT	0.692	Anterior_cingulate_cortex_N10			Y
miRNA-451a-AT	chr17@27188396	GGTATAGCAAG	1	Substantia_nigra_N10			Y
miRNA-451a-AT	chr17@27188429	TCAGTAATGGT	0.6625	Substantia_nigra_N10			Y
miRNA-451a-AT	chr17@27188430	CAGTAATGGTA	0.158	Substantia_nigra_N10			Y
miRNA-451a-AT	chr17@27188394	TGGGTATAGCA	0.1875	Frontal_gyrus_N10			Y
miRNA-451a-AT	chr17@27188396	GGTATAGCAAG	0.798	Frontal_gyrus_N10			Y
miRNA-451a-AT	chr17@27188429	TCAGTAATGGT	0.22	Frontal_gyrus_N10			Y
miRNA-451a-AT	chr17@27188396	GGTATAGCAAG	0.941	Cerebellar_cortex_N13			Y
miRNA-451a-AT	chr17@27188429	TCAGTAATGGT	0.226	Cerebellar_cortex_N13			Y
miRNA-451a-AT	chr17@27188394	TGGGTATAGCA	0.11	Cerebellar_cortex_N10			Y
miRNA-451a-AT	chr17@27188396	GGTATAGCAAG	0.938	Cerebellar_cortex_N10			Y
miRNA-451a-AT	chr17@27188400	TAGCAAGAGAA	0.1125	Cerebellar_cortex_N10			N
miRNA-451a-AT	chr17@27188429	TCAGTAATGGT	0.328	Cerebellar_cortex_N10			Y
miRNA-451a-AT	chr17@27188394	TGGGTATAGCA	0.3055	Callosum_N13			Y
miRNA-451a-AT	chr17@27188396	GGTATAGCAAG	0.946	Callosum_N13			Y
miRNA-451a-AT	chr17@27188394	TGGGTATAGCA	0.327	Callosum_N10			N
miRNA-451a-AT	chr17@27188435	ATGGTAACGGT	0.243	Callosum_N10			Y
miRNA-451a-AT	chr17@27188429	TCAGTAATGGT	0.5935	Callosum_N10			Y
miRNA-451a-AT	chr17@27188430	CAGTAATGGTA	0.131	Callosum_N10			Y
miRNA-451a-AT	chr17@27188396	GGTATAGCAAG	1	Anterior_cingulate_cortex_N13			Y
miRNA-451a-AT	chr17@27188394	TGGGTATAGCA	0.3055	Anterior_cingulate_cortex_N10			Y
miRNA-451a-AT	chr17@27188396	GGTATAGCAAG	0.946	Anterior_cingulate_cortex_N10			Y
miRNA-451a-AT	chr17@27188417	CCATTACTAAA	0.104	Anterior_cingulate_cortex_N10			N
miRNA-451a-AT	chr17@27188429	TCAGTAATGGT	0.5935	Anterior_cingulate_cortex_N10			Y
miRNA-451a-AT	chr17@27188430	CAGTAATGGTA	0.131	Anterior_cingulate_cortex_N10			Y
miRNA-548ak-AT	chr10@12172753	ATATTAGGTTG	0.684	Substantia_nigra_N10			Y
miRNA-548ak-AT	chr10@12172746	ATCCAAAATAT	0.1845	Frontal_gyrus_N13			Y
miRNA-548ak-AT	chr10@12172747	TCCAAAATATT	0.2465	Frontal_gyrus_N13			Y
miRNA-548ak-AT	chr10@12172753	ATATTAGGTTG	0.893	Frontal_gyrus_N13			Y
miRNA-548ak-AT	chr10@12172753	ATATTAGGTTG	0.5065	Frontal_gyrus_N10			Y
miRNA-548ak-AT	chr10@12172753	ATATTAGGTTG	0.82	Cerebellar_cortex_N13			Y
miRNA-548ak-AT	chr10@12172753	ATATTAGGTTG	0.678	Cerebellar_cortex_N10			Y
miRNA-548ak-AT	chr10@12172753	ATATTAGGTTG	0.6145	Callosum_N13			Y
miRNA-548ak-AT	chr10@12172747	TCCAAAATATT	0.0865	Callosum_N10			N
miRNA-548ak-AT	chr10@12172753	ATATTAGGTTG	0.6105	Callosum_N10			Y
miRNA-548ak-AT	chr10@12172746	ATCCAAAATAT	0.106	Anterior_cingulate_cortex_N13			Y
miRNA-548ak-AT	chr10@12172747	TCCAAAATATT	0.22	Anterior_cingulate_cortex_N13			Y
miRNA-548ak-AT	chr10@12172753	ATATTAGGTTG	0.6595	Anterior_cingulate_cortex_N13			Y
miRNA-548ak-AT	chr10@12172746	ATCCAAAATAT	0.1345	Anterior_cingulate_cortex_N10			Y
miRNA-548ak-AT	chr10@12172747	TCCAAAATATT	0.254	Anterior_cingulate_cortex_N10			Y
miRNA-548ak-AT	chr10@12172753	ATATTAGGTTG	0.839	Anterior_cingulate_cortex_N10			Y
