# Supplementary material for: Sense–antisense miRNA pairs constitute an elaborate reciprocal regulatory circuit
Source: HighWire-hosted journal article supplement (doi:10.1101/gr.257121.119), 2020-05-01
Supplement: Supplemental_Table_S4.xlsx [file Supplemental_Table_S4.xlsx]

## Sheet: FANTOM_lv1_annot
Supplemental Table S4. miRNA-ATs that are overlapped with FANTOM5 5'complete transcripts.
Name	Chr	Start	End	Strand	Annotation
hsa-mir-675	chr11	2016409	2151496	+	gene_id "CATG00000001347.1"; geneSuperClass "uncertain_coding"; geneClass "uncertain_coding"; geneSubClass "CPAT_coding_evidence_uncertain"; gene_type "__na"; gene_name "CATG00000001347.1"; coding_status "uncertain"; cumulative_support "ENCODE:HUBDMAP"; geneCategory "__na"; DHS_type "DHS_dyadic";
hsa-mir-483	chr11	2150349	2160250	+	gene_id "CATG00000001354.1"; geneSuperClass "all_mRNA"; geneClass "coding_mRNA"; geneSubClass "unannotated_CPAT_coding"; gene_type "__na"; gene_name "CATG00000001354.1"; coding_status "coding"; cumulative_support "ENCODE"; geneCategory "__na"; DHS_type "DHS_enhancer";
hsa-mir-192	chr11	64655419	64659170	+	gene_id "CATG00000002619.1"; geneSuperClass "all_lncRNA"; geneClass "lncRNA_divergent"; geneSubClass "convergent_promoters"; gene_type "__na"; gene_name "CATG00000002619.1"; coding_status "nonCoding"; cumulative_support "HUBDMAP:MITRANS"; geneCategory "e_lncRNA"; DHS_type "DHS_enhancer";
hsa-mir-194-2	chr11	64655419	64659170	+	gene_id "CATG00000002619.1"; geneSuperClass "all_lncRNA"; geneClass "lncRNA_divergent"; geneSubClass "convergent_promoters"; gene_type "__na"; gene_name "CATG00000002619.1"; coding_status "nonCoding"; cumulative_support "HUBDMAP:MITRANS"; geneCategory "e_lncRNA"; DHS_type "DHS_enhancer";
hsa-mir-139	chr11	72317289	72330288	+	gene_id "CATG00000002872.1"; geneSuperClass "all_mRNA"; geneClass "coding_mRNA"; geneSubClass "unannotated_CPAT_coding"; gene_type "__na"; gene_name "CATG00000002872.1"; coding_status "coding"; cumulative_support "MITRANS"; geneCategory "__na"; DHS_type "DHS_enhancer";
hsa-mir-101-1	chr1	65506803	65537002	+	gene_id "CATG00000003118.1"; geneSuperClass "uncertain_coding"; geneClass "uncertain_coding"; geneSubClass "CPAT_coding_evidence_uncertain"; gene_type "__na"; gene_name "CATG00000003118.1"; coding_status "uncertain"; cumulative_support "FANTOM:MITRANS"; geneCategory "__na"; DHS_type "DHS_promoter";
hsa-mir-2682	chr1	98494629	98512417	+	gene_id "CATG00000009516.1"; geneSuperClass "all_lncRNA"; geneClass "lncRNA_intergenic"; geneSubClass "far_from_coding_genes"; gene_type "__na"; gene_name "CATG00000009516.1"; coding_status "nonCoding"; cumulative_support "ENCODE:FANTOM:HUBDMAP:MITRANS"; geneCategory "p_lncRNA_intergenic"; DHS_type "DHS_promoter";
hsa-mir-137	chr1	98494629	98512417	+	gene_id "CATG00000009516.1"; geneSuperClass "all_lncRNA"; geneClass "lncRNA_intergenic"; geneSubClass "far_from_coding_genes"; gene_type "__na"; gene_name "CATG00000009516.1"; coding_status "nonCoding"; cumulative_support "ENCODE:FANTOM:HUBDMAP:MITRANS"; geneCategory "p_lncRNA_intergenic"; DHS_type "DHS_promoter";
hsa-mir-34a	chr1	9207889	9218213	+	gene_id "CATG00000010349.1"; geneSuperClass "all_lncRNA"; geneClass "lncRNA_intergenic"; geneSubClass "far_from_coding_genes"; gene_type "__na"; gene_name "CATG00000010349.1"; coding_status "nonCoding"; cumulative_support "MITRANS"; geneCategory "__na"; DHS_type "not_DHS";
hsa-mir-331	chr12	95696943	95709085	-	gene_id "CATG00000012945.1"; geneSuperClass "all_lncRNA"; geneClass "lncRNA_intergenic"; geneSubClass "proximal_to_coding_genes_antisense_strand"; gene_type "__na"; gene_name "CATG00000012945.1"; coding_status "nonCoding"; cumulative_support "MITRANS"; geneCategory "__na"; DHS_type "not_DHS";
hsa-mir-548ac	chr1	117008837	117123561	+	gene_id "CATG00000014352.1"; geneSuperClass "uncertain_coding"; geneClass "uncertain_coding"; geneSubClass "CPAT_coding_evidence_uncertain"; gene_type "__na"; gene_name "CATG00000014352.1"; coding_status "uncertain"; cumulative_support "ENCODE:FANTOM:HUBDMAP:MITRANS"; geneCategory "__na"; DHS_type "DHS_promoter";
hsa-mir-548ac	chr1	117094379	117103274	+	gene_id "CATG00000014362.1"; geneSuperClass "all_lncRNA"; geneClass "lncRNA_divergent"; geneSubClass "divergent_promoters"; gene_type "__na"; gene_name "CATG00000014362.1"; coding_status "nonCoding"; cumulative_support "ENCODE:FANTOM"; geneCategory "e_lncRNA"; DHS_type "DHS_enhancer";
hsa-mir-3168	chr13	41438699	42113102	+	gene_id "CATG00000014478.1"; geneSuperClass "all_lncRNA"; geneClass "lncRNA_divergent"; geneSubClass "divergent_promoters"; gene_type "__na"; gene_name "CATG00000014478.1"; coding_status "nonCoding"; cumulative_support "FANTOM"; geneCategory "__na"; DHS_type "not_DHS";
hsa-mir-1297	chr13	54799413	54930177	+	gene_id "CATG00000014904.1"; geneSuperClass "all_lncRNA"; geneClass "lncRNA_intergenic"; geneSubClass "far_from_coding_genes"; gene_type "__na"; gene_name "CATG00000014904.1"; coding_status "nonCoding"; cumulative_support "ENCODE:FANTOM:HUBDMAP:MITRANS"; geneCategory "p_lncRNA_intergenic"; DHS_type "DHS_promoter";
hsa-mir-1297	chr13	54881414	54984757	+	gene_id "CATG00000014909.1"; geneSuperClass "all_lncRNA"; geneClass "lncRNA_intergenic"; geneSubClass "far_from_coding_genes"; gene_type "__na"; gene_name "CATG00000014909.1"; coding_status "nonCoding"; cumulative_support "ENCODE:FANTOM:HUBDMAP"; geneCategory "__na"; DHS_type "not_DHS";
hsa-mir-548x-2	chr13	66515204	66691449	+	gene_id "CATG00000015154.1"; geneSuperClass "all_lncRNA"; geneClass "lncRNA_intergenic"; geneSubClass "far_from_coding_genes"; gene_type "__na"; gene_name "CATG00000015154.1"; coding_status "nonCoding"; cumulative_support "ENCODE:FANTOM:HUBDMAP:MITRANS"; geneCategory "__na"; DHS_type "not_DHS";
hsa-mir-4502	chr13	115034486	115047278	-	gene_id "CATG00000018170.1"; geneSuperClass "all_lncRNA"; geneClass "lncRNA_divergent"; geneSubClass "convergent_promoters"; gene_type "__na"; gene_name "CATG00000018170.1"; coding_status "nonCoding"; cumulative_support "FANTOM:HUBDMAP:MITRANS"; geneCategory "p_lncRNA_divergent"; DHS_type "DHS_promoter";
hsa-mir-4710	chr14	105143704	105144655	+	gene_id "CATG00000020269.1"; geneSuperClass "all_lncRNA"; geneClass "lncRNA_intergenic"; geneSubClass "far_from_coding_genes"; gene_type "__na"; gene_name "CATG00000020269.1"; coding_status "nonCoding"; cumulative_support "FANTOM"; geneCategory "__na"; DHS_type "DHS_dyadic";
hsa-mir-493	chr14	101327311	101373760	-	gene_id "CATG00000022083.1"; geneSuperClass "all_mRNA"; geneClass "coding_mRNA"; geneSubClass "unannotated_CPAT_coding"; gene_type "__na"; gene_name "CATG00000022083.1"; coding_status "coding"; cumulative_support "FANTOM:MITRANS"; geneCategory "__na"; DHS_type "not_DHS";
hsa-mir-337	chr14	101327311	101373760	-	gene_id "CATG00000022083.1"; geneSuperClass "all_mRNA"; geneClass "coding_mRNA"; geneSubClass "unannotated_CPAT_coding"; gene_type "__na"; gene_name "CATG00000022083.1"; coding_status "coding"; cumulative_support "FANTOM:MITRANS"; geneCategory "__na"; DHS_type "not_DHS";
hsa-mir-665	chr14	101327311	101373760	-	gene_id "CATG00000022083.1"; geneSuperClass "all_mRNA"; geneClass "coding_mRNA"; geneSubClass "unannotated_CPAT_coding"; gene_type "__na"; gene_name "CATG00000022083.1"; coding_status "coding"; cumulative_support "FANTOM:MITRANS"; geneCategory "__na"; DHS_type "not_DHS";
hsa-mir-431	chr14	101327311	101373760	-	gene_id "CATG00000022083.1"; geneSuperClass "all_mRNA"; geneClass "coding_mRNA"; geneSubClass "unannotated_CPAT_coding"; gene_type "__na"; gene_name "CATG00000022083.1"; coding_status "coding"; cumulative_support "FANTOM:MITRANS"; geneCategory "__na"; DHS_type "not_DHS";
hsa-mir-433	chr14	101327311	101373760	-	gene_id "CATG00000022083.1"; geneSuperClass "all_mRNA"; geneClass "coding_mRNA"; geneSubClass "unannotated_CPAT_coding"; gene_type "__na"; gene_name "CATG00000022083.1"; coding_status "coding"; cumulative_support "FANTOM:MITRANS"; geneCategory "__na"; DHS_type "not_DHS";
hsa-mir-127	chr14	101327311	101373760	-	gene_id "CATG00000022083.1"; geneSuperClass "all_mRNA"; geneClass "coding_mRNA"; geneSubClass "unannotated_CPAT_coding"; gene_type "__na"; gene_name "CATG00000022083.1"; coding_status "coding"; cumulative_support "FANTOM:MITRANS"; geneCategory "__na"; DHS_type "not_DHS";
hsa-mir-432	chr14	101327311	101373760	-	gene_id "CATG00000022083.1"; geneSuperClass "all_mRNA"; geneClass "coding_mRNA"; geneSubClass "unannotated_CPAT_coding"; gene_type "__na"; gene_name "CATG00000022083.1"; coding_status "coding"; cumulative_support "FANTOM:MITRANS"; geneCategory "__na"; DHS_type "not_DHS";
hsa-mir-136	chr14	101327311	101373760	-	gene_id "CATG00000022083.1"; geneSuperClass "all_mRNA"; geneClass "coding_mRNA"; geneSubClass "unannotated_CPAT_coding"; gene_type "__na"; gene_name "CATG00000022083.1"; coding_status "coding"; cumulative_support "FANTOM:MITRANS"; geneCategory "__na"; DHS_type "not_DHS";
hsa-mir-2116	chr15	59458765	59464430	+	gene_id "CATG00000023182.1"; geneSuperClass "all_lncRNA"; geneClass "lncRNA_antisense"; geneSubClass "ref_within_qry"; gene_type "__na"; gene_name "CATG00000023182.1"; coding_status "nonCoding"; cumulative_support "FANTOM"; geneCategory "e_lncRNA"; DHS_type "DHS_enhancer";
hsa-mir-1276	chr15	86312964	86319308	+	gene_id "CATG00000023947.1"; geneSuperClass "all_lncRNA"; geneClass "lncRNA_divergent"; geneSubClass "convergent_promoters"; gene_type "__na"; gene_name "CATG00000023947.1"; coding_status "nonCoding"; cumulative_support "MITRANS"; geneCategory "e_lncRNA"; DHS_type "DHS_enhancer";
hsa-mir-548h-2	chr16	11263002	11404876	+	gene_id "CATG00000026620.1"; geneSuperClass "all_lncRNA"; geneClass "lncRNA_intergenic"; geneSubClass "proximal_to_coding_genes_both_strand"; gene_type "__na"; gene_name "CATG00000026620.1"; coding_status "nonCoding"; cumulative_support "ENCODE"; geneCategory "e_lncRNA"; DHS_type "DHS_enhancer";
hsa-mir-548h-3	chr17	13444767	13454311	+	gene_id "CATG00000030748.1"; geneSuperClass "all_lncRNA"; geneClass "lncRNA_divergent"; geneSubClass "divergent_promoters"; gene_type "__na"; gene_name "CATG00000030748.1"; coding_status "nonCoding"; cumulative_support "FANTOM:MITRANS"; geneCategory "e_lncRNA"; DHS_type "DHS_enhancer";
hsa-mir-3929	chr18	33502608	33520064	+	gene_id "CATG00000035597.1"; geneSuperClass "all_lncRNA"; geneClass "lncRNA_intergenic"; geneSubClass "far_from_coding_genes"; gene_type "__na"; gene_name "CATG00000035597.1"; coding_status "nonCoding"; cumulative_support "HUBDMAP"; geneCategory "__na"; DHS_type "not_DHS";
hsa-mir-3940	chr19	6413362	6416706	+	gene_id "CATG00000038364.1"; geneSuperClass "all_mRNA"; geneClass "coding_mRNA"; geneSubClass "unannotated_CPAT_coding"; gene_type "__na"; gene_name "CATG00000038364.1"; coding_status "coding"; cumulative_support "MITRANS"; geneCategory "__na"; DHS_type "DHS_enhancer";
hsa-mir-3940	chr19	6413584	6417317	+	gene_id "CATG00000038365.1"; geneSuperClass "all_mRNA"; geneClass "coding_mRNA"; geneSubClass "unannotated_CPAT_coding"; gene_type "__na"; gene_name "CATG00000038365.1"; coding_status "coding"; cumulative_support "HUBDMAP:MITRANS"; geneCategory "__na"; DHS_type "DHS_enhancer";
hsa-mir-199a-1	chr19	10918244	11162168	+	gene_id "CATG00000038535.1"; geneSuperClass "all_lncRNA"; geneClass "lncRNA_intergenic"; geneSubClass "proximal_to_coding_genes_both_strand"; gene_type "__na"; gene_name "CATG00000038535.1"; coding_status "nonCoding"; cumulative_support "ENCODE"; geneCategory "__na"; DHS_type "not_DHS";
hsa-mir-7975	chr19	55629283	55636935	+	gene_id "CATG00000039828.1"; geneSuperClass "uncertain_coding"; geneClass "uncertain_coding"; geneSubClass "CPAT_coding_evidence_uncertain"; gene_type "__na"; gene_name "CATG00000039828.1"; coding_status "uncertain"; cumulative_support "ENCODE:FANTOM:MITRANS"; geneCategory "__na"; DHS_type "DHS_promoter";
hsa-mir-5196	chr19	35835785	35837604	-	gene_id "CATG00000040792.1"; geneSuperClass "all_lncRNA"; geneClass "lncRNA_antisense"; geneSubClass "ref_within_qry"; gene_type "__na"; gene_name "CATG00000040792.1"; coding_status "nonCoding"; cumulative_support "FANTOM"; geneCategory "e_lncRNA"; DHS_type "DHS_enhancer";
hsa-mir-526b	chr19	54196724	54220028	-	gene_id "CATG00000041402.1"; geneSuperClass "all_lncRNA"; geneClass "lncRNA_intergenic"; geneSubClass "far_from_coding_genes"; gene_type "__na"; gene_name "CATG00000041402.1"; coding_status "nonCoding"; cumulative_support "HUBDMAP"; geneCategory "e_lncRNA"; DHS_type "DHS_enhancer";
hsa-mir-523	chr19	54196724	54220028	-	gene_id "CATG00000041402.1"; geneSuperClass "all_lncRNA"; geneClass "lncRNA_intergenic"; geneSubClass "far_from_coding_genes"; gene_type "__na"; gene_name "CATG00000041402.1"; coding_status "nonCoding"; cumulative_support "HUBDMAP"; geneCategory "e_lncRNA"; DHS_type "DHS_enhancer";
hsa-mir-520b	chr19	54196724	54220028	-	gene_id "CATG00000041402.1"; geneSuperClass "all_lncRNA"; geneClass "lncRNA_intergenic"; geneSubClass "far_from_coding_genes"; gene_type "__na"; gene_name "CATG00000041402.1"; coding_status "nonCoding"; cumulative_support "HUBDMAP"; geneCategory "e_lncRNA"; DHS_type "DHS_enhancer";
hsa-mir-524	chr19	54196724	54220028	-	gene_id "CATG00000041402.1"; geneSuperClass "all_lncRNA"; geneClass "lncRNA_intergenic"; geneSubClass "far_from_coding_genes"; gene_type "__na"; gene_name "CATG00000041402.1"; coding_status "nonCoding"; cumulative_support "HUBDMAP"; geneCategory "e_lncRNA"; DHS_type "DHS_enhancer";
hsa-mir-519d	chr19	54196724	54220028	-	gene_id "CATG00000041402.1"; geneSuperClass "all_lncRNA"; geneClass "lncRNA_intergenic"; geneSubClass "far_from_coding_genes"; gene_type "__na"; gene_name "CATG00000041402.1"; coding_status "nonCoding"; cumulative_support "HUBDMAP"; geneCategory "e_lncRNA"; DHS_type "DHS_enhancer";
hsa-mir-200a	chr1	1087776	1107196	-	gene_id "CATG00000043113.1"; geneSuperClass "uncertain_coding"; geneClass "uncertain_coding"; geneSubClass "CPAT_coding_evidence_uncertain"; gene_type "__na"; gene_name "CATG00000043113.1"; coding_status "uncertain"; cumulative_support "ENCODE:FANTOM"; geneCategory "__na"; DHS_type "DHS_promoter";
hsa-mir-429	chr1	1087776	1107196	-	gene_id "CATG00000043113.1"; geneSuperClass "uncertain_coding"; geneClass "uncertain_coding"; geneSubClass "CPAT_coding_evidence_uncertain"; gene_type "__na"; gene_name "CATG00000043113.1"; coding_status "uncertain"; cumulative_support "ENCODE:FANTOM"; geneCategory "__na"; DHS_type "DHS_promoter";
hsa-mir-4430	chr2	33634757	33645721	-	gene_id "CATG00000048085.1"; geneSuperClass "all_lncRNA"; geneClass "lncRNA_intergenic"; geneSubClass "far_from_coding_genes"; gene_type "__na"; gene_name "CATG00000048085.1"; coding_status "nonCoding"; cumulative_support "MITRANS"; geneCategory "__na"; DHS_type "not_DHS";
hsa-mir-3606	chr2	189858790	189860493	-	gene_id "CATG00000050959.1"; geneSuperClass "all_lncRNA"; geneClass "lncRNA_divergent"; geneSubClass "convergent_promoters"; gene_type "__na"; gene_name "CATG00000050959.1"; coding_status "nonCoding"; cumulative_support "FANTOM:HUBDMAP"; geneCategory "__na"; DHS_type "not_DHS";
hsa-mir-4532	chr20	56464329	56483565	-	gene_id "CATG00000055319.1"; geneSuperClass "all_lncRNA"; geneClass "lncRNA_intergenic"; geneSubClass "far_from_coding_genes"; gene_type "__na"; gene_name "CATG00000055319.1"; coding_status "nonCoding"; cumulative_support "FANTOM:MITRANS"; geneCategory "e_lncRNA"; DHS_type "DHS_enhancer";
hsa-mir-378i	chr22	42318854	42321522	+	gene_id "CATG00000057808.1"; geneSuperClass "all_lncRNA"; geneClass "lncRNA_divergent"; geneSubClass "divergent_promoters"; gene_type "__na"; gene_name "CATG00000057808.1"; coding_status "nonCoding"; cumulative_support "HUBDMAP"; geneCategory "__na"; DHS_type "not_DHS";
hsa-mir-5571	chr22	23161681	23358666	-	gene_id "CATG00000058284.1"; geneSuperClass "uncertain_coding"; geneClass "uncertain_coding"; geneSubClass "CPAT_coding_evidence_uncertain"; gene_type "__na"; gene_name "CATG00000058284.1"; coding_status "uncertain"; cumulative_support "ENCODE:FANTOM:MITRANS"; geneCategory "__na"; DHS_type "not_DHS";
hsa-mir-4792	chr3	24562666	24564464	+	gene_id "CATG00000059493.1"; geneSuperClass "all_lncRNA"; geneClass "lncRNA_intergenic"; geneSubClass "far_from_coding_genes"; gene_type "__na"; gene_name "CATG00000059493.1"; coding_status "nonCoding"; cumulative_support "MITRANS"; geneCategory "p_lncRNA_intergenic"; DHS_type "DHS_promoter";
hsa-mir-4442	chr3	25705768	25706417	+	gene_id "CATG00000059503.1"; geneSuperClass "all_lncRNA"; geneClass "lncRNA_divergent"; geneSubClass "convergent_promoters"; gene_type "__na"; gene_name "CATG00000059503.1"; coding_status "nonCoding"; cumulative_support "MITRANS"; geneCategory "p_lncRNA_divergent"; DHS_type "DHS_promoter";
hsa-mir-548ab	chr3	103233021	103327760	+	gene_id "CATG00000061160.1"; geneSuperClass "all_lncRNA"; geneClass "lncRNA_intergenic"; geneSubClass "far_from_coding_genes"; gene_type "__na"; gene_name "CATG00000061160.1"; coding_status "nonCoding"; cumulative_support "MITRANS"; geneCategory "__na"; DHS_type "not_DHS";
hsa-mir-3117	chr1	67093938	67101673	-	gene_id "CATG00000061473.1"; geneSuperClass "all_lncRNA"; geneClass "lncRNA_divergent"; geneSubClass "convergent_promoters"; gene_type "__na"; gene_name "CATG00000061473.1"; coding_status "nonCoding"; cumulative_support "ENCODE:MITRANS"; geneCategory "__na"; DHS_type "not_DHS";
hsa-mir-95	chr4	7987990	8008795	+	gene_id "CATG00000067667.1"; geneSuperClass "all_mRNA"; geneClass "coding_mRNA"; geneSubClass "unannotated_CPAT_coding"; gene_type "__na"; gene_name "CATG00000067667.1"; coding_status "coding"; cumulative_support "MITRANS"; geneCategory "__na"; DHS_type "DHS_enhancer";
hsa-mir-4455	chr4	185805825	185884729	+	gene_id "CATG00000071361.1"; geneSuperClass "all_lncRNA"; geneClass "lncRNA_intergenic"; geneSubClass "far_from_coding_genes"; gene_type "__na"; gene_name "CATG00000071361.1"; coding_status "nonCoding"; cumulative_support "FANTOM:HUBDMAP:MITRANS"; geneCategory "e_lncRNA"; DHS_type "DHS_enhancer";
hsa-mir-548ah	chr4	77346953	77631419	-	gene_id "CATG00000072858.1"; geneSuperClass "all_lncRNA"; geneClass "lncRNA_divergent"; geneSubClass "convergent_promoters"; gene_type "__na"; gene_name "CATG00000072858.1"; coding_status "nonCoding"; cumulative_support "FANTOM:HUBDMAP:MITRANS"; geneCategory "p_lncRNA_divergent"; DHS_type "DHS_promoter";
hsa-mir-548ae-2	chr5	57825512	57826511	+	gene_id "CATG00000076001.1"; geneSuperClass "all_lncRNA"; geneClass "lncRNA_intergenic"; geneSubClass "far_from_coding_genes"; gene_type "__na"; gene_name "CATG00000076001.1"; coding_status "nonCoding"; cumulative_support "FANTOM"; geneCategory "__na"; DHS_type "not_DHS";
hsa-mir-9-2	chr5	87962139	87967553	+	gene_id "CATG00000076590.1"; geneSuperClass "all_lncRNA"; geneClass "lncRNA_intergenic"; geneSubClass "far_from_coding_genes"; gene_type "__na"; gene_name "CATG00000076590.1"; coding_status "nonCoding"; cumulative_support "HUBDMAP:MITRANS"; geneCategory "__na"; DHS_type "DHS_dyadic";
hsa-mir-3141	chr5	153954517	153981770	+	gene_id "CATG00000078196.1"; geneSuperClass "all_lncRNA"; geneClass "lncRNA_intergenic"; geneSubClass "far_from_coding_genes"; gene_type "__na"; gene_name "CATG00000078196.1"; coding_status "nonCoding"; cumulative_support "ENCODE:MITRANS"; geneCategory "e_lncRNA"; DHS_type "DHS_enhancer";
hsa-mir-556	chr1	162294574	162321839	-	gene_id "CATG00000080506.1"; geneSuperClass "all_lncRNA"; geneClass "lncRNA_antisense"; geneSubClass "ref_within_qry"; gene_type "__na"; gene_name "CATG00000080506.1"; coding_status "nonCoding"; cumulative_support "MITRANS"; geneCategory "e_lncRNA"; DHS_type "DHS_enhancer";
hsa-mir-1303	chr5	154060076	154069009	-	gene_id "CATG00000081720.1"; geneSuperClass "all_lncRNA"; geneClass "lncRNA_intergenic"; geneSubClass "far_from_coding_genes"; gene_type "__na"; gene_name "CATG00000081720.1"; coding_status "nonCoding"; cumulative_support "MITRANS"; geneCategory "__na"; DHS_type "not_DHS";
hsa-mir-877	chr6	30442351	30726990	-	gene_id "CATG00000087985.1"; geneSuperClass "all_lncRNA"; geneClass "lncRNA_intergenic"; geneSubClass "proximal_to_coding_genes_both_strand"; gene_type "__na"; gene_name "CATG00000087985.1"; coding_status "nonCoding"; cumulative_support "FANTOM"; geneCategory "e_lncRNA"; DHS_type "DHS_enhancer";
hsa-mir-206	chr6	51994684	52066813	-	gene_id "CATG00000088510.1"; geneSuperClass "all_mRNA"; geneClass "coding_mRNA"; geneSubClass "unannotated_CPAT_coding"; gene_type "__na"; gene_name "CATG00000088510.1"; coding_status "coding"; cumulative_support "FANTOM:MITRANS"; geneCategory "__na"; DHS_type "DHS_enhancer";
hsa-mir-133b	chr6	51994684	52066813	-	gene_id "CATG00000088510.1"; geneSuperClass "all_mRNA"; geneClass "coding_mRNA"; geneSubClass "unannotated_CPAT_coding"; gene_type "__na"; gene_name "CATG00000088510.1"; coding_status "coding"; cumulative_support "FANTOM:MITRANS"; geneCategory "__na"; DHS_type "DHS_enhancer";
hsa-mir-182	chr7	129402121	129418559	+	gene_id "CATG00000093941.1"; geneSuperClass "all_lncRNA"; geneClass "lncRNA_intergenic"; geneSubClass "far_from_coding_genes"; gene_type "__na"; gene_name "CATG00000093941.1"; coding_status "nonCoding"; cumulative_support "FANTOM:HUBDMAP:MITRANS"; geneCategory "__na"; DHS_type "not_DHS";
hsa-mir-96	chr7	129402121	129418559	+	gene_id "CATG00000093941.1"; geneSuperClass "all_lncRNA"; geneClass "lncRNA_intergenic"; geneSubClass "far_from_coding_genes"; gene_type "__na"; gene_name "CATG00000093941.1"; coding_status "nonCoding"; cumulative_support "FANTOM:HUBDMAP:MITRANS"; geneCategory "__na"; DHS_type "not_DHS";
hsa-mir-183	chr7	129402121	129418559	+	gene_id "CATG00000093941.1"; geneSuperClass "all_lncRNA"; geneClass "lncRNA_intergenic"; geneSubClass "far_from_coding_genes"; gene_type "__na"; gene_name "CATG00000093941.1"; coding_status "nonCoding"; cumulative_support "FANTOM:HUBDMAP:MITRANS"; geneCategory "__na"; DHS_type "not_DHS";
hsa-mir-29b-1	chr7	130558386	130565847	+	gene_id "CATG00000093968.1"; geneSuperClass "all_lncRNA"; geneClass "lncRNA_intergenic"; geneSubClass "far_from_coding_genes"; gene_type "__na"; gene_name "CATG00000093968.1"; coding_status "nonCoding"; cumulative_support "MITRANS"; geneCategory "e_lncRNA"; DHS_type "DHS_enhancer";
hsa-mir-548a-3	chr8	105478122	105496729	+	gene_id "CATG00000100086.1"; geneSuperClass "all_lncRNA"; geneClass "lncRNA_intergenic"; geneSubClass "proximal_to_coding_genes_antisense_strand"; gene_type "__na"; gene_name "CATG00000100086.1"; coding_status "nonCoding"; cumulative_support "MITRANS"; geneCategory "p_lncRNA_intergenic"; DHS_type "DHS_promoter";
hsa-mir-4478	chr9	124877977	124889566	+	gene_id "CATG00000106989.1"; geneSuperClass "all_mRNA"; geneClass "coding_mRNA"; geneSubClass "unannotated_CPAT_coding"; gene_type "__na"; gene_name "CATG00000106989.1"; coding_status "coding"; cumulative_support "MITRANS"; geneCategory "__na"; DHS_type "DHS_enhancer";
hsa-mir-181a-2	chr9	127326874	127473465	-	gene_id "CATG00000109763.1"; geneSuperClass "all_lncRNA"; geneClass "lncRNA_sense_intronic"; geneSubClass "sense_intron_overlap"; gene_type "__na"; gene_name "CATG00000109763.1"; coding_status "nonCoding"; cumulative_support "ENCODE"; geneCategory "e_lncRNA"; DHS_type "DHS_enhancer";
hsa-mir-181b-2	chr9	127326874	127473465	-	gene_id "CATG00000109763.1"; geneSuperClass "all_lncRNA"; geneClass "lncRNA_sense_intronic"; geneSubClass "sense_intron_overlap"; gene_type "__na"; gene_name "CATG00000109763.1"; coding_status "nonCoding"; cumulative_support "ENCODE"; geneCategory "e_lncRNA"; DHS_type "DHS_enhancer";
hsa-mir-221	chrX	45570078	45630518	+	gene_id "CATG00000111084.1"; geneSuperClass "all_lncRNA"; geneClass "lncRNA_intergenic"; geneSubClass "proximal_to_coding_genes_sense_strand"; gene_type "__na"; gene_name "CATG00000111084.1"; coding_status "nonCoding"; cumulative_support "ENCODE:HUBDMAP:MITRANS"; geneCategory "e_lncRNA"; DHS_type "DHS_enhancer";
hsa-mir-222	chrX	45570078	45630518	+	gene_id "CATG00000111084.1"; geneSuperClass "all_lncRNA"; geneClass "lncRNA_intergenic"; geneSubClass "proximal_to_coding_genes_sense_strand"; gene_type "__na"; gene_name "CATG00000111084.1"; coding_status "nonCoding"; cumulative_support "ENCODE:HUBDMAP:MITRANS"; geneCategory "e_lncRNA"; DHS_type "DHS_enhancer";
hsa-mir-548i-4	chrX	83463692	83506128	+	gene_id "CATG00000111762.1"; geneSuperClass "all_lncRNA"; geneClass "lncRNA_intergenic"; geneSubClass "far_from_coding_genes"; gene_type "__na"; gene_name "CATG00000111762.1"; coding_status "nonCoding"; cumulative_support "MITRANS"; geneCategory "__na"; DHS_type "not_DHS";
hsa-mir-513c	chrX	145936085	146353682	+	gene_id "CATG00000112709.1"; geneSuperClass "uncertain_coding"; geneClass "uncertain_coding"; geneSubClass "CPAT_coding_evidence_uncertain"; gene_type "__na"; gene_name "CATG00000112709.1"; coding_status "uncertain"; cumulative_support "ENCODE:FANTOM:MITRANS"; geneCategory "__na"; DHS_type "DHS_promoter";
hsa-mir-513b	chrX	145936085	146353682	+	gene_id "CATG00000112709.1"; geneSuperClass "uncertain_coding"; geneClass "uncertain_coding"; geneSubClass "CPAT_coding_evidence_uncertain"; gene_type "__na"; gene_name "CATG00000112709.1"; coding_status "uncertain"; cumulative_support "ENCODE:FANTOM:MITRANS"; geneCategory "__na"; DHS_type "DHS_promoter";
hsa-mir-506	chrX	145936085	146353682	+	gene_id "CATG00000112709.1"; geneSuperClass "uncertain_coding"; geneClass "uncertain_coding"; geneSubClass "CPAT_coding_evidence_uncertain"; gene_type "__na"; gene_name "CATG00000112709.1"; coding_status "uncertain"; cumulative_support "ENCODE:FANTOM:MITRANS"; geneCategory "__na"; DHS_type "DHS_promoter";
hsa-mir-507	chrX	145936085	146353682	+	gene_id "CATG00000112709.1"; geneSuperClass "uncertain_coding"; geneClass "uncertain_coding"; geneSubClass "CPAT_coding_evidence_uncertain"; gene_type "__na"; gene_name "CATG00000112709.1"; coding_status "uncertain"; cumulative_support "ENCODE:FANTOM:MITRANS"; geneCategory "__na"; DHS_type "DHS_promoter";
hsa-mir-508	chrX	145936085	146353682	+	gene_id "CATG00000112709.1"; geneSuperClass "uncertain_coding"; geneClass "uncertain_coding"; geneSubClass "CPAT_coding_evidence_uncertain"; gene_type "__na"; gene_name "CATG00000112709.1"; coding_status "uncertain"; cumulative_support "ENCODE:FANTOM:MITRANS"; geneCategory "__na"; DHS_type "DHS_promoter";
hsa-mir-514b	chrX	145936085	146353682	+	gene_id "CATG00000112709.1"; geneSuperClass "uncertain_coding"; geneClass "uncertain_coding"; geneSubClass "CPAT_coding_evidence_uncertain"; gene_type "__na"; gene_name "CATG00000112709.1"; coding_status "uncertain"; cumulative_support "ENCODE:FANTOM:MITRANS"; geneCategory "__na"; DHS_type "DHS_promoter";
hsa-mir-513c	chrX	146267144	146277584	+	gene_id "CATG00000112721.1"; geneSuperClass "other_RNA"; geneClass "sense_overlap_RNA"; geneSubClass "__na"; gene_type "__na"; gene_name "CATG00000112721.1"; coding_status "nonCoding"; cumulative_support "ENCODE:FANTOM"; geneCategory "__na"; DHS_type "not_DHS";
hsa-mir-508	chrX	146313967	146319564	+	gene_id "CATG00000112723.1"; geneSuperClass "other_RNA"; geneClass "sense_overlap_RNA"; geneSubClass "__na"; gene_type "__na"; gene_name "CATG00000112723.1"; coding_status "nonCoding"; cumulative_support "FANTOM:HUBDMAP"; geneCategory "__na"; DHS_type "not_DHS";
hsa-mir-514b	chrX	146320826	146341041	+	gene_id "CATG00000112724.1"; geneSuperClass "all_lncRNA"; geneClass "lncRNA_sense_intronic"; geneSubClass "sense_intron_overlap"; gene_type "__na"; gene_name "CATG00000112724.1"; coding_status "nonCoding"; cumulative_support "FANTOM:HUBDMAP"; geneCategory "__na"; DHS_type "not_DHS";
hsa-mir-510	chrX	146353566	146354816	+	gene_id "CATG00000112725.1"; geneSuperClass "all_lncRNA"; geneClass "lncRNA_intergenic"; geneSubClass "far_from_coding_genes"; gene_type "__na"; gene_name "CATG00000112725.1"; coding_status "nonCoding"; cumulative_support "FANTOM"; geneCategory "__na"; DHS_type "not_DHS";
hsa-mir-224	chrX	151124879	151127061	+	gene_id "CATG00000112804.1"; geneSuperClass "all_lncRNA"; geneClass "lncRNA_divergent"; geneSubClass "divergent_promoters"; gene_type "__na"; gene_name "CATG00000112804.1"; coding_status "nonCoding"; cumulative_support "HUBDMAP"; geneCategory "__na"; DHS_type "not_DHS";
hsa-mir-107	chr10	91294074	91352865	+	gene_id "CATG00000115944.1"; geneSuperClass "all_lncRNA"; geneClass "lncRNA_divergent"; geneSubClass "convergent_promoters"; gene_type "__na"; gene_name "CATG00000115944.1"; coding_status "nonCoding"; cumulative_support "FANTOM:HUBDMAP:MITRANS"; geneCategory "__na"; DHS_type "DHS_dyadic";
hsa-mir-3663	chr10	118925224	118936828	+	gene_id "CATG00000116535.1"; geneSuperClass "all_lncRNA"; geneClass "lncRNA_intergenic"; geneSubClass "far_from_coding_genes"; gene_type "__na"; gene_name "CATG00000116535.1"; coding_status "nonCoding"; cumulative_support "ENCODE:MITRANS"; geneCategory "p_lncRNA_intergenic"; DHS_type "DHS_promoter";
hsa-mir-202	chr10	135059587	135061586	+	gene_id "CATG00000116965.1"; geneSuperClass "all_mRNA"; geneClass "coding_mRNA"; geneSubClass "unannotated_CPAT_coding"; gene_type "__na"; gene_name "CATG00000116965.1"; coding_status "coding"; cumulative_support "HUBDMAP"; geneCategory "__na"; DHS_type "DHS_enhancer";
hsa-mir-1254-1	chr10	70513799	70520619	-	gene_id "CATG00000118432.1"; geneSuperClass "all_lncRNA"; geneClass "lncRNA_divergent"; geneSubClass "divergent_promoters"; gene_type "__na"; gene_name "CATG00000118432.1"; coding_status "nonCoding"; cumulative_support "MITRANS"; geneCategory "__na"; DHS_type "not_DHS";
hsa-mir-1269b	chr17	12692694	12897294	+	gene_id "ENSG00000006740.12"; geneSuperClass "all_mRNA"; geneClass "coding_mRNA"; geneSubClass "protein_coding"; gene_type "protein_coding"; gene_name "ARHGAP44"; coding_status "coding"; cumulative_support "FANTOM:GENCODE:HUBDMAP"; geneCategory "coding_mRNA"; DHS_type "DHS_promoter";
hsa-mir-1295a	chr1	171060046	171086980	+	gene_id "ENSG00000007933.8"; geneSuperClass "all_mRNA"; geneClass "coding_mRNA"; geneSubClass "protein_coding"; gene_type "protein_coding"; gene_name "FMO3"; coding_status "coding"; cumulative_support "FANTOM:GENCODE:HUBDMAP:MITRANS"; geneCategory "__na"; DHS_type "not_DHS";
hsa-mir-600	chr9	125693950	125894664	+	gene_id "ENSG00000011454.12"; geneSuperClass "all_mRNA"; geneClass "coding_mRNA"; geneSubClass "protein_coding"; gene_type "protein_coding"; gene_name "RABGAP1"; coding_status "coding"; cumulative_support "ENCODE:FANTOM:GENCODE:HUBDMAP:MITRANS"; geneCategory "coding_mRNA"; DHS_type "DHS_promoter";
hsa-mir-6088	chr19	45910484	45982120	-	gene_id "ENSG00000012061.11"; geneSuperClass "all_mRNA"; geneClass "coding_mRNA"; geneSubClass "protein_coding"; gene_type "protein_coding"; gene_name "ERCC1"; coding_status "coding"; cumulative_support "ENCODE:FANTOM:GENCODE:HUBDMAP:MITRANS"; geneCategory "coding_mRNA"; DHS_type "DHS_promoter";
hsa-mir-4708	chr14	65754397	66257186	+	gene_id "ENSG00000033170.12"; geneSuperClass "all_mRNA"; geneClass "coding_mRNA"; geneSubClass "protein_coding"; gene_type "protein_coding"; gene_name "FUT8"; coding_status "coding"; cumulative_support "ENCODE:FANTOM:GENCODE:HUBDMAP:MITRANS"; geneCategory "coding_mRNA"; DHS_type "DHS_promoter";
hsa-mir-548h-2	chr16	10960063	11463046	+	gene_id "ENSG00000038532.10"; geneSuperClass "all_mRNA"; geneClass "coding_mRNA"; geneSubClass "protein_coding"; gene_type "protein_coding"; gene_name "CLEC16A"; coding_status "coding"; cumulative_support "ENCODE:FANTOM:GENCODE:HUBDMAP:MITRANS"; geneCategory "coding_mRNA"; DHS_type "DHS_promoter";
hsa-mir-1271	chr5	175794371	175819581	-	gene_id "ENSG00000048162.15"; geneSuperClass "all_mRNA"; geneClass "coding_mRNA"; geneSubClass "protein_coding"; gene_type "protein_coding"; gene_name "NOP16"; coding_status "coding"; cumulative_support "ENCODE:FANTOM:GENCODE:HUBDMAP:MITRANS"; geneCategory "coding_mRNA"; DHS_type "DHS_promoter";
hsa-mir-548h-1	chr14	64319346	64703067	+	gene_id "ENSG00000054654.11"; geneSuperClass "all_mRNA"; geneClass "coding_mRNA"; geneSubClass "protein_coding"; gene_type "protein_coding"; gene_name "SYNE2"; coding_status "coding"; cumulative_support "ENCODE:FANTOM:GENCODE:HUBDMAP:MITRANS"; geneCategory "coding_mRNA"; DHS_type "DHS_promoter";
hsa-mir-548ak	chr10	12164817	12406270	+	gene_id "ENSG00000065665.16"; geneSuperClass "all_mRNA"; geneClass "coding_mRNA"; geneSubClass "protein_coding"; gene_type "protein_coding"; gene_name "SEC61A2"; coding_status "coding"; cumulative_support "ENCODE:FANTOM:GENCODE:HUBDMAP:MITRANS"; geneCategory "coding_mRNA"; DHS_type "DHS_promoter";
hsa-mir-215	chr1	220267474	220332075	+	gene_id "ENSG00000067704.8"; geneSuperClass "all_mRNA"; geneClass "coding_mRNA"; geneSubClass "protein_coding"; gene_type "protein_coding"; gene_name "IARS2"; coding_status "coding"; cumulative_support "ENCODE:FANTOM:GENCODE"; geneCategory "coding_mRNA"; DHS_type "DHS_promoter";
hsa-mir-194-1	chr1	220267474	220332075	+	gene_id "ENSG00000067704.8"; geneSuperClass "all_mRNA"; geneClass "coding_mRNA"; geneSubClass "protein_coding"; gene_type "protein_coding"; gene_name "IARS2"; coding_status "coding"; cumulative_support "ENCODE:FANTOM:GENCODE"; geneCategory "coding_mRNA"; DHS_type "DHS_promoter";
hsa-mir-4531	chr19	45147210	45170798	+	gene_id "ENSG00000073008.10"; geneSuperClass "all_mRNA"; geneClass "coding_mRNA"; geneSubClass "protein_coding"; gene_type "protein_coding"; gene_name "PVR"; coding_status "coding"; cumulative_support "ENCODE:FANTOM:GENCODE"; geneCategory "coding_mRNA"; DHS_type "DHS_promoter";
hsa-mir-199a-1	chr19	10828755	10944164	+	gene_id "ENSG00000079805.12"; geneSuperClass "all_mRNA"; geneClass "coding_mRNA"; geneSubClass "protein_coding"; gene_type "protein_coding"; gene_name "DNM2"; coding_status "coding"; cumulative_support "ENCODE:FANTOM:GENCODE:HUBDMAP"; geneCategory "coding_mRNA"; DHS_type "DHS_promoter";
hsa-mir-499a	chr20	33263112	33872831	-	gene_id "ENSG00000088298.8"; geneSuperClass "all_mRNA"; geneClass "coding_mRNA"; geneSubClass "protein_coding"; gene_type "protein_coding"; gene_name "EDEM2"; coding_status "coding"; cumulative_support "ENCODE:FANTOM:GENCODE:HUBDMAP"; geneCategory "coding_mRNA"; DHS_type "DHS_promoter";
hsa-mir-5684	chr19	12866566	12984241	-	gene_id "ENSG00000095066.7"; geneSuperClass "all_mRNA"; geneClass "coding_mRNA"; geneSubClass "protein_coding"; gene_type "protein_coding"; gene_name "HOOK2"; coding_status "coding"; cumulative_support "ENCODE:FANTOM:GENCODE:HUBDMAP:MITRANS"; geneCategory "coding_mRNA"; DHS_type "DHS_promoter";
hsa-mir-659	chr22	38093055	38320658	+	gene_id "ENSG00000100106.15"; geneSuperClass "all_mRNA"; geneClass "coding_mRNA"; geneSubClass "protein_coding"; gene_type "protein_coding"; gene_name "TRIOBP"; coding_status "coding"; cumulative_support "ENCODE:FANTOM:GENCODE:HUBDMAP:MITRANS"; geneCategory "coding_mRNA"; DHS_type "DHS_promoter";
hsa-mir-33a	chr22	42165681	42343127	-	gene_id "ENSG00000100162.10"; geneSuperClass "all_mRNA"; geneClass "coding_mRNA"; geneSubClass "protein_coding"; gene_type "protein_coding"; gene_name "CENPM"; coding_status "coding"; cumulative_support "ENCODE:FANTOM:GENCODE:HUBDMAP"; geneCategory "coding_mRNA"; DHS_type "DHS_promoter";
hsa-mir-499a	chr20	33575315	33681236	-	gene_id "ENSG00000100991.7"; geneSuperClass "all_mRNA"; geneClass "coding_mRNA"; geneSubClass "protein_coding"; gene_type "protein_coding"; gene_name "TRPC4AP"; coding_status "coding"; cumulative_support "ENCODE:FANTOM:GENCODE:HUBDMAP:MITRANS"; geneCategory "coding_mRNA"; DHS_type "DHS_promoter";
hsa-mir-103a-2	chr20	3887322	3999179	-	gene_id "ENSG00000101236.12"; geneSuperClass "all_mRNA"; geneClass "coding_mRNA"; geneSubClass "protein_coding"; gene_type "protein_coding"; gene_name "RNF24"; coding_status "coding"; cumulative_support "ENCODE:FANTOM:GENCODE:MITRANS"; geneCategory "coding_mRNA"; DHS_type "DHS_promoter";
hsa-mir-133a-1	chr18	19283626	19453441	+	gene_id "ENSG00000101752.7"; geneSuperClass "all_mRNA"; geneClass "coding_mRNA"; geneSubClass "protein_coding"; gene_type "protein_coding"; gene_name "MIB1"; coding_status "coding"; cumulative_support "ENCODE:FANTOM:GENCODE:HUBDMAP"; geneCategory "coding_mRNA"; DHS_type "DHS_promoter";
hsa-mir-1-2	chr18	19283626	19453441	+	gene_id "ENSG00000101752.7"; geneSuperClass "all_mRNA"; geneClass "coding_mRNA"; geneSubClass "protein_coding"; gene_type "protein_coding"; gene_name "MIB1"; coding_status "coding"; cumulative_support "ENCODE:FANTOM:GENCODE:HUBDMAP"; geneCategory "coding_mRNA"; DHS_type "DHS_promoter";
hsa-mir-328	chr16	67233034	67238978	+	gene_id "ENSG00000102890.10"; geneSuperClass "all_mRNA"; geneClass "coding_mRNA"; geneSubClass "protein_coding"; gene_type "protein_coding"; gene_name "ELMO3"; coding_status "coding"; cumulative_support "FANTOM:GENCODE"; geneCategory "coding_mRNA"; DHS_type "DHS_promoter";
hsa-mir-549a	chr15	81071712	81439469	+	gene_id "ENSG00000103888.11"; geneSuperClass "all_mRNA"; geneClass "coding_mRNA"; geneSubClass "protein_coding"; gene_type "protein_coding"; gene_name "KIAA1199"; coding_status "coding"; cumulative_support "ENCODE:FANTOM:GENCODE:HUBDMAP:MITRANS"; geneCategory "coding_mRNA"; DHS_type "DHS_promoter";
hsa-mir-4750	chr19	50385654	50432732	-	gene_id "ENSG00000104951.11"; geneSuperClass "all_mRNA"; geneClass "coding_mRNA"; geneSubClass "protein_coding"; gene_type "protein_coding"; gene_name "IL4I1"; coding_status "coding"; cumulative_support "ENCODE:FANTOM:GENCODE:HUBDMAP:MITRANS"; geneCategory "coding_mRNA"; DHS_type "DHS_promoter";
hsa-mir-3190	chr19	47720899	47736117	-	gene_id "ENSG00000105327.11"; geneSuperClass "all_mRNA"; geneClass "coding_mRNA"; geneSubClass "protein_coding"; gene_type "protein_coding"; gene_name "BBC3"; coding_status "coding"; cumulative_support "ENCODE:FANTOM:GENCODE:HUBDMAP:MITRANS"; geneCategory "__na"; DHS_type "DHS_dyadic";
hsa-mir-4284	chr7	73113126	73133999	-	gene_id "ENSG00000106089.7"; geneSuperClass "all_mRNA"; geneClass "coding_mRNA"; geneSubClass "protein_coding"; gene_type "protein_coding"; gene_name "STX1A"; coding_status "coding"; cumulative_support "ENCODE:FANTOM:GENCODE:HUBDMAP:MITRANS"; geneCategory "__na"; DHS_type "DHS_dyadic";
hsa-mir-199b	chr9	130953930	131018297	+	gene_id "ENSG00000106976.14"; geneSuperClass "all_mRNA"; geneClass "coding_mRNA"; geneSubClass "protein_coding"; gene_type "protein_coding"; gene_name "DNM1"; coding_status "coding"; cumulative_support "ENCODE:FANTOM:GENCODE:HUBDMAP:MITRANS"; geneCategory "coding_mRNA"; DHS_type "DHS_promoter";
hsa-mir-3154	chr9	130953930	131018297	+	gene_id "ENSG00000106976.14"; geneSuperClass "all_mRNA"; geneClass "coding_mRNA"; geneSubClass "protein_coding"; gene_type "protein_coding"; gene_name "DNM1"; coding_status "coding"; cumulative_support "ENCODE:FANTOM:GENCODE:HUBDMAP:MITRANS"; geneCategory "coding_mRNA"; DHS_type "DHS_promoter";
hsa-mir-21	chr17	57871752	57970276	-	gene_id "ENSG00000108423.10"; geneSuperClass "all_mRNA"; geneClass "coding_mRNA"; geneSubClass "protein_coding"; gene_type "protein_coding"; gene_name "TUBD1"; coding_status "coding"; cumulative_support "ENCODE:FANTOM:GENCODE:HUBDMAP"; geneCategory "coding_mRNA"; DHS_type "DHS_promoter";
hsa-mir-632	chr17	30651762	30678911	-	gene_id "ENSG00000108666.5"; geneSuperClass "all_mRNA"; geneClass "coding_mRNA"; geneSubClass "protein_coding"; gene_type "protein_coding"; gene_name "C17orf75"; coding_status "coding"; cumulative_support "ENCODE:FANTOM:GENCODE:HUBDMAP:MITRANS"; geneCategory "coding_mRNA"; DHS_type "DHS_promoter";
hsa-mir-195	chr17	6898112	6921076	+	gene_id "ENSG00000108839.7"; geneSuperClass "all_mRNA"; geneClass "coding_mRNA"; geneSubClass "protein_coding"; gene_type "protein_coding"; gene_name "ALOX12"; coding_status "coding"; cumulative_support "ENCODE:FANTOM:GENCODE:HUBDMAP:MITRANS"; geneCategory "coding_mRNA"; DHS_type "DHS_promoter";
hsa-mir-6503	chr11	59953272	60085782	+	gene_id "ENSG00000110079.12"; geneSuperClass "all_mRNA"; geneClass "coding_mRNA"; geneSubClass "protein_coding"; gene_type "protein_coding"; gene_name "MS4A4A"; coding_status "coding"; cumulative_support "ENCODE:FANTOM:GENCODE:HUBDMAP"; geneCategory "__na"; DHS_type "DHS_enhancer";
hsa-mir-34c	chr11	111210654	111412181	-	gene_id "ENSG00000110777.7"; geneSuperClass "all_mRNA"; geneClass "coding_mRNA"; geneSubClass "protein_coding"; gene_type "protein_coding"; gene_name "POU2AF1"; coding_status "coding"; cumulative_support "ENCODE:FANTOM:GENCODE:HUBDMAP:MITRANS"; geneCategory "__na"; DHS_type "DHS_enhancer";
hsa-mir-548a-2	chr6	135277502	135608576	-	gene_id "ENSG00000112339.10"; geneSuperClass "all_mRNA"; geneClass "coding_mRNA"; geneSubClass "protein_coding"; gene_type "protein_coding"; gene_name "HBS1L"; coding_status "coding"; cumulative_support "ENCODE:FANTOM:GENCODE:HUBDMAP:MITRANS"; geneCategory "coding_mRNA"; DHS_type "DHS_promoter";
hsa-mir-135a-1	chr3	52325647	52443692	+	gene_id "ENSG00000114841.13"; geneSuperClass "all_mRNA"; geneClass "coding_mRNA"; geneSubClass "protein_coding"; gene_type "protein_coding"; gene_name "DNAH1"; coding_status "coding"; cumulative_support "ENCODE:FANTOM:GENCODE:HUBDMAP:MITRANS"; geneCategory "__na"; DHS_type "DHS_dyadic";
hsa-mir-29c	chr1	207918926	207986979	+	gene_id "ENSG00000117335.14"; geneSuperClass "all_mRNA"; geneClass "coding_mRNA"; geneSubClass "protein_coding"; gene_type "protein_coding"; gene_name "CD46"; coding_status "uncertain"; cumulative_support "ENCODE:FANTOM:GENCODE:HUBDMAP:MITRANS"; geneCategory "coding_mRNA"; DHS_type "DHS_promoter";
hsa-mir-29b-2	chr1	207918926	207986979	+	gene_id "ENSG00000117335.14"; geneSuperClass "all_mRNA"; geneClass "coding_mRNA"; geneSubClass "protein_coding"; gene_type "protein_coding"; gene_name "CD46"; coding_status "uncertain"; cumulative_support "ENCODE:FANTOM:GENCODE:HUBDMAP:MITRANS"; geneCategory "coding_mRNA"; DHS_type "DHS_promoter";
hsa-mir-26a-2	chr12	58159518	58219458	+	gene_id "ENSG00000123427.11"; geneSuperClass "all_mRNA"; geneClass "coding_mRNA"; geneSubClass "protein_coding"; gene_type "protein_coding"; gene_name "METTL21B"; coding_status "uncertain"; cumulative_support "ENCODE:FANTOM:GENCODE:HUBDMAP"; geneCategory "coding_mRNA"; DHS_type "DHS_promoter";
hsa-mir-6499	chr5	150794482	150982176	+	gene_id "ENSG00000123643.8"; geneSuperClass "all_mRNA"; geneClass "coding_mRNA"; geneSubClass "protein_coding"; gene_type "protein_coding"; gene_name "SLC36A1"; coding_status "coding"; cumulative_support "ENCODE:FANTOM:GENCODE:HUBDMAP:MITRANS"; geneCategory "coding_mRNA"; DHS_type "DHS_promoter";
hsa-mir-143	chr5	148749600	148812396	-	gene_id "ENSG00000127743.5"; geneSuperClass "all_mRNA"; geneClass "coding_mRNA"; geneSubClass "protein_coding"; gene_type "protein_coding"; gene_name "IL17B"; coding_status "coding"; cumulative_support "ENCODE:FANTOM:GENCODE:HUBDMAP:MITRANS"; geneCategory "__na"; DHS_type "DHS_dyadic";
hsa-mir-145	chr5	148749600	148812396	-	gene_id "ENSG00000127743.5"; geneSuperClass "all_mRNA"; geneClass "coding_mRNA"; geneSubClass "protein_coding"; gene_type "protein_coding"; gene_name "IL17B"; coding_status "coding"; cumulative_support "ENCODE:FANTOM:GENCODE:HUBDMAP:MITRANS"; geneCategory "__na"; DHS_type "DHS_dyadic";
hsa-mir-4298	chr11	1870465	1959939	+	gene_id "ENSG00000130592.9"; geneSuperClass "all_mRNA"; geneClass "coding_mRNA"; geneSubClass "protein_coding"; gene_type "protein_coding"; gene_name "LSP1"; coding_status "coding"; cumulative_support "ENCODE:FANTOM:GENCODE:HUBDMAP:MITRANS"; geneCategory "coding_mRNA"; DHS_type "DHS_promoter";
hsa-mir-1910	chr16	85202817	85956193	+	gene_id "ENSG00000131149.13"; geneSuperClass "all_mRNA"; geneClass "coding_mRNA"; geneSubClass "protein_coding"; gene_type "protein_coding"; gene_name "GSE1"; coding_status "coding"; cumulative_support "ENCODE:FANTOM:GENCODE:HUBDMAP:MITRANS"; geneCategory "__na"; DHS_type "DHS_dyadic";
hsa-mir-24-2	chr19	13906257	13953720	+	gene_id "ENSG00000132003.5"; geneSuperClass "all_mRNA"; geneClass "coding_mRNA"; geneSubClass "protein_coding"; gene_type "protein_coding"; gene_name "ZSWIM4"; coding_status "coding"; cumulative_support "ENCODE:FANTOM:GENCODE:HUBDMAP:MITRANS"; geneCategory "coding_mRNA"; DHS_type "DHS_promoter";
hsa-mir-27a	chr19	13906257	13953720	+	gene_id "ENSG00000132003.5"; geneSuperClass "all_mRNA"; geneClass "coding_mRNA"; geneSubClass "protein_coding"; gene_type "protein_coding"; gene_name "ZSWIM4"; coding_status "coding"; cumulative_support "ENCODE:FANTOM:GENCODE:HUBDMAP:MITRANS"; geneCategory "coding_mRNA"; DHS_type "DHS_promoter";
hsa-mir-4738	chr17	73779408	73824233	+	gene_id "ENSG00000132478.5"; geneSuperClass "all_mRNA"; geneClass "coding_mRNA"; geneSubClass "protein_coding"; gene_type "protein_coding"; gene_name "UNK"; coding_status "coding"; cumulative_support "ENCODE:FANTOM:GENCODE:HUBDMAP:MITRANS"; geneCategory "__na"; DHS_type "DHS_dyadic";
hsa-mir-599	chr8	100025019	100891279	+	gene_id "ENSG00000132549.14"; geneSuperClass "all_mRNA"; geneClass "coding_mRNA"; geneSubClass "protein_coding"; gene_type "protein_coding"; gene_name "VPS13B"; coding_status "coding"; cumulative_support "ENCODE:FANTOM:GENCODE:HUBDMAP:MITRANS"; geneCategory "coding_mRNA"; DHS_type "DHS_promoter";
hsa-mir-4279	chr5	31639248	32113169	+	gene_id "ENSG00000133401.11"; geneSuperClass "all_mRNA"; geneClass "coding_mRNA"; geneSubClass "protein_coding"; gene_type "protein_coding"; gene_name "PDZD2"; coding_status "coding"; cumulative_support "ENCODE:FANTOM:GENCODE:HUBDMAP:MITRANS"; geneCategory "coding_mRNA"; DHS_type "DHS_promoter";
hsa-mir-885	chr3	10031277	10452488	+	gene_id "ENSG00000134070.4"; geneSuperClass "all_mRNA"; geneClass "coding_mRNA"; geneSubClass "protein_coding"; gene_type "protein_coding"; gene_name "IRAK2"; coding_status "coding"; cumulative_support "ENCODE:FANTOM:GENCODE:HUBDMAP:MITRANS"; geneCategory "coding_mRNA"; DHS_type "DHS_promoter";
hsa-mir-5001	chr2	233411040	233449857	+	gene_id "ENSG00000135930.9"; geneSuperClass "all_mRNA"; geneClass "coding_mRNA"; geneSubClass "protein_coding"; gene_type "protein_coding"; gene_name "EIF4E2"; coding_status "coding"; cumulative_support "FANTOM:GENCODE:HUBDMAP"; geneCategory "coding_mRNA"; DHS_type "DHS_promoter";
hsa-mir-3911	chr9	130341429	130460942	+	gene_id "ENSG00000136854.13"; geneSuperClass "all_mRNA"; geneClass "coding_mRNA"; geneSubClass "protein_coding"; gene_type "protein_coding"; gene_name "STXBP1"; coding_status "coding"; cumulative_support "ENCODE:FANTOM:GENCODE:HUBDMAP:MITRANS"; geneCategory "coding_mRNA"; DHS_type "DHS_promoter";
hsa-mir-6720	chr6	1388313	1399337	+	gene_id "ENSG00000137273.3"; geneSuperClass "all_mRNA"; geneClass "coding_mRNA"; geneSubClass "protein_coding"; gene_type "protein_coding"; gene_name "FOXF2"; coding_status "uncertain"; cumulative_support "ENCODE:FANTOM:GENCODE:HUBDMAP:MITRANS"; geneCategory "coding_mRNA"; DHS_type "DHS_promoter";
hsa-mir-3934	chr6	33662007	33679709	-	gene_id "ENSG00000137288.5"; geneSuperClass "all_mRNA"; geneClass "coding_mRNA"; geneSubClass "protein_coding"; gene_type "protein_coding"; gene_name "UQCC2"; coding_status "coding"; cumulative_support "ENCODE:FANTOM:GENCODE:HUBDMAP:MITRANS"; geneCategory "coding_mRNA"; DHS_type "DHS_promoter";
hsa-mir-34c	chr11	111338251	111402548	-	gene_id "ENSG00000137707.9"; geneSuperClass "all_mRNA"; geneClass "coding_mRNA"; geneSubClass "protein_coding"; gene_type "protein_coding"; gene_name "BTG4"; coding_status "coding"; cumulative_support "ENCODE:FANTOM:GENCODE:HUBDMAP:MITRANS"; geneCategory "coding_mRNA"; DHS_type "DHS_promoter";
hsa-mir-760	chr1	94015492	94320983	-	gene_id "ENSG00000137936.12"; geneSuperClass "all_mRNA"; geneClass "coding_mRNA"; geneSubClass "protein_coding"; gene_type "protein_coding"; gene_name "BCAR3"; coding_status "coding"; cumulative_support "ENCODE:FANTOM:GENCODE:HUBDMAP:MITRANS"; geneCategory "coding_mRNA"; DHS_type "DHS_promoter";
hsa-mir-320c-2	chr18	21720593	21978599	-	gene_id "ENSG00000141447.12"; geneSuperClass "all_mRNA"; geneClass "coding_mRNA"; geneSubClass "protein_coding"; gene_type "protein_coding"; gene_name "OSBPL1A"; coding_status "coding"; cumulative_support "ENCODE:FANTOM:GENCODE:HUBDMAP"; geneCategory "coding_mRNA"; DHS_type "DHS_promoter";
hsa-mir-373	chr19	54291656	54327568	-	gene_id "ENSG00000142405.17"; geneSuperClass "all_mRNA"; geneClass "coding_mRNA"; geneSubClass "protein_coding"; gene_type "protein_coding"; gene_name "NLRP12"; coding_status "coding"; cumulative_support "ENCODE:FANTOM:GENCODE:HUBDMAP:MITRANS"; geneCategory "__na"; DHS_type "DHS_enhancer";
hsa-mir-548aj-2	chrX	37764904	37990029	+	gene_id "ENSG00000147041.7"; geneSuperClass "all_mRNA"; geneClass "coding_mRNA"; geneSubClass "protein_coding"; gene_type "protein_coding"; gene_name "SYTL5"; coding_status "coding"; cumulative_support "ENCODE:FANTOM:GENCODE:HUBDMAP:MITRANS"; geneCategory "coding_mRNA"; DHS_type "DHS_promoter";
hsa-mir-181a-2	chr9	127272803	127540247	-	gene_id "ENSG00000148200.12"; geneSuperClass "all_mRNA"; geneClass "coding_mRNA"; geneSubClass "protein_coding"; gene_type "protein_coding"; gene_name "NR6A1"; coding_status "coding"; cumulative_support "ENCODE:FANTOM:GENCODE:HUBDMAP:MITRANS"; geneCategory "coding_mRNA"; DHS_type "DHS_promoter";
hsa-mir-181b-2	chr9	127272803	127540247	-	gene_id "ENSG00000148200.12"; geneSuperClass "all_mRNA"; geneClass "coding_mRNA"; geneSubClass "protein_coding"; gene_type "protein_coding"; gene_name "NR6A1"; coding_status "coding"; cumulative_support "ENCODE:FANTOM:GENCODE:HUBDMAP:MITRANS"; geneCategory "coding_mRNA"; DHS_type "DHS_promoter";
hsa-mir-155	chr21	26930780	26992809	-	gene_id "ENSG00000154719.9"; geneSuperClass "all_mRNA"; geneClass "coding_mRNA"; geneSubClass "protein_coding"; gene_type "protein_coding"; gene_name "MRPL39"; coding_status "coding"; cumulative_support "ENCODE:FANTOM:GENCODE:HUBDMAP"; geneCategory "coding_mRNA"; DHS_type "DHS_promoter";
hsa-mir-223	chrX	65235101	65259922	-	gene_id "ENSG00000155659.10"; geneSuperClass "all_mRNA"; geneClass "coding_mRNA"; geneSubClass "protein_coding"; gene_type "protein_coding"; gene_name "VSIG4"; coding_status "coding"; cumulative_support "ENCODE:FANTOM:GENCODE:HUBDMAP:MITRANS"; geneCategory "__na"; DHS_type "DHS_dyadic";
hsa-mir-3150b	chr8	95906967	96130819	+	gene_id "ENSG00000156170.8"; geneSuperClass "all_mRNA"; geneClass "coding_mRNA"; geneSubClass "protein_coding"; gene_type "protein_coding"; gene_name "NDUFAF6"; coding_status "uncertain"; cumulative_support "ENCODE:FANTOM:GENCODE:HUBDMAP:MITRANS"; geneCategory "coding_mRNA"; DHS_type "DHS_promoter";
hsa-mir-4716	chr15	49447991	49660564	+	gene_id "ENSG00000156958.10"; geneSuperClass "all_mRNA"; geneClass "coding_mRNA"; geneSubClass "protein_coding"; gene_type "protein_coding"; gene_name "GALK2"; coding_status "coding"; cumulative_support "ENCODE:FANTOM:GENCODE:HUBDMAP:MITRANS"; geneCategory "coding_mRNA"; DHS_type "DHS_promoter";
hsa-mir-378b	chr3	10361822	10749703	-	gene_id "ENSG00000157087.12"; geneSuperClass "all_mRNA"; geneClass "coding_mRNA"; geneSubClass "protein_coding"; gene_type "protein_coding"; gene_name "ATP2B2"; coding_status "coding"; cumulative_support "ENCODE:FANTOM:GENCODE:HUBDMAP:MITRANS"; geneCategory "coding_mRNA"; DHS_type "DHS_promoter";
hsa-mir-27b	chr9	97847756	98079991	-	gene_id "ENSG00000158169.7"; geneSuperClass "all_mRNA"; geneClass "coding_mRNA"; geneSubClass "protein_coding"; gene_type "protein_coding"; gene_name "FANCC"; coding_status "coding"; cumulative_support "ENCODE:FANTOM:GENCODE:HUBDMAP"; geneCategory "coding_mRNA"; DHS_type "DHS_promoter";
hsa-mir-335	chr7	130134890	130353577	-	gene_id "ENSG00000158623.10"; geneSuperClass "all_mRNA"; geneClass "coding_mRNA"; geneSubClass "protein_coding"; gene_type "protein_coding"; gene_name "COPG2"; coding_status "coding"; cumulative_support "ENCODE:FANTOM:GENCODE:HUBDMAP:MITRANS"; geneCategory "coding_mRNA"; DHS_type "DHS_promoter";
hsa-mir-5187	chr1	161189039	161197014	-	gene_id "ENSG00000158874.7"; geneSuperClass "all_mRNA"; geneClass "coding_mRNA"; geneSubClass "protein_coding"; gene_type "protein_coding"; gene_name "APOA2"; coding_status "coding"; cumulative_support "FANTOM:GENCODE:MITRANS"; geneCategory "__na"; DHS_type "not_DHS";
hsa-mir-320e	chr19	47103942	47215684	+	gene_id "ENSG00000160014.12"; geneSuperClass "all_mRNA"; geneClass "coding_mRNA"; geneSubClass "protein_coding"; gene_type "protein_coding"; gene_name "CALM3"; coding_status "coding"; cumulative_support "ENCODE:FANTOM:GENCODE:HUBDMAP:MITRANS"; geneCategory "coding_mRNA"; DHS_type "DHS_promoter";
hsa-mir-340	chr5	179233017	179474550	+	gene_id "ENSG00000161011.15"; geneSuperClass "all_mRNA"; geneClass "coding_mRNA"; geneSubClass "protein_coding"; gene_type "protein_coding"; gene_name "SQSTM1"; coding_status "coding"; cumulative_support "ENCODE:FANTOM:GENCODE:HUBDMAP:MITRANS"; geneCategory "__na"; DHS_type "DHS_dyadic";
hsa-mir-195	chr17	6908588	6921076	+	gene_id "ENSG00000161939.14"; geneSuperClass "all_mRNA"; geneClass "coding_mRNA"; geneSubClass "protein_coding"; gene_type "protein_coding"; gene_name "RNASEK-C17orf49"; coding_status "coding"; cumulative_support "ENCODE:FANTOM:GENCODE:HUBDMAP:MITRANS"; geneCategory "coding_mRNA"; DHS_type "DHS_promoter";
hsa-mir-378d-2	chr8	94870016	94946441	+	gene_id "ENSG00000164951.11"; geneSuperClass "all_mRNA"; geneClass "coding_mRNA"; geneSubClass "protein_coding"; gene_type "protein_coding"; gene_name "PDP1"; coding_status "coding"; cumulative_support "ENCODE:FANTOM:GENCODE:HUBDMAP:MITRANS"; geneCategory "coding_mRNA"; DHS_type "DHS_promoter";
hsa-mir-1260a	chr14	77731744	77737549	-	gene_id "ENSG00000165553.4"; geneSuperClass "all_mRNA"; geneClass "coding_mRNA"; geneSubClass "protein_coding"; gene_type "protein_coding"; gene_name "NGB"; coding_status "coding"; cumulative_support "FANTOM:GENCODE:HUBDMAP"; geneCategory "coding_mRNA"; DHS_type "DHS_promoter";
hsa-mir-130a	chr11	57403902	57417385	-	gene_id "ENSG00000166793.6"; geneSuperClass "all_mRNA"; geneClass "coding_mRNA"; geneSubClass "protein_coding"; gene_type "protein_coding"; gene_name "YPEL4"; coding_status "coding"; cumulative_support "ENCODE:FANTOM:GENCODE:MITRANS"; geneCategory "__na"; DHS_type "DHS_dyadic";
hsa-mir-616	chr12	57869264	57914447	+	gene_id "ENSG00000166986.8"; geneSuperClass "all_mRNA"; geneClass "coding_mRNA"; geneSubClass "protein_coding"; gene_type "protein_coding"; gene_name "MARS"; coding_status "coding"; cumulative_support "ENCODE:FANTOM:GENCODE:HUBDMAP:MITRANS"; geneCategory "coding_mRNA"; DHS_type "DHS_promoter";
hsa-mir-22	chr17	1613758	1642207	+	gene_id "ENSG00000167716.14"; geneSuperClass "all_mRNA"; geneClass "coding_mRNA"; geneSubClass "protein_coding"; gene_type "protein_coding"; gene_name "WDR81"; coding_status "coding"; cumulative_support "ENCODE:FANTOM:GENCODE:HUBDMAP"; geneCategory "coding_mRNA"; DHS_type "DHS_promoter";
hsa-mir-5684	chr19	12894176	12912694	-	gene_id "ENSG00000167815.7"; geneSuperClass "all_mRNA"; geneClass "coding_mRNA"; geneSubClass "protein_coding"; gene_type "protein_coding"; gene_name "PRDX2"; coding_status "uncertain"; cumulative_support "ENCODE:FANTOM:GENCODE:HUBDMAP:MITRANS"; geneCategory "coding_mRNA"; DHS_type "DHS_promoter";
hsa-mir-135a-1	chr3	52312774	52349951	+	gene_id "ENSG00000168237.13"; geneSuperClass "all_mRNA"; geneClass "coding_mRNA"; geneSubClass "protein_coding"; gene_type "protein_coding"; gene_name "GLYCTK"; coding_status "coding"; cumulative_support "ENCODE:FANTOM:GENCODE:HUBDMAP:MITRANS"; geneCategory "coding_mRNA"; DHS_type "DHS_promoter";
hsa-mir-320a	chr8	22089402	22119798	+	gene_id "ENSG00000168495.8"; geneSuperClass "all_mRNA"; geneClass "coding_mRNA"; geneSubClass "protein_coding"; gene_type "protein_coding"; gene_name "POLR3D"; coding_status "coding"; cumulative_support "ENCODE:FANTOM:GENCODE:HUBDMAP:MITRANS"; geneCategory "coding_mRNA"; DHS_type "DHS_promoter";
hsa-mir-126	chr9	139564182	139581894	-	gene_id "ENSG00000169692.8"; geneSuperClass "all_mRNA"; geneClass "coding_mRNA"; geneSubClass "protein_coding"; gene_type "protein_coding"; gene_name "AGPAT2"; coding_status "coding"; cumulative_support "ENCODE:FANTOM:GENCODE:MITRANS"; geneCategory "coding_mRNA"; DHS_type "DHS_promoter";
hsa-mir-378h	chr5	154190079	154239069	-	gene_id "ENSG00000170271.6"; geneSuperClass "all_mRNA"; geneClass "coding_mRNA"; geneSubClass "protein_coding"; gene_type "protein_coding"; gene_name "FAXDC2"; coding_status "coding"; cumulative_support "ENCODE:FANTOM:GENCODE:MITRANS"; geneCategory "coding_mRNA"; DHS_type "DHS_promoter";
hsa-mir-1276	chr15	85923598	86513374	+	gene_id "ENSG00000170776.15"; geneSuperClass "all_mRNA"; geneClass "coding_mRNA"; geneSubClass "protein_coding"; gene_type "protein_coding"; gene_name "AKAP13"; coding_status "coding"; cumulative_support "ENCODE:FANTOM:GENCODE:HUBDMAP:MITRANS"; geneCategory "coding_mRNA"; DHS_type "DHS_promoter";
hsa-mir-574	chr4	38797964	38869972	-	gene_id "ENSG00000174130.8"; geneSuperClass "all_mRNA"; geneClass "coding_mRNA"; geneSubClass "protein_coding"; gene_type "protein_coding"; gene_name "TLR6"; coding_status "coding"; cumulative_support "ENCODE:FANTOM:GENCODE:HUBDMAP:MITRANS"; geneCategory "coding_mRNA"; DHS_type "DHS_promoter";
hsa-mir-1-1	chr20	61141436	61151617	-	gene_id "ENSG00000174403.11"; geneSuperClass "all_lncRNA"; geneClass "lncRNA_divergent"; geneSubClass "divergent_promoters"; gene_type "antisense"; gene_name "C20orf166-AS1"; coding_status "uncertain"; cumulative_support "ENCODE:FANTOM:GENCODE:HUBDMAP:MITRANS"; geneCategory "p_lncRNA_divergent"; DHS_type "DHS_promoter";
hsa-mir-302d	chr4	113558327	113580874	+	gene_id "ENSG00000174720.11"; geneSuperClass "all_mRNA"; geneClass "coding_mRNA"; geneSubClass "protein_coding"; gene_type "protein_coding"; gene_name "LARP7"; coding_status "coding"; cumulative_support "ENCODE:FANTOM:GENCODE:HUBDMAP:MITRANS"; geneCategory "coding_mRNA"; DHS_type "DHS_promoter";
hsa-mir-302a	chr4	113558327	113580874	+	gene_id "ENSG00000174720.11"; geneSuperClass "all_mRNA"; geneClass "coding_mRNA"; geneSubClass "protein_coding"; gene_type "protein_coding"; gene_name "LARP7"; coding_status "coding"; cumulative_support "ENCODE:FANTOM:GENCODE:HUBDMAP:MITRANS"; geneCategory "coding_mRNA"; DHS_type "DHS_promoter";
hsa-mir-302c	chr4	113558327	113580874	+	gene_id "ENSG00000174720.11"; geneSuperClass "all_mRNA"; geneClass "coding_mRNA"; geneSubClass "protein_coding"; gene_type "protein_coding"; gene_name "LARP7"; coding_status "coding"; cumulative_support "ENCODE:FANTOM:GENCODE:HUBDMAP:MITRANS"; geneCategory "coding_mRNA"; DHS_type "DHS_promoter";
hsa-mir-302b	chr4	113558327	113580874	+	gene_id "ENSG00000174720.11"; geneSuperClass "all_mRNA"; geneClass "coding_mRNA"; geneSubClass "protein_coding"; gene_type "protein_coding"; gene_name "LARP7"; coding_status "coding"; cumulative_support "ENCODE:FANTOM:GENCODE:HUBDMAP:MITRANS"; geneCategory "coding_mRNA"; DHS_type "DHS_promoter";
hsa-mir-548h-2	chr16	11343484	11493201	+	gene_id "ENSG00000175643.7"; geneSuperClass "all_mRNA"; geneClass "coding_mRNA"; geneSubClass "protein_coding"; gene_type "protein_coding"; gene_name "RMI2"; coding_status "uncertain"; cumulative_support "ENCODE:FANTOM:GENCODE:HUBDMAP:MITRANS"; geneCategory "coding_mRNA"; DHS_type "DHS_promoter";
hsa-mir-425	chr3	49055240	49071220	+	gene_id "ENSG00000178057.10"; geneSuperClass "all_mRNA"; geneClass "coding_mRNA"; geneSubClass "protein_coding"; gene_type "protein_coding"; gene_name "NDUFAF3"; coding_status "coding"; cumulative_support "FANTOM:GENCODE:HUBDMAP:MITRANS"; geneCategory "coding_mRNA"; DHS_type "DHS_promoter";
hsa-mir-191	chr3	49055240	49071220	+	gene_id "ENSG00000178057.10"; geneSuperClass "all_mRNA"; geneClass "coding_mRNA"; geneSubClass "protein_coding"; gene_type "protein_coding"; gene_name "NDUFAF3"; coding_status "coding"; cumulative_support "FANTOM:GENCODE:HUBDMAP:MITRANS"; geneCategory "coding_mRNA"; DHS_type "DHS_promoter";
hsa-mir-425	chr3	49044832	49057991	+	gene_id "ENSG00000178252.13"; geneSuperClass "all_mRNA"; geneClass "coding_mRNA"; geneSubClass "protein_coding"; gene_type "protein_coding"; gene_name "WDR6"; coding_status "coding"; cumulative_support "ENCODE:FANTOM:GENCODE:HUBDMAP:MITRANS"; geneCategory "coding_mRNA"; DHS_type "DHS_promoter";
hsa-mir-4521	chr17	8076112	8127310	-	gene_id "ENSG00000178977.3"; geneSuperClass "all_lncRNA"; geneClass "lncRNA_intergenic"; geneSubClass "far_from_coding_genes"; gene_type "lincRNA"; gene_name "LINC00324"; coding_status "uncertain"; cumulative_support "ENCODE:FANTOM:GENCODE:HUBDMAP"; geneCategory "p_lncRNA_intergenic"; DHS_type "DHS_promoter";
hsa-mir-3123	chr1	240930951	241520478	-	gene_id "ENSG00000182901.11"; geneSuperClass "all_mRNA"; geneClass "coding_mRNA"; geneSubClass "protein_coding"; gene_type "protein_coding"; gene_name "RGS7"; coding_status "coding"; cumulative_support "ENCODE:FANTOM:GENCODE:HUBDMAP:MITRANS"; geneCategory "coding_mRNA"; DHS_type "DHS_promoter";
hsa-mir-548q	chr10	12391083	12878715	+	gene_id "ENSG00000183049.8"; geneSuperClass "all_mRNA"; geneClass "coding_mRNA"; geneSubClass "protein_coding"; gene_type "protein_coding"; gene_name "CAMK1D"; coding_status "coding"; cumulative_support "ENCODE:FANTOM:GENCODE:HUBDMAP:MITRANS"; geneCategory "coding_mRNA"; DHS_type "DHS_promoter";
hsa-mir-4286	chr8	10461029	10539238	-	gene_id "ENSG00000183638.5"; geneSuperClass "all_mRNA"; geneClass "coding_mRNA"; geneSubClass "protein_coding"; gene_type "protein_coding"; gene_name "RP1L1"; coding_status "coding"; cumulative_support "ENCODE:FANTOM:GENCODE:HUBDMAP:MITRANS"; geneCategory "__na"; DHS_type "DHS_enhancer";
hsa-mir-4791	chr3	19188594	19583454	+	gene_id "ENSG00000183960.4"; geneSuperClass "all_mRNA"; geneClass "coding_mRNA"; geneSubClass "protein_coding"; gene_type "protein_coding"; gene_name "KCNH8"; coding_status "coding"; cumulative_support "ENCODE:FANTOM:GENCODE:HUBDMAP:MITRANS"; geneCategory "coding_mRNA"; DHS_type "DHS_promoter";
hsa-mir-5193	chr3	49836829	49847758	+	gene_id "ENSG00000185614.4"; geneSuperClass "all_mRNA"; geneClass "coding_mRNA"; geneSubClass "protein_coding"; gene_type "protein_coding"; gene_name "FAM212A"; coding_status "coding"; cumulative_support "ENCODE:FANTOM:GENCODE:HUBDMAP:MITRANS"; geneCategory "coding_mRNA"; DHS_type "DHS_promoter";
hsa-mir-4271	chr3	49306219	49315383	-	gene_id "ENSG00000188315.3"; geneSuperClass "all_mRNA"; geneClass "coding_mRNA"; geneSubClass "protein_coding"; gene_type "protein_coding"; gene_name "C3orf62"; coding_status "coding"; cumulative_support "FANTOM:GENCODE"; geneCategory "__na"; DHS_type "DHS_dyadic";
hsa-mir-4484	chr10	127469828	127511851	-	gene_id "ENSG00000188690.8"; geneSuperClass "all_mRNA"; geneClass "coding_mRNA"; geneSubClass "protein_coding"; gene_type "protein_coding"; gene_name "UROS"; coding_status "coding"; cumulative_support "ENCODE:FANTOM:GENCODE:HUBDMAP:MITRANS"; geneCategory "coding_mRNA"; DHS_type "DHS_promoter";
hsa-mir-378f	chr1	24196805	24285553	-	gene_id "ENSG00000188822.6"; geneSuperClass "all_mRNA"; geneClass "coding_mRNA"; geneSubClass "protein_coding"; gene_type "protein_coding"; gene_name "CNR2"; coding_status "coding"; cumulative_support "ENCODE:FANTOM:GENCODE:HUBDMAP:MITRANS"; geneCategory "__na"; DHS_type "DHS_enhancer";
hsa-mir-4429	chr2	11605797	11787089	+	gene_id "ENSG00000196208.9"; geneSuperClass "all_mRNA"; geneClass "coding_mRNA"; geneSubClass "protein_coding"; gene_type "protein_coding"; gene_name "GREB1"; coding_status "coding"; cumulative_support "ENCODE:FANTOM:GENCODE:HUBDMAP:MITRANS"; geneCategory "__na"; DHS_type "not_DHS";
hsa-mir-151b	chr14	100437759	100616562	+	gene_id "ENSG00000196405.8"; geneSuperClass "all_mRNA"; geneClass "coding_mRNA"; geneSubClass "protein_coding"; gene_type "protein_coding"; gene_name "EVL"; coding_status "coding"; cumulative_support "ENCODE:FANTOM:GENCODE:HUBDMAP:MITRANS"; geneCategory "__na"; DHS_type "DHS_dyadic";
hsa-mir-4521	chr17	8084337	8093483	-	gene_id "ENSG00000196544.6"; geneSuperClass "all_mRNA"; geneClass "coding_mRNA"; geneSubClass "protein_coding"; gene_type "protein_coding"; gene_name "C17orf59"; coding_status "coding"; cumulative_support "ENCODE:FANTOM:GENCODE:HUBDMAP"; geneCategory "coding_mRNA"; DHS_type "DHS_promoter";
hsa-mir-214	chr1	171787065	172387606	+	gene_id "ENSG00000197959.9"; geneSuperClass "all_mRNA"; geneClass "coding_mRNA"; geneSubClass "protein_coding"; gene_type "protein_coding"; gene_name "DNM3"; coding_status "coding"; cumulative_support "ENCODE:FANTOM:GENCODE:HUBDMAP:MITRANS"; geneCategory "coding_mRNA"; DHS_type "DHS_promoter";
hsa-mir-199a-2	chr1	171787065	172387606	+	gene_id "ENSG00000197959.9"; geneSuperClass "all_mRNA"; geneClass "coding_mRNA"; geneSubClass "protein_coding"; gene_type "protein_coding"; gene_name "DNM3"; coding_status "coding"; cumulative_support "ENCODE:FANTOM:GENCODE:HUBDMAP:MITRANS"; geneCategory "coding_mRNA"; DHS_type "DHS_promoter";
hsa-mir-6125	chr12	62101043	62708701	-	gene_id "ENSG00000198673.6"; geneSuperClass "all_mRNA"; geneClass "coding_mRNA"; geneSubClass "protein_coding"; gene_type "protein_coding"; gene_name "FAM19A2"; coding_status "nonCoding"; cumulative_support "ENCODE:FANTOM:GENCODE:HUBDMAP:MITRANS"; geneCategory "coding_mRNA"; DHS_type "DHS_promoter";
hsa-mir-21	chr17	57895119	57929069	-	gene_id "ENSG00000201524.1"; geneSuperClass "short_RNA"; geneClass "small_RNA"; geneSubClass "snRNA"; gene_type "snRNA"; gene_name "RNU6-450P"; coding_status "nonCoding"; cumulative_support "ENCODE:FANTOM:GENCODE:MITRANS"; geneCategory "__na"; DHS_type "DHS_promoter";
hsa-mir-219a-1	chr6	33161258	33180489	-	gene_id "ENSG00000204231.6"; geneSuperClass "all_mRNA"; geneClass "coding_mRNA"; geneSubClass "protein_coding"; gene_type "protein_coding"; gene_name "RXRB"; coding_status "coding"; cumulative_support "ENCODE:FANTOM:GENCODE:HUBDMAP:MITRANS"; geneCategory "coding_mRNA"; DHS_type "DHS_promoter";
hsa-mir-3652	chr12	104235534	104324404	-	gene_id "ENSG00000214198.3"; geneSuperClass "all_pseudogene"; geneClass "pseudogene"; geneSubClass "pseudogene"; gene_type "pseudogene"; gene_name "RP11-642P15.1"; coding_status "coding"; cumulative_support "ENCODE:FANTOM:GENCODE:HUBDMAP:MITRANS"; geneCategory "__na"; DHS_type "DHS_promoter";
hsa-mir-3616	chr20	45766729	45804322	-	gene_id "ENSG00000215450.2"; geneSuperClass "all_pseudogene"; geneClass "pseudogene"; geneSubClass "pseudogene"; gene_type "pseudogene"; gene_name "RP5-890O15.3"; coding_status "nonCoding"; cumulative_support "GENCODE:MITRANS"; geneCategory "__na"; DHS_type "DHS_enhancer";
hsa-mir-486	chr8	41512665	41518026	+	gene_id "ENSG00000221035.1"; geneSuperClass "short_RNA"; geneClass "small_RNA"; geneSubClass "miRNA"; gene_type "miRNA"; gene_name "MIR486"; coding_status "nonCoding"; cumulative_support "FANTOM:GENCODE"; geneCategory "__na"; DHS_type "DHS_dyadic";
hsa-let-7i	chr12	62991330	63008028	-	gene_id "ENSG00000221949.2"; geneSuperClass "all_mRNA"; geneClass "coding_mRNA"; geneSubClass "protein_coding"; gene_type "protein_coding"; gene_name "C12orf61"; coding_status "coding"; cumulative_support "ENCODE:FANTOM:GENCODE:MITRANS"; geneCategory "coding_mRNA"; DHS_type "DHS_promoter";
hsa-mir-1246	chr2	177293888	177690269	+	gene_id "ENSG00000224577.1"; geneSuperClass "all_lncRNA"; geneClass "lncRNA_intergenic"; geneSubClass "far_from_coding_genes"; gene_type "lincRNA"; gene_name "AC017048.4"; coding_status "uncertain"; cumulative_support "ENCODE:FANTOM:GENCODE:HUBDMAP:MITRANS"; geneCategory "p_lncRNA_intergenic"; DHS_type "DHS_promoter";
hsa-mir-135b	chr1	205402724	205440340	+	gene_id "ENSG00000224717.1"; geneSuperClass "all_lncRNA"; geneClass "lncRNA_divergent"; geneSubClass "convergent_promoters"; gene_type "lincRNA"; gene_name "RP11-576D8.4"; coding_status "uncertain"; cumulative_support "FANTOM:GENCODE:HUBDMAP:MITRANS"; geneCategory "__na"; DHS_type "DHS_dyadic";
hsa-mir-3605	chr1	33771927	33802262	+	gene_id "ENSG00000225313.2"; geneSuperClass "all_lncRNA"; geneClass "lncRNA_antisense"; geneSubClass "head_to_head"; gene_type "antisense"; gene_name "RP11-415J8.3"; coding_status "uncertain"; cumulative_support "FANTOM:GENCODE:HUBDMAP:MITRANS"; geneCategory "__na"; DHS_type "not_DHS";
hsa-mir-503	chrX	133678460	133695701	+	gene_id "ENSG00000227060.2"; geneSuperClass "all_lncRNA"; geneClass "lncRNA_intergenic"; geneSubClass "far_from_coding_genes"; gene_type "lincRNA"; gene_name "LINC00629"; coding_status "nonCoding"; cumulative_support "ENCODE:FANTOM:GENCODE:HUBDMAP:MITRANS"; geneCategory "p_lncRNA_intergenic"; DHS_type "DHS_promoter";
hsa-mir-424	chrX	133678460	133695701	+	gene_id "ENSG00000227060.2"; geneSuperClass "all_lncRNA"; geneClass "lncRNA_intergenic"; geneSubClass "far_from_coding_genes"; gene_type "lincRNA"; gene_name "LINC00629"; coding_status "nonCoding"; cumulative_support "ENCODE:FANTOM:GENCODE:HUBDMAP:MITRANS"; geneCategory "p_lncRNA_intergenic"; DHS_type "DHS_promoter";
hsa-mir-548aj-1	chr6	132426862	132518618	+	gene_id "ENSG00000228495.1"; geneSuperClass "all_lncRNA"; geneClass "lncRNA_intergenic"; geneSubClass "far_from_coding_genes"; gene_type "lincRNA"; gene_name "LINC01013"; coding_status "nonCoding"; cumulative_support "ENCODE:FANTOM:GENCODE:HUBDMAP:MITRANS"; geneCategory "e_lncRNA"; DHS_type "DHS_enhancer";
hsa-mir-5100	chr10	43467255	43521828	-	gene_id "ENSG00000229630.1"; geneSuperClass "all_lncRNA"; geneClass "lncRNA_intergenic"; geneSubClass "far_from_coding_genes"; gene_type "lincRNA"; gene_name "RP11-124O11.2"; coding_status "uncertain"; cumulative_support "ENCODE:GENCODE:MITRANS"; geneCategory "__na"; DHS_type "DHS_dyadic";
hsa-let-7a-1	chr9	96926935	96966822	-	gene_id "ENSG00000230262.2"; geneSuperClass "all_lncRNA"; geneClass "lncRNA_intergenic"; geneSubClass "far_from_coding_genes"; gene_type "lincRNA"; gene_name "MIRLET7DHG"; coding_status "nonCoding"; cumulative_support "FANTOM:GENCODE:HUBDMAP:MITRANS"; geneCategory "p_lncRNA_intergenic"; DHS_type "DHS_promoter";
hsa-let-7f-1	chr9	96926935	96966822	-	gene_id "ENSG00000230262.2"; geneSuperClass "all_lncRNA"; geneClass "lncRNA_intergenic"; geneSubClass "far_from_coding_genes"; gene_type "lincRNA"; gene_name "MIRLET7DHG"; coding_status "nonCoding"; cumulative_support "FANTOM:GENCODE:HUBDMAP:MITRANS"; geneCategory "p_lncRNA_intergenic"; DHS_type "DHS_promoter";
hsa-let-7d	chr9	96926935	96966822	-	gene_id "ENSG00000230262.2"; geneSuperClass "all_lncRNA"; geneClass "lncRNA_intergenic"; geneSubClass "far_from_coding_genes"; gene_type "lincRNA"; gene_name "MIRLET7DHG"; coding_status "nonCoding"; cumulative_support "FANTOM:GENCODE:HUBDMAP:MITRANS"; geneCategory "p_lncRNA_intergenic"; DHS_type "DHS_promoter";
hsa-mir-154	chr14	101524390	101544247	-	gene_id "ENSG00000230805.2"; geneSuperClass "all_lncRNA"; geneClass "lncRNA_intergenic"; geneSubClass "far_from_coding_genes"; gene_type "lincRNA"; gene_name "AL132709.1"; coding_status "uncertain"; cumulative_support "ENCODE:FANTOM:GENCODE:HUBDMAP:MITRANS"; geneCategory "p_lncRNA_intergenic"; DHS_type "DHS_promoter";
hsa-mir-496	chr14	101524390	101544247	-	gene_id "ENSG00000230805.2"; geneSuperClass "all_lncRNA"; geneClass "lncRNA_intergenic"; geneSubClass "far_from_coding_genes"; gene_type "lincRNA"; gene_name "AL132709.1"; coding_status "uncertain"; cumulative_support "ENCODE:FANTOM:GENCODE:HUBDMAP:MITRANS"; geneCategory "p_lncRNA_intergenic"; DHS_type "DHS_promoter";
hsa-mir-377	chr14	101524390	101544247	-	gene_id "ENSG00000230805.2"; geneSuperClass "all_lncRNA"; geneClass "lncRNA_intergenic"; geneSubClass "far_from_coding_genes"; gene_type "lincRNA"; gene_name "AL132709.1"; coding_status "uncertain"; cumulative_support "ENCODE:FANTOM:GENCODE:HUBDMAP:MITRANS"; geneCategory "p_lncRNA_intergenic"; DHS_type "DHS_promoter";
hsa-mir-541	chr14	101524390	101544247	-	gene_id "ENSG00000230805.2"; geneSuperClass "all_lncRNA"; geneClass "lncRNA_intergenic"; geneSubClass "far_from_coding_genes"; gene_type "lincRNA"; gene_name "AL132709.1"; coding_status "uncertain"; cumulative_support "ENCODE:FANTOM:GENCODE:HUBDMAP:MITRANS"; geneCategory "p_lncRNA_intergenic"; DHS_type "DHS_promoter";
hsa-mir-409	chr14	101524390	101544247	-	gene_id "ENSG00000230805.2"; geneSuperClass "all_lncRNA"; geneClass "lncRNA_intergenic"; geneSubClass "far_from_coding_genes"; gene_type "lincRNA"; gene_name "AL132709.1"; coding_status "uncertain"; cumulative_support "ENCODE:FANTOM:GENCODE:HUBDMAP:MITRANS"; geneCategory "p_lncRNA_intergenic"; DHS_type "DHS_promoter";
hsa-mir-412	chr14	101524390	101544247	-	gene_id "ENSG00000230805.2"; geneSuperClass "all_lncRNA"; geneClass "lncRNA_intergenic"; geneSubClass "far_from_coding_genes"; gene_type "lincRNA"; gene_name "AL132709.1"; coding_status "uncertain"; cumulative_support "ENCODE:FANTOM:GENCODE:HUBDMAP:MITRANS"; geneCategory "p_lncRNA_intergenic"; DHS_type "DHS_promoter";
hsa-mir-369	chr14	101524390	101544247	-	gene_id "ENSG00000230805.2"; geneSuperClass "all_lncRNA"; geneClass "lncRNA_intergenic"; geneSubClass "far_from_coding_genes"; gene_type "lincRNA"; gene_name "AL132709.1"; coding_status "uncertain"; cumulative_support "ENCODE:FANTOM:GENCODE:HUBDMAP:MITRANS"; geneCategory "p_lncRNA_intergenic"; DHS_type "DHS_promoter";
hsa-mir-410	chr14	101524390	101544247	-	gene_id "ENSG00000230805.2"; geneSuperClass "all_lncRNA"; geneClass "lncRNA_intergenic"; geneSubClass "far_from_coding_genes"; gene_type "lincRNA"; gene_name "AL132709.1"; coding_status "uncertain"; cumulative_support "ENCODE:FANTOM:GENCODE:HUBDMAP:MITRANS"; geneCategory "p_lncRNA_intergenic"; DHS_type "DHS_promoter";
hsa-mir-656	chr14	101524390	101544247	-	gene_id "ENSG00000230805.2"; geneSuperClass "all_lncRNA"; geneClass "lncRNA_intergenic"; geneSubClass "far_from_coding_genes"; gene_type "lincRNA"; gene_name "AL132709.1"; coding_status "uncertain"; cumulative_support "ENCODE:FANTOM:GENCODE:HUBDMAP:MITRANS"; geneCategory "p_lncRNA_intergenic"; DHS_type "DHS_promoter";
hsa-mir-1262	chr1	68297907	68668670	+	gene_id "ENSG00000232284.3"; geneSuperClass "all_lncRNA"; geneClass "lncRNA_divergent"; geneSubClass "divergent_promoters"; gene_type "antisense"; gene_name "GNG12-AS1"; coding_status "nonCoding"; cumulative_support "ENCODE:FANTOM:GENCODE:HUBDMAP:MITRANS"; geneCategory "p_lncRNA_divergent"; DHS_type "DHS_promoter";
hsa-mir-218-2	chr5	168006752	168280941	+	gene_id "ENSG00000233913.6"; geneSuperClass "all_pseudogene"; geneClass "pseudogene"; geneSubClass "pseudogene"; gene_type "pseudogene"; gene_name "CTC-575D19.1"; coding_status "coding"; cumulative_support "ENCODE:FANTOM:GENCODE:HUBDMAP:MITRANS"; geneCategory "__na"; DHS_type "not_DHS";
hsa-mir-490	chr7	136370306	136849275	-	gene_id "ENSG00000234352.5"; geneSuperClass "all_lncRNA"; geneClass "lncRNA_divergent"; geneSubClass "convergent_promoters"; gene_type "antisense"; gene_name "hsa-mir-490"; coding_status "uncertain"; cumulative_support "FANTOM:GENCODE:HUBDMAP"; geneCategory "__na"; DHS_type "not_DHS";
hsa-mir-33a	chr22	42295231	42339653	-	gene_id "ENSG00000234965.1"; geneSuperClass "all_mRNA"; geneClass "coding_mRNA"; geneSubClass "protein_coding"; gene_type "protein_coding"; gene_name "SHISA8"; coding_status "coding"; cumulative_support "ENCODE:FANTOM:GENCODE:HUBDMAP:MITRANS"; geneCategory "coding_mRNA"; DHS_type "DHS_promoter";
hsa-mir-3907	chr7	151120569	151136943	+	gene_id "ENSG00000241456.1"; geneSuperClass "all_lncRNA"; geneClass "lncRNA_antisense"; geneSubClass "tail_to_tail"; gene_type "antisense"; gene_name "RP4-555L14.4"; coding_status "uncertain"; cumulative_support "ENCODE:FANTOM:GENCODE:HUBDMAP:MITRANS"; geneCategory "e_lncRNA"; DHS_type "DHS_enhancer";
hsa-mir-544b	chr3	124449397	124456590	-	gene_id "ENSG00000242199.1"; geneSuperClass "all_pseudogene"; geneClass "pseudogene"; geneSubClass "pseudogene"; gene_type "pseudogene"; gene_name "RP11-71H17.1"; coding_status "uncertain"; cumulative_support "GENCODE:MITRANS"; geneCategory "__na"; DHS_type "not_DHS";
hsa-mir-196a-1	chr17	46689604	46712293	+	gene_id "ENSG00000242207.1"; geneSuperClass "all_lncRNA"; geneClass "lncRNA_antisense"; geneSubClass "head_to_head"; gene_type "antisense"; gene_name "HOXB-AS4"; coding_status "uncertain"; cumulative_support "ENCODE:GENCODE:MITRANS"; geneCategory "__na"; DHS_type "DHS_promoter";
hsa-mir-1294	chr5	153708047	153826201	-	gene_id "ENSG00000245275.3"; geneSuperClass "all_lncRNA"; geneClass "lncRNA_divergent"; geneSubClass "divergent_promoters"; gene_type "antisense"; gene_name "SAP30L-AS1"; coding_status "uncertain"; cumulative_support "ENCODE:FANTOM:GENCODE:HUBDMAP:MITRANS"; geneCategory "p_lncRNA_divergent"; DHS_type "DHS_promoter";
hsa-mir-15b	chr3	159945241	160167548	-	gene_id "ENSG00000248710.1"; geneSuperClass "all_mRNA"; geneClass "coding_mRNA"; geneSubClass "protein_coding"; gene_type "protein_coding"; gene_name "RP11-432B6.3"; coding_status "coding"; cumulative_support "ENCODE:FANTOM:GENCODE"; geneCategory "coding_mRNA"; DHS_type "DHS_promoter";
hsa-mir-1179	chr15	89124921	89152640	-	gene_id "ENSG00000249487.2"; geneSuperClass "all_lncRNA"; geneClass "lncRNA_divergent"; geneSubClass "convergent_promoters"; gene_type "lincRNA"; gene_name "RP11-97O12.2"; coding_status "nonCoding"; cumulative_support "GENCODE:HUBDMAP:MITRANS"; geneCategory "p_lncRNA_divergent"; DHS_type "DHS_promoter";
hsa-mir-196a-2	chr12	54385618	54394482	-	gene_id "ENSG00000250133.2"; geneSuperClass "all_lncRNA"; geneClass "lncRNA_divergent"; geneSubClass "divergent_promoters"; gene_type "antisense"; gene_name "HOXC-AS2"; coding_status "uncertain"; cumulative_support "FANTOM:GENCODE:HUBDMAP:MITRANS"; geneCategory "p_lncRNA_divergent"; DHS_type "DHS_promoter";
hsa-mir-548aj-2	chrX	37208617	38546928	+	gene_id "ENSG00000250349.3"; geneSuperClass "all_mRNA"; geneClass "coding_mRNA"; geneSubClass "protein_coding"; gene_type "protein_coding"; gene_name "TM4SF2"; coding_status "coding"; cumulative_support "GENCODE:HUBDMAP"; geneCategory "coding_mRNA"; DHS_type "DHS_promoter";
hsa-mir-196a-2	chr12	54385618	54394482	-	gene_id "ENSG00000250451.1"; geneSuperClass "all_lncRNA"; geneClass "lncRNA_divergent"; geneSubClass "divergent_promoters"; gene_type "antisense"; gene_name "HOXC-AS1"; coding_status "uncertain"; cumulative_support "GENCODE:HUBDMAP:MITRANS"; geneCategory "p_lncRNA_divergent"; DHS_type "DHS_promoter";
hsa-mir-486	chr8	41512770	41523091	+	gene_id "ENSG00000253389.2"; geneSuperClass "all_lncRNA"; geneClass "lncRNA_divergent"; geneSubClass "convergent_promoters"; gene_type "antisense"; gene_name "RP11-930P14.1"; coding_status "nonCoding"; cumulative_support "FANTOM:GENCODE:MITRANS"; geneCategory "__na"; DHS_type "DHS_dyadic";
hsa-mir-431	chr14	101346992	101350685	-	gene_id "ENSG00000254656.1"; geneSuperClass "all_mRNA"; geneClass "coding_mRNA"; geneSubClass "protein_coding"; gene_type "protein_coding"; gene_name "RTL1"; coding_status "coding"; cumulative_support "FANTOM:GENCODE"; geneCategory "__na"; DHS_type "DHS_enhancer";
hsa-mir-433	chr14	101346992	101350685	-	gene_id "ENSG00000254656.1"; geneSuperClass "all_mRNA"; geneClass "coding_mRNA"; geneSubClass "protein_coding"; gene_type "protein_coding"; gene_name "RTL1"; coding_status "coding"; cumulative_support "FANTOM:GENCODE"; geneCategory "__na"; DHS_type "DHS_enhancer";
hsa-mir-127	chr14	101346992	101350685	-	gene_id "ENSG00000254656.1"; geneSuperClass "all_mRNA"; geneClass "coding_mRNA"; geneSubClass "protein_coding"; gene_type "protein_coding"; gene_name "RTL1"; coding_status "coding"; cumulative_support "FANTOM:GENCODE"; geneCategory "__na"; DHS_type "DHS_enhancer";
hsa-mir-34c	chr11	111383559	111397491	-	gene_id "ENSG00000254980.1"; geneSuperClass "all_lncRNA"; geneClass "lncRNA_divergent"; geneSubClass "divergent_promoters"; gene_type "antisense"; gene_name "RP11-794P6.6"; coding_status "nonCoding"; cumulative_support "GENCODE:HUBDMAP:MITRANS"; geneCategory "p_lncRNA_divergent"; DHS_type "DHS_promoter";
hsa-mir-4662a	chr8	125832736	125869757	-	gene_id "ENSG00000255080.1"; geneSuperClass "all_lncRNA"; geneClass "lncRNA_intergenic"; geneSubClass "far_from_coding_genes"; gene_type "lincRNA"; gene_name "RP11-1082L8.3"; coding_status "uncertain"; cumulative_support "ENCODE:FANTOM:GENCODE:MITRANS"; geneCategory "e_lncRNA"; DHS_type "DHS_enhancer";
hsa-mir-4487	chr11	47401203	47430741	-	gene_id "ENSG00000255197.1"; geneSuperClass "all_lncRNA"; geneClass "lncRNA_intergenic"; geneSubClass "proximal_to_coding_genes_antisense_strand"; gene_type "antisense"; gene_name "RP11-750H9.5"; coding_status "nonCoding"; cumulative_support "FANTOM:GENCODE"; geneCategory "__na"; DHS_type "DHS_dyadic";
hsa-mir-195	chr17	6917472	6920968	+	gene_id "ENSG00000258315.1"; geneSuperClass "all_mRNA"; geneClass "coding_mRNA"; geneSubClass "protein_coding"; gene_type "protein_coding"; gene_name "C17orf49"; coding_status "coding"; cumulative_support "FANTOM:GENCODE:HUBDMAP"; geneCategory "coding_mRNA"; DHS_type "DHS_promoter";
hsa-mir-208b	chr14	23871736	23891973	+	gene_id "ENSG00000258444.1"; geneSuperClass "all_lncRNA"; geneClass "lncRNA_divergent"; geneSubClass "convergent_promoters"; gene_type "antisense"; gene_name "CTD-2201G16.1"; coding_status "uncertain"; cumulative_support "GENCODE:HUBDMAP:MITRANS"; geneCategory "__na"; DHS_type "not_DHS";
hsa-mir-4708	chr14	65727785	65845106	+	gene_id "ENSG00000259078.2"; geneSuperClass "all_pseudogene"; geneClass "pseudogene"; geneSubClass "pseudogene"; gene_type "pseudogene"; gene_name "PTBP1P"; coding_status "uncertain"; cumulative_support "ENCODE:FANTOM:GENCODE:HUBDMAP:MITRANS"; geneCategory "__na"; DHS_type "not_DHS";
hsa-mir-184	chr15	79475227	79576287	-	gene_id "ENSG00000259234.1"; geneSuperClass "all_lncRNA"; geneClass "lncRNA_intergenic"; geneSubClass "proximal_to_coding_genes_antisense_strand"; gene_type "lincRNA"; gene_name "RP11-17L5.4"; coding_status "nonCoding"; cumulative_support "GENCODE:HUBDMAP:MITRANS"; geneCategory "__na"; DHS_type "DHS_dyadic";
hsa-mir-147b	chr15	45722829	45734076	-	gene_id "ENSG00000259342.1"; geneSuperClass "all_lncRNA"; geneClass "lncRNA_antisense"; geneSubClass "ref_within_qry"; gene_type "antisense"; gene_name "RP11-519G16.5"; coding_status "nonCoding"; cumulative_support "ENCODE:GENCODE:MITRANS"; geneCategory "__na"; DHS_type "DHS_promoter";
hsa-mir-4510	chr15	36137422	36544455	-	gene_id "ENSG00000259639.1"; geneSuperClass "all_lncRNA"; geneClass "lncRNA_intergenic"; geneSubClass "far_from_coding_genes"; gene_type "lincRNA"; gene_name "RP11-184D12.1"; coding_status "nonCoding"; cumulative_support "ENCODE:FANTOM:GENCODE:MITRANS"; geneCategory "__na"; DHS_type "not_DHS";
hsa-mir-3178	chr16	2562853	2586969	+	gene_id "ENSG00000259784.1"; geneSuperClass "all_mRNA"; geneClass "coding_mRNA"; geneSubClass "protein_coding"; gene_type "protein_coding"; gene_name "ATP6C"; coding_status "coding"; cumulative_support "ENCODE:GENCODE:MITRANS"; geneCategory "coding_mRNA"; DHS_type "DHS_promoter";
hsa-mir-3176	chr16	589758	603618	-	gene_id "ENSG00000261691.1"; geneSuperClass "all_lncRNA"; geneClass "lncRNA_divergent"; geneSubClass "convergent_promoters"; gene_type "antisense"; gene_name "LA16c-366D1.3"; coding_status "uncertain"; cumulative_support "GENCODE:MITRANS"; geneCategory "e_lncRNA"; DHS_type "DHS_enhancer";
hsa-mir-3622a	chr8	27559190	27559719	-	gene_id "ENSG00000265075.1"; geneSuperClass "short_RNA"; geneClass "small_RNA"; geneSubClass "miRNA"; gene_type "miRNA"; gene_name "MIR3622A"; coding_status "nonCoding"; cumulative_support "GENCODE"; geneCategory "__na"; DHS_type "DHS_enhancer";
hsa-mir-142	chr17	56395115	56669225	+	gene_id "ENSG00000265148.1"; geneSuperClass "all_lncRNA"; geneClass "lncRNA_divergent"; geneSubClass "convergent_promoters"; gene_type "antisense"; gene_name "BZRAP1-AS1"; coding_status "uncertain"; cumulative_support "ENCODE:FANTOM:GENCODE:HUBDMAP:MITRANS"; geneCategory "e_lncRNA"; DHS_type "DHS_enhancer";
hsa-mir-423	chr17	28417384	28444501	-	gene_id "ENSG00000265394.1"; geneSuperClass "all_lncRNA"; geneClass "lncRNA_divergent"; geneSubClass "convergent_promoters"; gene_type "antisense"; gene_name "RP11-1148O4.2"; coding_status "nonCoding"; cumulative_support "GENCODE"; geneCategory "p_lncRNA_divergent"; DHS_type "DHS_promoter";
hsa-mir-423	chr17	28442280	28444229	-	gene_id "ENSG00000266919.1"; geneSuperClass "all_lncRNA"; geneClass "lncRNA_divergent"; geneSubClass "divergent_promoters"; gene_type "sense_intronic"; gene_name "MIR3184"; coding_status "nonCoding"; cumulative_support "ENCODE:FANTOM:GENCODE"; geneCategory "p_lncRNA_divergent"; DHS_type "DHS_promoter";
hsa-mir-330	chr19	46141767	46146242	+	gene_id "ENSG00000267757.1"; geneSuperClass "all_mRNA"; geneClass "coding_mRNA"; geneSubClass "protein_coding"; gene_type "protein_coding"; gene_name "AC006132.1"; coding_status "uncertain"; cumulative_support "ENCODE:FANTOM:GENCODE:MITRANS"; geneCategory "__na"; DHS_type "DHS_dyadic";
hsa-mir-371a	chr19	54287782	54291424	-	gene_id "ENSG00000269877.1"; geneSuperClass "all_lncRNA"; geneClass "lncRNA_intergenic"; geneSubClass "far_from_coding_genes"; gene_type "lincRNA"; gene_name "MIR371B"; coding_status "nonCoding"; cumulative_support "FANTOM:GENCODE:HUBDMAP:MITRANS"; geneCategory "__na"; DHS_type "not_DHS";
hsa-mir-372	chr19	54287782	54291424	-	gene_id "ENSG00000269877.1"; geneSuperClass "all_lncRNA"; geneClass "lncRNA_intergenic"; geneSubClass "far_from_coding_genes"; gene_type "lincRNA"; gene_name "MIR371B"; coding_status "nonCoding"; cumulative_support "FANTOM:GENCODE:HUBDMAP:MITRANS"; geneCategory "__na"; DHS_type "not_DHS";
hsa-let-7e	chr19	52185937	52196681	-	gene_id "ENSG00000269959.1"; geneSuperClass "all_lncRNA"; geneClass "lncRNA_intergenic"; geneSubClass "proximal_to_coding_genes_antisense_strand"; gene_type "lincRNA"; gene_name "hsa-mir-125a"; coding_status "uncertain"; cumulative_support "GENCODE:HUBDMAP:MITRANS"; geneCategory "p_lncRNA_intergenic"; DHS_type "DHS_promoter";
hsa-mir-125a	chr19	52185937	52196681	-	gene_id "ENSG00000269959.1"; geneSuperClass "all_lncRNA"; geneClass "lncRNA_intergenic"; geneSubClass "proximal_to_coding_genes_antisense_strand"; gene_type "lincRNA"; gene_name "hsa-mir-125a"; coding_status "uncertain"; cumulative_support "GENCODE:HUBDMAP:MITRANS"; geneCategory "p_lncRNA_intergenic"; DHS_type "DHS_promoter";
hsa-mir-335	chr7	130135635	130138309	-	gene_id "ENSG00000270823.1"; geneSuperClass "all_lncRNA"; geneClass "lncRNA_divergent"; geneSubClass "convergent_promoters"; gene_type "antisense"; gene_name "hsa-mir-335"; coding_status "uncertain"; cumulative_support "FANTOM:GENCODE"; geneCategory "__na"; DHS_type "not_DHS";
hsa-mir-216a	chr2	55932553	56409994	+	gene_id "ENSG00000272180.1"; geneSuperClass "all_lncRNA"; geneClass "lncRNA_intergenic"; geneSubClass "far_from_coding_genes"; gene_type "lincRNA"; gene_name "RP11-481J13.1"; coding_status "nonCoding"; cumulative_support "ENCODE:FANTOM:GENCODE:HUBDMAP:MITRANS"; geneCategory "e_lncRNA"; DHS_type "DHS_enhancer";
hsa-mir-216b	chr2	55932553	56409994	+	gene_id "ENSG00000272180.1"; geneSuperClass "all_lncRNA"; geneClass "lncRNA_intergenic"; geneSubClass "far_from_coding_genes"; gene_type "lincRNA"; gene_name "RP11-481J13.1"; coding_status "nonCoding"; cumulative_support "ENCODE:FANTOM:GENCODE:HUBDMAP:MITRANS"; geneCategory "e_lncRNA"; DHS_type "DHS_enhancer";
