# Supplementary material for: Sense–antisense miRNA pairs constitute an elaborate reciprocal regulatory circuit
Source: HighWire-hosted journal article supplement (doi:10.1101/gr.257121.119), 2020-05-01
Supplement: Supplemental_Table_S5.xlsx [file Supplemental_Table_S5.xlsx]

## Sheet: Description
Supplemental Table S5. The genic positions of miRNA-ATs.
Field	Example	Description
miRNA-AT	hsa-miR-4271-AT	The miRNA-AT name
Chr	chr3	Chromosome of the miRNA-AT
Strand	+	Strand of the miRNA-AT
Start	49311553	5' start of the miRNA-AT
End	49311619	3'end of the miRNA-AT
Genic region	3'UTR	The geneic region

## Sheet: lv4_strigent
miRNA-AT	Chr	Strand	Start	End	Genic region
hsa-let-7a-1-AT	chr9	-	96938239	96938318	Downstream
hsa-let-7a-2-AT	chr11	+	122017230	122017301	Intergenic
hsa-let-7a-3-AT	chr22	-	46508629	46508702	Intergenic
hsa-let-7b-AT	chr22	-	46509566	46509648	Intergenic
hsa-let-7c-AT	chr21	-	17912148	17912231	Intergenic
hsa-let-7d-AT	chr9	-	96941116	96941202	Intron
hsa-let-7e-AT	chr19	-	52196039	52196117	ncRNA
hsa-let-7f-1-AT	chr9	-	96938629	96938715	Downstream
hsa-let-7f-2-AT	chrX	+	53584153	53584235	Intergenic
hsa-let-7g-AT	chr3	+	52302294	52302377	Intergenic
hsa-let-7i-AT	chr12	-	62997466	62997549	Exon
hsa-miRNA-1-1-AT	chr20	-	61151513	61151583	Intergenic
hsa-miRNA-1-2-AT	chr18	+	19408965	19409049	Intron
hsa-miRNA-100-AT	chr11	+	122022937	122023016	Intergenic
hsa-miRNA-101-1-AT	chr1	+	65524117	65524191	Intergenic
hsa-miRNA-101-2-AT	chr9	-	4850297	4850375	Downstream
hsa-miRNA-103a-1-AT	chr5	+	167987901	167987978	Intergenic
hsa-miRNA-103a-2-AT	chr20	-	3898141	3898218	Intergenic
hsa-miRNA-105-1-AT	chrX	+	151560691	151560771	Intergenic
hsa-miRNA-105-2-AT	chrX	+	151562884	151562964	Intergenic
hsa-miRNA-106a-AT	chrX	+	133304228	133304308	Intergenic
hsa-miRNA-106b-AT	chr7	+	99691616	99691697	3'UTR
hsa-miRNA-107-AT	chr10	+	91352504	91352584	Intergenic
hsa-miRNA-10b-AT	chr2	-	177015031	177015140	Intergenic
hsa-miRNA-1179-AT	chr15	-	89151338	89151428	Intergenic
hsa-miRNA-1185-1-AT	chr14	-	101509314	101509399	Intergenic
hsa-miRNA-1185-2-AT	chr14	-	101510535	101510620	Intergenic
hsa-miRNA-122-AT	chr18	-	56118306	56118390	Intergenic
hsa-miRNA-124-2-AT	chr8	-	65291706	65291814	Intergenic
hsa-miRNA-1246-AT	chr2	+	177465708	177465780	Intron
hsa-miRNA-1254-2-AT	chr10	-	23682334	23682396	Intergenic
hsa-miRNA-1255a-AT	chr4	+	102251459	102251571	Intergenic
hsa-miRNA-1255b-1-AT	chr4	+	36427988	36428050	Intergenic
hsa-miRNA-1255b-2-AT	chr1	-	167967898	167967964	Intergenic
hsa-miRNA-125a-AT	chr19	-	52196507	52196592	ncRNA
hsa-miRNA-125b-1-AT	chr11	+	121970465	121970552	Intergenic
hsa-miRNA-125b-2-AT	chr21	-	17962557	17962645	Intergenic
hsa-miRNA-126-AT	chr9	-	139565054	139565138	Exon
hsa-miRNA-1260a-AT	chr14	-	77732561	77732633	ncRNA
hsa-miRNA-1262-AT	chr1	+	68649201	68649293	Intron
hsa-miRNA-1266-AT	chr15	+	52569314	52569397	Intergenic
hsa-miRNA-1268a-AT	chr15	+	22513229	22513280	Intergenic
hsa-miRNA-1268b-AT	chr17	-	78072627	78072676	Intergenic
hsa-miRNA-1269a-AT	chr4	-	67142542	67142646	Intergenic
hsa-miRNA-1269b-AT	chr17	+	12820585	12820659	Intron
hsa-miRNA-127-AT	chr14	-	101349316	101349412	ncRNA
hsa-miRNA-1271-AT	chr5	-	175794949	175795034	Intergenic
hsa-miRNA-1272-AT	chr15	+	65054586	65054714	Intergenic
hsa-miRNA-1273c-AT	chr6	-	155174494	155174570	Intergenic
hsa-miRNA-1273d-AT	chr1	-	10287776	10287861	Intergenic
hsa-miRNA-1273f-AT	chr1	-	53394346	53394444	Intergenic
hsa-miRNA-1275-AT	chr6	+	33967749	33967828	Intergenic
hsa-miRNA-1276-AT	chr15	+	86313727	86313809	Upstream
hsa-miRNA-1277-AT	chrX	-	117520357	117520434	Intergenic
hsa-miRNA-1278-AT	chr1	-	193105633	193105713	Intergenic
hsa-miRNA-128-1-AT	chr2	-	136422967	136423048	Intergenic
hsa-miRNA-128-2-AT	chr3	-	35785968	35786051	Intergenic
hsa-miRNA-1283-1-AT	chr19	-	54191735	54191821	Intergenic
hsa-miRNA-1284-AT	chr3	+	71591121	71591240	Intergenic
hsa-miRNA-1285-1-AT	chr7	+	91833329	91833412	Intergenic
hsa-miRNA-1286-AT	chr22	+	20236657	20236734	Intergenic
hsa-miRNA-1287-AT	chr10	+	100154975	100155064	Intergenic
hsa-miRNA-129-1-AT	chr7	-	127847925	127847996	Intergenic
hsa-miRNA-129-2-AT	chr11	-	43602944	43603033	Intergenic
hsa-miRNA-1290-AT	chr1	+	19223565	19223642	Intergenic
hsa-miRNA-1291-AT	chr12	+	49048227	49048313	Intergenic
hsa-miRNA-1294-AT	chr5	-	153726666	153726807	Intron
hsa-miRNA-1295a-AT	chr1	+	171070869	171070947	Intron
hsa-miRNA-1297-AT	chr13	+	54886107	54886183	Intron
hsa-miRNA-1301-AT	chr2	+	25551509	25551590	Intergenic
hsa-miRNA-1303-AT	chr5	-	154065336	154065421	Intergenic
hsa-miRNA-1307-AT	chr10	+	105154010	105154158	Intergenic
hsa-miRNA-130a-AT	chr11	-	57408671	57408759	Exon
hsa-miRNA-130b-AT	chr22	-	22007593	22007674	Intergenic
hsa-miRNA-1323-AT	chr19	-	54175222	54175294	Intergenic
hsa-miRNA-133a-1-AT	chr18	+	19405659	19405746	Intron
hsa-miRNA-133a-2-AT	chr20	-	61162119	61162220	Intergenic
hsa-miRNA-133b-AT	chr6	-	52013721	52013839	Intron
hsa-miRNA-134-AT	chr14	-	101521024	101521096	Upstream
hsa-miRNA-135a-1-AT	chr3	+	52328235	52328324	ncRNA
hsa-miRNA-135b-AT	chr1	+	205417430	205417526	Intron
hsa-miRNA-136-AT	chr14	-	101351039	101351120	ncRNA
hsa-miRNA-137-AT	chr1	+	98511626	98511727	Intergenic
hsa-miRNA-138-1-AT	chr3	-	44155704	44155802	Intergenic
hsa-miRNA-138-2-AT	chr16	-	56892430	56892513	Intergenic
hsa-miRNA-139-AT	chr11	+	72326107	72326174	Intergenic
hsa-miRNA-140-AT	chr16	-	69966984	69967083	Intergenic
hsa-miRNA-141-AT	chr12	-	7073260	7073354	Intergenic
hsa-miRNA-142-AT	chr17	+	56408593	56408679	Intron
hsa-miRNA-143-AT	chr5	-	148808481	148808586	Intergenic
hsa-miRNA-145-AT	chr5	-	148810209	148810296	Intergenic
hsa-miRNA-1468-AT	chrX	+	63005882	63005967	Intergenic
hsa-miRNA-146a-AT	chr5	-	159912359	159912457	Intergenic
hsa-miRNA-146b-AT	chr10	-	104196269	104196341	Intergenic
hsa-miRNA-147b-AT	chr15	-	45725248	45725327	Intron
hsa-miRNA-148b-AT	chr12	-	54731000	54731098	Intergenic
hsa-miRNA-151b-AT	chr14	+	100575756	100575851	Intron
hsa-miRNA-152-AT	chr17	+	46114527	46114613	Intergenic
hsa-miRNA-153-1-AT	chr2	+	220158833	220158922	Intergenic
hsa-miRNA-153-2-AT	chr7	+	157367028	157367114	Intergenic
hsa-miRNA-154-AT	chr14	-	101526092	101526175	Intergenic
hsa-miRNA-155-AT	chr21	-	26946292	26946356	Intron
hsa-miRNA-15b-AT	chr3	-	160122376	160122473	Intron
hsa-miRNA-17-AT	chr13	-	92002859	92002942	Intergenic
hsa-miRNA-181a-1-AT	chr1	+	198828173	198828282	Intergenic
hsa-miRNA-181a-2-AT	chr9	-	127454721	127454830	Intron
hsa-miRNA-181b-1-AT	chr1	+	198828002	198828111	Intergenic
hsa-miRNA-181b-2-AT	chr9	-	127455989	127456077	Intron
hsa-miRNA-181c-AT	chr19	-	13985513	13985622	Intergenic
hsa-miRNA-181d-AT	chr19	-	13985689	13985825	Intergenic
hsa-miRNA-182-AT	chr7	+	129410223	129410332	Intergenic
hsa-miRNA-1827-AT	chr12	-	100583662	100583727	Exon
hsa-miRNA-183-AT	chr7	+	129414745	129414854	Intergenic
hsa-miRNA-184-AT	chr15	-	79502130	79502213	Intron
hsa-miRNA-186-AT	chr1	+	71533314	71533399	Downstream
hsa-miRNA-187-AT	chr18	+	33484781	33484889	Intergenic
hsa-miRNA-188-AT	chrX	-	49768109	49768194	Intergenic
hsa-miRNA-18a-AT	chr13	-	92003005	92003075	Intergenic
hsa-miRNA-18b-AT	chrX	+	133304071	133304141	Intergenic
hsa-miRNA-190a-AT	chr15	-	63116156	63116240	Intergenic
hsa-miRNA-190b-AT	chr1	+	154166141	154166219	Intergenic
hsa-miRNA-191-AT	chr3	+	49058051	49058142	Exon
hsa-miRNA-1910-AT	chr16	+	85775227	85775306	Intergenic
hsa-miRNA-1912-AT	chrX	-	113886019	113886098	Intergenic
hsa-miRNA-192-AT	chr11	+	64658609	64658718	Intergenic
hsa-miRNA-193b-AT	chr16	-	14397824	14397906	Intergenic
hsa-miRNA-194-1-AT	chr1	+	220291499	220291583	Intron
hsa-miRNA-194-2-AT	chr11	+	64658827	64658911	Intergenic
hsa-miRNA-195-AT	chr17	+	6920934	6921020	ncRNA
hsa-miRNA-196a-1-AT	chr17	+	46709852	46709921	Intron
hsa-miRNA-196a-2-AT	chr12	-	54385522	54385631	Exon
hsa-miRNA-1973-AT	chr4	-	117220881	117220924	Intergenic
hsa-miRNA-199a-1-AT	chr19	+	10928102	10928172	Intron
hsa-miRNA-199a-2-AT	chr1	+	172113675	172113784	Intron
hsa-miRNA-199b-AT	chr9	+	131007000	131007109	Intron
hsa-miRNA-19b-1-AT	chr13	-	92003446	92003532	Intergenic
hsa-miRNA-200a-AT	chr1	-	1103243	1103332	Intergenic
hsa-miRNA-200c-AT	chr12	-	7072862	7072929	Intergenic
hsa-miRNA-202-AT	chr10	+	135061015	135061124	Intergenic
hsa-miRNA-205-AT	chr1	-	209605478	209605587	Intergenic
hsa-miRNA-206-AT	chr6	-	52009147	52009232	Intergenic
hsa-miRNA-208a-AT	chr14	+	23857805	23857875	Intergenic
hsa-miRNA-208b-AT	chr14	+	23887196	23887272	Intergenic
hsa-miRNA-20a-AT	chr13	-	92003319	92003389	Intergenic
hsa-miRNA-21-AT	chr17	-	57918627	57918698	Intron
hsa-miRNA-211-AT	chr15	+	31357235	31357344	Intergenic
hsa-miRNA-2110-AT	chr10	+	115933864	115933938	Intergenic
hsa-miRNA-2116-AT	chr15	+	59463382	59463461	Intergenic
hsa-miRNA-214-AT	chr1	+	172107938	172108047	Intron
hsa-miRNA-215-AT	chr1	+	220291195	220291304	Intron
hsa-miRNA-216a-AT	chr2	+	56216085	56216194	Intron
hsa-miRNA-216b-AT	chr2	+	56227849	56227930	Intron
hsa-miRNA-218-1-AT	chr4	-	20529898	20530007	Intergenic
hsa-miRNA-218-2-AT	chr5	+	168195151	168195260	Intron
hsa-miRNA-219a-1-AT	chr6	-	33175612	33175721	Exon
hsa-miRNA-22-AT	chr17	+	1617197	1617281	Intergenic
hsa-miRNA-221-AT	chrX	+	45605585	45605694	Intron
hsa-miRNA-222-AT	chrX	+	45606421	45606530	Exon
hsa-miRNA-223-AT	chrX	-	65238712	65238821	Intergenic
hsa-miRNA-224-AT	chrX	+	151127050	151127130	Intergenic
hsa-miRNA-23b-AT	chr9	-	97847490	97847586	Downstream
hsa-miRNA-23c-AT	chrX	+	20035206	20035305	Intergenic
hsa-miRNA-24-2-AT	chr19	+	13947101	13947173	Exon
hsa-miRNA-25-AT	chr7	+	99691183	99691266	3'UTR
hsa-miRNA-2681-AT	chr13	+	102619992	102620096	Intergenic
hsa-miRNA-2682-AT	chr1	+	98510798	98510907	Intergenic
hsa-miRNA-26a-2-AT	chr12	+	58218392	58218475	3'UTR
hsa-miRNA-26b-AT	chr2	-	219267369	219267445	Intergenic
hsa-miRNA-27a-AT	chr19	+	13947254	13947331	Exon
hsa-miRNA-27b-AT	chr9	-	97847727	97847823	Exon
hsa-miRNA-28-AT	chr3	-	188406569	188406654	Intergenic
hsa-miRNA-296-AT	chr20	+	57392670	57392749	Intergenic
hsa-miRNA-299-AT	chr14	-	101490131	101490193	Intergenic
hsa-miRNA-29b-1-AT	chr7	+	130562218	130562298	Intron
hsa-miRNA-29b-2-AT	chr1	+	207975788	207975868	Intergenic
hsa-miRNA-29c-AT	chr1	+	207975197	207975284	Intergenic
hsa-miRNA-301a-AT	chr17	+	57228497	57228582	Intergenic
hsa-miRNA-301b-AT	chr22	-	22007270	22007347	Intergenic
hsa-miRNA-302a-AT	chr4	+	113569339	113569407	Intron
hsa-miRNA-302b-AT	chr4	+	113569641	113569713	Intron
hsa-miRNA-302c-AT	chr4	+	113569519	113569586	Intron
hsa-miRNA-302d-AT	chr4	+	113569160	113569227	Intron
hsa-miRNA-302e-AT	chr11	-	7255997	7256068	Intergenic
hsa-miRNA-30a-AT	chr6	+	72113254	72113324	Intergenic
hsa-miRNA-30b-AT	chr8	+	135812763	135812850	Intergenic
hsa-miRNA-30c-1-AT	chr1	-	41222956	41223044	Intergenic
hsa-miRNA-30d-AT	chr8	+	135817119	135817188	Intergenic
hsa-miRNA-30e-AT	chr1	-	41220027	41220118	Intergenic
hsa-miRNA-31-AT	chr9	+	21512114	21512184	Intergenic
hsa-miRNA-3123-AT	chr1	-	241295572	241295646	Intron
hsa-miRNA-3127-AT	chr2	-	97464015	97464090	Intergenic
hsa-miRNA-3131-AT	chr2	+	219923410	219923472	Intergenic
hsa-miRNA-3135a-AT	chr3	-	20179057	20179133	Intergenic
hsa-miRNA-3135b-AT	chr6	+	32717689	32717756	Intergenic
hsa-miRNA-3138-AT	chr4	+	10080235	10080316	Intergenic
hsa-miRNA-3141-AT	chr5	+	153975572	153975632	Intergenic
hsa-miRNA-3144-AT	chr6	-	120336325	120336403	Intergenic
hsa-miRNA-3147-AT	chr7	-	57472731	57472796	Intergenic
hsa-miRNA-3149-AT	chr8	+	77879004	77879086	Intergenic
hsa-miRNA-3150b-AT	chr8	+	96085139	96085224	Intron
hsa-miRNA-3154-AT	chr9	+	131007226	131007309	Intron
hsa-miRNA-3159-AT	chr11	-	18409334	18409407	Intergenic
hsa-miRNA-3162-AT	chr11	+	59362550	59362631	Intergenic
hsa-miRNA-3168-AT	chr13	+	41675155	41675236	Intergenic
hsa-miRNA-3175-AT	chr15	-	93447629	93447705	Intergenic
hsa-miRNA-3176-AT	chr16	-	593277	593366	Intergenic
hsa-miRNA-3178-AT	chr16	+	2581923	2582006	3'UTR
hsa-miRNA-3182-AT	chr16	-	83541951	83542013	Intergenic
hsa-miRNA-3190-AT	chr19	-	47730199	47730278	Exon
hsa-miRNA-3196-AT	chr20	-	61870131	61870194	Intergenic
hsa-miRNA-32-AT	chr9	+	111808509	111808578	Intergenic
hsa-miRNA-3200-AT	chr22	-	31127544	31127628	Intergenic
hsa-miRNA-320a-AT	chr8	+	22102475	22102556	Upstream
hsa-miRNA-320b-1-AT	chr1	-	117214371	117214449	Intergenic
hsa-miRNA-320c-2-AT	chr18	-	21901650	21901699	Intron
hsa-miRNA-320d-2-AT	chrX	+	140008337	140008384	Intergenic
hsa-miRNA-320e-AT	chr19	+	47212550	47212602	Intron
hsa-miRNA-323a-AT	chr14	-	101492069	101492154	Upstream
hsa-miRNA-326-AT	chr11	+	75046136	75046230	Intergenic
hsa-miRNA-328-AT	chr16	+	67236224	67236298	Intron
hsa-miRNA-329-2-AT	chr14	-	101493437	101493520	Intergenic
hsa-miRNA-330-AT	chr19	+	46142252	46142345	Intron
hsa-miRNA-331-AT	chr12	-	95702196	95702289	Intergenic
hsa-miRNA-335-AT	chr7	-	130135952	130136045	ncRNA
hsa-miRNA-337-AT	chr14	-	101340830	101340922	Intergenic
hsa-miRNA-33a-AT	chr22	-	42296948	42297016	Intron
hsa-miRNA-342-AT	chr14	-	100575992	100576090	Upstream
hsa-miRNA-345-AT	chr14	-	100774196	100774293	Intergenic
hsa-miRNA-346-AT	chr10	+	88024451	88024545	Intergenic
hsa-miRNA-34a-AT	chr1	+	9211727	9211836	Intergenic
hsa-miRNA-34c-AT	chr11	-	111384164	111384240	Intron
hsa-miRNA-3605-AT	chr1	+	33797994	33798093	Exon
hsa-miRNA-3606-AT	chr2	-	189860356	189860418	Exon
hsa-miRNA-3609-AT	chr7	-	98479273	98479352	Intergenic
hsa-miRNA-361-AT	chrX	+	85158641	85158712	Intergenic
hsa-miRNA-3610-AT	chr8	+	117886967	117887039	ncRNA
hsa-miRNA-3612-AT	chr12	-	128778637	128778723	Intergenic
hsa-miRNA-3614-AT	chr17	+	54968631	54968716	Intron
hsa-miRNA-3616-AT	chr20	-	45795609	45795700	Intergenic
hsa-miRNA-362-AT	chrX	-	49773572	49773636	Intergenic
hsa-miRNA-3620-AT	chr1	-	228284964	228285042	ncRNA
hsa-miRNA-3622a-AT	chr8	-	27559194	27559276	ncRNA
hsa-miRNA-3652-AT	chr12	-	104324203	104324333	Upstream
hsa-miRNA-3656-AT	chr11	-	118889654	118889722	Upstream
hsa-miRNA-365a-AT	chr16	-	14403142	14403228	Intergenic
hsa-miRNA-365b-AT	chr17	-	29902430	29902540	Intergenic
hsa-miRNA-3663-AT	chr10	+	118927189	118927285	Intergenic
hsa-miRNA-3664-AT	chr11	+	70718375	70718473	Intergenic
hsa-miRNA-3667-AT	chr22	+	49937041	49937114	Intergenic
hsa-miRNA-369-AT	chr14	-	101531935	101532004	Intergenic
hsa-miRNA-371a-AT	chr19	-	54290929	54290995	ncRNA
hsa-miRNA-372-AT	chr19	-	54291144	54291210	ncRNA
hsa-miRNA-373-AT	chr19	-	54291959	54292027	Upstream
hsa-miRNA-374a-AT	chrX	+	73507121	73507192	Intergenic
hsa-miRNA-374b-AT	chrX	+	73438382	73438453	Intergenic
hsa-miRNA-376a-1-AT	chr14	-	101507119	101507186	Intergenic
hsa-miRNA-376b-AT	chr14	-	101506773	101506872	Intergenic
hsa-miRNA-376c-AT	chr14	-	101506027	101506092	Intergenic
hsa-miRNA-377-AT	chr14	-	101528387	101528455	Intergenic
hsa-miRNA-378a-AT	chr5	-	149112388	149112453	Intergenic
hsa-miRNA-378b-AT	chr3	-	10371913	10371969	Intron
hsa-miRNA-378c-AT	chr10	+	132760851	132760931	Intergenic
hsa-miRNA-378d-1-AT	chr4	+	5925002	5925055	Intergenic
hsa-miRNA-378d-2-AT	chr8	+	94928250	94928347	Intron
hsa-miRNA-378f-AT	chr1	-	24255560	24255637	Intron
hsa-miRNA-378g-AT	chr1	+	95211416	95211456	Intergenic
hsa-miRNA-378j-AT	chr17	+	35974976	35975084	Intergenic
hsa-miRNA-379-AT	chr14	-	101488403	101488469	Intergenic
hsa-miRNA-380-AT	chr14	-	101491354	101491414	ncRNA
hsa-miRNA-381-AT	chr14	-	101512257	101512331	Intergenic
hsa-miRNA-382-AT	chr14	-	101520643	101520718	ncRNA
hsa-miRNA-383-AT	chr8	+	14710947	14711019	Intergenic
hsa-miRNA-3907-AT	chr7	+	151130575	151130725	Intron
hsa-miRNA-3910-1-AT	chr9	-	94398533	94398643	3'UTR
hsa-miRNA-3926-1-AT	chr8	+	12584741	12584813	Intergenic
hsa-miRNA-3928-AT	chr22	+	31556048	31556105	Upstream
hsa-miRNA-3929-AT	chr18	+	33514051	33514105	Intergenic
hsa-miRNA-3940-AT	chr19	+	6416421	6416522	Intergenic
hsa-miRNA-409-AT	chr14	-	101531637	101531715	Intergenic
hsa-miRNA-410-AT	chr14	-	101532249	101532328	Exon
hsa-miRNA-411-AT	chr14	-	101489662	101489757	Intergenic
hsa-miRNA-412-AT	chr14	-	101531784	101531874	Intergenic
hsa-miRNA-421-AT	chrX	+	73438212	73438296	Intergenic
hsa-miRNA-423-AT	chr17	-	28444097	28444190	Intron
hsa-miRNA-424-AT	chrX	+	133680644	133680741	Intergenic
hsa-miRNA-425-AT	chr3	+	49057581	49057667	Exon
hsa-miRNA-4271-AT	chr3	-	49311553	49311619	ncRNA
hsa-miRNA-4279-AT	chr5	+	31936208	31936265	Exon
hsa-miRNA-4284-AT	chr7	-	73125647	73125727	Intron
hsa-miRNA-4286-AT	chr8	-	10524488	10524580	Intron
hsa-miRNA-4289-AT	chr9	+	91360751	91360820	Intergenic
hsa-miRNA-4298-AT	chr11	+	1880694	1880766	Exon
hsa-miRNA-4306-AT	chr13	-	100295313	100295403	Intergenic
hsa-miRNA-431-AT	chr14	-	101347344	101347457	ncRNA
hsa-miRNA-432-AT	chr14	-	101350820	101350913	ncRNA
hsa-miRNA-4328-AT	chrX	+	78156691	78156746	Intergenic
hsa-miRNA-433-AT	chr14	-	101348223	101348315	ncRNA
hsa-miRNA-4417-AT	chr1	-	5624131	5624203	Intergenic
hsa-miRNA-4419a-AT	chr1	+	23384351	23384427	Exon
hsa-miRNA-4419b-AT	chr12	-	128729051	128729118	Intergenic
hsa-miRNA-4421-AT	chr1	-	51525509	51525577	Intergenic
hsa-miRNA-4423-AT	chr1	-	85599477	85599556	Intergenic
hsa-miRNA-4425-AT	chr1	-	25349994	25350077	Intergenic
hsa-miRNA-4429-AT	chr2	+	11680731	11680803	Exon
hsa-miRNA-4430-AT	chr2	-	33643583	33643631	Intergenic
hsa-miRNA-4431-AT	chr2	+	52929660	52929753	Intergenic
hsa-miRNA-4442-AT	chr3	+	25706364	25706430	Exon
hsa-miRNA-4443-AT	chr3	-	48238054	48238106	Intergenic
hsa-miRNA-4444-2-AT	chr3	-	75263627	75263700	Intergenic
hsa-miRNA-4446-AT	chr3	-	113313723	113313789	Intergenic
hsa-miRNA-4448-AT	chr3	-	183604588	183604673	Intergenic
hsa-miRNA-4452-AT	chr4	+	87463635	87463705	Intergenic
hsa-miRNA-4453-AT	chr4	-	153457580	153457668	Exon
hsa-miRNA-4455-AT	chr4	+	185859537	185859594	Exon
hsa-miRNA-4458-AT	chr5	-	8461038	8461112	Intergenic
hsa-miRNA-4459-AT	chr5	+	53371348	53371413	Intergenic
hsa-miRNA-4464-AT	chr6	-	91022461	91022552	Intergenic
hsa-miRNA-4472-2-AT	chr12	+	116866057	116866123	Intergenic
hsa-miRNA-4476-AT	chr9	+	36893459	36893528	Intergenic
hsa-miRNA-4478-AT	chr9	+	124882361	124882446	Intergenic
hsa-miRNA-4484-AT	chr10	-	127508309	127508391	Intron
hsa-miRNA-4487-AT	chr11	-	47422521	47422593	Intron
hsa-miRNA-449a-AT	chr5	+	54466360	54466450	Intergenic
hsa-miRNA-449b-AT	chr5	+	54466474	54466570	Intergenic
hsa-miRNA-449c-AT	chr5	+	54468090	54468181	Intergenic
hsa-miRNA-4500-AT	chr13	+	88270920	88270995	Intergenic
hsa-miRNA-4502-AT	chr13	-	115039303	115039383	Intron
hsa-miRNA-450a-2-AT	chrX	+	133674538	133674637	Intergenic
hsa-miRNA-4510-AT	chr15	-	36219057	36219124	Intergenic
hsa-miRNA-4511-AT	chr15	+	66011584	66011670	Intergenic
hsa-miRNA-4512-AT	chr15	+	66789296	66789372	Intergenic
hsa-miRNA-4518-AT	chr16	-	30515240	30515322	Intergenic
hsa-miRNA-451a-AT	chr17	+	27188387	27188458	Downstream
hsa-miRNA-452-AT	chrX	+	151128100	151128184	Intergenic
hsa-miRNA-4521-AT	chr17	-	8090263	8090322	Exon
hsa-miRNA-4525-AT	chr17	+	80626109	80626183	Intergenic
hsa-miRNA-4531-AT	chr19	+	45156956	45157002	Intron
hsa-miRNA-4532-AT	chr20	-	56470450	56470500	Intergenic
hsa-miRNA-4536-1-AT	chrX	+	55477928	55478015	ncRNA
hsa-miRNA-454-AT	chr17	+	57215119	57215233	Intergenic
hsa-miRNA-455-AT	chr9	-	116971714	116971809	Intergenic
hsa-miRNA-4635-AT	chr5	+	1063011	1063089	Intergenic
hsa-miRNA-4662a-AT	chr8	-	125834227	125834293	ncRNA
hsa-miRNA-4695-AT	chr1	+	19209696	19209769	Intergenic
hsa-miRNA-4708-AT	chr14	+	65801835	65801901	Intron
hsa-miRNA-4710-AT	chr14	+	105144031	105144086	Intergenic
hsa-miRNA-4716-AT	chr15	+	49461267	49461350	Intron
hsa-miRNA-4732-AT	chr17	+	27188673	27188748	Downstream
hsa-miRNA-4738-AT	chr17	+	73780602	73780688	ncRNA
hsa-miRNA-4750-AT	chr19	-	50391432	50391487	3'UTR
hsa-miRNA-4772-AT	chr2	-	103048749	103048826	Intergenic
hsa-miRNA-4791-AT	chr3	+	19356340	19356423	Intron
hsa-miRNA-4792-AT	chr3	+	24562853	24562926	Intergenic
hsa-miRNA-483-AT	chr11	+	2155364	2155439	Intron
hsa-miRNA-485-AT	chr14	-	101521756	101521828	Intergenic
hsa-miRNA-486-AT	chr8	+	41517959	41518026	ncRNA
hsa-miRNA-487a-AT	chr14	-	101518783	101518862	Intergenic
hsa-miRNA-487b-AT	chr14	-	101512792	101512875	Intergenic
hsa-miRNA-488-AT	chr1	+	176998499	176998581	Intergenic
hsa-miRNA-490-AT	chr7	-	136587914	136588041	Intron
hsa-miRNA-493-AT	chr14	-	101335397	101335485	Intergenic
hsa-miRNA-494-AT	chr14	-	101495971	101496051	Intergenic
hsa-miRNA-495-AT	chr14	-	101500092	101500173	Intergenic
hsa-miRNA-496-AT	chr14	-	101526910	101527011	Intergenic
hsa-miRNA-497-AT	chr17	+	6921230	6921341	ncRNA
hsa-miRNA-499a-AT	chr20	-	33578179	33578300	Intergenic
hsa-miRNA-5001-AT	chr2	+	233415184	233415283	ncRNA
hsa-miRNA-500a-AT	chrX	-	49773039	49773122	Intergenic
hsa-miRNA-500b-AT	chrX	-	49775280	49775358	Intergenic
hsa-miRNA-501-AT	chrX	-	49774330	49774413	Intergenic
hsa-miRNA-5010-AT	chr17	-	40666206	40666325	Intergenic
hsa-miRNA-502-AT	chrX	-	49779206	49779291	Intergenic
hsa-miRNA-503-AT	chrX	+	133680358	133680428	Intergenic
hsa-miRNA-504-AT	chrX	+	137749872	137749954	Intergenic
hsa-miRNA-505-AT	chrX	+	139006307	139006390	Intergenic
hsa-miRNA-506-AT	chrX	+	146312238	146312361	Intron
hsa-miRNA-507-AT	chrX	+	146312502	146312595	Intron
hsa-miRNA-508-AT	chrX	+	146318431	146318545	Intron
hsa-miRNA-5088-AT	chr19	-	50185374	50185452	Intergenic
hsa-miRNA-5090-AT	chr7	-	102106189	102106273	3'UTR
hsa-miRNA-5096-AT	chr4	-	79741906	79741975	Intergenic
hsa-miRNA-510-AT	chrX	+	146353853	146353926	Intergenic
hsa-miRNA-5100-AT	chr10	-	43493011	43493129	Intergenic
hsa-miRNA-513b-AT	chrX	+	146280562	146280645	Intron
hsa-miRNA-513c-AT	chrX	+	146271222	146271305	Intron
hsa-miRNA-514b-AT	chrX	+	146331669	146331748	Intron
hsa-miRNA-516a-2-AT	chr19	-	54264387	54264476	Upstream
hsa-miRNA-516b-1-AT	chr19	-	54240099	54240188	Intergenic
hsa-miRNA-517b-AT	chr19	-	54224330	54224396	Intergenic
hsa-miRNA-517c-AT	chr19	-	54244567	54244661	Intergenic
hsa-miRNA-5187-AT	chr1	-	161196976	161197051	Intergenic
hsa-miRNA-518e-AT	chr19	-	54233092	54233179	Intergenic
hsa-miRNA-5193-AT	chr3	+	49843570	49843678	Exon
hsa-miRNA-5196-AT	chr19	-	35836416	35836530	Intergenic
hsa-miRNA-519a-1-AT	chr19	-	54255651	54255735	Intergenic
hsa-miRNA-519c-AT	chr19	-	54189723	54189809	Intergenic
hsa-miRNA-519d-AT	chr19	-	54216601	54216688	Intergenic
hsa-miRNA-520b-AT	chr19	-	54204481	54204541	Intergenic
hsa-miRNA-520d-AT	chr19	-	54223350	54223436	Upstream
hsa-miRNA-520f-AT	chr19	-	54185413	54185499	Intergenic
hsa-miRNA-522-AT	chr19	-	54254465	54254551	Intergenic
hsa-miRNA-523-AT	chr19	-	54201639	54201725	Intergenic
hsa-miRNA-524-AT	chr19	-	54214256	54214342	Intergenic
hsa-miRNA-526b-AT	chr19	-	54197647	54197729	Intergenic
hsa-miRNA-539-AT	chr14	-	101513658	101513735	Intergenic
hsa-miRNA-541-AT	chr14	-	101530832	101530915	Intergenic
hsa-miRNA-542-AT	chrX	+	133675371	133675467	Intergenic
hsa-miRNA-543-AT	chr14	-	101498324	101498401	Intergenic
hsa-miRNA-544b-AT	chr3	-	124451286	124451363	Downstream
hsa-miRNA-545-AT	chrX	+	73506939	73507044	Intergenic
hsa-miRNA-548a-1-AT	chr6	-	18572015	18572111	Intergenic
hsa-miRNA-548a-2-AT	chr6	-	135560298	135560394	Intergenic
hsa-miRNA-548a-3-AT	chr8	+	105496597	105496693	Intergenic
hsa-miRNA-548ab-AT	chr3	+	103242877	103242960	Intergenic
hsa-miRNA-548ac-AT	chr1	+	117102646	117102733	Intergenic
hsa-miRNA-548ad-AT	chr2	-	35696471	35696552	Intergenic
hsa-miRNA-548ae-1-AT	chr2	-	185243702	185243771	Intergenic
hsa-miRNA-548ae-2-AT	chr5	+	57825870	57825936	Intergenic
hsa-miRNA-548ag-1-AT	chr4	-	61788337	61788402	Intergenic
hsa-miRNA-548ag-2-AT	chr20	-	59139620	59139683	Intergenic
hsa-miRNA-548ah-AT	chr4	-	77496704	77496779	Intergenic
hsa-miRNA-548ai-AT	chr6	-	99572485	99572572	Intergenic
hsa-miRNA-548aj-1-AT	chr6	+	132436332	132436403	Intergenic
hsa-miRNA-548aj-2-AT	chrX	+	37883148	37883239	Intron
hsa-miRNA-548ak-AT	chr10	+	12172759	12172815	Intron
hsa-miRNA-548al-AT	chr11	-	74110282	74110378	Upstream
hsa-miRNA-548am-AT	chrX	+	16645135	16645208	Intergenic
hsa-miRNA-548an-AT	chrX	-	105883044	105883126	Intergenic
hsa-miRNA-548ap-AT	chr15	-	86368866	86368961	Intergenic
hsa-miRNA-548aq-AT	chr3	+	185485635	185485692	Intergenic
hsa-miRNA-548as-AT	chr13	-	93142416	93142473	Intergenic
hsa-miRNA-548au-AT	chr9	-	96357123	96357176	Intergenic
hsa-miRNA-548av-AT	chr18	+	70520556	70520617	Intergenic
hsa-miRNA-548aw-AT	chr9	-	135821094	135821158	Intergenic
hsa-miRNA-548ax-AT	chrX	+	11336734	11336806	Intergenic
hsa-miRNA-548ay-AT	chr3	+	32547775	32547881	Intergenic
hsa-miRNA-548az-AT	chr8	-	120337411	120337505	Intergenic
hsa-miRNA-548b-AT	chr6	+	119390212	119390308	Intergenic
hsa-miRNA-548e-AT	chr10	-	112748684	112748771	Intergenic
hsa-miRNA-548f-1-AT	chr10	+	56367634	56367717	Intron
hsa-miRNA-548f-2-AT	chr2	+	213290987	213291084	Intergenic
hsa-miRNA-548f-3-AT	chr5	+	109849530	109849616	Intergenic
hsa-miRNA-548g-AT	chr4	+	148265781	148265869	Intergenic
hsa-miRNA-548h-1-AT	chr14	+	64561742	64561843	Intron
hsa-miRNA-548h-2-AT	chr16	+	11400297	11400384	Intron
hsa-miRNA-548h-3-AT	chr17	+	13446846	13446963	Intergenic
hsa-miRNA-548h-4-AT	chr8	+	26906370	26906480	Intergenic
hsa-miRNA-548h-5-AT	chr6	-	132113312	132113371	Intergenic
hsa-miRNA-548i-4-AT	chrX	+	83480760	83480836	Intergenic
hsa-miRNA-548j-AT	chr22	+	26951178	26951289	Intergenic
hsa-miRNA-548n-AT	chr7	+	34980372	34980446	Intergenic
hsa-miRNA-548o-2-AT	chr20	-	37145206	37145275	Intergenic
hsa-miRNA-548p-AT	chr5	+	100152186	100152269	Intergenic
hsa-miRNA-548q-AT	chr10	+	12767253	12767352	Intron
hsa-miRNA-548s-AT	chr2	-	11907570	11907651	Intergenic
hsa-miRNA-548w-AT	chr16	-	26036558	26036631	Intergenic
hsa-miRNA-548x-AT	chr21	+	20058408	20058482	Intergenic
hsa-miRNA-548x-2-AT	chr13	+	66540462	66540561	Intergenic
hsa-miRNA-548y-AT	chr14	+	48230198	48230307	Intergenic
hsa-miRNA-549a-AT	chr15	+	81134319	81134414	Intron
hsa-miRNA-551a-AT	chr1	+	3477259	3477354	Intergenic
hsa-miRNA-551b-AT	chr3	-	168269642	168269737	Intergenic
hsa-miRNA-556-AT	chr1	-	162312336	162312430	Intergenic
hsa-miRNA-5571-AT	chr22	-	23228447	23228559	Intron
hsa-miRNA-558-AT	chr2	-	32757220	32757313	Intergenic
hsa-miRNA-5588-AT	chr3	+	184970998	184971060	Intergenic
hsa-miRNA-561-AT	chr2	-	189162219	189162315	Intergenic
hsa-miRNA-567-AT	chr3	-	111831648	111831745	Intergenic
hsa-miRNA-5684-AT	chr19	-	12897942	12898006	Exon
hsa-miRNA-5689-AT	chr6	-	10439950	10440027	Intergenic
hsa-miRNA-5699-AT	chr10	+	687629	687718	Intergenic
hsa-miRNA-574-AT	chr4	-	38869653	38869748	Intergenic
hsa-miRNA-577-AT	chr4	-	115577915	115578010	Intergenic
hsa-miRNA-579-AT	chr5	+	32394484	32394581	Intergenic
hsa-miRNA-582-AT	chr5	+	58999432	58999529	Intergenic
hsa-miRNA-584-AT	chr5	+	148441876	148441972	Upstream
hsa-miRNA-585-AT	chr5	+	168690605	168690698	Intergenic
hsa-miRNA-590-AT	chr7	-	73605528	73605624	Intergenic
hsa-miRNA-592-AT	chr7	+	126698142	126698238	Intergenic
hsa-miRNA-598-AT	chr8	+	10892716	10892812	Intergenic
hsa-miRNA-599-AT	chr8	+	100548864	100548958	Intron
hsa-miRNA-600-AT	chr9	+	125873825	125873922	3'UTR
hsa-miRNA-6088-AT	chr19	-	45939912	45939962	Intron
hsa-miRNA-6125-AT	chr12	-	62654140	62654235	Exon
hsa-miRNA-6127-AT	chr1	+	22959751	22959859	Intergenic
hsa-miRNA-6128-AT	chr11	-	56511349	56511457	Upstream
hsa-miRNA-6129-AT	chr17	+	47365708	47365816	Intergenic
hsa-miRNA-6130-AT	chr21	-	24451606	24451714	Intergenic
hsa-miRNA-6131-AT	chr5	-	10478149	10478257	Intergenic
hsa-miRNA-6133-AT	chr7	-	132975635	132975742	Intergenic
hsa-miRNA-6134-AT	chrX	+	28513672	28513780	Intergenic
hsa-miRNA-616-AT	chr12	+	57912946	57913042	Exon
hsa-miRNA-619-AT	chr12	+	109230684	109230782	Intergenic
hsa-miRNA-622-AT	chr13	-	90883436	90883531	Intergenic
hsa-miRNA-624-AT	chr14	+	31483852	31483948	Intergenic
hsa-miRNA-625-AT	chr14	-	65937820	65937904	Intergenic
hsa-miRNA-627-AT	chr15	+	42491768	42491864	Intergenic
hsa-miRNA-628-AT	chr15	+	55665138	55665232	Intergenic
hsa-miRNA-632-AT	chr17	-	30677128	30677221	Exon
hsa-miRNA-641-AT	chr19	+	40788450	40788548	Intergenic
hsa-miRNA-6499-AT	chr5	+	150901648	150901709	Intergenic
hsa-miRNA-6500-AT	chr1	-	51525690	51525775	Intergenic
hsa-miRNA-6503-AT	chr11	+	59976544	59976629	Intron
hsa-miRNA-6507-AT	chr10	+	100684256	100684325	Intergenic
hsa-miRNA-651-AT	chrX	-	8095006	8095102	Intergenic
hsa-miRNA-6510-AT	chr17	+	39673416	39673469	Intergenic
hsa-miRNA-652-AT	chrX	-	109298557	109298654	Intergenic
hsa-miRNA-653-AT	chr7	+	93112072	93112167	Intergenic
hsa-miRNA-654-AT	chr14	-	101506556	101506636	Intergenic
hsa-miRNA-655-AT	chr14	-	101515887	101515983	Intergenic
hsa-miRNA-656-AT	chr14	-	101533061	101533138	Exon
hsa-miRNA-659-AT	chr22	+	38243685	38243781	Intergenic
hsa-miRNA-660-AT	chrX	-	49777849	49777945	Intergenic
hsa-miRNA-664b-AT	chrX	-	153996871	153996931	Intergenic
hsa-miRNA-665-AT	chr14	-	101341370	101341441	Intergenic
hsa-miRNA-6720-AT	chr6	+	1390549	1390646	ncRNA
hsa-miRNA-675-AT	chr11	+	2017989	2018061	Exon
hsa-miRNA-7-2-AT	chr15	-	89155056	89155165	Intergenic
hsa-miRNA-7-3-AT	chr19	-	4770682	4770791	Intergenic
hsa-miRNA-708-AT	chr11	+	79113066	79113153	Intergenic
hsa-miRNA-7153-AT	chr18	+	11654884	11654940	Intergenic
hsa-miRNA-758-AT	chr14	-	101492357	101492444	Upstream
hsa-miRNA-760-AT	chr1	-	94312388	94312467	Exon
hsa-miRNA-766-AT	chrX	+	118780701	118780811	Intergenic
hsa-miRNA-767-AT	chrX	+	151561893	151562001	Intergenic
hsa-miRNA-769-AT	chr19	-	46522190	46522307	Downstream
hsa-miRNA-7975-AT	chr19	+	55634593	55634660	Exon
hsa-miRNA-8086-AT	chr10	+	28578187	28578279	Intergenic
hsa-miRNA-873-AT	chr9	+	28888877	28888953	Intergenic
hsa-miRNA-876-AT	chr9	+	28863624	28863704	Intergenic
hsa-miRNA-877-AT	chr6	-	30552109	30552194	Intergenic
hsa-miRNA-885-AT	chr3	+	10436173	10436246	Intron
hsa-miRNA-889-AT	chr14	-	101514238	101514316	Intergenic
hsa-miRNA-9-2-AT	chr5	+	87962671	87962757	Intergenic
hsa-miRNA-92a-1-AT	chr13	-	92003568	92003645	Intergenic
hsa-miRNA-93-AT	chr7	+	99691391	99691470	3'UTR
hsa-miRNA-942-AT	chr1	-	117637265	117637350	Intergenic
hsa-miRNA-944-AT	chr3	-	189547711	189547798	Intergenic
hsa-miRNA-95-AT	chr4	+	8007028	8007108	Intergenic
hsa-miRNA-96-AT	chr7	+	129414532	129414609	Intergenic
hsa-miRNA-98-AT	chrX	+	53583184	53583302	Intergenic
hsa-miRNA-99a-AT	chr21	-	17911409	17911489	Intergenic

## Sheet: lv1_raw
miRNA-AT	Chr	Strand	Start	End	Genic region
hsa-let-7a-1-AT	chr9	-	96938239	96938318	Exon
hsa-let-7a-2-AT	chr11	+	122017230	122017301	Intergenic
hsa-let-7a-3-AT	chr22	-	46508629	46508702	Intergenic
hsa-let-7b-AT	chr22	-	46509566	46509648	Intergenic
hsa-let-7c-AT	chr21	-	17912148	17912231	Intergenic
hsa-let-7d-AT	chr9	-	96941116	96941202	Intron
hsa-let-7e-AT	chr19	-	52196039	52196117	ncRNA
hsa-let-7f-1-AT	chr9	-	96938629	96938715	Exon
hsa-let-7f-2-AT	chrX	+	53584153	53584235	Intergenic
hsa-let-7g-AT	chr3	+	52302294	52302377	Intergenic
hsa-let-7i-AT	chr12	-	62997466	62997549	Exon
hsa-miRNA-1-1-AT	chr20	-	61151513	61151583	Exon
hsa-miRNA-1-2-AT	chr18	+	19408965	19409049	Intron
hsa-miRNA-100-AT	chr11	+	122022937	122023016	Intergenic
hsa-miRNA-101-1-AT	chr1	+	65524117	65524191	Exon
hsa-miRNA-101-2-AT	chr9	-	4850297	4850375	Downstream
hsa-miRNA-103a-1-AT	chr5	+	167987901	167987978	Intergenic
hsa-miRNA-103a-2-AT	chr20	-	3898141	3898218	Exon
hsa-miRNA-105-1-AT	chrX	+	151560691	151560771	Intergenic
hsa-miRNA-105-2-AT	chrX	+	151562884	151562964	Intergenic
hsa-miRNA-106a-AT	chrX	+	133304228	133304308	Intergenic
hsa-miRNA-106b-AT	chr7	+	99691616	99691697	3'UTR
hsa-miRNA-107-AT	chr10	+	91352504	91352584	Exon
hsa-miRNA-10b-AT	chr2	-	177015031	177015140	Intergenic
hsa-miRNA-1179-AT	chr15	-	89151338	89151428	Exon
hsa-miRNA-1185-1-AT	chr14	-	101509314	101509399	Intergenic
hsa-miRNA-1185-2-AT	chr14	-	101510535	101510620	Intergenic
hsa-miRNA-122-AT	chr18	-	56118306	56118390	Intergenic
hsa-miRNA-124-2-AT	chr8	-	65291706	65291814	Intergenic
hsa-miRNA-1246-AT	chr2	+	177465708	177465780	Intron
hsa-miRNA-1249-AT	chr22	+	45596835	45596900	Intergenic
hsa-miRNA-1254-1-AT	chr10	-	70519075	70519171	Exon
hsa-miRNA-1254-2-AT	chr10	-	23682334	23682396	Intergenic
hsa-miRNA-1255a-AT	chr4	+	102251459	102251571	Intergenic
hsa-miRNA-1255b-1-AT	chr4	+	36427988	36428050	Intergenic
hsa-miRNA-1255b-2-AT	chr1	-	167967898	167967964	Intergenic
hsa-miRNA-125a-AT	chr19	-	52196507	52196592	ncRNA
hsa-miRNA-125b-1-AT	chr11	+	121970465	121970552	Intergenic
hsa-miRNA-125b-2-AT	chr21	-	17962557	17962645	Intergenic
hsa-miRNA-126-AT	chr9	-	139565054	139565138	Exon
hsa-miRNA-1260a-AT	chr14	-	77732561	77732633	ncRNA
hsa-miRNA-1262-AT	chr1	+	68649201	68649293	Intron
hsa-miRNA-1266-AT	chr15	+	52569314	52569397	Intergenic
hsa-miRNA-1268a-AT	chr15	+	22513229	22513280	Intergenic
hsa-miRNA-1268b-AT	chr17	-	78072627	78072676	Intergenic
hsa-miRNA-1269a-AT	chr4	-	67142542	67142646	Intergenic
hsa-miRNA-1269b-AT	chr17	+	12820585	12820659	Intron
hsa-miRNA-127-AT	chr14	-	101349316	101349412	ncRNA
hsa-miRNA-1271-AT	chr5	-	175794949	175795034	Exon
hsa-miRNA-1272-AT	chr15	+	65054586	65054714	Intergenic
hsa-miRNA-1273c-AT	chr6	-	155174494	155174570	Intergenic
hsa-miRNA-1273d-AT	chr1	-	10287776	10287861	Intergenic
hsa-miRNA-1273f-AT	chr1	-	53394346	53394444	Intergenic
hsa-miRNA-1275-AT	chr6	+	33967749	33967828	Intergenic
hsa-miRNA-1276-AT	chr15	+	86313727	86313809	Exon
hsa-miRNA-1277-AT	chrX	-	117520357	117520434	Intergenic
hsa-miRNA-1278-AT	chr1	-	193105633	193105713	Intergenic
hsa-miRNA-128-1-AT	chr2	-	136422967	136423048	Intergenic
hsa-miRNA-128-2-AT	chr3	-	35785968	35786051	Intergenic
hsa-miRNA-1283-1-AT	chr19	-	54191735	54191821	Intergenic
hsa-miRNA-1284-AT	chr3	+	71591121	71591240	Intergenic
hsa-miRNA-1285-1-AT	chr7	+	91833329	91833412	Intergenic
hsa-miRNA-1286-AT	chr22	+	20236657	20236734	Intergenic
hsa-miRNA-1287-AT	chr10	+	100154975	100155064	Intergenic
hsa-miRNA-129-1-AT	chr7	-	127847925	127847996	Intergenic
hsa-miRNA-129-2-AT	chr11	-	43602944	43603033	Intergenic
hsa-miRNA-1290-AT	chr1	+	19223565	19223642	Intergenic
hsa-miRNA-1291-AT	chr12	+	49048227	49048313	Intergenic
hsa-miRNA-1294-AT	chr5	-	153726666	153726807	Intron
hsa-miRNA-1295a-AT	chr1	+	171070869	171070947	Intron
hsa-miRNA-1297-AT	chr13	+	54886107	54886183	Exon
hsa-miRNA-1299-AT	chr9	+	69002239	69002321	Intergenic
hsa-miRNA-1301-AT	chr2	+	25551509	25551590	Intergenic
hsa-miRNA-1303-AT	chr5	-	154065336	154065421	Intron
hsa-miRNA-1304-AT	chr11	+	93466840	93466930	3'UTR
hsa-miRNA-1307-AT	chr10	+	105154010	105154158	Intergenic
hsa-miRNA-130a-AT	chr11	-	57408671	57408759	Exon
hsa-miRNA-130b-AT	chr22	-	22007593	22007674	Intergenic
hsa-miRNA-1323-AT	chr19	-	54175222	54175294	Intergenic
hsa-miRNA-133a-1-AT	chr18	+	19405659	19405746	Intron
hsa-miRNA-133a-2-AT	chr20	-	61162119	61162220	Intergenic
hsa-miRNA-133b-AT	chr6	-	52013721	52013839	Exon
hsa-miRNA-134-AT	chr14	-	101521024	101521096	Upstream
hsa-miRNA-135a-1-AT	chr3	+	52328235	52328324	ncRNA
hsa-miRNA-135b-AT	chr1	+	205417430	205417526	Exon
hsa-miRNA-136-AT	chr14	-	101351039	101351120	ncRNA
hsa-miRNA-137-AT	chr1	+	98511626	98511727	Exon
hsa-miRNA-138-1-AT	chr3	-	44155704	44155802	Intergenic
hsa-miRNA-138-2-AT	chr16	-	56892430	56892513	Intergenic
hsa-miRNA-139-AT	chr11	+	72326107	72326174	Intron
hsa-miRNA-140-AT	chr16	-	69966984	69967083	Intergenic
hsa-miRNA-141-AT	chr12	-	7073260	7073354	Intergenic
hsa-miRNA-142-AT	chr17	+	56408593	56408679	Exon
hsa-miRNA-143-AT	chr5	-	148808481	148808586	Exon
hsa-miRNA-145-AT	chr5	-	148810209	148810296	Exon
hsa-miRNA-1468-AT	chrX	+	63005882	63005967	Intergenic
hsa-miRNA-146a-AT	chr5	-	159912359	159912457	Intergenic
hsa-miRNA-146b-AT	chr10	-	104196269	104196341	Intergenic
hsa-miRNA-147b-AT	chr15	-	45725248	45725327	Exon
hsa-miRNA-148a-AT	chr7	+	25989539	25989606	Intergenic
hsa-miRNA-148b-AT	chr12	-	54731000	54731098	Intergenic
hsa-miRNA-151a-AT	chr8	+	141742663	141742752	Intergenic
hsa-miRNA-151b-AT	chr14	+	100575756	100575851	Intron
hsa-miRNA-152-AT	chr17	+	46114527	46114613	Intergenic
hsa-miRNA-153-1-AT	chr2	+	220158833	220158922	Intergenic
hsa-miRNA-153-2-AT	chr7	+	157367028	157367114	Intergenic
hsa-miRNA-154-AT	chr14	-	101526092	101526175	Exon
hsa-miRNA-155-AT	chr21	-	26946292	26946356	Exon
hsa-miRNA-15b-AT	chr3	-	160122376	160122473	Intron
hsa-miRNA-17-AT	chr13	-	92002859	92002942	Intergenic
hsa-miRNA-181a-1-AT	chr1	+	198828173	198828282	Intergenic
hsa-miRNA-181a-2-AT	chr9	-	127454721	127454830	Intron
hsa-miRNA-181b-1-AT	chr1	+	198828002	198828111	Intergenic
hsa-miRNA-181b-2-AT	chr9	-	127455989	127456077	Intron
hsa-miRNA-181c-AT	chr19	-	13985513	13985622	Intergenic
hsa-miRNA-181d-AT	chr19	-	13985689	13985825	Intergenic
hsa-miRNA-182-AT	chr7	+	129410223	129410332	Exon
hsa-miRNA-1827-AT	chr12	-	100583662	100583727	Intron
hsa-miRNA-183-AT	chr7	+	129414745	129414854	Intron
hsa-miRNA-184-AT	chr15	-	79502130	79502213	Exon
hsa-miRNA-186-AT	chr1	+	71533314	71533399	Downstream
hsa-miRNA-187-AT	chr18	+	33484781	33484889	Intergenic
hsa-miRNA-188-AT	chrX	-	49768109	49768194	Intergenic
hsa-miRNA-18a-AT	chr13	-	92003005	92003075	Intergenic
hsa-miRNA-18b-AT	chrX	+	133304071	133304141	Intergenic
hsa-miRNA-190a-AT	chr15	-	63116156	63116240	Intergenic
hsa-miRNA-190b-AT	chr1	+	154166141	154166219	Intergenic
hsa-miRNA-191-AT	chr3	+	49058051	49058142	Exon
hsa-miRNA-1910-AT	chr16	+	85775227	85775306	Intergenic
hsa-miRNA-1912-AT	chrX	-	113886019	113886098	Intergenic
hsa-miRNA-192-AT	chr11	+	64658609	64658718	Exon
hsa-miRNA-193a-AT	chr17	-	29887015	29887102	Intergenic
hsa-miRNA-193b-AT	chr16	-	14397824	14397906	Intergenic
hsa-miRNA-194-1-AT	chr1	+	220291499	220291583	Intron
hsa-miRNA-194-2-AT	chr11	+	64658827	64658911	Exon
hsa-miRNA-195-AT	chr17	+	6920934	6921020	ncRNA
hsa-miRNA-196a-1-AT	chr17	+	46709852	46709921	Exon
hsa-miRNA-196a-2-AT	chr12	-	54385522	54385631	Exon
hsa-miRNA-1973-AT	chr4	-	117220881	117220924	Intron
hsa-miRNA-199a-1-AT	chr19	+	10928102	10928172	Intron
hsa-miRNA-199a-2-AT	chr1	+	172113675	172113784	Intron
hsa-miRNA-199b-AT	chr9	+	131007000	131007109	Intron
hsa-miRNA-19b-1-AT	chr13	-	92003446	92003532	Intergenic
hsa-miRNA-200a-AT	chr1	-	1103243	1103332	Intron
hsa-miRNA-200c-AT	chr12	-	7072862	7072929	Intergenic
hsa-miRNA-202-AT	chr10	+	135061015	135061124	Exon
hsa-miRNA-205-AT	chr1	-	209605478	209605587	Intergenic
hsa-miRNA-206-AT	chr6	-	52009147	52009232	Intron
hsa-miRNA-208a-AT	chr14	+	23857805	23857875	Intergenic
hsa-miRNA-208b-AT	chr14	+	23887196	23887272	Exon
hsa-miRNA-20a-AT	chr13	-	92003319	92003389	Intergenic
hsa-miRNA-21-AT	chr17	-	57918627	57918698	Exon
hsa-miRNA-211-AT	chr15	+	31357235	31357344	Intergenic
hsa-miRNA-2110-AT	chr10	+	115933864	115933938	Intergenic
hsa-miRNA-2116-AT	chr15	+	59463382	59463461	Exon
hsa-miRNA-214-AT	chr1	+	172107938	172108047	Intron
hsa-miRNA-215-AT	chr1	+	220291195	220291304	Intron
hsa-miRNA-216a-AT	chr2	+	56216085	56216194	Intron
hsa-miRNA-216b-AT	chr2	+	56227849	56227930	Intron
hsa-miRNA-218-1-AT	chr4	-	20529898	20530007	Intergenic
hsa-miRNA-218-2-AT	chr5	+	168195151	168195260	Intron
hsa-miRNA-219a-1-AT	chr6	-	33175612	33175721	Exon
hsa-miRNA-22-AT	chr17	+	1617197	1617281	Exon
hsa-miRNA-221-AT	chrX	+	45605585	45605694	Exon
hsa-miRNA-222-AT	chrX	+	45606421	45606530	Exon
hsa-miRNA-223-AT	chrX	-	65238712	65238821	Exon
hsa-miRNA-224-AT	chrX	+	151127050	151127130	Exon
hsa-miRNA-2278-AT	chr9	-	97572244	97572339	Intergenic
hsa-miRNA-23b-AT	chr9	-	97847490	97847586	Downstream
hsa-miRNA-23c-AT	chrX	+	20035206	20035305	Intergenic
hsa-miRNA-24-2-AT	chr19	+	13947101	13947173	Exon
hsa-miRNA-25-AT	chr7	+	99691183	99691266	3'UTR
hsa-miRNA-2681-AT	chr13	+	102619992	102620096	Intergenic
hsa-miRNA-2682-AT	chr1	+	98510798	98510907	Exon
hsa-miRNA-26a-1-AT	chr3	-	38010895	38010971	Intergenic
hsa-miRNA-26a-2-AT	chr12	+	58218392	58218475	3'UTR
hsa-miRNA-26b-AT	chr2	-	219267369	219267445	Intergenic
hsa-miRNA-27a-AT	chr19	+	13947254	13947331	Exon
hsa-miRNA-27b-AT	chr9	-	97847727	97847823	Exon
hsa-miRNA-28-AT	chr3	-	188406569	188406654	Intergenic
hsa-miRNA-296-AT	chr20	+	57392670	57392749	Intergenic
hsa-miRNA-299-AT	chr14	-	101490131	101490193	Intergenic
hsa-miRNA-29b-1-AT	chr7	+	130562218	130562298	Exon
hsa-miRNA-29b-2-AT	chr1	+	207975788	207975868	Exon
hsa-miRNA-29c-AT	chr1	+	207975197	207975284	Exon
hsa-miRNA-301a-AT	chr17	+	57228497	57228582	Intergenic
hsa-miRNA-301b-AT	chr22	-	22007270	22007347	Intergenic
hsa-miRNA-302a-AT	chr4	+	113569339	113569407	Intron
hsa-miRNA-302b-AT	chr4	+	113569641	113569713	Intron
hsa-miRNA-302c-AT	chr4	+	113569519	113569586	Intron
hsa-miRNA-302d-AT	chr4	+	113569160	113569227	Intron
hsa-miRNA-302e-AT	chr11	-	7255997	7256068	Intergenic
hsa-miRNA-30a-AT	chr6	+	72113254	72113324	Intergenic
hsa-miRNA-30b-AT	chr8	+	135812763	135812850	Intergenic
hsa-miRNA-30c-1-AT	chr1	-	41222956	41223044	Intergenic
hsa-miRNA-30c-2-AT	chr6	+	72086663	72086734	Intergenic
hsa-miRNA-30d-AT	chr8	+	135817119	135817188	Intergenic
hsa-miRNA-30e-AT	chr1	-	41220027	41220118	Intergenic
hsa-miRNA-31-AT	chr9	+	21512114	21512184	Intergenic
hsa-miRNA-3117-AT	chr1	-	67094123	67094200	Exon
hsa-miRNA-3123-AT	chr1	-	241295572	241295646	Intron
hsa-miRNA-3127-AT	chr2	-	97464015	97464090	Intergenic
hsa-miRNA-3131-AT	chr2	+	219923410	219923472	Intergenic
hsa-miRNA-3135a-AT	chr3	-	20179057	20179133	Intergenic
hsa-miRNA-3135b-AT	chr6	+	32717689	32717756	Intergenic
hsa-miRNA-3138-AT	chr4	+	10080235	10080316	Intergenic
hsa-miRNA-3141-AT	chr5	+	153975572	153975632	Intron
hsa-miRNA-3144-AT	chr6	-	120336325	120336403	Intergenic
hsa-miRNA-3147-AT	chr7	-	57472731	57472796	Intergenic
hsa-miRNA-3149-AT	chr8	+	77879004	77879086	Intergenic
hsa-miRNA-3150b-AT	chr8	+	96085139	96085224	Intron
hsa-miRNA-3154-AT	chr9	+	131007226	131007309	Intron
hsa-miRNA-3159-AT	chr11	-	18409334	18409407	Intergenic
hsa-miRNA-3162-AT	chr11	+	59362550	59362631	Intergenic
hsa-miRNA-3168-AT	chr13	+	41675155	41675236	Intron
hsa-miRNA-3175-AT	chr15	-	93447629	93447705	Intergenic
hsa-miRNA-3176-AT	chr16	-	593277	593366	Exon
hsa-miRNA-3178-AT	chr16	+	2581923	2582006	3'UTR
hsa-miRNA-3182-AT	chr16	-	83541951	83542013	Intergenic
hsa-miRNA-3190-AT	chr19	-	47730199	47730278	Exon
hsa-miRNA-3196-AT	chr20	-	61870131	61870194	Intergenic
hsa-miRNA-32-AT	chr9	+	111808509	111808578	Intergenic
hsa-miRNA-3200-AT	chr22	-	31127544	31127628	Intergenic
hsa-miRNA-320a-AT	chr8	+	22102475	22102556	Exon
hsa-miRNA-320b-1-AT	chr1	-	117214371	117214449	Intergenic
hsa-miRNA-320c-2-AT	chr18	-	21901650	21901699	Intron
hsa-miRNA-320d-2-AT	chrX	+	140008337	140008384	Intergenic
hsa-miRNA-320e-AT	chr19	+	47212550	47212602	Exon
hsa-miRNA-323a-AT	chr14	-	101492069	101492154	Upstream
hsa-miRNA-326-AT	chr11	+	75046136	75046230	Intergenic
hsa-miRNA-328-AT	chr16	+	67236224	67236298	Intron
hsa-miRNA-329-2-AT	chr14	-	101493437	101493520	Intergenic
hsa-miRNA-330-AT	chr19	+	46142252	46142345	Intron
hsa-miRNA-331-AT	chr12	-	95702196	95702289	Intron
hsa-miRNA-335-AT	chr7	-	130135952	130136045	ncRNA
hsa-miRNA-337-AT	chr14	-	101340830	101340922	Exon
hsa-miRNA-33a-AT	chr22	-	42296948	42297016	Exon
hsa-miRNA-340-AT	chr5	+	179442303	179442397	Intron
hsa-miRNA-342-AT	chr14	-	100575992	100576090	Upstream
hsa-miRNA-345-AT	chr14	-	100774196	100774293	Intergenic
hsa-miRNA-346-AT	chr10	+	88024451	88024545	Intergenic
hsa-miRNA-34a-AT	chr1	+	9211727	9211836	Exon
hsa-miRNA-34c-AT	chr11	-	111384164	111384240	Exon
hsa-miRNA-3605-AT	chr1	+	33797994	33798093	Exon
hsa-miRNA-3606-AT	chr2	-	189860356	189860418	Exon
hsa-miRNA-3609-AT	chr7	-	98479273	98479352	Intergenic
hsa-miRNA-361-AT	chrX	+	85158641	85158712	Intergenic
hsa-miRNA-3610-AT	chr8	+	117886967	117887039	ncRNA
hsa-miRNA-3611-AT	chr10	+	35368526	35368608	Intergenic
hsa-miRNA-3612-AT	chr12	-	128778637	128778723	Intergenic
hsa-miRNA-3614-AT	chr17	+	54968631	54968716	Intron
hsa-miRNA-3616-AT	chr20	-	45795609	45795700	Exon
hsa-miRNA-362-AT	chrX	-	49773572	49773636	Intergenic
hsa-miRNA-3620-AT	chr1	-	228284964	228285042	ncRNA
hsa-miRNA-3622a-AT	chr8	-	27559194	27559276	ncRNA
hsa-miRNA-3652-AT	chr12	-	104324203	104324333	Exon
hsa-miRNA-3656-AT	chr11	-	118889654	118889722	Exon
hsa-miRNA-365a-AT	chr16	-	14403142	14403228	Intergenic
hsa-miRNA-365b-AT	chr17	-	29902430	29902540	Intergenic
hsa-miRNA-3663-AT	chr10	+	118927189	118927285	Exon
hsa-miRNA-3664-AT	chr11	+	70718375	70718473	Intergenic
hsa-miRNA-3667-AT	chr22	+	49937041	49937114	Intergenic
hsa-miRNA-369-AT	chr14	-	101531935	101532004	Exon
hsa-miRNA-370-AT	chr14	-	101377476	101377550	Intergenic
hsa-miRNA-371a-AT	chr19	-	54290929	54290995	ncRNA
hsa-miRNA-372-AT	chr19	-	54291144	54291210	ncRNA
hsa-miRNA-373-AT	chr19	-	54291959	54292027	Exon
hsa-miRNA-374a-AT	chrX	+	73507121	73507192	Intergenic
hsa-miRNA-374b-AT	chrX	+	73438382	73438453	Intergenic
hsa-miRNA-376a-1-AT	chr14	-	101507119	101507186	Intergenic
hsa-miRNA-376b-AT	chr14	-	101506773	101506872	Intergenic
hsa-miRNA-376c-AT	chr14	-	101506027	101506092	Intergenic
hsa-miRNA-377-AT	chr14	-	101528387	101528455	Exon
hsa-miRNA-378a-AT	chr5	-	149112388	149112453	Intergenic
hsa-miRNA-378b-AT	chr3	-	10371913	10371969	Intron
hsa-miRNA-378c-AT	chr10	+	132760851	132760931	Intergenic
hsa-miRNA-378d-1-AT	chr4	+	5925002	5925055	Intergenic
hsa-miRNA-378d-2-AT	chr8	+	94928250	94928347	Intron
hsa-miRNA-378e-AT	chr5	-	169455492	169455570	Intergenic
hsa-miRNA-378f-AT	chr1	-	24255560	24255637	Intron
hsa-miRNA-378g-AT	chr1	+	95211416	95211456	Intergenic
hsa-miRNA-378h-AT	chr5	-	154209018	154209100	Intron
hsa-miRNA-378i-AT	chr22	+	42319226	42319301	Exon
hsa-miRNA-378j-AT	chr17	+	35974976	35975084	Intergenic
hsa-miRNA-379-AT	chr14	-	101488403	101488469	Intergenic
hsa-miRNA-380-AT	chr14	-	101491354	101491414	ncRNA
hsa-miRNA-381-AT	chr14	-	101512257	101512331	Intergenic
hsa-miRNA-382-AT	chr14	-	101520643	101520718	ncRNA
hsa-miRNA-383-AT	chr8	+	14710947	14711019	Intergenic
hsa-miRNA-3907-AT	chr7	+	151130575	151130725	Exon
hsa-miRNA-3909-AT	chr22	-	35731633	35731751	Intergenic
hsa-miRNA-3910-1-AT	chr9	-	94398533	94398643	3'UTR
hsa-miRNA-3911-AT	chr9	+	130452966	130453074	Exon
hsa-miRNA-3916-AT	chr1	+	247365269	247365362	Exon
hsa-miRNA-3926-1-AT	chr8	+	12584741	12584813	Intergenic
hsa-miRNA-3928-AT	chr22	+	31556048	31556105	Upstream
hsa-miRNA-3929-AT	chr18	+	33514051	33514105	Intron
hsa-miRNA-3934-AT	chr6	-	33665905	33666011	Exon
hsa-miRNA-3940-AT	chr19	+	6416421	6416522	Exon
hsa-miRNA-409-AT	chr14	-	101531637	101531715	Exon
hsa-miRNA-410-AT	chr14	-	101532249	101532328	Exon
hsa-miRNA-411-AT	chr14	-	101489662	101489757	Intergenic
hsa-miRNA-412-AT	chr14	-	101531784	101531874	Exon
hsa-miRNA-421-AT	chrX	+	73438212	73438296	Intergenic
hsa-miRNA-423-AT	chr17	-	28444097	28444190	Exon
hsa-miRNA-424-AT	chrX	+	133680644	133680741	Exon
hsa-miRNA-425-AT	chr3	+	49057581	49057667	Exon
hsa-miRNA-4271-AT	chr3	-	49311553	49311619	ncRNA
hsa-miRNA-4279-AT	chr5	+	31936208	31936265	Exon
hsa-miRNA-4284-AT	chr7	-	73125647	73125727	Intron
hsa-miRNA-4286-AT	chr8	-	10524488	10524580	Intron
hsa-miRNA-4289-AT	chr9	+	91360751	91360820	Intergenic
hsa-miRNA-429-AT	chr1	-	1104385	1104467	Intron
hsa-miRNA-4298-AT	chr11	+	1880694	1880766	Exon
hsa-miRNA-4306-AT	chr13	-	100295313	100295403	Intergenic
hsa-miRNA-431-AT	chr14	-	101347344	101347457	ncRNA
hsa-miRNA-432-AT	chr14	-	101350820	101350913	ncRNA
hsa-miRNA-4328-AT	chrX	+	78156691	78156746	Intergenic
hsa-miRNA-433-AT	chr14	-	101348223	101348315	ncRNA
hsa-miRNA-4417-AT	chr1	-	5624131	5624203	Intergenic
hsa-miRNA-4419a-AT	chr1	+	23384351	23384427	Exon
hsa-miRNA-4419b-AT	chr12	-	128729051	128729118	Intergenic
hsa-miRNA-4421-AT	chr1	-	51525509	51525577	Intergenic
hsa-miRNA-4423-AT	chr1	-	85599477	85599556	Intergenic
hsa-miRNA-4425-AT	chr1	-	25349994	25350077	Intergenic
hsa-miRNA-4429-AT	chr2	+	11680731	11680803	Exon
hsa-miRNA-4430-AT	chr2	-	33643583	33643631	Intron
hsa-miRNA-4431-AT	chr2	+	52929660	52929753	Intergenic
hsa-miRNA-4442-AT	chr3	+	25706364	25706430	Exon
hsa-miRNA-4443-AT	chr3	-	48238054	48238106	Intergenic
hsa-miRNA-4444-2-AT	chr3	-	75263627	75263700	Intergenic
hsa-miRNA-4446-AT	chr3	-	113313723	113313789	Intergenic
hsa-miRNA-4448-AT	chr3	-	183604588	183604673	Intergenic
hsa-miRNA-4451-AT	chr4	-	86643621	86643686	Intron
hsa-miRNA-4452-AT	chr4	+	87463635	87463705	Intergenic
hsa-miRNA-4453-AT	chr4	-	153457580	153457668	Exon
hsa-miRNA-4455-AT	chr4	+	185859537	185859594	Intron
hsa-miRNA-4458-AT	chr5	-	8461038	8461112	Intergenic
hsa-miRNA-4459-AT	chr5	+	53371348	53371413	Intergenic
hsa-miRNA-4464-AT	chr6	-	91022461	91022552	Intergenic
hsa-miRNA-4472-2-AT	chr12	+	116866057	116866123	Intergenic
hsa-miRNA-4476-AT	chr9	+	36893459	36893528	Intergenic
hsa-miRNA-4478-AT	chr9	+	124882361	124882446	Exon
hsa-miRNA-4484-AT	chr10	-	127508309	127508391	Intron
hsa-miRNA-4487-AT	chr11	-	47422521	47422593	Intron
hsa-miRNA-449a-AT	chr5	+	54466360	54466450	Intergenic
hsa-miRNA-449b-AT	chr5	+	54466474	54466570	Intergenic
hsa-miRNA-449c-AT	chr5	+	54468090	54468181	Intergenic
hsa-miRNA-4500-AT	chr13	+	88270920	88270995	Intergenic
hsa-miRNA-4502-AT	chr13	-	115039303	115039383	Exon
hsa-miRNA-450a-2-AT	chrX	+	133674538	133674637	Intergenic
hsa-miRNA-4510-AT	chr15	-	36219057	36219124	Intron
hsa-miRNA-4511-AT	chr15	+	66011584	66011670	Intergenic
hsa-miRNA-4512-AT	chr15	+	66789296	66789372	Intergenic
hsa-miRNA-4518-AT	chr16	-	30515240	30515322	Intergenic
hsa-miRNA-451a-AT	chr17	+	27188387	27188458	Downstream
hsa-miRNA-452-AT	chrX	+	151128100	151128184	Intergenic
hsa-miRNA-4521-AT	chr17	-	8090263	8090322	Exon
hsa-miRNA-4525-AT	chr17	+	80626109	80626183	Intergenic
hsa-miRNA-4531-AT	chr19	+	45156956	45157002	Intron
hsa-miRNA-4532-AT	chr20	-	56470450	56470500	Intron
hsa-miRNA-4536-1-AT	chrX	+	55477928	55478015	ncRNA
hsa-miRNA-454-AT	chr17	+	57215119	57215233	Intergenic
hsa-miRNA-455-AT	chr9	-	116971714	116971809	Intergenic
hsa-miRNA-4635-AT	chr5	+	1063011	1063089	Intergenic
hsa-miRNA-4662a-AT	chr8	-	125834227	125834293	ncRNA
hsa-miRNA-4695-AT	chr1	+	19209696	19209769	Intergenic
hsa-miRNA-4707-AT	chr14	+	23426159	23426238	Intergenic
hsa-miRNA-4708-AT	chr14	+	65801835	65801901	Intron
hsa-miRNA-4710-AT	chr14	+	105144031	105144086	Intron
hsa-miRNA-4716-AT	chr15	+	49461267	49461350	Intron
hsa-miRNA-4724-AT	chr17	-	29861901	29861989	Intergenic
hsa-miRNA-4732-AT	chr17	+	27188673	27188748	Downstream
hsa-miRNA-4738-AT	chr17	+	73780602	73780688	ncRNA
hsa-miRNA-4750-AT	chr19	-	50391432	50391487	3'UTR
hsa-miRNA-4772-AT	chr2	-	103048749	103048826	Intergenic
hsa-miRNA-4791-AT	chr3	+	19356340	19356423	Intron
hsa-miRNA-4792-AT	chr3	+	24562853	24562926	Exon
hsa-miRNA-483-AT	chr11	+	2155364	2155439	Intron
hsa-miRNA-485-AT	chr14	-	101521756	101521828	Intergenic
hsa-miRNA-486-AT	chr8	+	41517959	41518026	ncRNA
hsa-miRNA-487a-AT	chr14	-	101518783	101518862	Intergenic
hsa-miRNA-487b-AT	chr14	-	101512792	101512875	Intergenic
hsa-miRNA-488-AT	chr1	+	176998499	176998581	Intergenic
hsa-miRNA-490-AT	chr7	-	136587914	136588041	Intron
hsa-miRNA-493-AT	chr14	-	101335397	101335485	Exon
hsa-miRNA-494-AT	chr14	-	101495971	101496051	Intergenic
hsa-miRNA-495-AT	chr14	-	101500092	101500173	Intergenic
hsa-miRNA-496-AT	chr14	-	101526910	101527011	Exon
hsa-miRNA-497-AT	chr17	+	6921230	6921341	ncRNA
hsa-miRNA-499a-AT	chr20	-	33578179	33578300	Exon
hsa-miRNA-5001-AT	chr2	+	233415184	233415283	ncRNA
hsa-miRNA-500a-AT	chrX	-	49773039	49773122	Intergenic
hsa-miRNA-500b-AT	chrX	-	49775280	49775358	Intergenic
hsa-miRNA-501-AT	chrX	-	49774330	49774413	Intergenic
hsa-miRNA-5010-AT	chr17	-	40666206	40666325	Exon
hsa-miRNA-502-AT	chrX	-	49779206	49779291	Intergenic
hsa-miRNA-503-AT	chrX	+	133680358	133680428	Exon
hsa-miRNA-504-AT	chrX	+	137749872	137749954	Intergenic
hsa-miRNA-505-AT	chrX	+	139006307	139006390	Intergenic
hsa-miRNA-506-AT	chrX	+	146312238	146312361	Intron
hsa-miRNA-507-AT	chrX	+	146312502	146312595	Intron
hsa-miRNA-508-AT	chrX	+	146318431	146318545	Exon
hsa-miRNA-5088-AT	chr19	-	50185374	50185452	Intergenic
hsa-miRNA-5090-AT	chr7	-	102106189	102106273	3'UTR
hsa-miRNA-5096-AT	chr4	-	79741906	79741975	Intergenic
hsa-miRNA-510-AT	chrX	+	146353853	146353926	Exon
hsa-miRNA-5100-AT	chr10	-	43493011	43493129	Intron
hsa-miRNA-513b-AT	chrX	+	146280562	146280645	Intron
hsa-miRNA-513c-AT	chrX	+	146271222	146271305	Intron
hsa-miRNA-514b-AT	chrX	+	146331669	146331748	Exon
hsa-miRNA-516a-2-AT	chr19	-	54264387	54264476	Upstream
hsa-miRNA-516b-1-AT	chr19	-	54240099	54240188	Intergenic
hsa-miRNA-517b-AT	chr19	-	54224330	54224396	Intergenic
hsa-miRNA-517c-AT	chr19	-	54244567	54244661	Intergenic
hsa-miRNA-5187-AT	chr1	-	161196976	161197051	Exon
hsa-miRNA-518e-AT	chr19	-	54233092	54233179	Intergenic
hsa-miRNA-5193-AT	chr3	+	49843570	49843678	Exon
hsa-miRNA-5196-AT	chr19	-	35836416	35836530	Exon
hsa-miRNA-519a-1-AT	chr19	-	54255651	54255735	Intergenic
hsa-miRNA-519c-AT	chr19	-	54189723	54189809	Intergenic
hsa-miRNA-519d-AT	chr19	-	54216601	54216688	Exon
hsa-miRNA-520b-AT	chr19	-	54204481	54204541	Exon
hsa-miRNA-520d-AT	chr19	-	54223350	54223436	Upstream
hsa-miRNA-520f-AT	chr19	-	54185413	54185499	Intergenic
hsa-miRNA-522-AT	chr19	-	54254465	54254551	Intergenic
hsa-miRNA-523-AT	chr19	-	54201639	54201725	Exon
hsa-miRNA-524-AT	chr19	-	54214256	54214342	Exon
hsa-miRNA-526b-AT	chr19	-	54197647	54197729	Exon
hsa-miRNA-539-AT	chr14	-	101513658	101513735	Intergenic
hsa-miRNA-541-AT	chr14	-	101530832	101530915	Exon
hsa-miRNA-542-AT	chrX	+	133675371	133675467	Intergenic
hsa-miRNA-543-AT	chr14	-	101498324	101498401	Intergenic
hsa-miRNA-544b-AT	chr3	-	124451286	124451363	Exon
hsa-miRNA-545-AT	chrX	+	73506939	73507044	Intergenic
hsa-miRNA-548a-1-AT	chr6	-	18572015	18572111	Intergenic
hsa-miRNA-548a-2-AT	chr6	-	135560298	135560394	Intron
hsa-miRNA-548a-3-AT	chr8	+	105496597	105496693	Exon
hsa-miRNA-548ab-AT	chr3	+	103242877	103242960	Intron
hsa-miRNA-548ac-AT	chr1	+	117102646	117102733	Intron
hsa-miRNA-548ad-AT	chr2	-	35696471	35696552	Intergenic
hsa-miRNA-548ae-1-AT	chr2	-	185243702	185243771	Intergenic
hsa-miRNA-548ae-2-AT	chr5	+	57825870	57825936	Exon
hsa-miRNA-548ag-1-AT	chr4	-	61788337	61788402	Intergenic
hsa-miRNA-548ag-2-AT	chr20	-	59139620	59139683	Intergenic
hsa-miRNA-548ah-AT	chr4	-	77496704	77496779	Intron
hsa-miRNA-548ai-AT	chr6	-	99572485	99572572	Intergenic
hsa-miRNA-548aj-1-AT	chr6	+	132436332	132436403	Intron
hsa-miRNA-548aj-2-AT	chrX	+	37883148	37883239	Intron
hsa-miRNA-548ak-AT	chr10	+	12172759	12172815	Intron
hsa-miRNA-548al-AT	chr11	-	74110282	74110378	Upstream
hsa-miRNA-548am-AT	chrX	+	16645135	16645208	Intergenic
hsa-miRNA-548an-AT	chrX	-	105883044	105883126	Intergenic
hsa-miRNA-548ap-AT	chr15	-	86368866	86368961	Intergenic
hsa-miRNA-548aq-AT	chr3	+	185485635	185485692	Intergenic
hsa-miRNA-548ar-AT	chr13	-	115009980	115010036	Intergenic
hsa-miRNA-548as-AT	chr13	-	93142416	93142473	Intergenic
hsa-miRNA-548au-AT	chr9	-	96357123	96357176	Intergenic
hsa-miRNA-548av-AT	chr18	+	70520556	70520617	Intergenic
hsa-miRNA-548aw-AT	chr9	-	135821094	135821158	Intergenic
hsa-miRNA-548ax-AT	chrX	+	11336734	11336806	Intergenic
hsa-miRNA-548ay-AT	chr3	+	32547775	32547881	Intergenic
hsa-miRNA-548az-AT	chr8	-	120337411	120337505	Intergenic
hsa-miRNA-548b-AT	chr6	+	119390212	119390308	Intergenic
hsa-miRNA-548e-AT	chr10	-	112748684	112748771	Intergenic
hsa-miRNA-548f-1-AT	chr10	+	56367634	56367717	Intron
hsa-miRNA-548f-2-AT	chr2	+	213290987	213291084	Intergenic
hsa-miRNA-548f-3-AT	chr5	+	109849530	109849616	Intergenic
hsa-miRNA-548g-AT	chr4	+	148265781	148265869	Intergenic
hsa-miRNA-548h-1-AT	chr14	+	64561742	64561843	Intron
hsa-miRNA-548h-2-AT	chr16	+	11400297	11400384	Intron
hsa-miRNA-548h-3-AT	chr17	+	13446846	13446963	Intron
hsa-miRNA-548h-4-AT	chr8	+	26906370	26906480	Intergenic
hsa-miRNA-548h-5-AT	chr6	-	132113312	132113371	Intergenic
hsa-miRNA-548i-4-AT	chrX	+	83480760	83480836	Intron
hsa-miRNA-548j-AT	chr22	+	26951178	26951289	Intergenic
hsa-miRNA-548k-AT	chr11	-	70130061	70130176	Intron
hsa-miRNA-548l-AT	chr11	+	94199661	94199746	Intergenic
hsa-miRNA-548n-AT	chr7	+	34980372	34980446	Intergenic
hsa-miRNA-548o-2-AT	chr20	-	37145206	37145275	Intergenic
hsa-miRNA-548p-AT	chr5	+	100152186	100152269	Intergenic
hsa-miRNA-548q-AT	chr10	+	12767253	12767352	Intron
hsa-miRNA-548s-AT	chr2	-	11907570	11907651	Intergenic
hsa-miRNA-548v-AT	chr8	+	17539087	17539166	Intergenic
hsa-miRNA-548w-AT	chr16	-	26036558	26036631	Intergenic
hsa-miRNA-548x-AT	chr21	+	20058408	20058482	Intergenic
hsa-miRNA-548x-2-AT	chr13	+	66540462	66540561	Intron
hsa-miRNA-548y-AT	chr14	+	48230198	48230307	Intergenic
hsa-miRNA-549a-AT	chr15	+	81134319	81134414	Intron
hsa-miRNA-551a-AT	chr1	+	3477259	3477354	Intergenic
hsa-miRNA-551b-AT	chr3	-	168269642	168269737	Intergenic
hsa-miRNA-556-AT	chr1	-	162312336	162312430	Intron
hsa-miRNA-5571-AT	chr22	-	23228447	23228559	Intron
hsa-miRNA-558-AT	chr2	-	32757220	32757313	Intergenic
hsa-miRNA-5588-AT	chr3	+	184970998	184971060	Intergenic
hsa-miRNA-561-AT	chr2	-	189162219	189162315	Intergenic
hsa-miRNA-567-AT	chr3	-	111831648	111831745	Intergenic
hsa-miRNA-5684-AT	chr19	-	12897942	12898006	Exon
hsa-miRNA-5689-AT	chr6	-	10439950	10440027	Intergenic
hsa-miRNA-5699-AT	chr10	+	687629	687718	Intergenic
hsa-miRNA-5701-1-AT	chr15	-	21145581	21145662	Intergenic
hsa-miRNA-574-AT	chr4	-	38869653	38869748	Exon
hsa-miRNA-576-AT	chr4	-	110409854	110409951	Intergenic
hsa-miRNA-577-AT	chr4	-	115577915	115578010	Intergenic
hsa-miRNA-579-AT	chr5	+	32394484	32394581	Intergenic
hsa-miRNA-582-AT	chr5	+	58999432	58999529	Intergenic
hsa-miRNA-584-AT	chr5	+	148441876	148441972	Upstream
hsa-miRNA-585-AT	chr5	+	168690605	168690698	Intergenic
hsa-miRNA-590-AT	chr7	-	73605528	73605624	Exon
hsa-miRNA-592-AT	chr7	+	126698142	126698238	Intergenic
hsa-miRNA-598-AT	chr8	+	10892716	10892812	Intergenic
hsa-miRNA-599-AT	chr8	+	100548864	100548958	Intron
hsa-miRNA-600-AT	chr9	+	125873825	125873922	3'UTR
hsa-miRNA-6088-AT	chr19	-	45939912	45939962	Intron
hsa-miRNA-6124-AT	chr11	-	12185230	12185314	Intergenic
hsa-miRNA-6125-AT	chr12	-	62654140	62654235	Exon
hsa-miRNA-6127-AT	chr1	+	22959751	22959859	Intergenic
hsa-miRNA-6128-AT	chr11	-	56511349	56511457	Upstream
hsa-miRNA-6129-AT	chr17	+	47365708	47365816	Intergenic
hsa-miRNA-6130-AT	chr21	-	24451606	24451714	Intergenic
hsa-miRNA-6131-AT	chr5	-	10478149	10478257	Intergenic
hsa-miRNA-6133-AT	chr7	-	132975635	132975742	Intergenic
hsa-miRNA-6134-AT	chrX	+	28513672	28513780	Intergenic
hsa-miRNA-616-AT	chr12	+	57912946	57913042	Exon
hsa-miRNA-619-AT	chr12	+	109230684	109230782	Intergenic
hsa-miRNA-622-AT	chr13	-	90883436	90883531	Intergenic
hsa-miRNA-624-AT	chr14	+	31483852	31483948	Intergenic
hsa-miRNA-625-AT	chr14	-	65937820	65937904	Intergenic
hsa-miRNA-627-AT	chr15	+	42491768	42491864	Intergenic
hsa-miRNA-628-AT	chr15	+	55665138	55665232	Intergenic
hsa-miRNA-629-AT	chr15	+	70371711	70371807	Intergenic
hsa-miRNA-632-AT	chr17	-	30677128	30677221	Exon
hsa-miRNA-641-AT	chr19	+	40788450	40788548	Intergenic
hsa-miRNA-6499-AT	chr5	+	150901648	150901709	Intron
hsa-miRNA-6500-AT	chr1	-	51525690	51525775	Intergenic
hsa-miRNA-6503-AT	chr11	+	59976544	59976629	Intron
hsa-miRNA-6505-AT	chr12	-	48526580	48526650	Intergenic
hsa-miRNA-6507-AT	chr10	+	100684256	100684325	Intergenic
hsa-miRNA-651-AT	chrX	-	8095006	8095102	Intergenic
hsa-miRNA-6510-AT	chr17	+	39673416	39673469	Intergenic
hsa-miRNA-652-AT	chrX	-	109298557	109298654	Intergenic
hsa-miRNA-653-AT	chr7	+	93112072	93112167	Intergenic
hsa-miRNA-654-AT	chr14	-	101506556	101506636	Intergenic
hsa-miRNA-655-AT	chr14	-	101515887	101515983	Intergenic
hsa-miRNA-656-AT	chr14	-	101533061	101533138	Exon
hsa-miRNA-659-AT	chr22	+	38243685	38243781	Intron
hsa-miRNA-660-AT	chrX	-	49777849	49777945	Intergenic
hsa-miRNA-664b-AT	chrX	-	153996871	153996931	Intergenic
hsa-miRNA-665-AT	chr14	-	101341370	101341441	Exon
hsa-miRNA-6720-AT	chr6	+	1390549	1390646	ncRNA
hsa-miRNA-675-AT	chr11	+	2017989	2018061	Exon
hsa-miRNA-7-2-AT	chr15	-	89155056	89155165	Intergenic
hsa-miRNA-7-3-AT	chr19	-	4770682	4770791	Intergenic
hsa-miRNA-708-AT	chr11	+	79113066	79113153	Intergenic
hsa-miRNA-7153-AT	chr18	+	11654884	11654940	Intergenic
hsa-miRNA-744-AT	chr17	-	11985216	11985313	Intergenic
hsa-miRNA-758-AT	chr14	-	101492357	101492444	Upstream
hsa-miRNA-760-AT	chr1	-	94312388	94312467	Exon
hsa-miRNA-766-AT	chrX	+	118780701	118780811	Intergenic
hsa-miRNA-767-AT	chrX	+	151561893	151562001	Intergenic
hsa-miRNA-769-AT	chr19	-	46522190	46522307	Downstream
hsa-miRNA-7975-AT	chr19	+	55634593	55634660	Exon
hsa-miRNA-8086-AT	chr10	+	28578187	28578279	Intergenic
hsa-miRNA-873-AT	chr9	+	28888877	28888953	Intergenic
hsa-miRNA-874-AT	chr5	+	136983261	136983338	Intergenic
hsa-miRNA-876-AT	chr9	+	28863624	28863704	Intergenic
hsa-miRNA-877-AT	chr6	-	30552109	30552194	Intron
hsa-miRNA-885-AT	chr3	+	10436173	10436246	Intron
hsa-miRNA-889-AT	chr14	-	101514238	101514316	Intergenic
hsa-miRNA-9-2-AT	chr5	+	87962671	87962757	Exon
hsa-miRNA-92a-1-AT	chr13	-	92003568	92003645	Intergenic
hsa-miRNA-92a-2-AT	chrX	+	133303568	133303642	Intergenic
hsa-miRNA-93-AT	chr7	+	99691391	99691470	3'UTR
hsa-miRNA-942-AT	chr1	-	117637265	117637350	Intergenic
hsa-miRNA-944-AT	chr3	-	189547711	189547798	Intergenic
hsa-miRNA-95-AT	chr4	+	8007028	8007108	Exon
hsa-miRNA-96-AT	chr7	+	129414532	129414609	Exon
hsa-miRNA-98-AT	chrX	+	53583184	53583302	Intergenic
hsa-miRNA-99a-AT	chr21	-	17911409	17911489	Intergenic
