# Supplementary material for: Sense–antisense miRNA pairs constitute an elaborate reciprocal regulatory circuit
Source: HighWire-hosted journal article supplement (doi:10.1101/gr.257121.119), 2020-05-01
Supplement: Supplemental_Table_S6.xlsx [file Supplemental_Table_S6.xlsx]

## Sheet: Primers for vector construction
Supplemental Table S6. Primer sequences and gene sequences synthesized in this study.
Primer sequences used to generate miRNA expression vectors
Name	Forward primer sequence	Reverse primer sequence
mir-106b	CGCGGATCCACTGCTCTGGTAAGTGCCCAAATTG	CCGCTCGAGGACGGGAGGACAGAAAGGAAGGT
mir-107	TAAGCTTGGTACCGAGCTCGGATCCTCACCTGTGGAAACAGGATAC	TTTAAACGGGCCCTCTAGACTCGAGTACTTTATACACCTTGTATTTCAGAAAAG
mir-10b	TAAGCTTGGTACCGAGCTCGGATCCAATGAGGGAACTCATTGC	TTTAAACGGGCCCTCTAGACTCGAGGCTTCTGGAGAGGAAAAG
mir-128-1	TAAGCTTGGTACCGAGCTCGGATCCGGAACCAAATTAGGTTGTTTCAATATCGTG	TTTAAACGGGCCCTCTAGACTCGAGTCTCCCCGTCAGGCAGTC
mir-184	CGCGGATCCCGGCTCGCCGGGAAATCAAAC	CCGCTCGAGCCAAGGTCTCCTCCTGGAATCC
mir-18a	TAAGCTTGGTACCGAGCTCGGATCCACCAGTCAGAATAATGTCAAAG	TTTAAACGGGCCCTCTAGACTCGAGCAGGCCACCATCAGTTTTG
mir-26a-1	CGCGGATCCCTCCATCCTGGCTGTGCTGTGATA	CCGCTCGAGGAACTCTGGTGTTGGTGCCTCTG
mir-30d	TAAGCTTGGTACCGAGCTCGGATCCCTTTAATTATTAGCATTAACTTTATCATTTTTG	TTTAAACGGGCCCTCTAGACTCGAGGCACCCTACATTCAACTATC
mir-450a-2	TAAGCTTGGTACCGAGCTCGGATCCAAAGGTGCAAAATATTTTCC	TTTAAACGGGCCCTCTAGACTCGAGATACATGCAAAATGTTCCC
mir-451a	CGCGGATCCAGCTCTGGAGCCTGACAAGGAG	TGCTCTAGATTACAACAGGAAAGAGAAAATGTAT
mir-4521	CGCGGATCCGAGCCCCACCTGCAGGAAGTT	TGCTCTAGACCGCCGGAAAGACGCTTAGG
mir-4732	CGCGGATCCGAACCTTCTGCATCATTACGCC	TGCTCTAGAATCATCTATACTGTAGTGTCTCATCGCAAA
mir-497	CGCGGATCCATGGTCCGTCGCCTTCCAGTTG	TGCTCTAGACTCTGGCCATCAGTATTCTTGAAAC
mir-598-1	TAAGCTTGGTACCGAGCTCGGATCCGATCCTGTTTGGGTGCAG	TTTAAACGGGCCCTCTAGACTCGAGACTGATTCTTTCTGAGCTTC
mir-619	CGCGGATCCCAGTAGAGAATAGGGTGTTGCCATGTTG	CCGCTCGAGGGATTCAACGAGGACGCAGCAT
mir-769	CGCGGATCCGGGAGGAGTAGTGAGCAGCCC	TGCTCTAGAATGGCCAAAAACCCCACTGT
mir-93	CGCGGATCCTCCATGTGTCCTAGATCCTGTGCTA	CCGCTCGAGTGTCCTGTGAGGGAGACCAGAC
mir-432	TAAGCTTGGTACCGAGCTCGGATCCGTTGAGTGCTCGGTCTGGTT	TTTAAACGGGCCCTCTAGACTCGAGGAGGGCTCATCCAACACCAC
mir-409	TAAGCTTGGTACCGAGCTCGGATCCCTGGGTCTTGCACTCAACTTC	TTTAAACGGGCCCTCTAGACTCGAGCCAGAATGGTGCTGATGCC
mir-410	TAAGCTTGGTACCGAGCTCGGATCCTTGGAGTCGCTGCCTCAGT	TTTAAACGGGCCCTCTAGACTCGAGGCACAACCCTAGCATCTTCCC
mir-377	TAAGCTTGGTACCGAGCTCGGATCCCCAACCATGTTCTGACCACTG	TTTAAACGGGCCCTCTAGACTCGAGAGCGACATCTGTTCTCATCCA
Primer sequences used to generate Renilla reporters
Name	Forward primer sequence	Reverse primer sequence
miRNA-107-AT-WT	CCGCTCGAGGACTTTGTATGTCACCAGC	ATTTGCGGCCGGTGAGGAAAAGGTCTGAG
miRNA-10b-AT-WT	CCGCTCGAGGGCGGCTGACCAGCGCCGG	ATTTGCGGCCGTCGAACGGTGGTGGCTCAGAGGAAG
miRNA-128-1-AT-WT	CCGCTCGAGGCCTAGCACAAGCCACTCAG	ATTTGCGGCCGGGTGGAACTCTGACTCCATG
miRNA-184-AT-WT	CCGCTCGAGCCAAGGTCTCCTCCTGGAATCC	ATTTGCGGCCGCGGCTCGCCGGGAAATCAAAC
miRNA-18a-AT-WT	CCGCTCGAGGCAAACAAAAACTATTAAAACACCTATATACTTGCTTG	ATTTGCGGCCGATGGTGACAGCTGCCTCG
miRNA-26a-1-AT-WT	CCGCTCGAGGAACTCTGGTGTTGGTGCCTCTG	ATTTGCGGCCGCTCCATCCTGGCTGTGCTGTGATA
miRNA-30d-AT-WT	CCGCTCGAGGACACATTTTATAGCCTCC	ATTTGCGGCCGATTAGCTGAAGATGATGAC
miRNA-450a-2-AT-WT	CCGCTCGAGGGCCTATAGTGACACAAGTC	ATTTGCGGCCGAGATAAAAGGCTAGGAGG
miRNA-451a-AT-WT	CCGCTCGAGTCTCCCTTCCAGTAGTCTGCTTCAG	ATTTGCGGCCGCTTCTGCATCATTACGCCATCTCTG
miRNA-4521-AT-WT	CCGCTCGAGGAAAGACGCTTAGGATCTTGTTTCC	ATTTGCGGCCGGTTCAGGTTCCAGAGAAGTGAGATG
miRNA-497-4732-AT-WT	CCGCTCGAGGTATTCTTGAAACTGCCCTGGAGAT	ATTTGCGGCCGCACTGCTATGTGCTCTCTTCCTTTC
miRNA-598-1-AT-WT	CCGCTCGAGGGAAAGACAAACTATGACAAAC	ATTTGCGGCCGCATTCATGATTTGATCTCCTG
miRNA-619-AT-WT	CCGCTCGAGGGATTCAACGAGGACGCAGCAT	ATTTGCGGCCGCAGTAGAGAATAGGGTGTTGCCATGTTG
miRNA-769-AT-WT	CCGCTCGAGCTGTCTCCTTCTCCAATAAAGATGTAG	ATTTGCGGCCGCTAAAGGAGTCCAAGCAAAGTTTCT
miRNA-93-106b-AT-WT	CCGCTCGAGTGTCCTGTGAGGGAGACCAGAC	ATTTGCGGCCGCGCTCCTTACCGTGCTCTCATTGC
miRNA-432-AT-WT	CAGTAATTCTAGGCGATCGCTCGAGGGAGCATAAGAATCCATCATCA	GATATTTTATTGCGGCCAGCGGCCGCCATAAGTTCTGCGGTTGAGTG
miRNA-409-AT-WT	CAGTAATTCTAGGCGATCGCTCGAGGGATACGGACGGCTAGTGGA	GATATTTTATTGCGGCCAGCGGCCGCGGGTTGGAATCGTTGGACTTG
miRNA-410-AT-WT	CAGTAATTCTAGGCGATCGCTCGAGGCACAACCCTAGCATCTTCCC	GATATTTTATTGCGGCCAGCGGCCGCTTGGAGTCGCTGCCTCAGT
miRNA-377-AT-WT	CAGTAATTCTAGGCGATCGCTCGAGAGCGACATCTGTTCTCATCCA	GATATTTTATTGCGGCCAGCGGCCGCCCAACCATGTTCTGACCACTG
miRNA-377-AT-mut-Fragment1	CAGTAATTCTAGGCGATCGCTCGAGAGCGACATCTGTTCTCATC	TATGTTGAATGTTTGAGTATCAAATCCTGC
miRNA-377-AT-mut-Fragment2	ATACTCAAACATTCAACATAAATAAAGCGAATTCAC	GATATTTTATTGCGGCCAGCGGCCGCCCAACCATGTTCTGACCAC
miRNA-409-AT-mut-Fragment1	CAGTAATTCTAGGCGATCGCTCGAGGGATACGGACGGCTAGTG	TGGACGACGACTTTTCGGTATCAAATTCCACC
miRNA-409-AT-mut-Fragment2	TACCGAAAAGTCGTCGTCCAGATGCAAAG	GATATTTTATTGCGGCCAGCGGCCGCGGGTTGGAATCGTTGGAC
miRNA-410-AT-mut-Fragment1	CAGTAATTCTAGGCGATCGCTCGAGGCACAACCCTAGCATCTTC	TAATGACGAAGTTTTCAGTACCGCTACC
miRNA-410-AT-mut-Fragment2	TACTGAAAACTTCGTCATTAATAAAAGCGAACTCATC	GATATTTTATTGCGGCCAGCGGCCGCTTGGAGTCGCTGCCTCAG
miRNA-432-AT-mut-Fragment1	CAGTAATTCTAGGCGATCGCTCGAGGGAGCATAAGAATCCATC	TCCAGGTCTTGTGGATCCTCTATTTCCTTAC
miRNA-432-AT-mut-Fragment2	GAGGATCCACAAGACCTGGAGGAGTCATG	GATATTTTATTGCGGCCAGCGGCCGCAGTTCTGCGGTTGAGTGC
Primer sequences used to generate AT-miRNA constructs
Name	Forward primer sequence	Reverse primer sequence
miRNA-184-AT-Fragment1	CTGGCTAGCGTTTAAACTTAAGCTTTTGCAGAAAAGAAAAGAAAAAAGTACCTGTTCAGCTGAGATGC	TGATAAGGGTCCGCGCCGCCTGCACTTG
miRNA-184-AT-Fragment2	GGCGGCGCGGACCCTTATCAGTTCTCCG	TTTAAACGGGCCCTCTAGACTCGAGAATACTATACAGAAATCCATTTCTG
miRNA-135b-AT-Fragment1	CTGGCTAGCGTTTAAACTTAAGCTTTGCTTCCTCTTCCACCACAG	AAGCCATGGGAGCTGCACCTCCCATGGG
miRNA-135b-AT-Fragment2	AGGTGCAGCTCCCATGGCTTTTAGCCCTAC	TTTAAACGGGCCCTCTAGACTCGAGCAGTCCTAGAGATGTCTGTG
miRNA-146b-AT-fragment1	TAAGCTTGGTACCGAGCTCGGATCCGCTGAGGCAGGAGAATCAC	CACCTGGCACTGAGCTCTAGCAATGCCC
miRNA-146b-AT-fragment2	CTAGAGCTCAGTGCCAGGTGGCCAAAGTTC	TTTAAACGGGCCCTCTAGACTCGAGCACCGGCTGAGAACATCG
miRNA-632-AT-fragment1	TAAGCTTGGTACCGAGCTCGGATCCATAAACGCAGTACTGTAACAAGCC	CGGCCATTTTCGTGGTGGTAGCCGTTGG
miRNA-632-AT-fragment2	TACCACCACGAAAATGGCCGACGGCCTC	TTTAAACGGGCCCTCTAGACTCGAGCCCAAAGTCAGGCAGCTAAG
miRNA-135A1-AT	CTGGCTAGCGTTTAAACTTAAGCTTTGGATAGAATTGGAGGACTTAGC	TTTAAACGGGCCCTCTAGACTCGAGGGAGGCAGCAGAAGAAGG
miRNA-15b-AT	CTGGCTAGCGTTTAAACTTAAGCTTGCAGGAGCGACAATAAGATG	TTTAAACGGGCCCTCTAGACTCGAGGCAGGCCGTTCTGGATAC
miRNA-184-AT	CTGGCTAGCGTTTAAACTTAAGCTTGACCTTCCACGCTGATTC	TTTAAACGGGCCCTCTAGACTCGAGTCTCACATCCTTCATCCTTC
miRNA-196a2-AT	CTGGCTAGCGTTTAAACTTAAGCTTACTATGACCTCCGAACTCTTC	TTTAAACGGGCCCTCTAGACTCGAGATGCCGTCCTCTCAACCTATC
miRNA-497-AT	CTGGCTAGCGTTTAAACTTAAGCTTCACATAGCAGTGCTGGGAAG	TTTAAACGGGCCCTCTAGACTCGAGTTGAGGTGGAACATTATAGGAAG

## Sheet: qPCR primers
Primer sequences used for real-time PCR of miRNA-ATs or pri-miRNAs
Name	Forward primer sequence	Reverse primer sequence
miRNA-135a-1-AT	TGGAGATTGGGAGGGAGGTAA	GAGGCAGGAACAGGCTACAT
miRNA-135b-AT (CRISPRa experiment)	CTGCTGGACAAGATGAACACT	GCAACCATCAGACACTAGAAGT
miRNA-184-AT	ATCAAGCAAGTTCACCTAGAGG	AAGGAGCAAGGGACAGCAAA
miRNA-195-AT	ACGCAAGGTATATGAAGATTCTGG	TCACTGTTGGCATCGGAGTC
miRNA-215-AT	CGTATGGTGCTGATGTCCTTC	CCGTAACAGCCGAACAACTT
miRNA-216b-AT	CTGTGAGTCTGTGAGCATAGC	GTGTAAGGCAGGAAGAAGGTAAT
miRNA-222-AT	GACAGGATCTACACTGGCTAC	CACTCAGTCAGTATCTGTTGGA
miRNA-27a-AT	GACAAGGAGGCTACAGCAACTT	GTGACATACATACTCGGTGACATCT
miRNA-34a-AT	ATGATGCTCTCGGATGGTATGA	CTGCTCCACGGACATTAGATTC
miRNA-34c-AT	CCTTTCCACACTACCCACCT	GGCTCAATTCCAGGCTCATT
miRNA-425-AT	GGCGGATGACGAGCTGTATC	TTCCACTGCACCACCGAGT
miRNA-95-AT	TTCACTTGACTCTCACCAGCCTACA	AGCCCTCCTCATCTCAGCCTCT
miRNA-99b-AT	CCTGATCCTGTTGTGTTGTGAT	CCTGTGACTTGCTAACTGATGA
miRNA-135b-AT (Drosha knockdown experiment)	GGAGAGGTCAGAGCAGCAAT	TGGAGGATTCACAGATCAGAGG
OE-miRNA-135b-AT-qPCR	AAGGAGTGAAGGAGTGAGGTT	CTCTGAGGAAGGAAGGAGACC
OE-miRNA-184-AT-qPCR	TTATCAGTTCTCCGTCCAACAC	AACATAAGTGACTCTCCAGGTG
OE-miRNA-135a1-AT-qPCR	CCTGCTCAGTCCATACTTGCT	AACACGCCTTCTGGTTCCAA
OE-miRNA-146b-AT-qPCR	TCCCAGGATGAGTAAGTTGAGG	GCAGGAAGCGACAGATGGA
OE-miRNA-15b-AT-qPCR	GTTAGTCTTCACCGCTCTGGA	TGCCTGAGGATCAATCAACGA
OE-miRNA-184-AT-qPCR	GCGTGTCACCATCCTCTTCTT	ACCTTCAAGCCTGCCTCCT
OE-miRNA-196a2-AT-qPCR	CAACATGAGTGTGAGCCTGAG	GCCGCCTGTCCTGTATCTAT
OE-miRNA-497-AT-qPCR	CTTCCTGTGTCCGTCCTTCC	GGTCTCCATTTCCTGCCTTTG
OE-miRNA-632-AT-qPCR	CCGAACAAGATCCTCCTGAGT	CCGTGGTGCTGGTATCCTT
Pri-mir-135b-qPCR	GCTGTCCCAAACTCATGTAGG	CCAAGGTCACACGGCTTAG
Pri-mir-184-qPCR	GCTCGCCGGGAAATCAAAC	TCACAAAGCTGGGCTGGAAA
Primer sequences used for real-time PCR of Drosha and GAPDH
Gene name	Forward primer sequence	Reverse primer sequence
Drosha	GAGACCTAGCCTAGTTTTCCTG	AATGCACATTCACCAAAGTCAA
GAPDH	CCACATCGCTCAGACACCAT	GGCAACAATATCCACTTTACCAG
Primers sequences used for real-time PCR of mature miRNAs
miRNA name	Primer name	Primer sequence
hsa-miR-135a	hsa-miR-135a-5p	TATGGCTTTTTATTCCTATGTGA
hsa-miR-135b	hsa-miR-135b-5p	TATGGCTTTTCATTCCTATGTGA
hsa-miR-184	hsa-miR-184	TGGACGGAGAACTGATAAGGGT
hsa-miR-195	hsa-miR-195-5p	TAGCAGCACAGAAATATTGGC
hsa-miR-215	hsa-miR-215-5p	ATGACCTATGAATTGACAGAC
hsa-miR-216a	hsa-miR-216a-5p	TAATCTCAGCTGGCAACT
hsa-miR-222	hsa-miR-222-3p	TACATCTGGCTACTGGGT
hsa-miR-27a	hsa-miR-27a-3p	TTCACAGTGGCTAAGTTCCGC
hsa-miR-34a	hsa-miR-34a-5p	TGGCAGTGTCTTAGCTGGTTGT
hsa-miR-34c	hsa-miR-34c-5p	AGGCAGTGTAGTTAGCTGATT
hsa-miR-425	hsa-miR-425-3p	ATCGGGAATGTCGTGTCCGCCC
hsa-miR-95	hsa-miR-95-5p	ATAAATGTCTGTTGAATT
hsa-miR-99b	hsa-miR-99b-5p	CACCCGTAGAACCGACCTTGCG
hsa-miR-632	hsa-miR-632	GTGTCTGCTTCCTGTGGGA
hsa-miR-497	hsa-miR-497-5p	CAGCAGCACACTGTGGTTTGT
hsa-miR-196a	hsa-miR-196a-5p	TAGGTAGTTTCATGTTGTTGGG

## Sheet: Gene synthesis
Name	Sequence
Mut-miRNA-107-AT	ATTACTTCCATTTCCGCCCAAGCTGCTCACAGTATACGGGCGTCGGCCTCGAGACTTTGTATGTCACCAGCTCCACCCCTTTTTGTGCCTGGGACTCTGGCTGGCCTTGGCTGTAGCAAGCTCTCTGTGCTTTGAACTCCATGCCACAAGGCAACACTGTAAAGAAGCTGAAAGCAGAGAGAATATCGAATATTGCAAGTCGAGCATTTTACCTGCAGTTATGTGCAAGGATGCTCAGACCTTTTCCTCACGCGGCCGCCCGTCGGCTGATCGTGGTTTTACTAGGCTAGACTAGCGTACGAGCA
Mut-miRNA-10b-AT	ATTACTTCCATTTCCGCCCAAGCTGCTCACACTCGAGGCGGCTGACCAGCGCCGGCTGCTTCTAGTCTCCATGTCGCACTTTGGTCTCTGGCTATTCCGAAGAAACGTGAAGTTTTTGCATCGACCATATATTCCCCTAGAATCGAATCTGTGACTATACGGATACCATATATAGACAACGTTACAACCTCTGGGTCCCACCCAGAGTGAGGTACCTAGGTCGCTGCCGGCCCCAATCTCTTCCTCTGAGCCACCACCGTTCGAGCGGCCGCGGCGTCGGCATCCAGACCGTCGGCTGATCGTG
Mut-miRNA-128-1-AT	ATTACTTCCATTTCCGCCCAAGCTGCTCACAGTATACGGGCGTCTCGAGCCTAGCACAAGCCACTCAGCCCTGTCGGGTTCGTGCTGCTCTTTGGATAACGGCATTCCATTAGGAGTGTGACACAGTAGGGGACCTGCTACTCACTCTCGTACAGTGTATCGGCCCCCCTTCCCACTGCACAGTGGCTGCCGGGCTCTGGGCAGGAGGCATGTGGCCATCATGAAAGTGAACCATGGAGTCAGAGTTCCACCGCGGCCGCCAGACCGTCGGCTGATCGTGGTTTTACTAGGCTAGACTAGCGT
Mut-miRNA-18a-AT	ATTACTTCCATTTCCGCCCAAGCTGCTCACAGTATACGGGCGTCGGCATCCAGACTCGAGCAAACAAAAACTATTAAAACACCTATATACTTGCTTGGCTTGAATTATTGGATGAATACATAACTTCTTATGCCAGAAGGAGCACTTAGGGCAGTAGATGCTAATCTACTTCAGAACAAAAAGCACTCAACATCAGCAGGCCCTGCACTTTAAAGCCCAACTTGGCTTCCCGAGGCAGCTGTCACCATGCGGCCGCCTGATCGTGGTTTTACTAGGCTAGACTAGCGTACGAGCACTATGGTC
Mut-miRNA-30d-AT	ATTACTTCCATTTCCGCCCAAGCTGCTCACAGTATACGGGCGTCGGCATCCAGACCTCGAGACACATTTTATAGCCTCCTCAACTCCACTCCGGGACAGAATTATATCAAGAGGATGTCTGTGAATAGCCGGTAGCAGCAAACATCTGACTGAAAGCTTAGCTGTGTCTTACAGACAACAGACTTTCTGAACAAGAAATTTAAGAGGAGGAACAGACATAAATGTTGCCAGTCATCATCTTCAGCTAATGCGGCCGCTGATCGTGGTTTTACTAGGCTAGACTAGCGTACGAGCACTATGGTC
Mut-miRNA-450a-2-AT	ATTACTTCCATTTCCGCCCAAGCTGCTCACAGTATACGGGCCTCGAGGCCTATAGTGACACAAGTCAGCGATAACCACCTCTAGACTTTTGGTATACTTCCTGATAGCCTCTTTTCCCCATATTATTGATACAAAACTATGAATGCAAAATGTCCCCAATACATTTATATTACATAGTTTAGCATCTTTCTTTGGTCACCTTTATACCACAACTCAGAGATAATCACAATAAAGTTTTTATATGTTTCCTCCTAGCCTTTTATCTGCGGCCGCTCCAGACCGTCGGCTGATCGTGGTTTTACTA
Mut-miRNA-451A-AT	TGCCTTGTTTGAGCTGGAGTCTCCCTTCCAGTAGTCTGCTTCAGGGTCCTGAGTTCTCTTCCTGGCACGTTTTCTGGGTATAGCAAGAGAACCATTACCATTACTAAACTCCTTGCCATTCCCAAGTGCCCTGGCAGTCAGTAGGTTGTGACAGGCTGAGCAGAGAGCTTCTTGGGCTTGCAGCATCTCTCCTGTCCTCCTTGTCAGGCTCCAGAGCT
Mut-miRNA-598-1-AT	ATTACTTCCATTTCCGCCCAAGCTGCTCACAGTATACCTCGAGGAAAGACAAACTATGACAAACAGCCAGTCTCGTGCCCAGCCCAGCGTGGGTGCAAGCTATCTGGTGGCTGCTCGGATGATGATGAGCACCCCATTTCCAGCTCACACCATCGGGATCACCGCCAGCATCAGCAGCATCATCAAGCCATCTTCCTGCGTTGTGGCAGCTTGGGCCCCCACTGGCCATGCAGGAGCCAGGAGATCAAATCATGAATGGCGGCCGCGGCATCCAGACCGTCGGCTGATCGTGGTTTTACTAGG
Edited-miRNA-107-AT	ACTTTGTATGTCACCAGCTCCACCCCTTTTTGTGCCTGGGACTCTGGCTGGCCTTGGCTGTAGCAAGCTCTCTGTGCTTTGATAGCCCTGTGCGGTGCTGCTTGAGCTCCATGCCGCAAGGCAGCACTGTAAGGGGGCTGGAAGCAGAGAGAATATCGAATATTGCAAGTCGAGCATTTTACCTGCAGTTATGTGCAAGGATGCTCAGACCTTTTCCTCAC
Edited-miRNA-184-AT	CCAAGGTCTCCTCCTGGAATCCCCTGCTGTCCTCGGGCACCCAGAGCGGGAACGCCAGGTTTTCCCCATCACGCAAGTGCAGGCGGCGCGGGGGTTCCGGAGGCTGTGAGTGTCGGTCACCTGCCCTTATCAGTTCTCCGTCCAGCACTTACAGTCACAAAGCTGGGCTGGAGAAGTGATAAGGGGACGTGACTGGCCGGCAAAGAAGTTTTGATGAAGCTTTGCAGGACAAGATGTAAATGGACGTTTGATTTCCCGGCGAGCC
Edited-miRNA-18a-AT	CAAACAAAAACTATTAAAACACCTATATACTTGCTTGGCTTGAATTATTGGATGAATACATAACTTCTTATGCCGGAGGGGGCGCTTAGGGCAGTAGGTGCTGATCTACTTCGCTGTCTGCGCTAGGTGCACCTTAGAGCGAAAAGCACTCAACATCAGCAGGCCCTGCACTTTAAAGCCCAACTTGGCTTCCCGAGGCAGCTGTCACCAT
Edited-miRNA-450a-2-AT	GCCTATAGTGACACAAGTCAGCGATAACCACCTCTAGACTTTTGGTATACTTCCTGATAGCCTCTTTTCCCCATATTATTGGTGCAGGGCTATGAATGCAGGGTGTCCCCGATACGTTTATATTACATATTGGGGACACGTCGCAAAAATAGTTTAGCATCTTTCTTTGGTCACCTTTATACCACAACTCAGAGATAATCACAATAAAGTTTTTATATGTTTCCTCCTAGCCTTTTATCT
Edited-miRNA-451A-AT	TGCCTTGTTTGAGCTGGAGTCTCCCTTCCAGTAGTCTGCTTCAGGGTCCTGAGTTCTCTTCCTGGCACGTTTTCTGGGTGTGGCAGGGGAGCCGTTGCCATTGCTAAACTCAGTGGTGGTGGCGGTTTCCTTGCCGTTCCCAAGTGCCCTGGCAGTCAGTAGGTTGTGACAGGCTGAGCAGAGAGCTTCTTGGGCTTGCAGCATCTCTCCTGTCCTCCTTGTCAGGCTCCAGAGCT
Edited-miRNA-497-AT	CCTCCCAGGGCCAAGCCTCGGCGGTGCCTCCCCCACCCTCGCTCTAGCGCCACAGTGTGGTTTGGGCGTGGCCACAGTGCCGTACAAACCACAGTGTGCTGCTGGGGCGGGAGCAGGGCCGGGGTGGGTTGAAAGGAAGAGAGCACATAGCAGTGCTGGGAAGACCCCAGCA
