# Supplementary material for: Sense–antisense miRNA pairs constitute an elaborate reciprocal regulatory circuit
Source: HighWire-hosted journal article supplement (doi:10.1101/gr.257121.119), 2020-05-01
Supplement: Supplemental_Table_S7.xlsx [file Supplemental_Table_S7.xlsx]

## Sheet: gRNA
Supplemental Table S7. gRNA sequences used for dCas9-based transcriptional regulation.
Name	Sequence	Distance between sgRNA and the miRNA promoter (bp)
miRNA-135a-1-AT-gRNA#1	ACATGCCGCTTATGTGCTTG	7246
miRNA-135a-1-AT-gRNA#2	TGCCTGTAATCCCAGCTACT
miRNA-135a-1-AT-gRNA#3	GTACTTCCGTTCTCCAGCGC
miRNA-135a-1-AT-gRNA#4	AGAATCTCACTCTGTCACCC
miRNA-135b-AT-gRNA#1	GTCATTGCCACTCCCTGAGG	14812
miRNA-135b-AT-gRNA#2	TCACAGAGAGCGGGAGACGG
miRNA-135b-AT-gRNA#3	TCAGCCTGACTCTCACCCGA
miRNA-135b-AT-gRNA#4	TTCAGTGGAAACTCTTAGGG
miRNA-184-AT-gRNA#1	ACACCTTCCGAAATCCGGGG	74248
miRNA-184-AT-gRNA#2	TAAACGCTGCCAGATTGCAG
miRNA-184-AT-gRNA#3	CAAAGGGACTGGGCACAGAG
miRNA-184-AT-gRNA#4	GGTACACCTTCCGAAATCCG
miRNA-195-AT-gRNA#1	TCACCAGTTAAACATACAAA	8504
miRNA-195-AT-gRNA#2	GCGATGATAAAATGTTACTT
miRNA-195-AT-gRNA#3	TACTCACGCCCTAGCTACAG
miRNA-195-AT-gRNA#4	GCCTGTAATCCCAGCTACTC
miRNA-215-AT-gRNA#1	GCCAAATCCATTAAGCCAAA	25674
miRNA-215-AT-gRNA#2	TTACCCAAGTGTGCCTGTTG
miRNA-215-AT-gRNA#3	AGCGCGTGCGCCCTCTTACT
miRNA-215-AT-gRNA#4	CTGCTTCGCACAGATTTTGT
miRNA-216b-AT-gRNA#1	GTAGACATGAAATCCCGGGG	49062
miRNA-216b-AT-gRNA#2	TTGGGCGGCACTTTAAAGGT
miRNA-216b-AT-gRNA#3	GTGAGCTCCTGGTCTAGCGA
miRNA-216b-AT-gRNA#4	AGAGGTTGAGGGCTACACAA
miRNA-27a-AT-gRNA#1	GTATTGCCCAGAGCCCACAG	47274
miRNA-27a-AT-gRNA#2	CCTTCGAGCAGGTGACCGCG
miRNA-27a-AT-gRNA#3	TGGCATTTCAGTAATCCCTG
miRNA-27a-AT-gRNA#4	GTGTAAAGTGGGGAGGTCCA
miRNA-34a-AT-gRNA#1	GTCAAGAGCTTAGCGTGCAG	37673
miRNA-34a-AT-gRNA#2	CCTGGTAGTGCTGCTAGCAG
miRNA-34a-AT-gRNA#3	CATACAGCAAGCTCTCAATG
miRNA-34a-AT-gRNA#4	ACTCTCTCTGACTTGTGATC
miRNA-34c-AT-gRNA#1	CAGGTTGGATAAGTTCCTGG	31505
miRNA-34c-AT-gRNA#2	GTGCGCGACAACTGCAACCG
miRNA-34c-AT-gRNA#3	CCTCCCGACTGAAAGGAAAG
miRNA-34c-AT-gRNA#4	TCGAGCGTTCCAGGACGCGC
